# Supplementary material for: New prodigiosin derivatives – chemoenzymatic synthesis and physiological evaluation against cisplatin-resistant cancer cells
Source: Royal Society of Chemistry journal article supplement (doi:10.1039/d3cy00913k), 2023-01-01
Supplement: d3cy00913k1.pdf [file d3cy00913k1.pdf]

## Supporting Information

### **New Prodigiosin Derivatives – Chemoenzymatic Synthesis and Physiological Evaluation against Cisplatin-Resistant Cancer Cells**

Tim Moritz Weber<sup>a</sup>, Alexandra Leyens<sup>b</sup>, Lena Berning<sup>c</sup>, Björn Stork<sup>c</sup>, and Jörg Pietruszka<sup>\*,a,b</sup>

<sup>a</sup> Institute of Bioorganic Chemistry (IBOC), Heinrich Heine University Düsseldorf, Wilhelm-Johnen-Straße, 52428 Jülich, Germany.

<sup>b</sup> Institute of Bio- and Geosciences (IBG-1): Bioorganic Chemistry, Jülich Research Center, Wilhelm-Johnen-Straße, 52428 Jülich, Germany.

<sup>c</sup> Institute of Molecular Medicine I, Medical Faculty and University Hospital Düsseldorf, Heinrich Heine University Düsseldorf, Universitätsstraße 1, 40225 Düsseldorf, Germany.

\*Correspondence address: [j.pietruszka@fz-juelich.de](mailto:j.pietruszka@fz-juelich.de)

## Table of Contents

|                                                                                                                                                                           |     |
|---------------------------------------------------------------------------------------------------------------------------------------------------------------------------|-----|
| 1. Slopes and absorption spectra of prodiginines <b>16ba–bc</b> for determination of molar extinction coefficients.....                                                   | S4  |
| 2. Influence of A-ring substitution on molar extinction coefficients of prodiginines <b>16ba–bc</b> .....                                                                 | S5  |
| 3. Molar extinction coefficients of synthesised prodiginines <b>16ba–bc</b> and approximation of extinction coefficients for unknown derivatives.....                     | S5  |
| 4. Raw data of UV absorbance for prodiginines from biocatalysis for quantification of LC-MS extracts.....                                                                 | S6  |
| 5. General information and instrumentation.....                                                                                                                           | S7  |
| 6. Quantitative NMR.....                                                                                                                                                  | S7  |
| 7. Photographic records.....                                                                                                                                              | S7  |
| 8. Chemical syntheses.....                                                                                                                                                | S7  |
| 9. References.....                                                                                                                                                        | S9  |
| 10. NMR Spectra.....                                                                                                                                                      | S10 |
| 4-Methoxy-1 <i>H</i> ,1' <i>H</i> -[2,2'-bipyrrole]-5-carbaldehyde ( <b>3a</b> ).....                                                                                     | S10 |
| 4-Methoxy-5'-methyl-1 <i>H</i> ,1' <i>H</i> -[2,2'-bipyrrole]-5-carbaldehyde ( <b>3b</b> ).....                                                                           | S11 |
| 5'-Ethyl-4-methoxy-1 <i>H</i> ,1' <i>H</i> -[2,2'-bipyrrole]-5-carbaldehyde ( <b>3c</b> ).....                                                                            | S12 |
| 4-Methoxy-5'-propyl-1 <i>H</i> ,1' <i>H</i> -[2,2'-bipyrrole]-5-carbaldehyde ( <b>3d</b> ).....                                                                           | S13 |
| 5'-Butyl-4-methoxy-1 <i>H</i> ,1' <i>H</i> -[2,2'-bipyrrole]-5-carbaldehyde ( <b>3e</b> ).....                                                                            | S14 |
| 4-Methoxy-5'-pentyl-1 <i>H</i> ,1' <i>H</i> -[2,2'-bipyrrole]-5-carbaldehyde ( <b>3f</b> ).....                                                                           | S15 |
| 5'-Hexyl-4-methoxy-1 <i>H</i> ,1' <i>H</i> -[2,2'-bipyrrole]-5-carbaldehyde ( <b>3g</b> ).....                                                                            | S16 |
| 2-Methyl-3-pentyl-1 <i>H</i> -pyrrole ( <b>4a</b> ).....                                                                                                                  | S17 |
| 2-Methyl-3-propyl-1 <i>H</i> -pyrrole ( <b>4b</b> ).....                                                                                                                  | S18 |
| 3-Heptyl-2-methyl-1 <i>H</i> -pyrrole ( <b>4c</b> ).....                                                                                                                  | S19 |
| ( <i>E/Z</i> )-Octan-2-one oxime ( <b>8a</b> ).....                                                                                                                       | S20 |
| ( <i>E/Z</i> )-Hexan-2-one oxime ( <b>8b</b> ).....                                                                                                                       | S21 |
| ( <i>E/Z</i> )-Decan-2-one oxime ( <b>8c</b> ).....                                                                                                                       | S22 |
| ( <i>Z</i> )- <i>N</i> -[(5-Bromo-3-methoxy-2 <i>H</i> -pyrrol-2-ylidene)methyl]- <i>N</i> -ethylethanamine ( <b>10</b> ).....                                            | S23 |
| 1- <i>tert</i> -Butyloxycarbonyl 2-methyl-1 <i>H</i> -pyrrole ( <b>14b</b> ).....                                                                                         | S24 |
| 1- <i>tert</i> -Butyloxycarbonyl 2-ethyl-1 <i>H</i> -pyrrole ( <b>14c</b> ).....                                                                                          | S25 |
| 1- <i>tert</i> -Butyloxycarbonyl 2-propyl-1 <i>H</i> -pyrrole ( <b>14d</b> ).....                                                                                         | S26 |
| 1- <i>tert</i> -Butyloxycarbonyl 2-butyl-1 <i>H</i> -pyrrole ( <b>14e</b> ).....                                                                                          | S27 |
| 1- <i>tert</i> -Butyloxycarbonyl 2-pentyl-1 <i>H</i> -pyrrole ( <b>14f</b> ).....                                                                                         | S28 |
| 1- <i>tert</i> -Butyloxycarbonyl 2-hexyl-1 <i>H</i> -pyrrole ( <b>14g</b> ).....                                                                                          | S29 |
| (1-( <i>tert</i> -Butoxycarbonyl)-5-methyl-1 <i>H</i> -pyrrol-2-yl)boronic acid ( <b>15b</b> ).....                                                                       | S30 |
| (1-( <i>tert</i> -Butoxycarbonyl)-5-ethyl-1 <i>H</i> -pyrrol-2-yl)boronic acid ( <b>15c</b> ).....                                                                        | S31 |
| (1-( <i>tert</i> -Butoxycarbonyl)-5-propyl-1 <i>H</i> -pyrrol-2-yl)boronic acid ( <b>15d</b> ).....                                                                       | S32 |
| (1-( <i>tert</i> -Butoxycarbonyl)-5-butyl-1 <i>H</i> -pyrrol-2-yl)boronic acid ( <b>15e</b> ).....                                                                        | S33 |
| (1-( <i>tert</i> -Butoxycarbonyl)-5-pentyl-1 <i>H</i> -pyrrol-2-yl)boronic acid ( <b>15f</b> ).....                                                                       | S34 |
| (1-( <i>tert</i> -Butoxycarbonyl)-5-hexyl-1 <i>H</i> -pyrrol-2-yl)boronic acid ( <b>15g</b> ).....                                                                        | S35 |
| <i>tert</i> -Butyl 5'-formyl-4'-methoxy-1 <i>H</i> ,1' <i>H</i> -[2,2'-bipyrrole]-1-carboxylate ( <b>S1</b> ).....                                                        | S36 |
| ( <i>Z</i> )-4'-Methoxy-5'-((5-methyl-4-pentyl-1 <i>H</i> -pyrrol-2-yl)methylene)-1 <i>H</i> ,5' <i>H</i> -[2,2'-bipyrrol]-1'-ium chloride ( <b>1</b> , prodigiosin)..... | S37 |
| ( <i>Z</i> )-4'-Methoxy-5-methyl-5'-((5-methyl-4-propyl-1 <i>H</i> -pyrrol-2-yl)methylene)-1 <i>H</i> ,5' <i>H</i> -[2,2'-bipyrrol]-1'-ium chloride ( <b>16bb</b> ).....  | S38 |
| ( <i>Z</i> )-4'-Methoxy-5-methyl-5'-((5-methyl-4-pentyl-1 <i>H</i> -pyrrol-2-yl)methylene)-1 <i>H</i> ,5' <i>H</i> -[2,2'-bipyrrol]-1'-ium chloride ( <b>16ba</b> ).....  | S39 |
| ( <i>Z</i> )-4'-Methoxy-5-methyl-5'-((5-methyl-4-heptyl-1 <i>H</i> -pyrrol-2-yl)methylene)-1 <i>H</i> ,5' <i>H</i> -[2,2'-bipyrrol]-1'-ium chloride ( <b>16bc</b> ).....  | S40 |
| ( <i>Z</i> )-5-Ethyl-4'-methoxy-5'-((5-methyl-4-pentyl-1 <i>H</i> -pyrrol-2-yl)methylene)-1 <i>H</i> ,5' <i>H</i> -[2,2'-bipyrrol]-1'-ium chloride ( <b>16ca</b> ).....   | S41 |

|                                                                                                                                                                                                                                              |      |
|----------------------------------------------------------------------------------------------------------------------------------------------------------------------------------------------------------------------------------------------|------|
| (Z)-4'-Methoxy-5-propyl-5'-((5-methyl-4-pentyl-1 <i>H</i> -pyrrol-2-yl)methylene)-1 <i>H</i> ,5' <i>H</i> -[2,2'-bipyrrol]-1'-ium chloride<br>( <b>16da</b> ) .....                                                                          | S42  |
| (Z)-5-Butyl-4'-methoxy-5'-((5-methyl-4-pentyl-1 <i>H</i> -pyrrol-2-yl)methylene)-1 <i>H</i> ,5' <i>H</i> -[2,2'-bipyrrol]-1'-ium chloride<br>( <b>16ea</b> ) .....                                                                           | S43  |
| (Z)-4'-Methoxy-5-pentyl-5'-((5-methyl-4-pentyl-1 <i>H</i> -pyrrol-2-yl)methylene)-1 <i>H</i> ,5' <i>H</i> -[2,2'-bipyrrol]-1'-ium chloride<br>( <b>16fa</b> ) .....                                                                          | S44  |
| (Z)-5-Hexyl-4'-methoxy-5'-((5-methyl-4-pentyl-1 <i>H</i> -pyrrol-2-yl)methylene)-1 <i>H</i> ,5' <i>H</i> -[2,2'-bipyrrol]-1'-ium chloride<br>( <b>16ga</b> ) .....                                                                           | S45  |
| 11. LC-MS Chromatograms – Synthetic References .....                                                                                                                                                                                         | S46  |
| MBC Derivatives .....                                                                                                                                                                                                                        | S46  |
| Pyrroles.....                                                                                                                                                                                                                                | S53  |
| Prodiginines.....                                                                                                                                                                                                                            | S56  |
| 12. LC-MS Chromatograms – Biocatalytic <i>In Vitro</i> Experiments .....                                                                                                                                                                     | S65  |
| 13. LC-MS Chromatograms – Negative Controls .....                                                                                                                                                                                            | S149 |
| 14. LC-MS Chromatograms – Control Reactions .....                                                                                                                                                                                            | S153 |
| 15. Dose-response plots for cell viability screening of urothelial carcinoma cell lines RT-112 and RT-112 <sup>res</sup> with<br>chemically synthesised prodiginines <b>16ba–gb</b> , prodigiosin ( <b>1</b> ), and obatoclax mesylate ..... | S159 |
| 16. Inhibitory Concentrations (IC <sub>50</sub> ) of prodiginines against urothelial cancer cell lines RT-112 and RT-112 <sup>res</sup> .....                                                                                                | S162 |

### 1. Slopes and absorption spectra of prodiginines 16ba–bc for determination of molar extinction coefficients

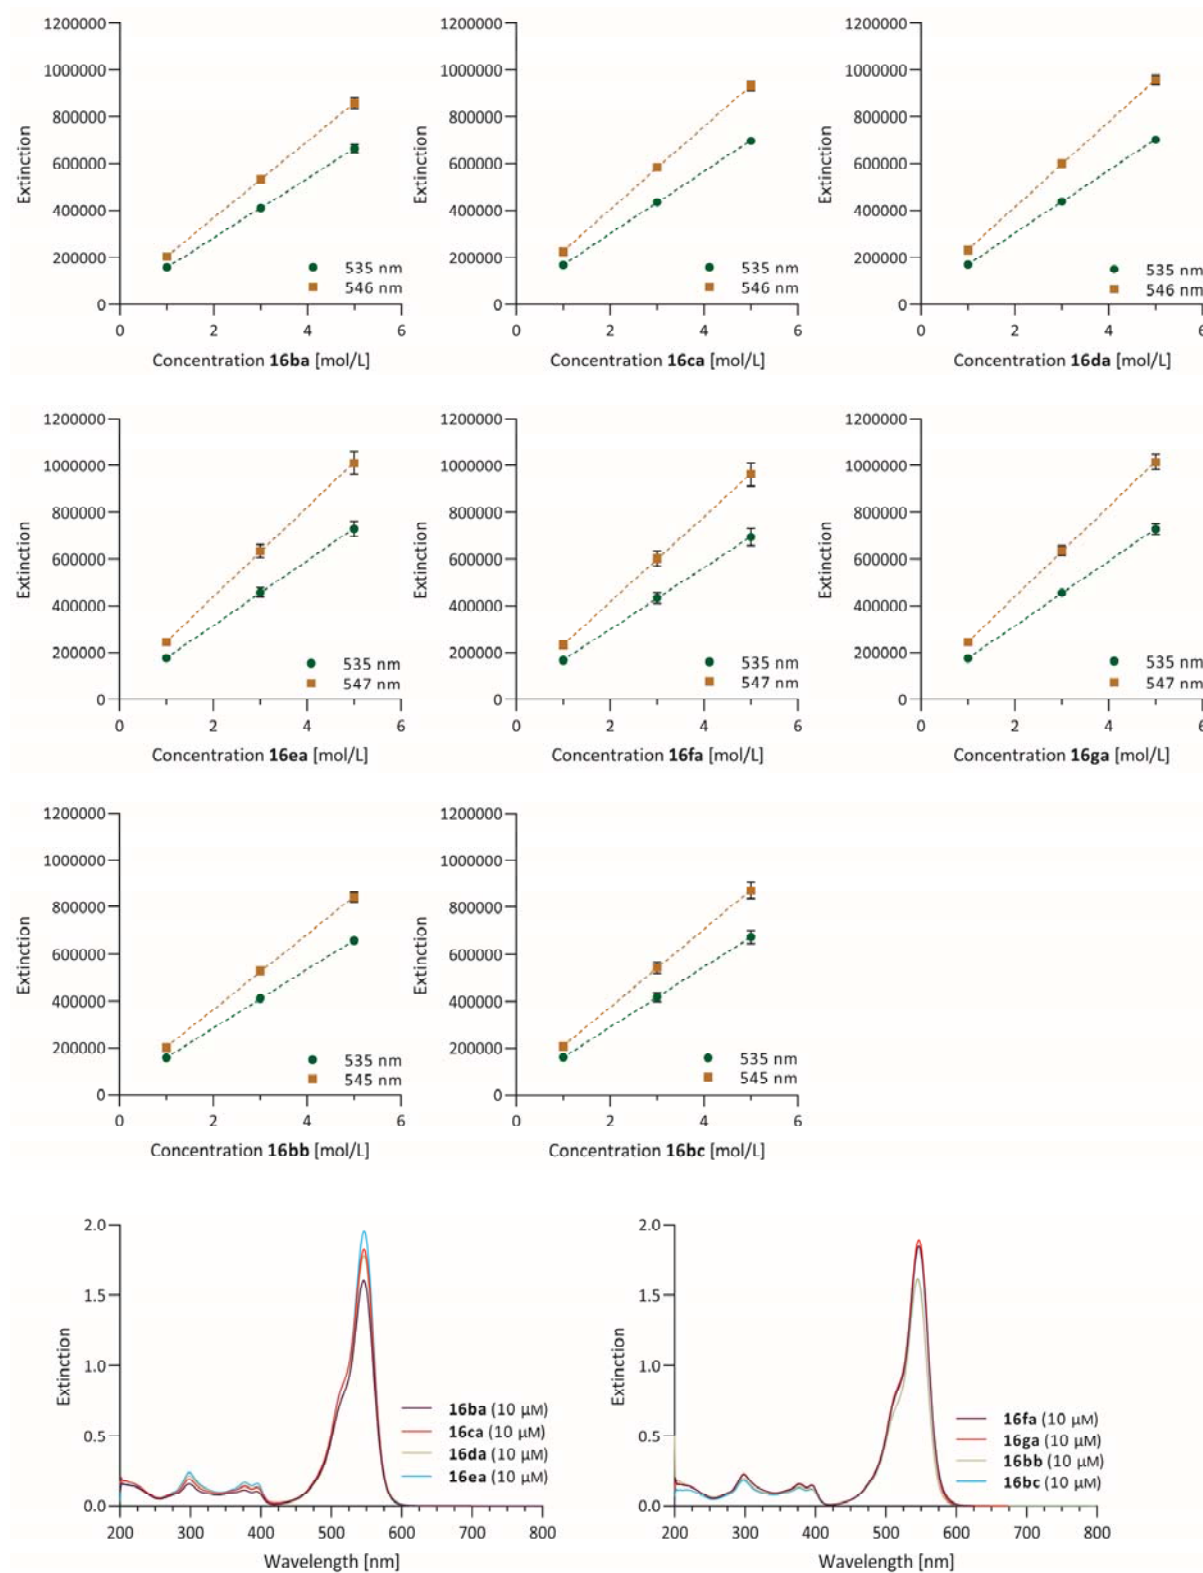

**Figure S1:** Extinction values for different molar concentrations of prodiginines **16ba–bc** in acidic ethanol. Measured extinctions at 535 nm and at the absorption maximum of 1 μM, 3 μM, and 5 μM prodiginine solutions were plotted against the concentrations and the molar extinction coefficients determined from the slope of linear regression in agreement with the Beer-Lambert law. Absorptions spectra of 10 μM prodiginine solutions in acidic ethanol were recorded from 200–800 nm.

**Table S1:** Fit parameters for determination of molar extinction coefficients of prodiginines **16ba–bc** from linear regression.

| Prodiginine | $\lambda_{\max}$<br>[nm] | Replikates | 535 nm |             |                | $\lambda_{\max}$ |             |                |
|-------------|--------------------------|------------|--------|-------------|----------------|------------------|-------------|----------------|
|             |                          |            | Slope  | Y-Intersect | R <sup>2</sup> | Slope            | Y-Intersect | R <sup>2</sup> |
| <b>16ba</b> | 546                      | 3          | 126508 | 31353       | 0.9975         | 163533           | 42056       | 0.9976         |
| <b>16ca</b> | 546                      | 3          | 132425 | 36969       | 0.9981         | 177092           | 50169       | 0.9980         |
| <b>16da</b> | 546                      | 3          | 133375 | 37697       | 0.9984         | 181692           | 51814       | 0.9983         |
| <b>16ea</b> | 547                      | 3          | 138350 | 39206       | 0.9929         | 191400           | 55522       | 0.9929         |
| <b>16fa</b> | 547                      | 3          | 131608 | 36631       | 0.9902         | 182125           | 52236       | 0.9903         |
| <b>16ga</b> | 547                      | 3          | 138200 | 38244       | 0.9966         | 192358           | 54403       | 0.9965         |
| <b>16bb</b> | 545                      | 3          | 125450 | 32839       | 0.9979         | 160358           | 42714       | 0.9980         |
| <b>16bc</b> | 545                      | 3          | 128500 | 32011       | 0.9939         | 166267           | 42189       | 0.9941         |

## 2. Influence of A-ring substitution on molar extinction coefficients of prodiginines **16ba–bc**

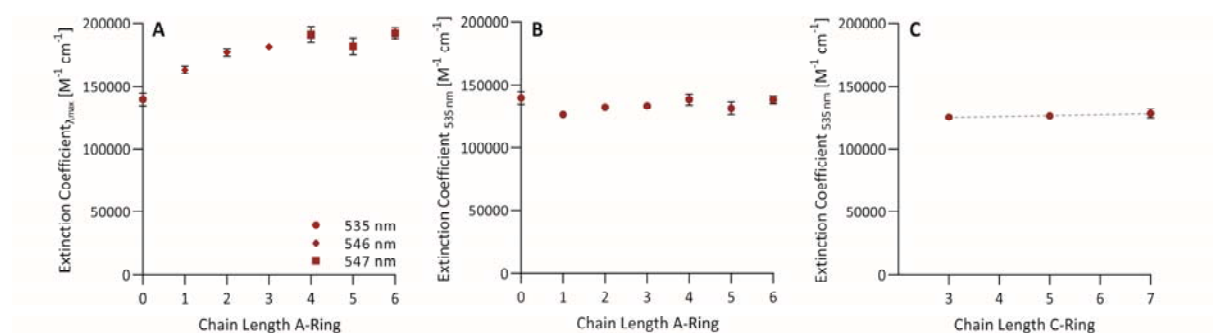

**Figure S2:** Molar extinction coefficients of chemically synthesised prodiginines **16ba–16bc** in acidic ethanol. All measurements were performed in triplicates and standard errors are given by error bars. (A) Molar extinction coefficients at the wavelength of maximum absorption in relation to the A-ring substitution with constant pentyl-substitution on the C-ring. The determined absorption maximum is indicated by varying symbols. (B) Molar extinction coefficients in relation to the A-ring substitution at 535 nm with constant pentyl-substitution on the C-ring. (C) Molar extinction coefficients of the methyl-substituted A-ring derivatives **16ba**, **16bb**, and **16bc** at 535 nm in dependence of C-ring substitution. Linear regression was applied to determine the slope and allow approximation of extinction coefficients for prodiginines, which had not been synthesised by chemical means.

## 3. Molar extinction coefficients of synthesised prodiginines **16ba–bc** and approximation of extinction coefficients for unknown derivatives

**Table S2:** Experimental molar extinction coefficients ( $\epsilon$ ) of chemically synthesised prodiginines **16ba–bc** at 535 nm and at the respective absorption maximum in acidic ethanol with standard errors.

| Prodiginine | $\lambda_{\max}$<br>[nm] | $\epsilon_{535}$<br>[ $M^{-1} cm^{-1}$ ] | $\epsilon_{\lambda_{\max}}$<br>[ $M^{-1} cm^{-1}$ ] |
|-------------|--------------------------|------------------------------------------|-----------------------------------------------------|
| <b>16ba</b> | 546                      | 126508 ± 2380                            | 163533 ± 3040                                       |
| <b>16ca</b> | 546                      | 132425 ± 2211                            | 177092 ± 2960                                       |
| <b>16da</b> | 546                      | 133375 ± 1200                            | 181692 ± 2797                                       |
| <b>16ea</b> | 547                      | 138350 ± 4432                            | 191400 ± 6105                                       |
| <b>16fa</b> | 547                      | 131608 ± 4950                            | 182125 ± 6805                                       |
| <b>16ga</b> | 547                      | 138200 ± 3071                            | 192358 ± 4337                                       |
| <b>16bb</b> | 545                      | 125450 ± 2176                            | 160358 ± 2707                                       |
| <b>16bc</b> | 545                      | 128500 ± 3815                            | 166267 ± 4848                                       |

The methyl-substituted prodiginine A-ring derivatives **16ba**, **16bb**, and **16bc** show a linear correlation of their molar extinction coefficients at 535 nm (Figure S2C). Based on the equation for the linear regression fit, the experimentally determined extinction coefficients of prodiginines (Table S2) were used to approximate the extinction coefficients of derivatives that had not been accessed by chemical synthesis. As the C5-monopyrrole **4a** was fused with each MBC derivative **3a–g**, the extinction coefficients for shortened C3 or elongated C7 C-ring substituted prodiginines could be calculated. Therefore, the equation from the linear regression (Figure S2C) was employed (equation S1.1).

$$\epsilon_{535}(n) = 762.5 \text{ M}^{-1} \text{ cm}^{-1} \cdot n + 123007 \text{ M}^{-1} \text{ cm}^{-1} \quad (\text{S1.1})$$

$\epsilon$ : Molar extinction coefficient

$n$ : A-ring chain length of prodiginines

Under the assumption that the slope of  $762.5 \text{ M}^{-1} \text{ cm}^{-1}$  would behave similarly with increasing chain length on the A-ring, approximated extinction coefficients at 535 nm were calculated for prodiginines with C3 or C7 substitution on the C-ring (Table S3).

**Table S3:** Approximated\* molar extinction coefficients at 535 nm in acidic ethanol of prodiginines, which had not been synthesised chemically.

| Prodiginine | Substitution<br>A-Ring | Substitution<br>C-Ring | Approximated $\epsilon_{535}$<br>[ $\text{M}^{-1} \text{ cm}^{-1}$ ] |
|-------------|------------------------|------------------------|----------------------------------------------------------------------|
| 16ab        | H                      | propyl                 | 138275                                                               |
| 16ac        | H                      | heptyl                 | 141325                                                               |
| 16cb        | ethyl                  | propyl                 | 130900                                                               |
| 16cc        | ethyl                  | heptyl                 | 133950                                                               |
| 16db        | propyl                 | propyl                 | 131850                                                               |
| 16dc        | propyl                 | heptyl                 | 134900                                                               |
| 16eb        | butyl                  | propyl                 | 136825                                                               |
| 16ec        | butyl                  | heptyl                 | 139875                                                               |
| 16fb        | pentyl                 | propyl                 | 130083                                                               |
| 16fc        | pentyl                 | heptyl                 | 133133                                                               |
| 16gb        | hexyl                  | propyl                 | 136675                                                               |
| 16gc        | hexyl                  | heptyl                 | 139725                                                               |

\*The calculation was based on the equation  $\epsilon_{535}(n) = 762.5 \text{ M}^{-1} \text{ cm}^{-1} \cdot n + 123007 \text{ M}^{-1} \text{ cm}^{-1}$ .

#### 4. Raw data of UV absorbance for prodiginines from biocatalysis for quantification of LC-MS extracts

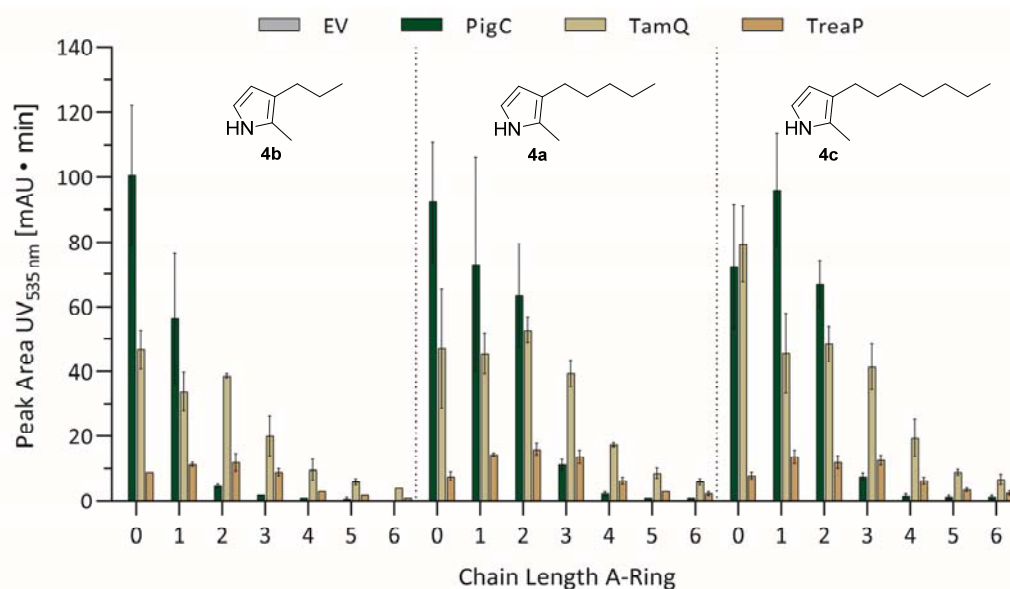

**Figure S3:** Raw data (integrated areas of UV absorbance at 535 nm) of prodiginines from *in vitro* reactions with the prodiginine ligases PigC, TamQ, TreaP and the empty vector control with varying chain lengths on the A- and C-ring. Methanolic extracts of biocatalytic reactions between monopyrroles **4a–c** and 5-alkyl MBC derivatives **3a–g** were subjected to coupled LC-MS measurements and the UV absorbance at 535 nm was integrated. The chain length of alkylated MBC is depicted on the x-axis of the bar diagram, the used monopyrrole is shown in the diagram. Each experiment was performed in triplicates. It should be noted that prodiginosin (**1**) and the prodiginines **16ab** and **16ac**, derived from unsubstituted MBC **3a**, exhibit an absorption maximum at 535 nm, while the absorption maximum for all other prodiginines was shifted to 545–547 nm. Thus, the true amount of all other A-ring substituted prodiginines is underestimated unless extinction coefficients are applied to quantify the exact amount of prodiginines in the extracts.

## 5. General information and instrumentation

High-resolution mass spectrometry (HRMS) data were recorded on a Bruker maXis instrument (at CeMSA in Düsseldorf) with a standard collision energy of 8 eV. However, for Boc-protected 1*H*-pyrroles a reduction to 2–4 eV was obligatory, as Boc-protecting groups showed fragmentation towards the carbamic acid [M–56.0626]. <sup>1</sup>H, <sup>13</sup>C, DEPT135, <sup>1</sup>H-<sup>1</sup>H-COSY, <sup>1</sup>H-<sup>13</sup>C-HSQC, and <sup>1</sup>H-<sup>13</sup>C-HMBC NMR data were either collected on a Bruker Avance/DRX 600 or DRX 300 spectrometer. CDCl<sub>3</sub> or DMSO-*d*<sub>6</sub> were used as NMR solvents and their respective chemical shifts (CDCl<sub>3</sub>: <sup>1</sup>H - 7.26 ppm, <sup>13</sup>C - 77.16 ppm; DMSO-*d*<sub>6</sub>: <sup>1</sup>H - 2.50 ppm, <sup>13</sup>C - 39.52 ppm) used for referencing. Due to the significant amount of quaternary carbon atoms in MBC- and prodiginine derivatives, the default NMR scan numbers were significantly increased for <sup>13</sup>C (6000–8000 scans), COSY (10 scans), HSQC (10 scans), and HMBC (60–100 scans) pulse sequences to allow complete annotation of signals to corresponding <sup>1</sup>H and <sup>13</sup>C atoms. For melting point determination, the Büchi melting point apparatus B-540 was employed and the temperature increment was set to 2 °C/min. Thin layer chromatography was performed using Macherey-Nagel POLYGRAM SIL G/UV<sub>254</sub> plates (40 x 80 x 0.2 mm). Visualisation of different compounds on TLC was achieved using various staining methods, including excitation under UV light, KMnO<sub>4</sub> (7.5 g/L KMnO<sub>4</sub>, 50 g/L K<sub>2</sub>CO<sub>3</sub>, 625 mg/L NaOH in water) and *p*-anisaldehyde (300 mL glacial acetic acid, 6 mL conc. H<sub>2</sub>SO<sub>4</sub>, 3 mL *p*-anisaldehyde).

## 6. Quantitative NMR

Quantitative <sup>1</sup>H-NMR (qNMR) was used to determine the purity of chemically synthesised prodiginines. In a 1.5 mL reaction tube, triphenylmethane (used as secondary qNMR standard) and prodiginine were weighed and dissolved in 500 µL CDCl<sub>3</sub>. For each prodiginine, four independent sets of <sup>1</sup>H-qNMR samples were prepared and spectra measured at 600 MHz to determine the purity, calculated by equation S2.1. For the calculation of purities, the methyl group of triphenylmethane (5.52 ppm) and the methoxy group of prodiginines (3.95 ppm) were integrated in a range of ± 50 Hz from the centre of the signal.

$$P_{Prod} = \frac{I_{Prod}}{I_{Std}} \cdot \frac{N_{Std}}{N_{Prod}} \cdot \frac{M_{Prod}}{M_{Std}} \cdot \frac{m_{Std}}{m_{Prod}} \cdot P_{Std} \quad (S2.1)$$

Prod = Product  
Std = Standard  
m = Mass  
N = Number of absorbing Protons  
M = Molecular weight  
I = Signal area/integral  
P = Purity (in percent)

## 7. Photographic records

Photographs were recorded on a Canon EOS 6D digital reflex camera with the following instrument settings: ISO 250, shutter speed 1/13 s<sup>-1</sup>, aperture F/13, focal distance 100 mm, manual white balance. For the purpose of image processing in Corel PHOTO-PAINT 2019, photographs were saved as .CR2 (Canon Raw 2) raw image files. By using Corel, all images (including the colour and grey control card) were edited to alter the light exposure from 0.0 to 1.0 and the brightness was increased from 0 to 25. Each reaction tube was saved individually as TIFF file with transparent background and 600 dpi resolution.

## 8. Chemical syntheses

### (*Z*)-4'-Methoxy-5'-((5-methyl-4-pentyl-1*H*-pyrrol-2-yl)methylene)-1*H*,5'*H*-[2,2'-bipyrrol]-1'-ium chloride (**1**, prodigiosin)

Under N<sub>2</sub> atmosphere, 2-methyl-3-pentyl-1*H*-pyrrole (**4a**, 651 mg, 4.31 mmol, 2.50 eq.) and Boc-MBC (**3a**, 500 mg, 1.72 mmol, 1.00 eq.) were dissolved in MeOH (40 mL) and cooled to 0 °C. HCl in MeOH (1.25 M, 3.58 mL, 2.24 mmol, 1.30 eq.) was added dropwise and the solution stirred for 60 min at 21 °C. A second portion of HCl in MeOH (1.25 M, 3.58 mL, 2.24 mmol, 1.30 eq.) was added and the solution further stirred at 21 °C for 18 h. The reaction was quenched by the addition of 25% NH<sub>3</sub> (aq.) and the solvent evaporated. The residue was diluted with CH<sub>2</sub>Cl<sub>2</sub> (100 mL) and washed with brine (2 x 100 mL). The organic phase was dried over MgSO<sub>4</sub>, filtered over degreased cotton wool and the solvent evaporated. Chromatography on silica using CH<sub>2</sub>Cl<sub>2</sub> + 0.7% 7 N NH<sub>3</sub> in MeOH, followed by chromatography on silica using *n*-pentane/CH<sub>2</sub>Cl<sub>2</sub> (60:40) + 4% 7 N NH<sub>3</sub> in MeOH afforded the desired product (423 mg, 1.17 mmol, 68%) as deep purple amorphous solid.

δ<sup>1</sup>H (300 MHz, CDCl<sub>3</sub>) 0.88 (3 H, t, 11''-H), 1.22–1.39 (4 H, m, 9''-H, 10''-H), 1.52 (2 H, p, 8''-H), 2.38 (2 H, t, 7''-H), 2.54 (3 H, s, 6''-H), 3.99 (3 H, s, 7'-H), 6.07 (1 H, d, 3'-H), 6.34 (1 H, dt, 4-H), 6.67 (1 H, d, 3''-H), 6.91 (1 H, ddd, 3-H), 6.94 (1 H, s, 6'-H), 7.22 (1 H, td, 5-H), 12.55 (1 H, brs, 1-H), 12.69 (2 H, brs, 1'-H, 1''-NH).

$\delta^{13}\text{C}$  (76 MHz,  $\text{CDCl}_3$ ) 12.6 (C-6''), 14.2 (C-11''), 22.6 (C-10''), 25.4 (C 7''), 29.9 (C-8''), 31.6 (C-9''), 58.8 (C-7'), 93.0 (C-3'), 111.9 (C 4), 116.1 (C-6'), 117.2 (C-3), 120.8 (C-5'), 122.4 (C-2), 125.3 (C-2''), 127.0 (C-5), 128.5 (C-3''), 128.6 (C-4''), 147.1 (C-5''), 147.8 (C-2'), 165.9 (C-4').

FT-IR (neat,  $\text{cm}^{-1}$ ): 3215, 3154, 3098, 3070, 3011, 2954, 2924, 2853, 1633, 1604, 1575, 1544, 1509, 1469, 1148, 1412, 1385, 1351, 1278, 1264, 1250, 1198, 1135, 1065, 1042, 998, 988, 956, 888, 879, 836, 808, 785, 744, 716, 697, 650, 622, 594, 544, 502, 461.

$T_m$ : 135.5–139.9 °C.

HRMS-ESI ( $m/z$ ):  $[\text{M}-\text{Cl}]^+$  calculated for  $\text{C}_{20}\text{H}_{26}\text{N}_3\text{O}$  324.2070, found 324.2077.

$t_R$  (LC-MS Method): 7.67 min.

#### 4-Methoxy-1*H*,1'*H*-[2,2'-bipyrrole]-5-carbaldehyde (**3a**, MBC)

In a 10 mL microwave vial, Boc-MBC **51** (500 mg, 1.72 mmol, 1.00 eq.) was suspended in 2,2,2-trifluoroethanol (4.96 mL, 68.9 mmol, 40.0 eq.) and heated at constant power of 50 W up to 120 °C in a CEM Discover laboratory microwave. During subsequent cooling, the product crystallised from a dark purple to black solution. The product was recovered by filtration and repeatedly washed with EtOAc, to remove residual purple impurities. MBC **3a** (267 mg, 1.40 mmol, 81%) was finally obtained as metallic silver powder.

$\delta^1\text{H}$  (600 MHz, DMSO) 11.43 (1 H, s, 1-H), 11.24 (1 H, s, 1'-H), 9.30 (1 H, s, 7-H), 6.91 (1 H, m, 5'-H), 6.75 (1 H, s, 3'-H), 6.27 (1 H, m, 3-H), 6.12 (1 H, m, 4'-H), 3.83 (3 H, s, 10-H).

$\delta^{13}\text{C}$  (151 MHz, DMSO) 171.6 (C-6), 158.6 (C-4), 133.1 (C-2), 123.3 (C-2'), 120.3 (C-5'), 117.4 (C-5), 109.3 (C-4'), 108.3 (C-3'), 90.9 (C-3), 57.7 (C-10).

FT-IR (neat,  $\text{cm}^{-1}$ ): 3245, 3192, 3125, 3039, 2952, 2840, 1593, 1546, 1517, 1504, 1422, 1358, 1346, 1302, 1276, 1234, 1187, 1160, 1116, 1044, 1013, 974, 829, 810, 770, 740, 694, 667, 625, 612, 604, 587, 463.

$T_m$ : 250–265 °C (Decomposition).

HRMS-ESI ( $m/z$ ):  $[\text{M}+\text{H}]^+$  calculated for  $\text{C}_{10}\text{H}_{11}\text{N}_2\text{O}_2$  191.0815, found 191.0818.

$t_R$  (LC-MS Method): 7.01 min.

#### (*Z*)-*N*-[(5-Bromo-3-methoxy-2*H*-pyrrol-2-ylidene)methyl]-*N*-ethylethanamine (**10**)

Bromide **10** was synthesised according to a published procedure from Chawrai *et al.*(1)

In a 500 mL Schlenk flask under  $\text{N}_2$  atmosphere, *N,N*-diethylformamide (10.7 g, 106.2 mmol, 3.00 eq.) was dissolved in dry  $\text{CH}_2\text{Cl}_2$  (40 mL) and cooled to 0 °C. Phosphoryl bromide (25.4 g, 88.5 mmol, 2.50 eq.) was dissolved in dry  $\text{CH}_2\text{Cl}_2$  and slowly added to the diethylformamide solution at 0 °C via transfer cannula. The solution was stirred for 1 h at 0 °C, during which time the solution had turned yellow and a white solid precipitated. A solution of 4-methoxy-3-pyrrolin-2-one (4.00 g, 35.4 mmol, 1.00 eq.) in dry  $\text{CH}_2\text{Cl}_2$  (60 mL) was slowly added to the Vilsmeier reagent at 0 °C. After complete addition, the reaction was allowed to warm to 21 °C, stirred for 30 min at 21 °C and then heated for 3 h at 40 °C. Finally, the reaction was refluxed for 2 h at 50 °C. The reaction was quenched with ice water (400 mL), phases were separated and the aqueous phase adjusted to pH 7–8 with 1 M NaOH (*aq.*). The aqueous phase was then extracted with  $\text{CH}_2\text{Cl}_2$  (5 x 100 mL) and merged organic phases washed with brine (2 x 150 mL). Drying over  $\text{MgSO}_4$  and filtration provided the crude product as brown oil. Chromatography on silica with PE/EtOAc (80:20) + 1% TEA yielded the desired product (5.55 g, 21.4 mmol, 61%) as orange oil, which crystallised at –20 °C.

$\delta^1\text{H}$  (600 MHz,  $\text{CDCl}_3$ ) 6.99 (1 H, s, 6-H), 5.59 (1 H, s, 4-H), 4.12 (2 H, q,  $J = 7.1$  Hz, 8-H), 3.76 (3 H, s, 13-H), 3.39 (2 H, q,  $J = 7.2$  Hz, 10-H), 1.29 (6 H, q,  $J = 7.1$  Hz, 9-H, 11-H).

$\delta^{13}\text{C}$  (151 MHz,  $\text{CDCl}_3$ ) 165.5 (C-3), 138.7 (C-6), 133.8 (C-5), 120.9 (C-2), 96.6 (C-4), 58.1 (C-13), 51.2 (C-10), 44.7 (C-8), 14.7 (C-11), 12.6 (C-9).

FT-IR (neat,  $\text{cm}^{-1}$ ): 2974, 2938, 2876, 2866, 1630, 1525, 1486, 1459, 1448, 1406, 1382, 1325, 1275, 1185, 1106, 1076, 1058, 992, 944, 908, 858, 813, 801, 775, 719, 683, 676, 642, 565, 525, 478.



T<sub>m</sub>: 43.3–45.0 °C

HRMS-ESI (m/z): [M+H]<sup>+</sup> calculated for C<sub>10</sub>H<sub>16</sub>BrN<sub>2</sub>O 259.0441, found 259.0443.

#### **tert-Butyl 5'-formyl-4'-methoxy-1H,1'H-[2,2'-bipyrrole]-1-carboxylate (Boc-MBC, S1)**

Boc-protected MBC was synthesised according to an original procedure from Aldrich *et al.* and modified by Klein *et al.* (2, 3) In a 500 mL Schlenk flask under N<sub>2</sub> atmosphere, tetrakis(triphenylphosphine)palladium(0) (1.18 g, 1.02 mmol, 0.05 eq.) was dissolved in degassed toluene (11 mL). A solution of bromide **10** (5.30 g, 20.5 mmol, 1.00 eq.) and *N*-Boc-pyrrole-2-boronic acid MIDA-Ester (9.88 g, 30.7 mmol, 1.50 eq.) in degassed 1,4-dioxane/water (9:1, 180 mL) were added to the Pd catalyst. After addition of Na<sub>2</sub>CO<sub>3</sub> (6.51 g, 61.4 mmol, 3.00 eq.) the reaction was heated to 90 °C for 1 h. Anhydrous K<sub>3</sub>PO<sub>4</sub> (8.68 g, 40.9 mmol, 2.00 eq.) was supplemented to the reaction and after additional 90 min of reflux, a second batch of Pd catalyst (1.18 g, 1.02 mmol, 0.05 eq.) was added. After 5 h of reflux, the solution was cooled to ambient temperature and ice water (400 mL) was added. The pH was adjusted with 30 mL 2 M HCl, followed by extraction with CH<sub>2</sub>Cl<sub>2</sub> (3 x 150 mL). Merged organic phases were dried over MgSO<sub>4</sub>, filtered and the solvent removed *in vacuo*. Purification on silica with PE/EtOAc (80:20) provided the product (2.57 g, 8.86 mmol, 43%) as beige solid.

δ<sup>1</sup>H (600 MHz, CDCl<sub>3</sub>) 10.70 (1 H, brs, 1'-H), 9.54 (1 H, brs, 9'-H), 7.33 (1 H, dd, *J* = 3.4 Hz, *J* = 1.8 Hz, 5-H), 6.67 (1 H, dd, *J* = 3.6 Hz, *J* = 1.8 Hz, 3-H), 6.25 (1 H, t, *J* = 3.5 Hz, 4-H), 6.08 (1 H, d, *J* = 2.7 Hz, 3'-H), 3.89 (3 H, s, 7'-H), 1.62 (9 H, s, 10-H, 11-H, 12-H).

δ<sup>13</sup>C (151 MHz, CDCl<sub>3</sub>) 174.5 (C-8'), 157.8 (C-4'), 149.9 (C-6), 130.3 (C-2'), 126.2 (C-2), 124.7 (C-5), 118.4 (C-5'), 117.0 (C-3), 111.6 (C-4), 94.9 (C-3'), 85.9 (C-9), 58.1 (C-7'), 28.1 (C-10, C-11, C-12).

FT-IR (neat, cm<sup>-1</sup>): 3207, 3156, 3111, 3013, 2993, 2977, 2936, 2857, 2831, 1744, 1597, 1546, 1504, 1455, 1445, 1389, 1366, 1304, 1284, 1255, 1230, 1189, 1170, 1160, 1138, 1082, 1067, 1041, 1015, 918, 878, 843, 821, 768, 732, 692, 639, 585, 571, 497.

T<sub>m</sub>: 145–150 °C (Decomposition)

HRMS-ESI (m/z): [M+H]<sup>+</sup> calculated for C<sub>16</sub>H<sub>21</sub>N<sub>2</sub>O<sub>4</sub> 291.1339, found 291.1344.

## **9. References**

- (1) S. R. Chawrai, N. R. Williamson, G. P. Salmond and F. J. Leeper, *Chem. Commun.*, 2008, (16), 1862-1864.
- (2) L. N. Aldrich, E. S. Dawson and C. W. Lindsley, *Org. Lett.*, 2010, **12**(5), 1048-1051.
- (3) A. Domröse, A. S. Klein, J. Hage-Hülsmann, S. Thies, V. Svensson, T. Classen, J. Pietruszka, K.-E. Jaeger, T. Drepper and A. Loeschcke, *Front. Microbiol.*, 2015, **6**:972.

## 10. NMR Spectra

### 4-Methoxy-1*H*,1'*H*-[2,2'-bipyrrole]-5-carbaldehyde (**3a**)

<sup>1</sup>H NMR, 600 MHz, DMSO-*d*<sub>6</sub>

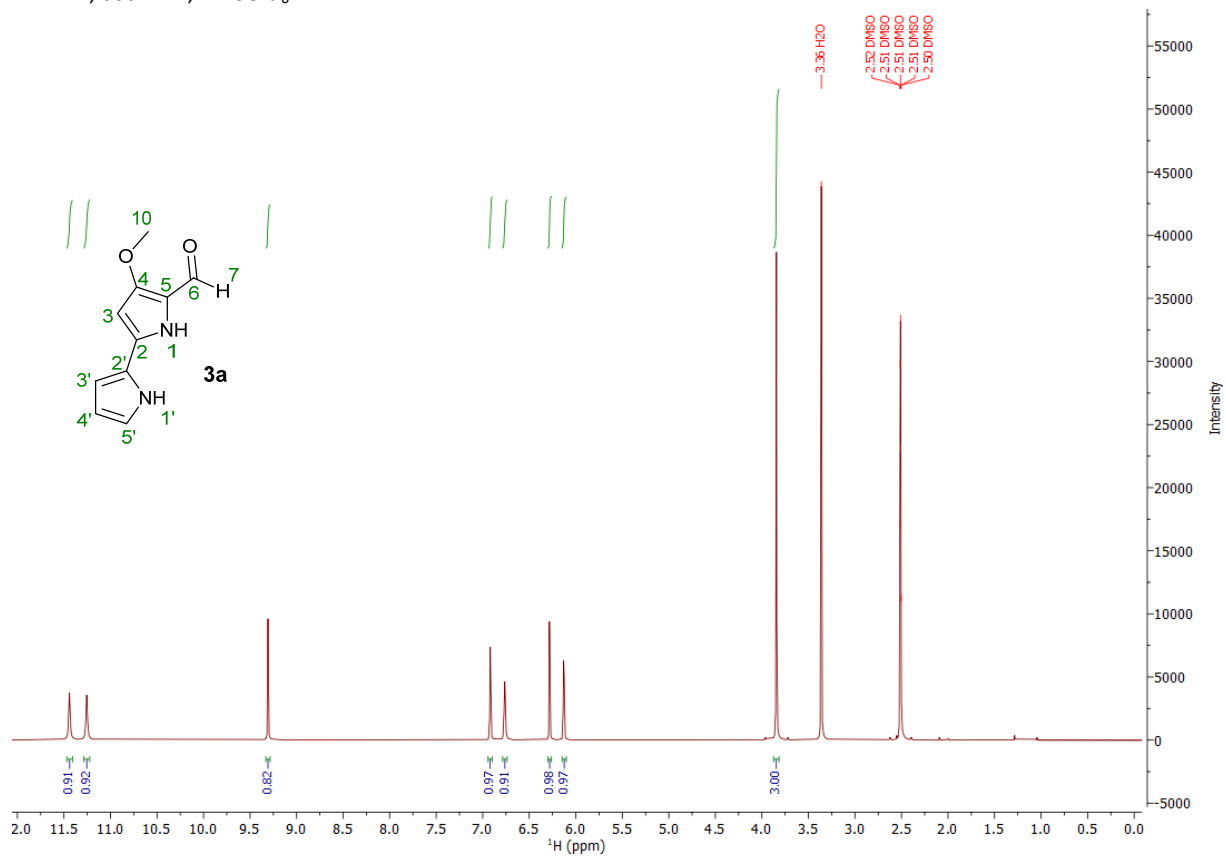

<sup>13</sup>C NMR, 151 MHz, DMSO-*d*<sub>6</sub>

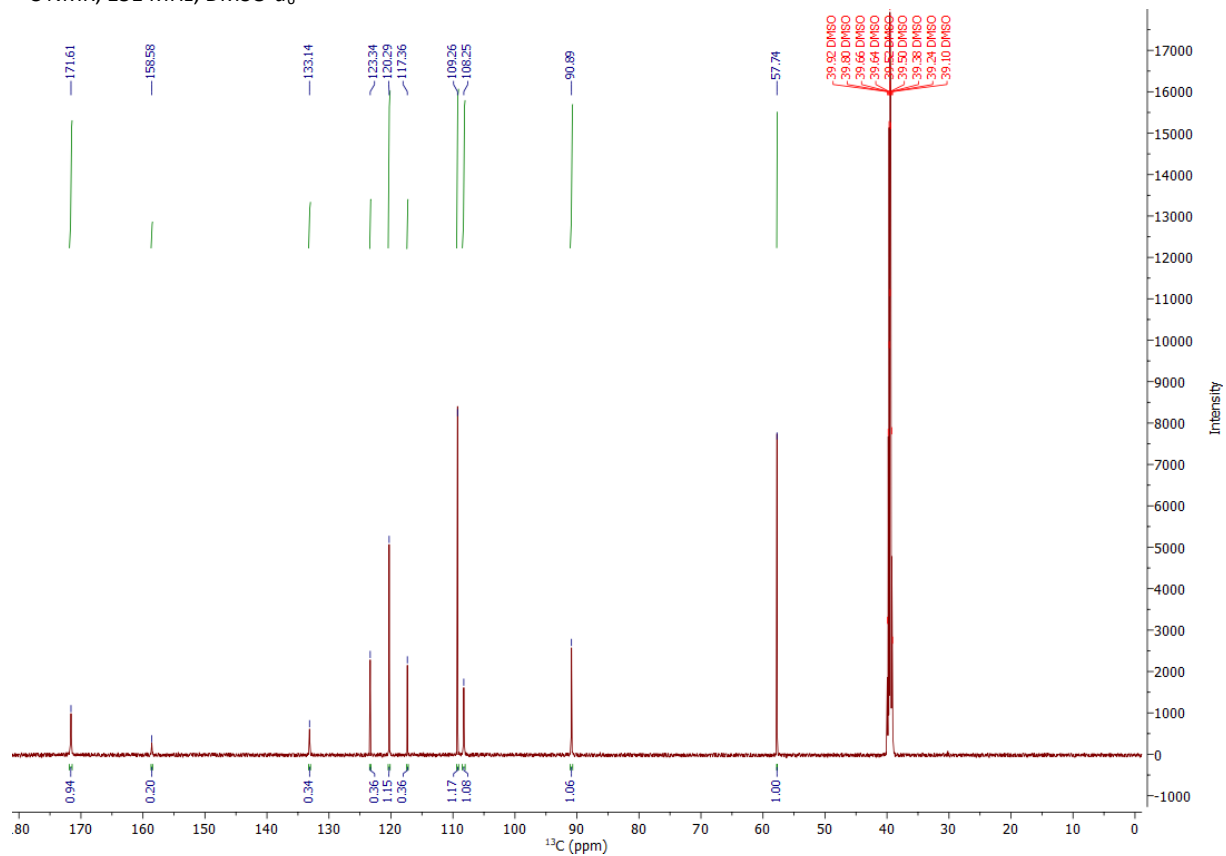

### 4-Methoxy-5'-methyl-1*H*,1'*H*-[2,2'-bipyrrrole]-5-carbaldehyde (**3b**)

<sup>1</sup>H NMR, 600 MHz, DMSO-*d*<sub>6</sub>

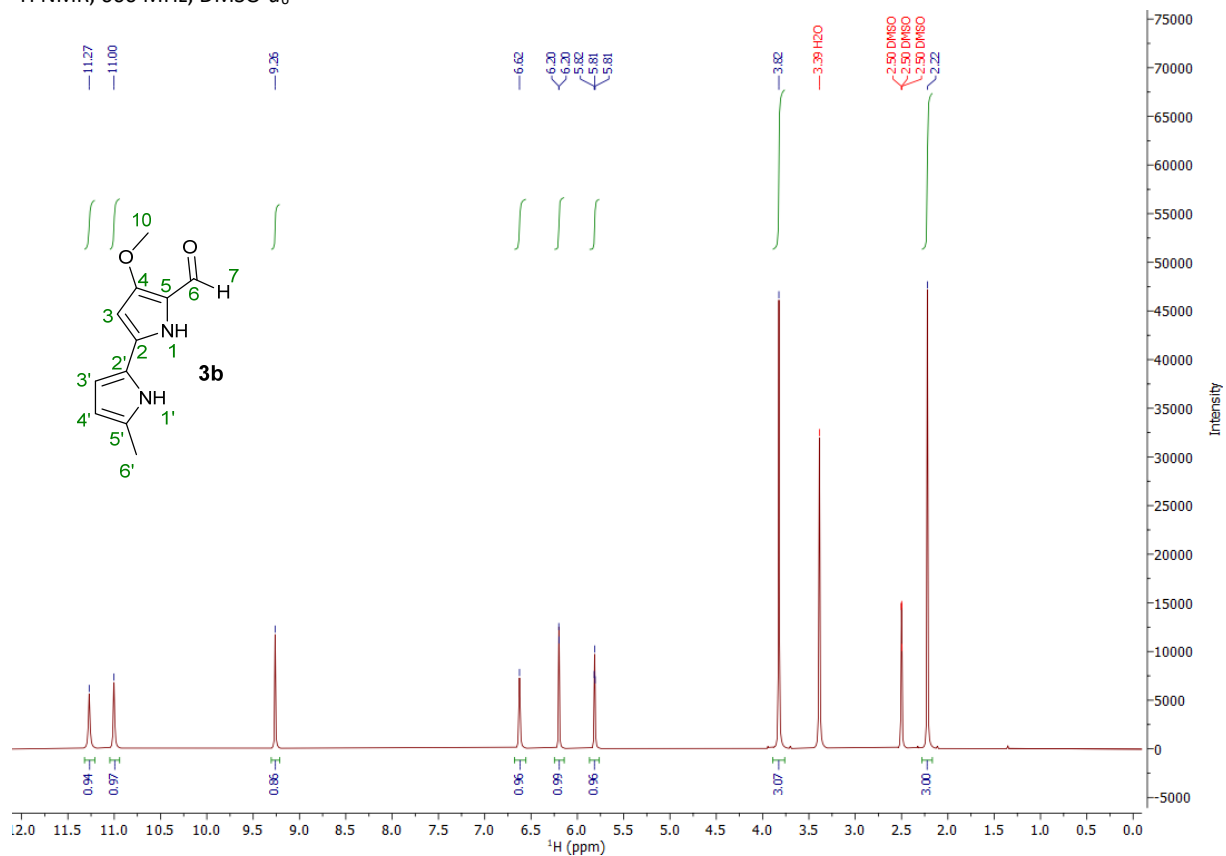

<sup>13</sup>C NMR, 151 MHz, DMSO-*d*<sub>6</sub>

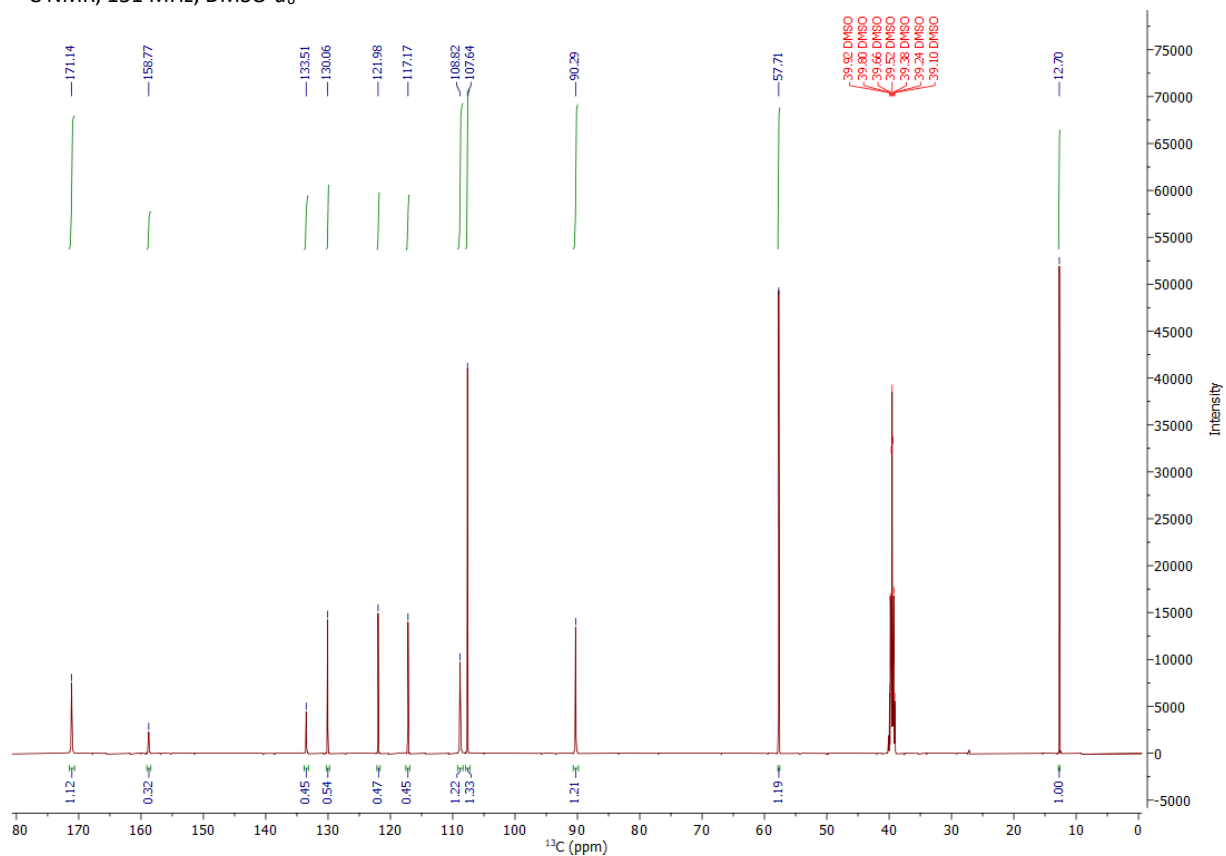

### 5'-Ethyl-4-methoxy-1*H*,1'*H*-[2,2'-bipyrrole]-5-carbaldehyde (**3c**)

<sup>1</sup>H NMR, 300 MHz, DMSO-*d*<sub>6</sub>

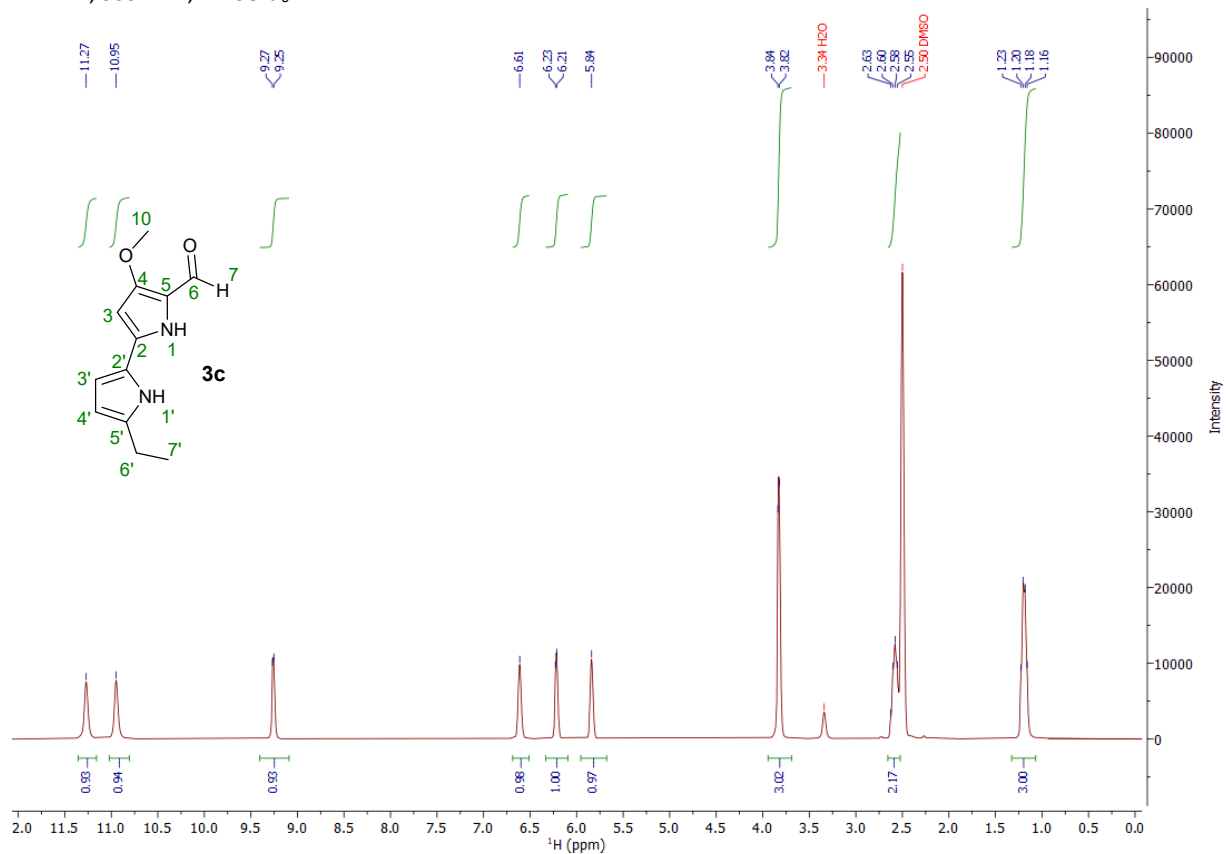

<sup>13</sup>C NMR, 76 MHz, DMSO-*d*<sub>6</sub>

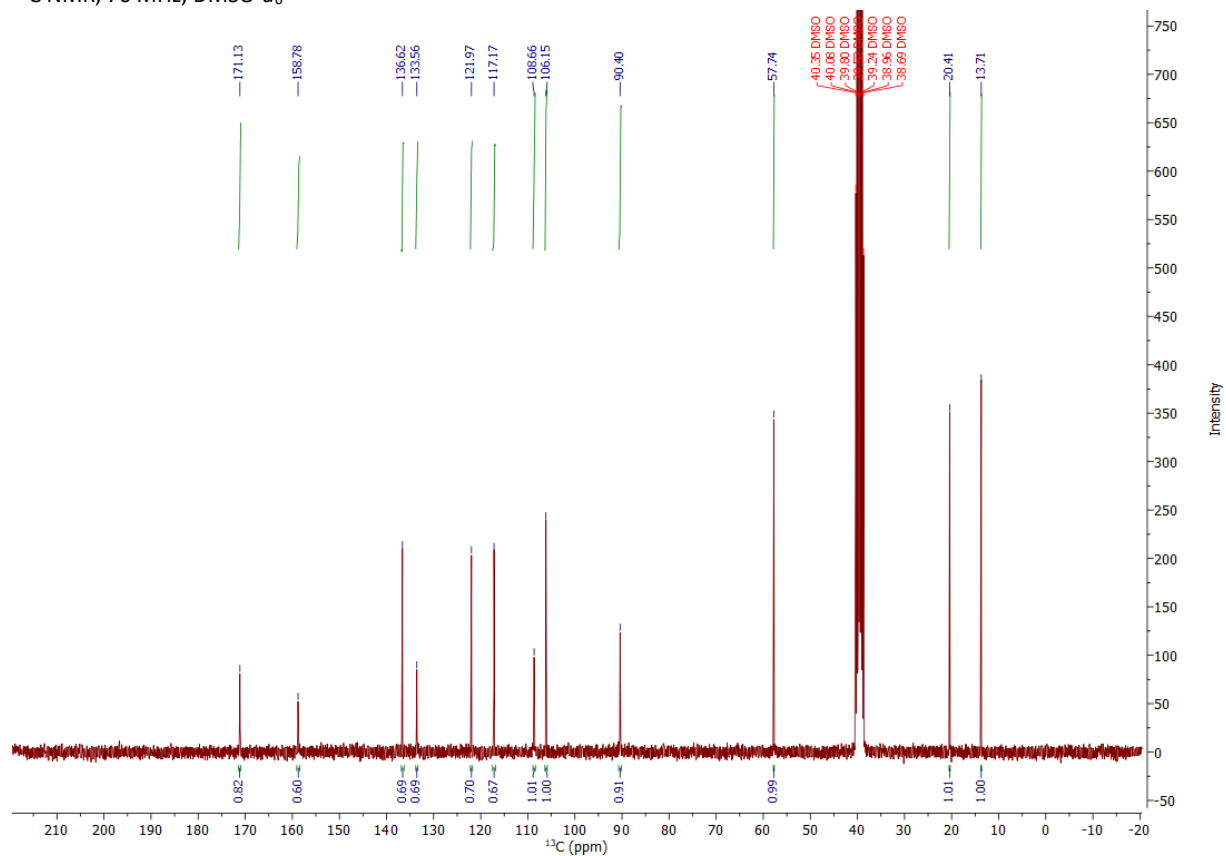

### 4-Methoxy-5'-propyl-1*H*,1'*H*-[2,2'-bipyrrole]-5-carbaldehyde (**3d**)

<sup>1</sup>H NMR, 600 MHz, DMSO-*d*<sub>6</sub>

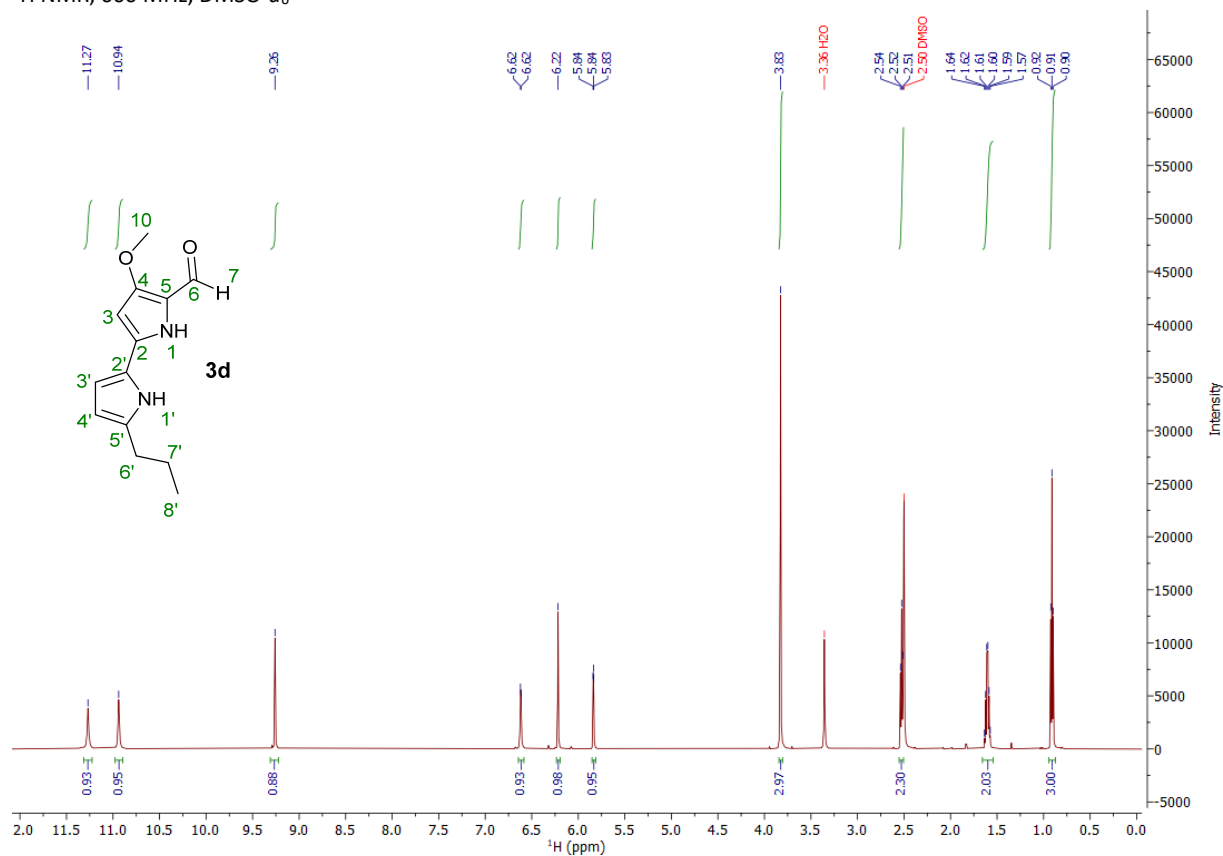

<sup>13</sup>C NMR, 151 MHz, DMSO-*d*<sub>6</sub>

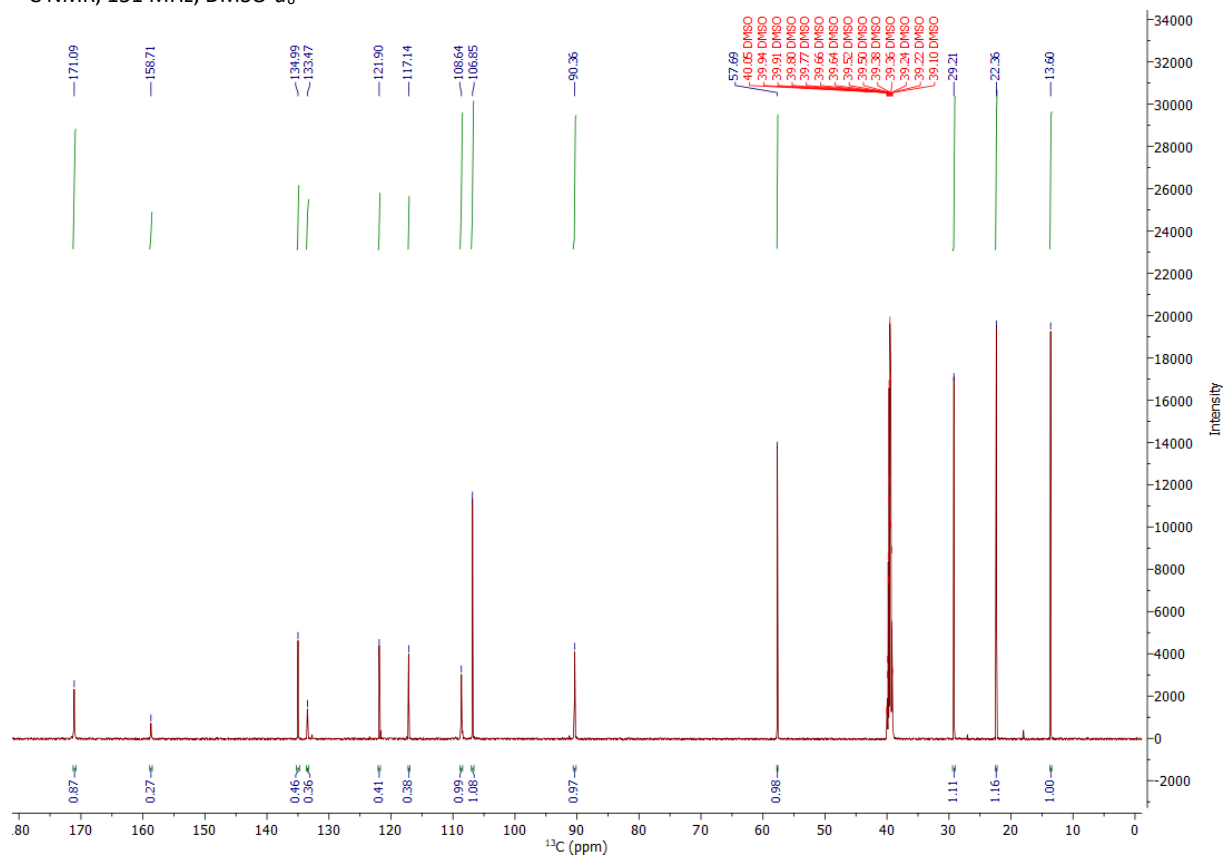

### 5'-Butyl-4-methoxy-1*H*,1'*H*-[2,2'-bipyrrole]-5-carbaldehyde (**3e**)

<sup>1</sup>H NMR, 300 MHz, DMSO-*d*<sub>6</sub>

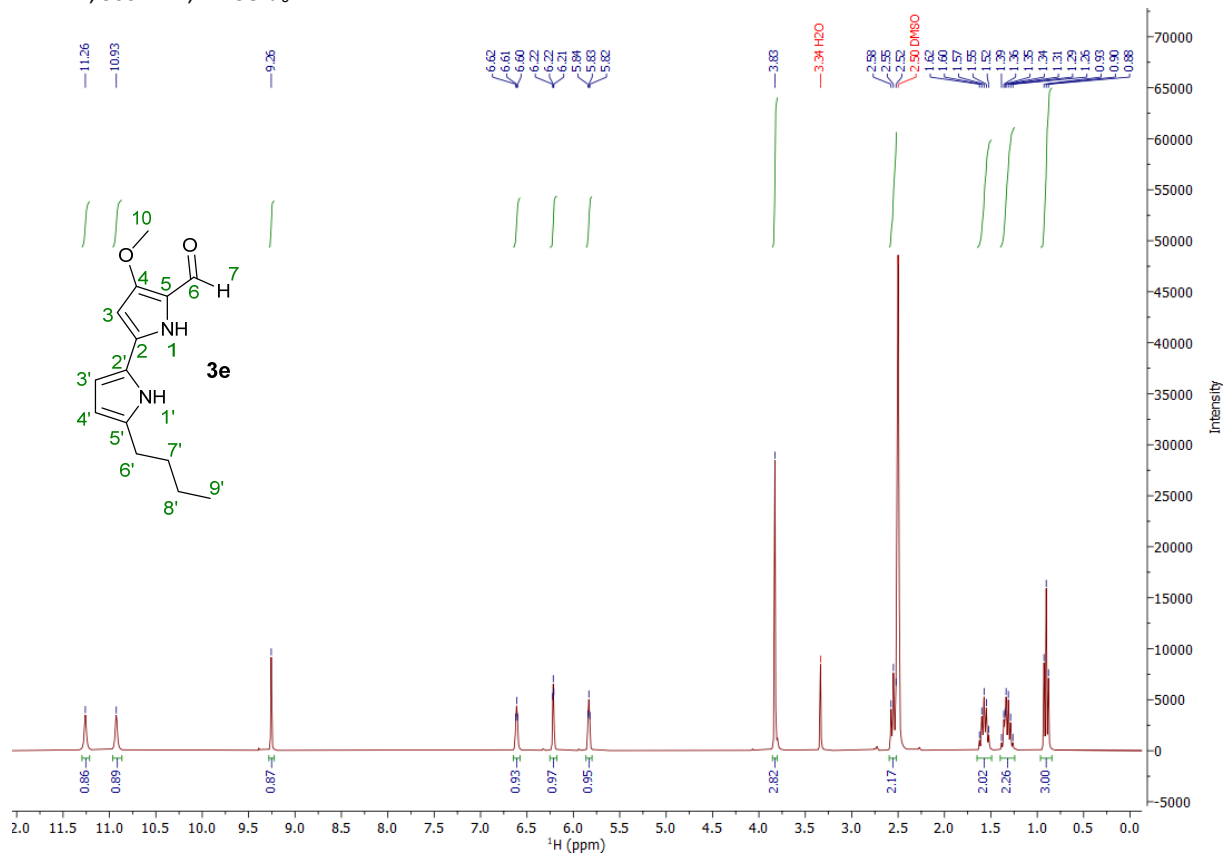

<sup>13</sup>C NMR, 76 MHz, DMSO-*d*<sub>6</sub>

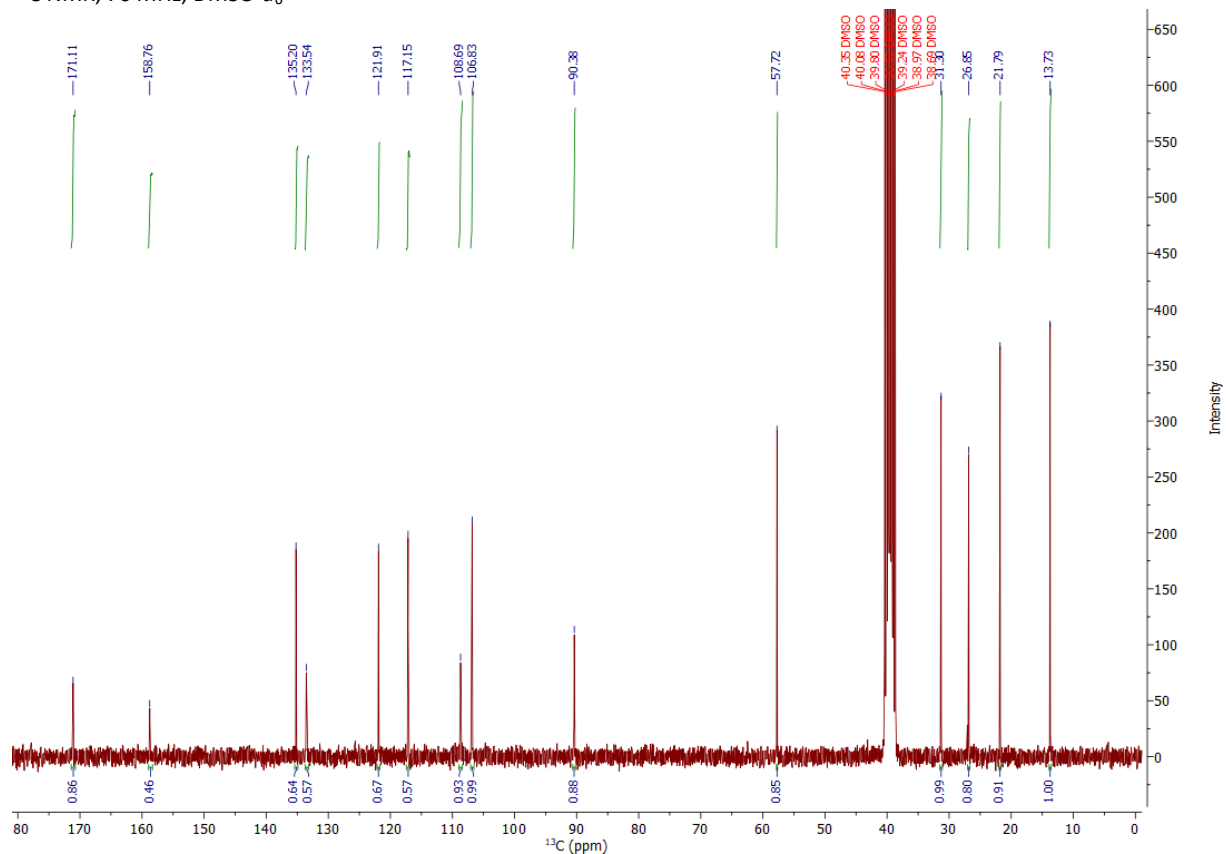

### 4-Methoxy-5'-pentyl-1*H*,1'*H*-[2,2'-bipyrrole]-5-carbaldehyde (**3f**)

<sup>1</sup>H NMR, 600 MHz, DMSO-*d*<sub>6</sub>

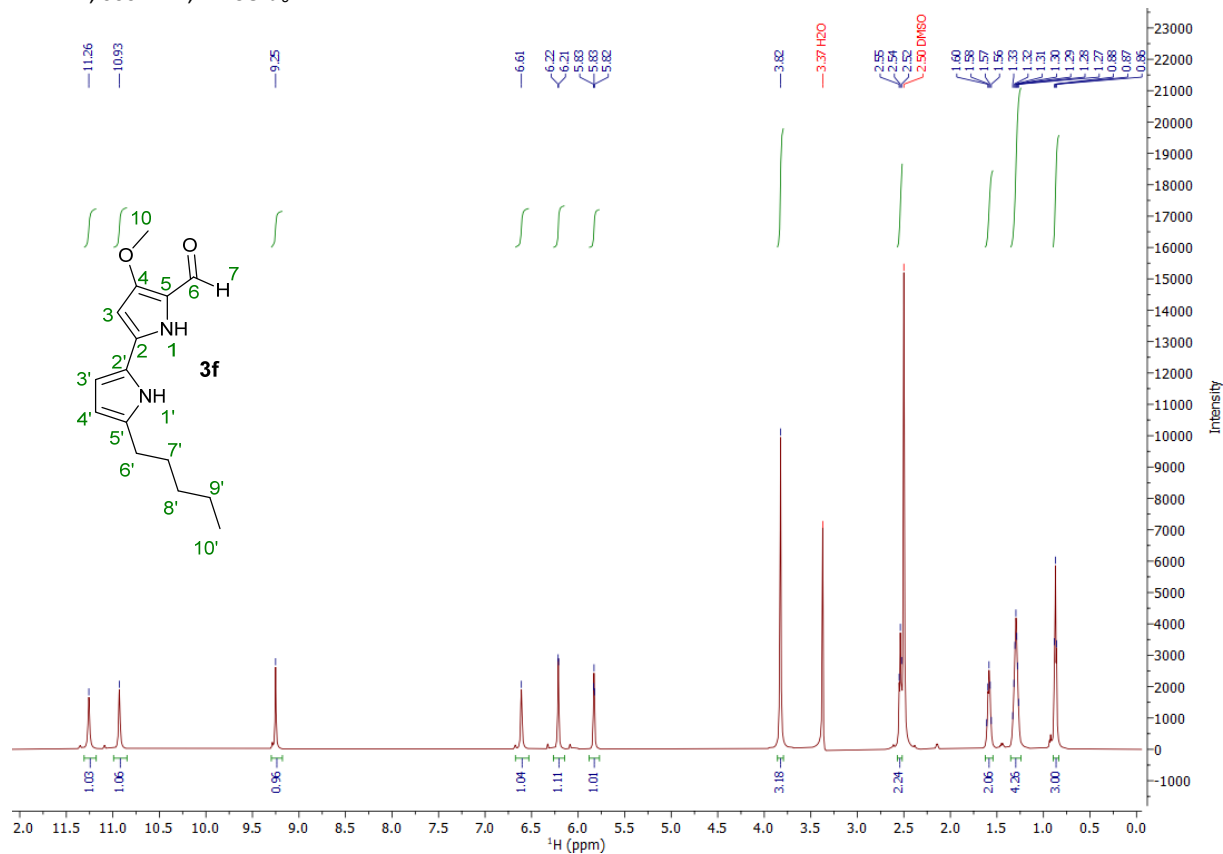

<sup>13</sup>C NMR, 151 MHz, DMSO-*d*<sub>6</sub>

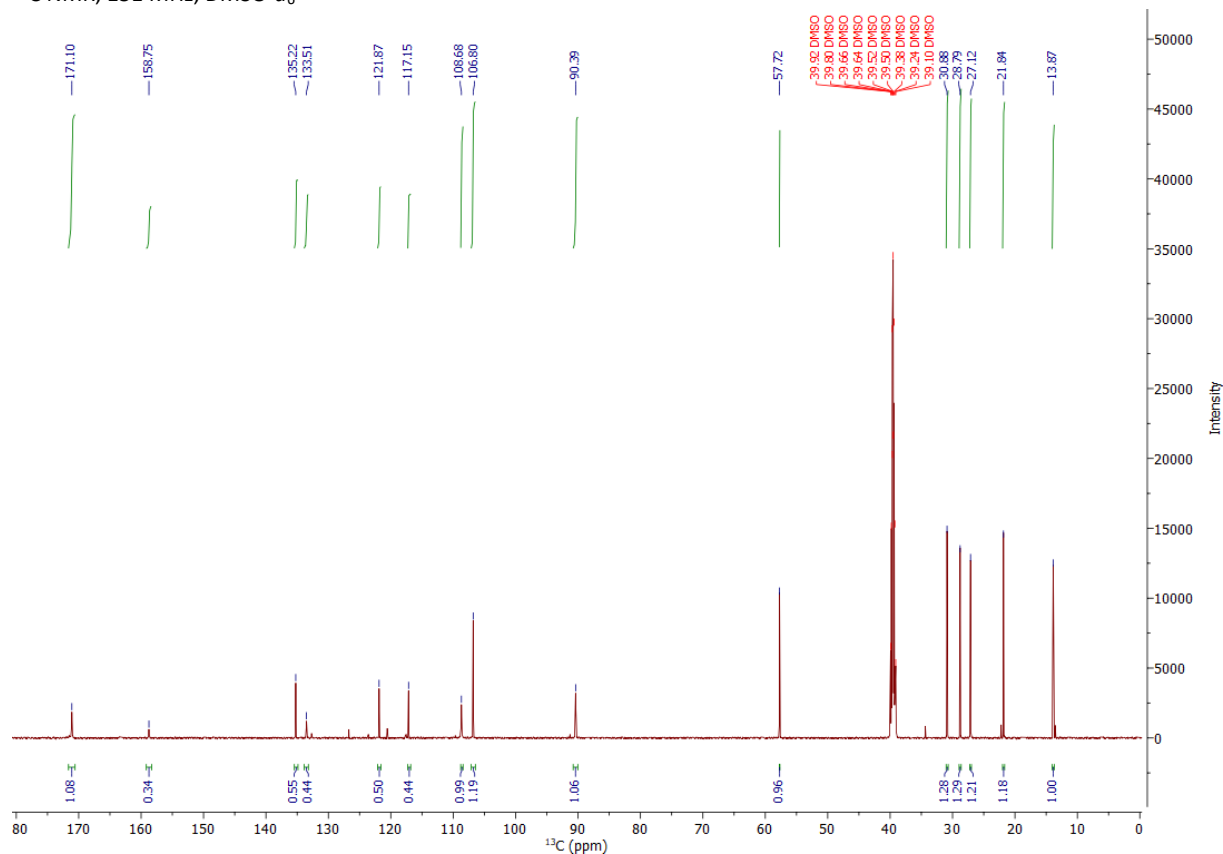

### 5'-Hexyl-4-methoxy-1*H*,1'*H*-[2,2'-bipyrrole]-5-carbaldehyde (**3g**)

<sup>1</sup>H NMR, 600 MHz, DMSO-*d*<sub>6</sub>

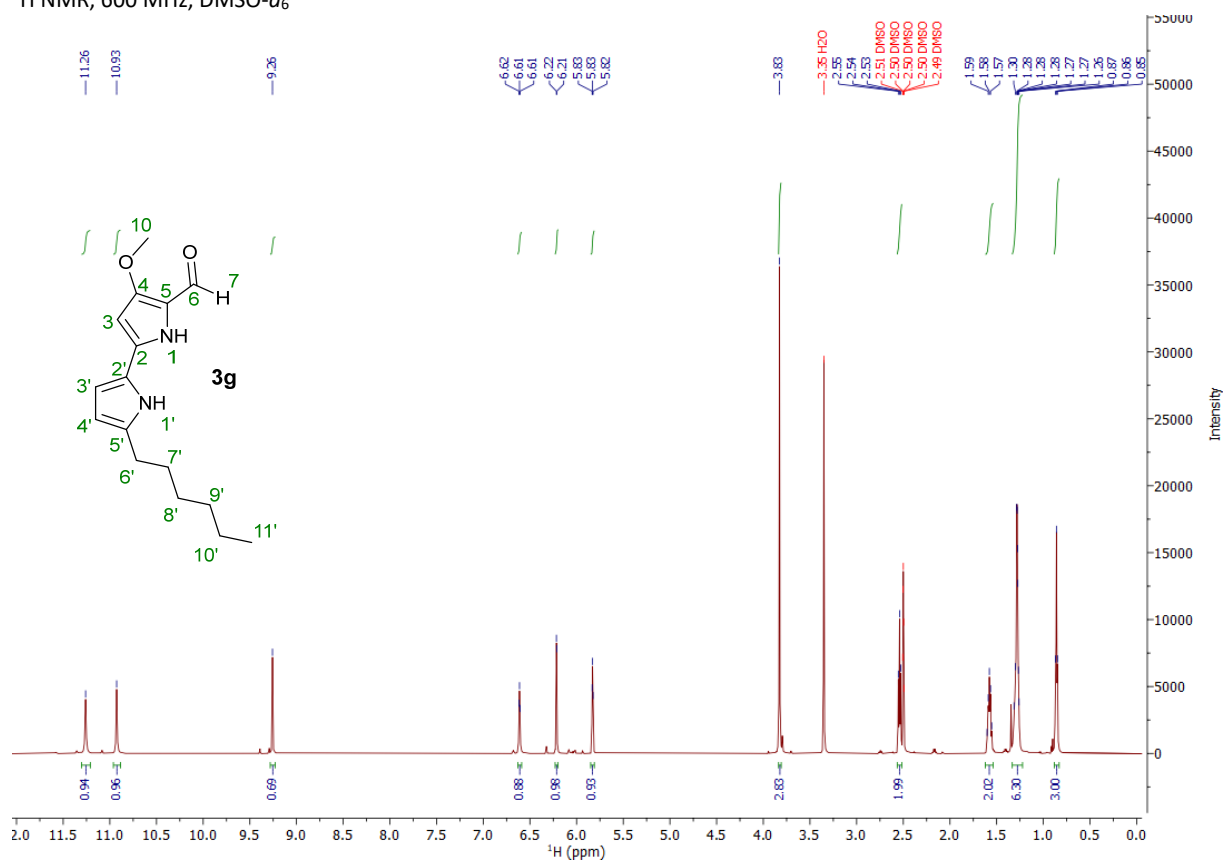

<sup>13</sup>C NMR, 151 MHz, DMSO-*d*<sub>6</sub>

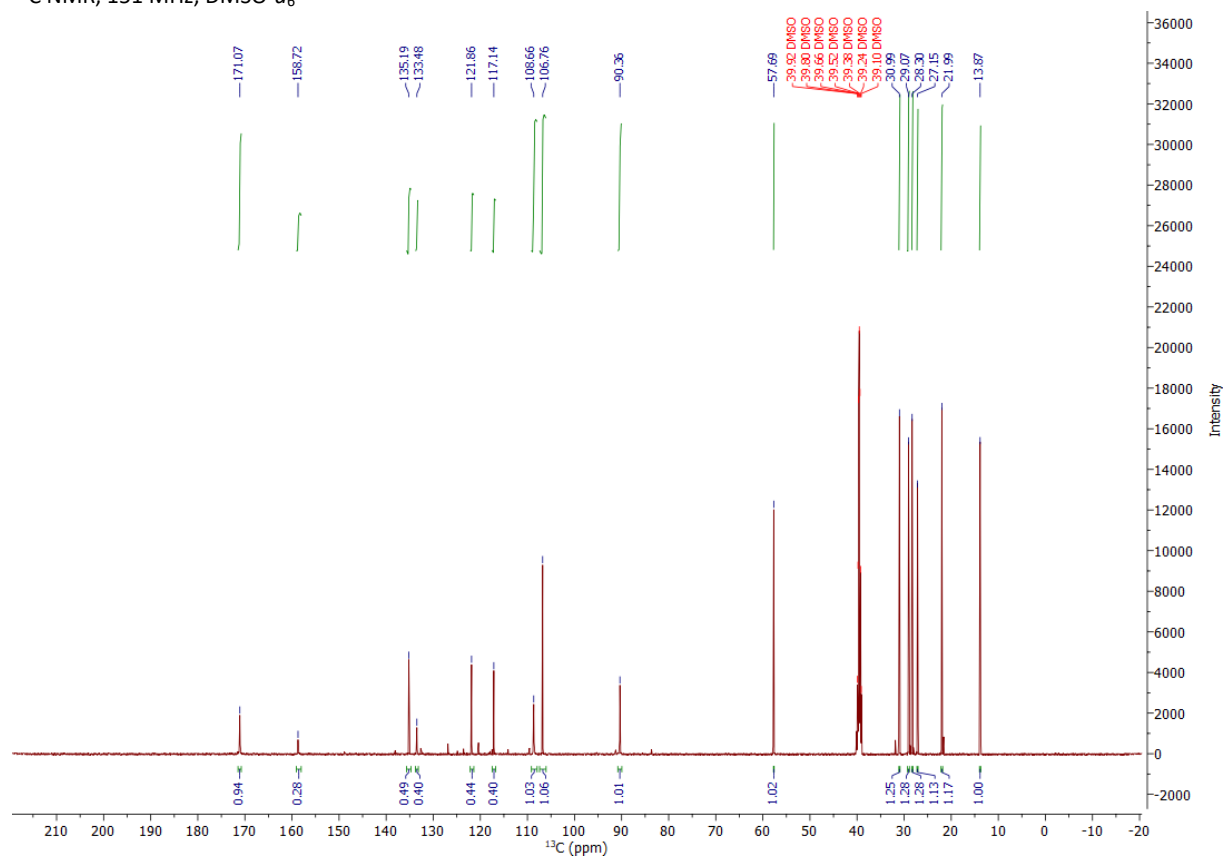



### 2-Methyl-3-pentyl-1H-pyrrole (4a)

$^1\text{H}$  NMR, 600 MHz,  $\text{CDCl}_3$

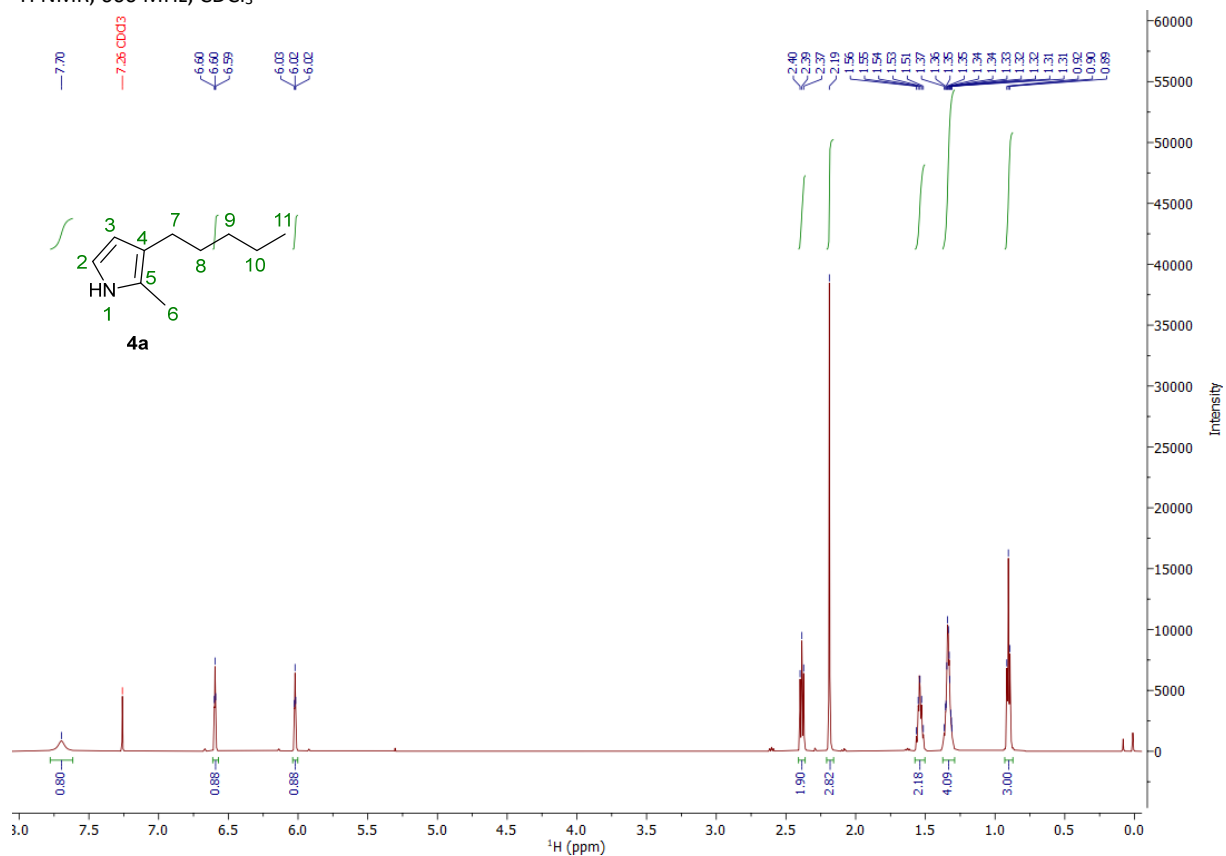

$^{13}\text{C}$  NMR, 151 MHz,  $\text{CDCl}_3$

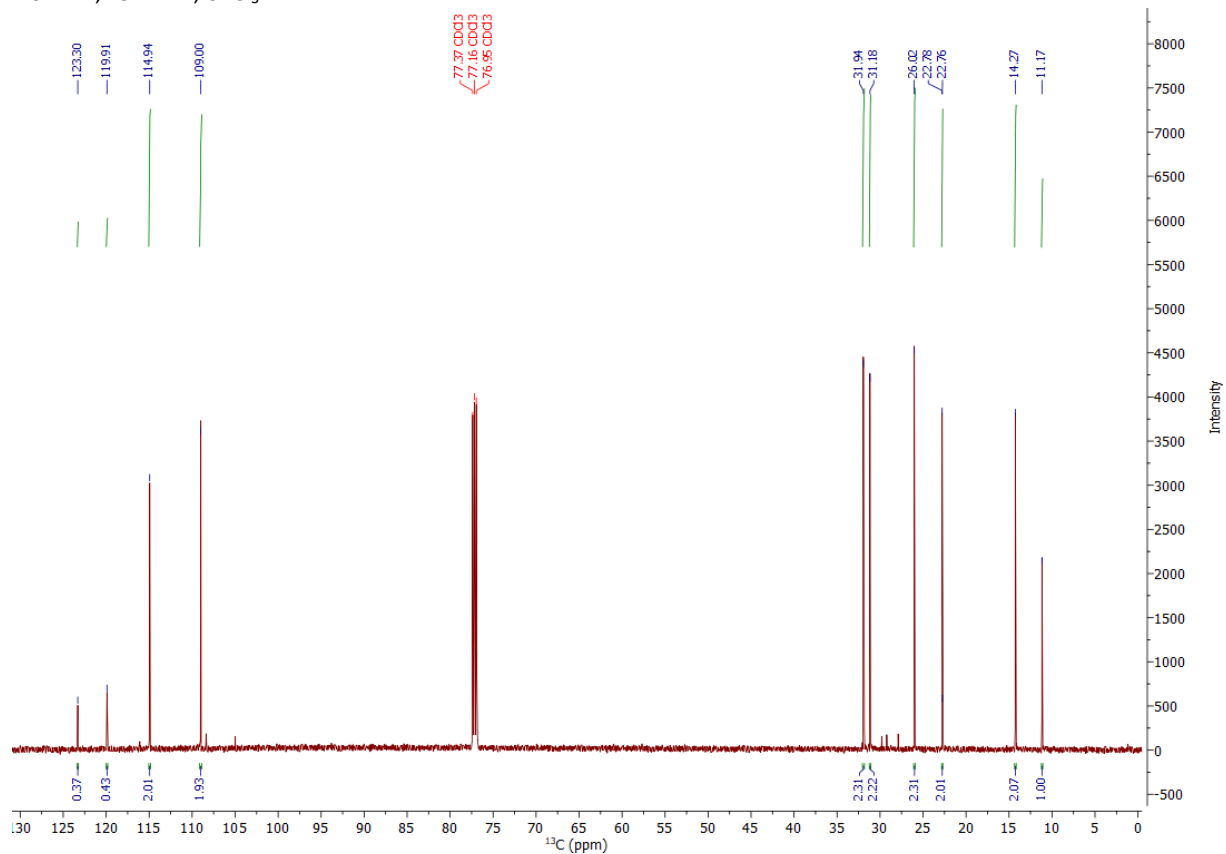

### 2-Methyl-3-propyl-1H-pyrrole (4b)

$^1\text{H}$  NMR, 600 MHz,  $\text{CDCl}_3$

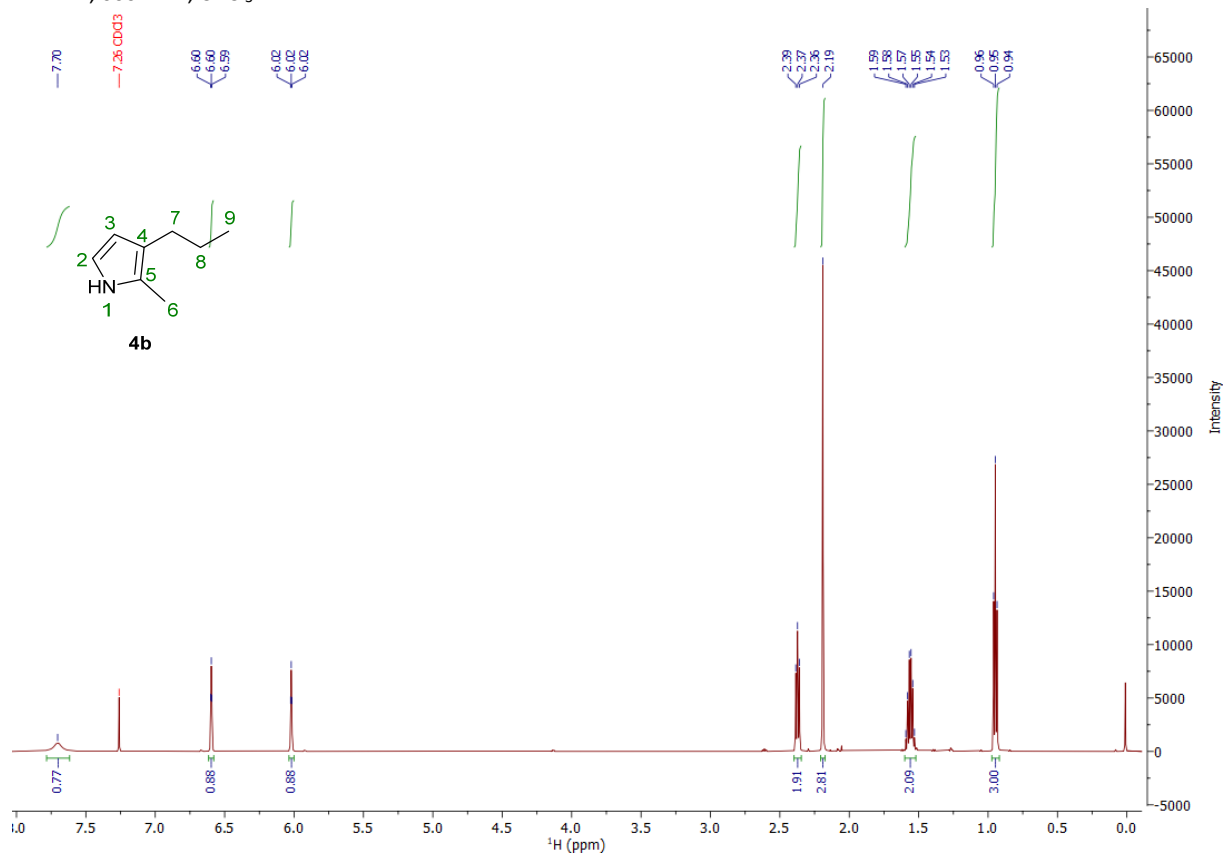

$^{13}\text{C}$  NMR, 151 MHz,  $\text{CDCl}_3$

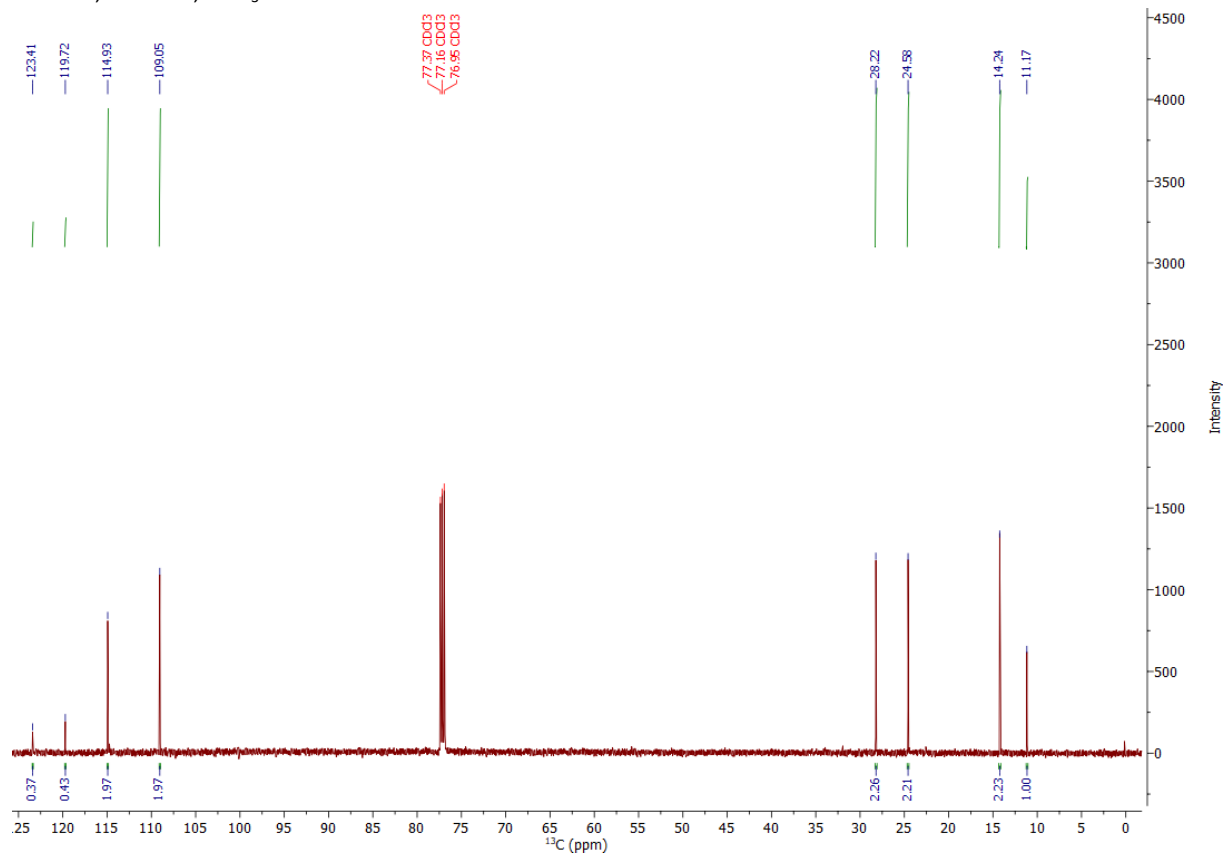

### 3-Heptyl-2-methyl-1H-pyrrole (4c)

$^1\text{H}$  NMR, 600 MHz,  $\text{CDCl}_3$

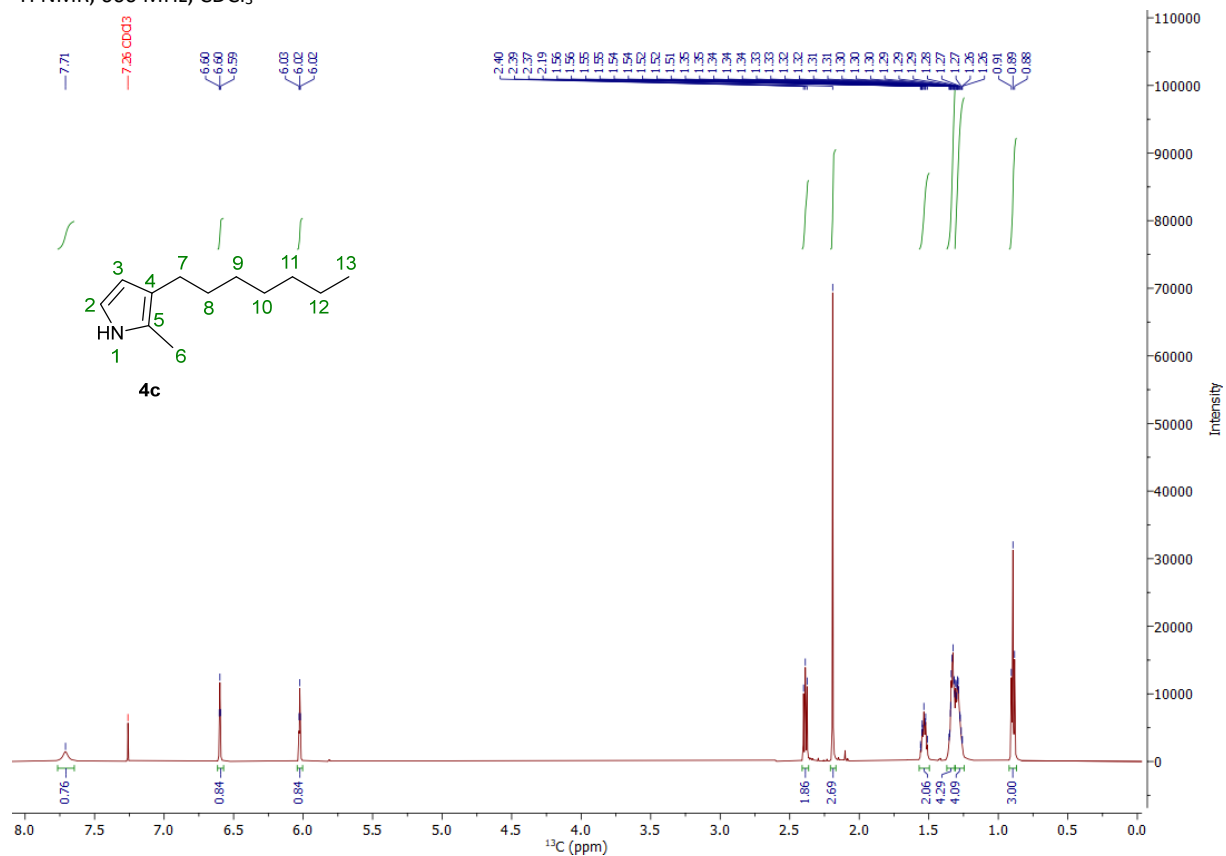

$^{13}\text{C}$  NMR, 151 MHz,  $\text{CDCl}_3$

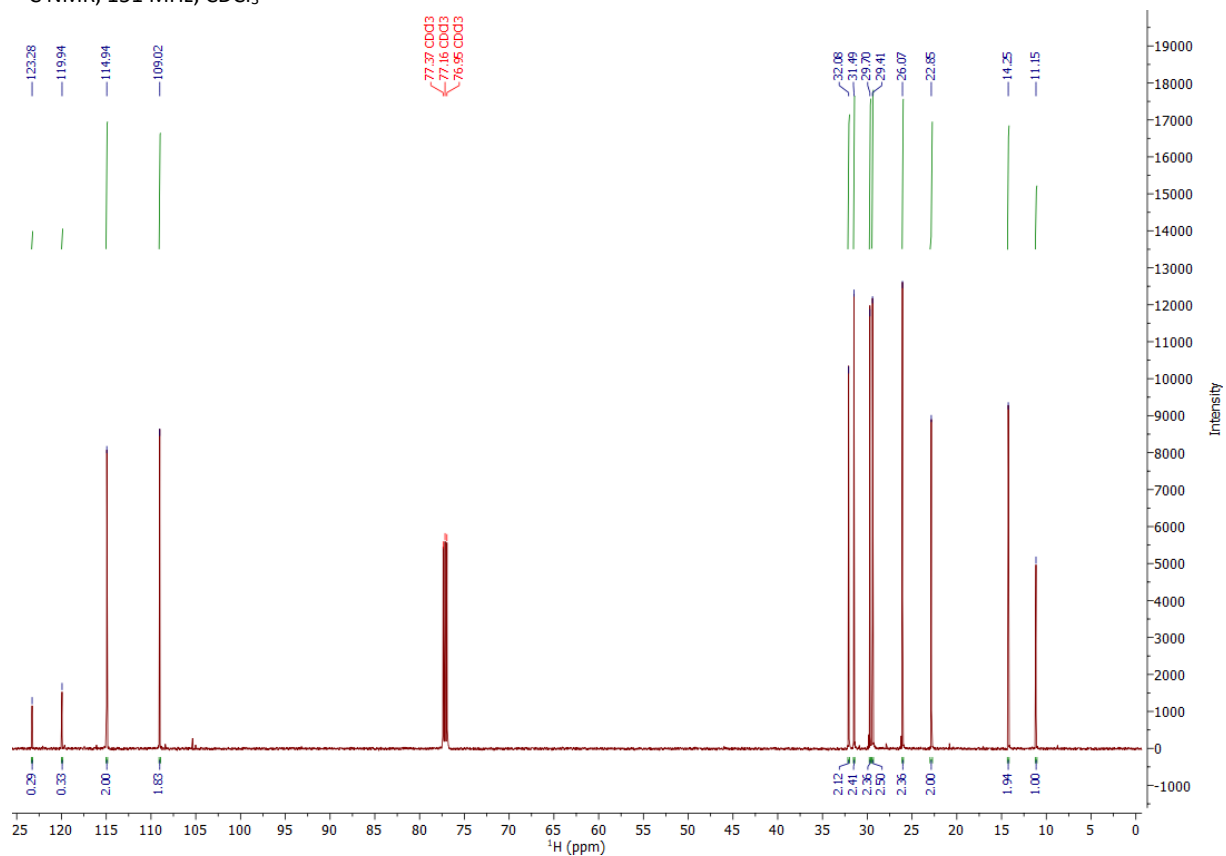

**(E/Z)-Octan-2-one oxime (8a)**

$^1\text{H}$  NMR, 600 MHz,  $\text{CDCl}_3$

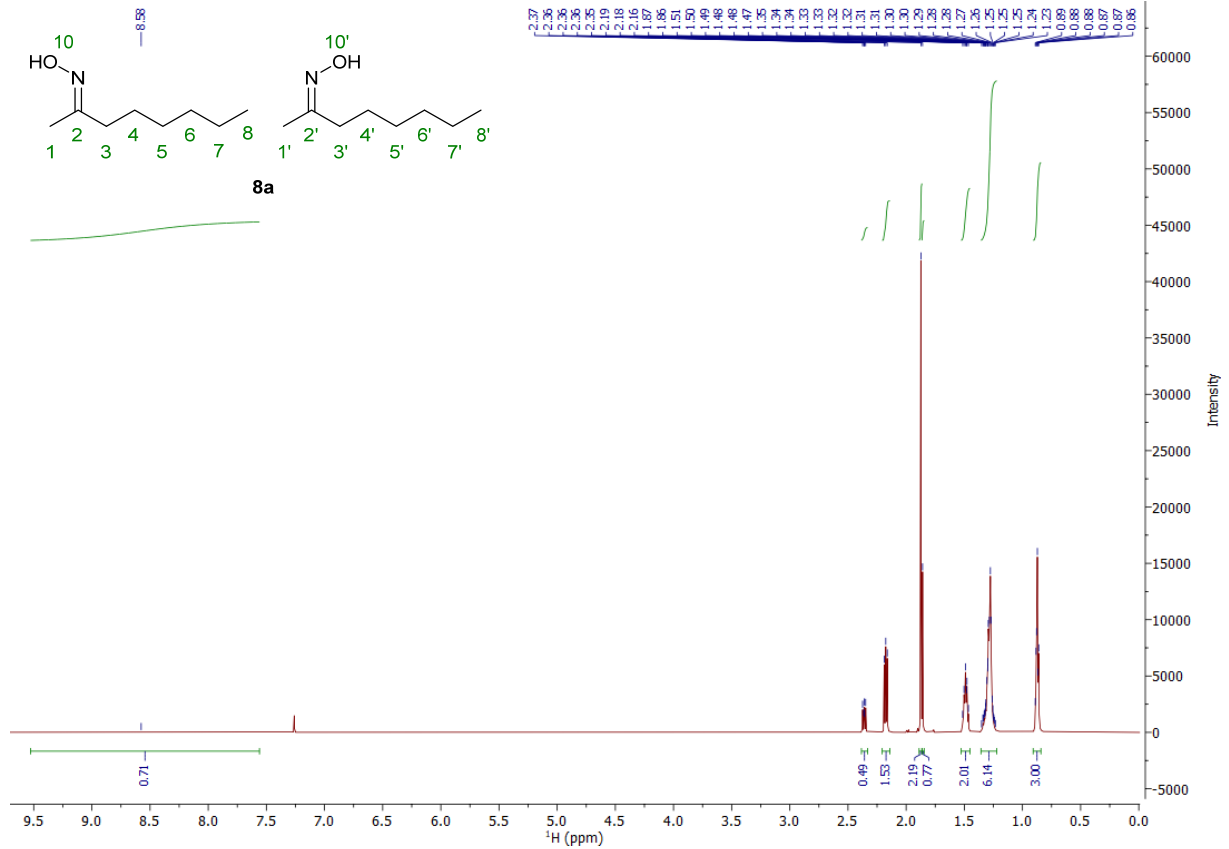

$^{13}\text{C}$  NMR, 151 MHz,  $\text{CDCl}_3$

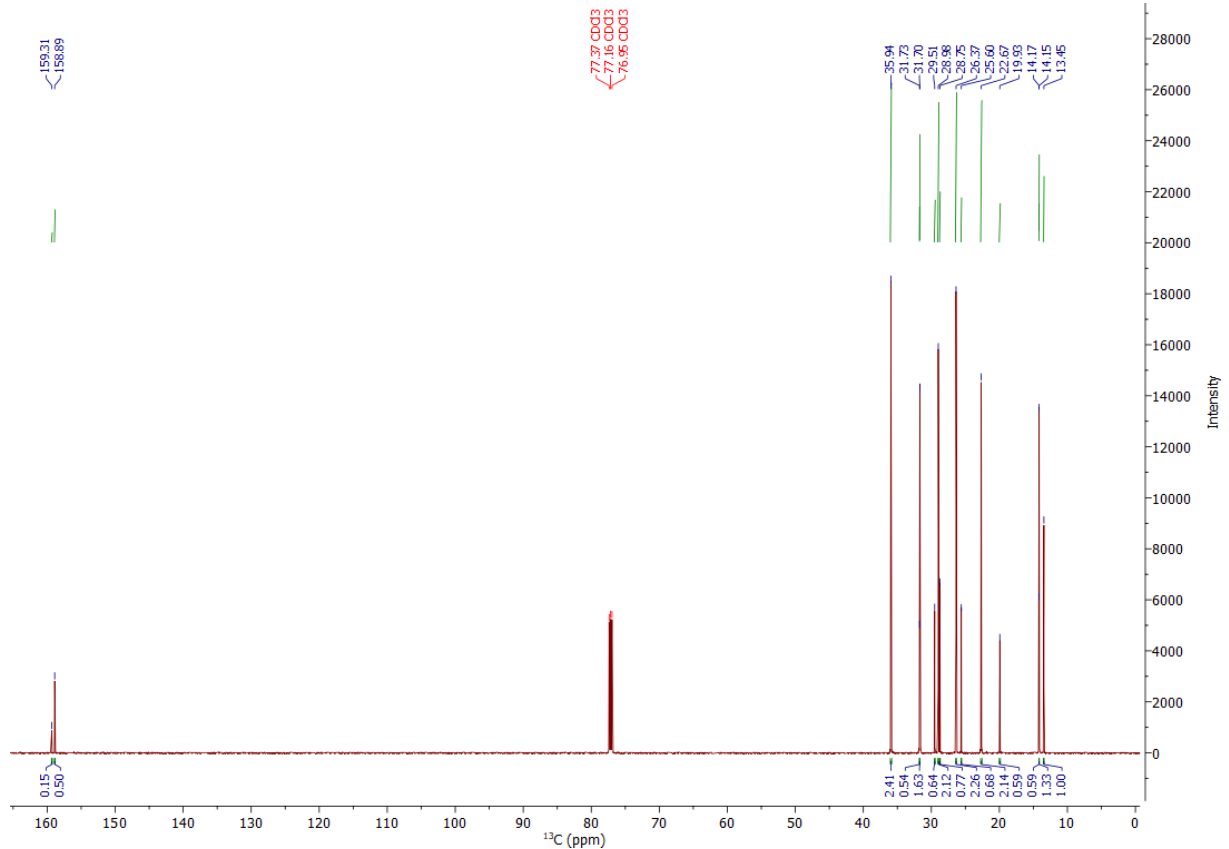

**(E/Z)-Hexan-2-one oxime (8b)**

$^1\text{H}$  NMR, 600 MHz,  $\text{CDCl}_3$

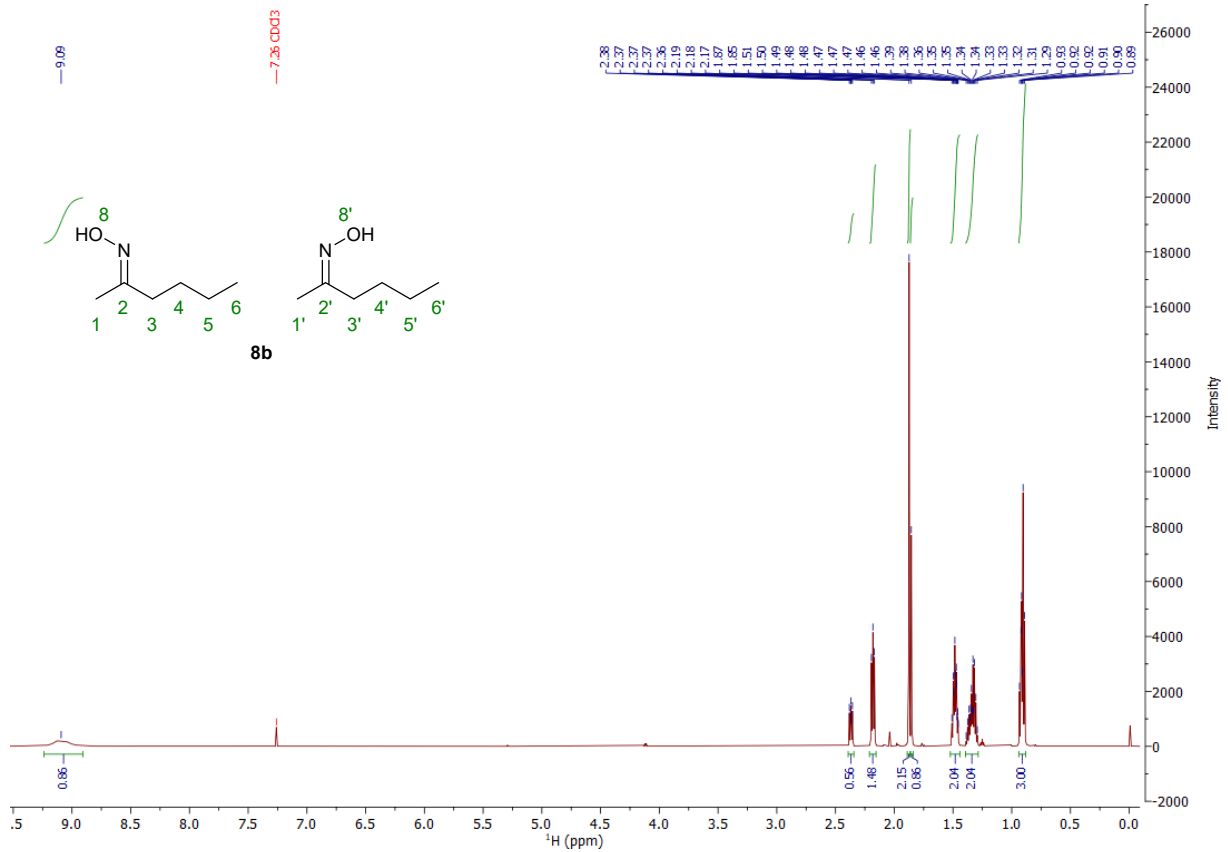

$^{13}\text{C}$  NMR, 151 MHz,  $\text{CDCl}_3$

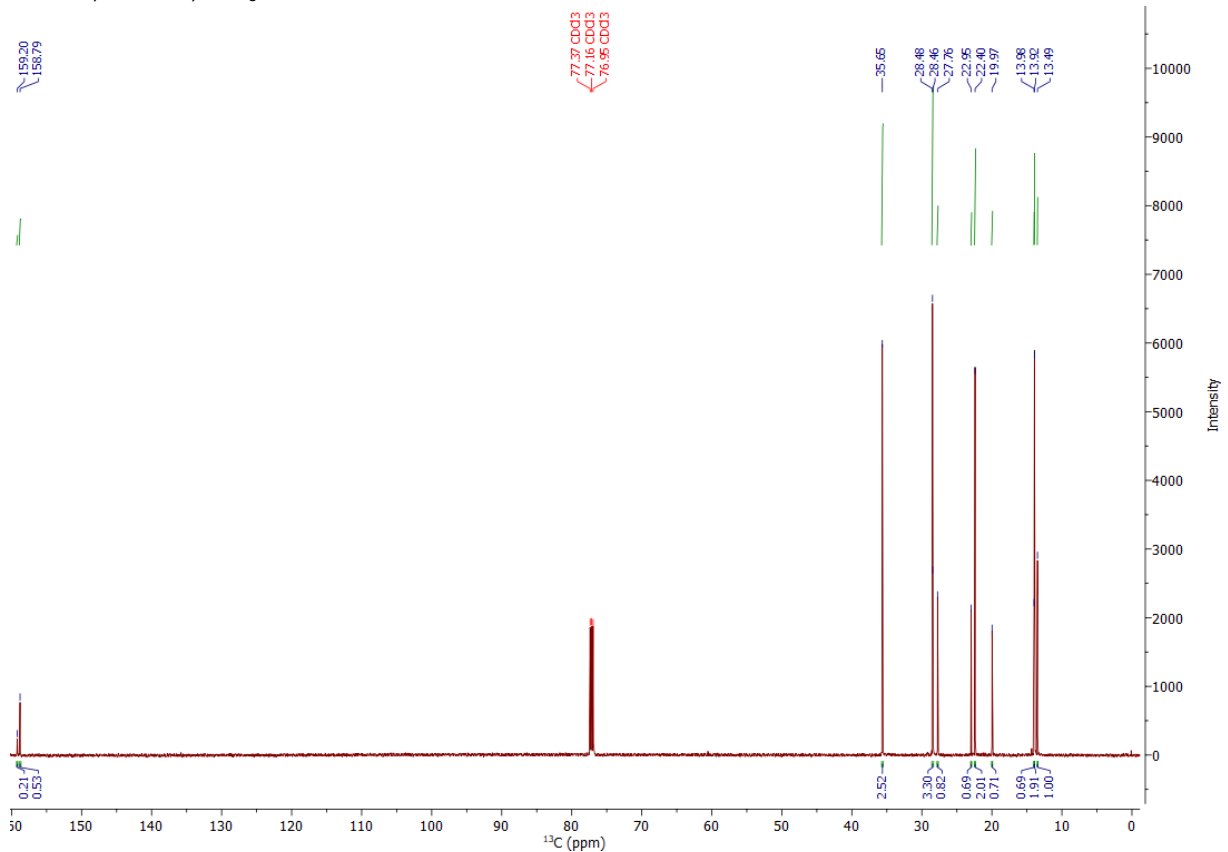

**(E/Z)-Decan-2-one oxime (8c)**

$^1\text{H}$  NMR, 600 MHz,  $\text{CDCl}_3$

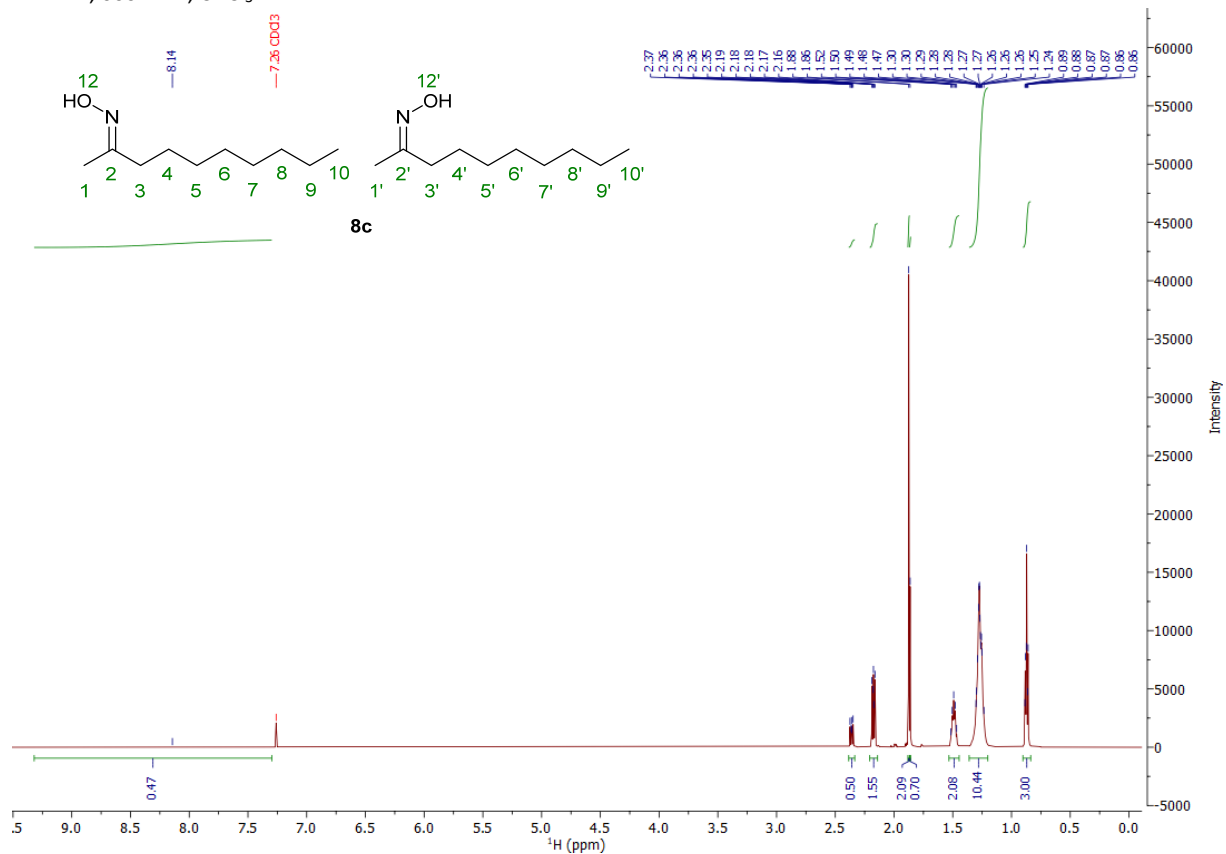

$^{13}\text{C}$  NMR, 151 MHz,  $\text{CDCl}_3$

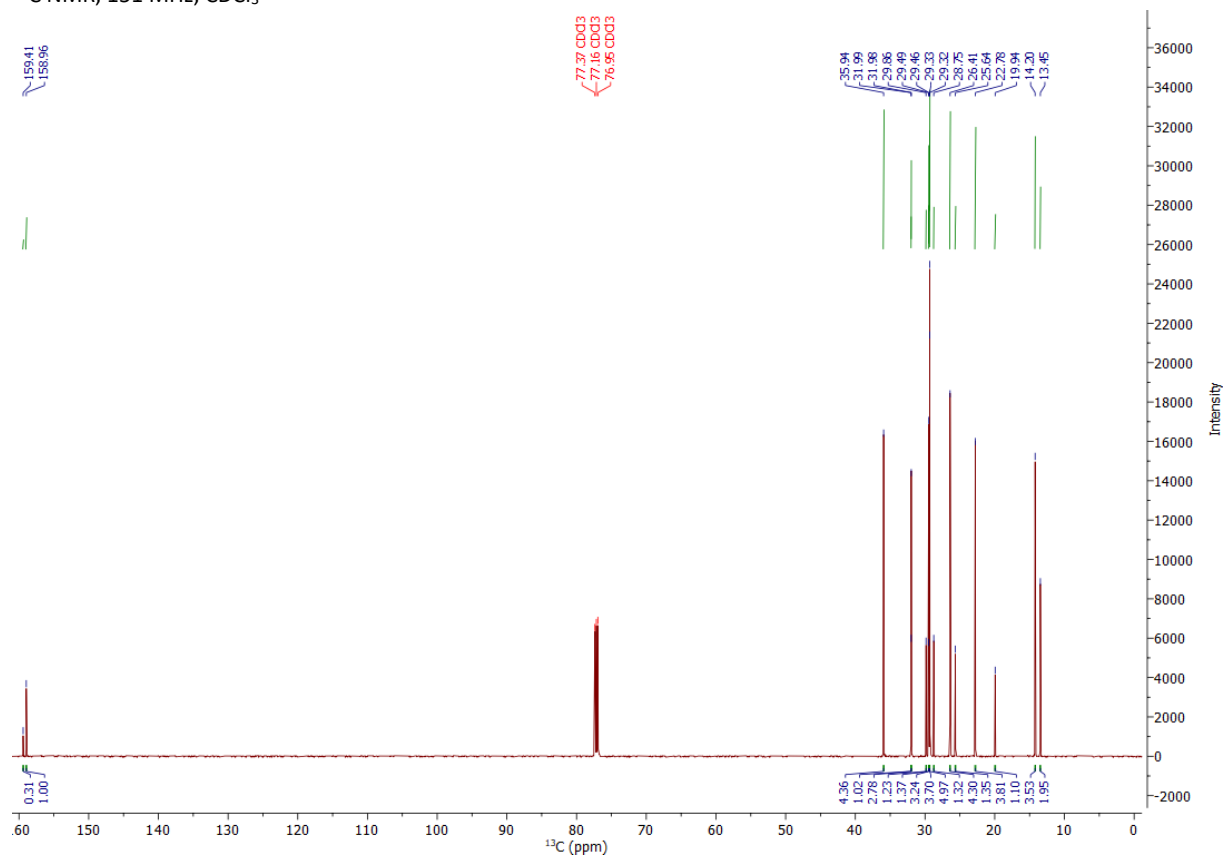

**(Z)-N-[(5-Bromo-3-methoxy-2H-pyrrol-2-ylidene)methyl]-N-ethylethanamine (10)**

$^1\text{H}$  NMR, 600 MHz,  $\text{CDCl}_3$

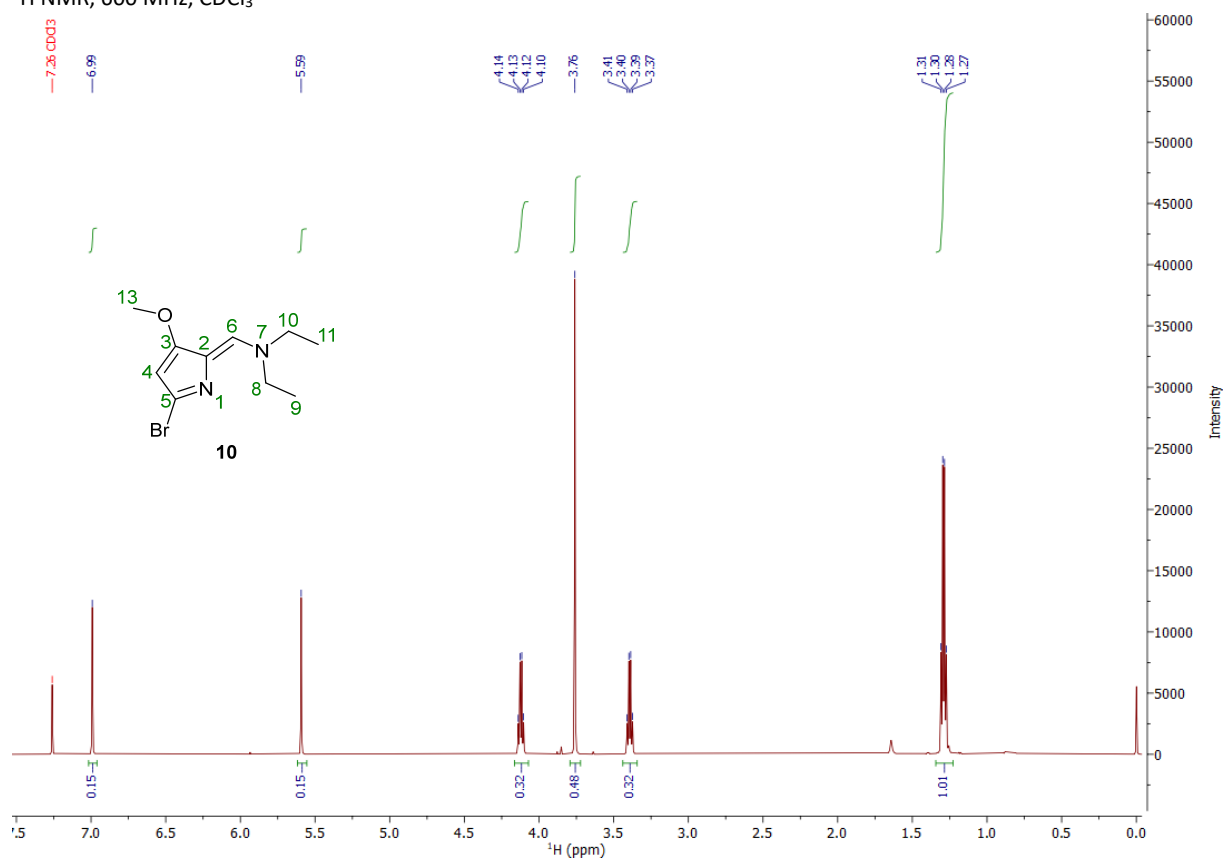

$^{13}\text{C}$  NMR, 151 MHz,  $\text{CDCl}_3$

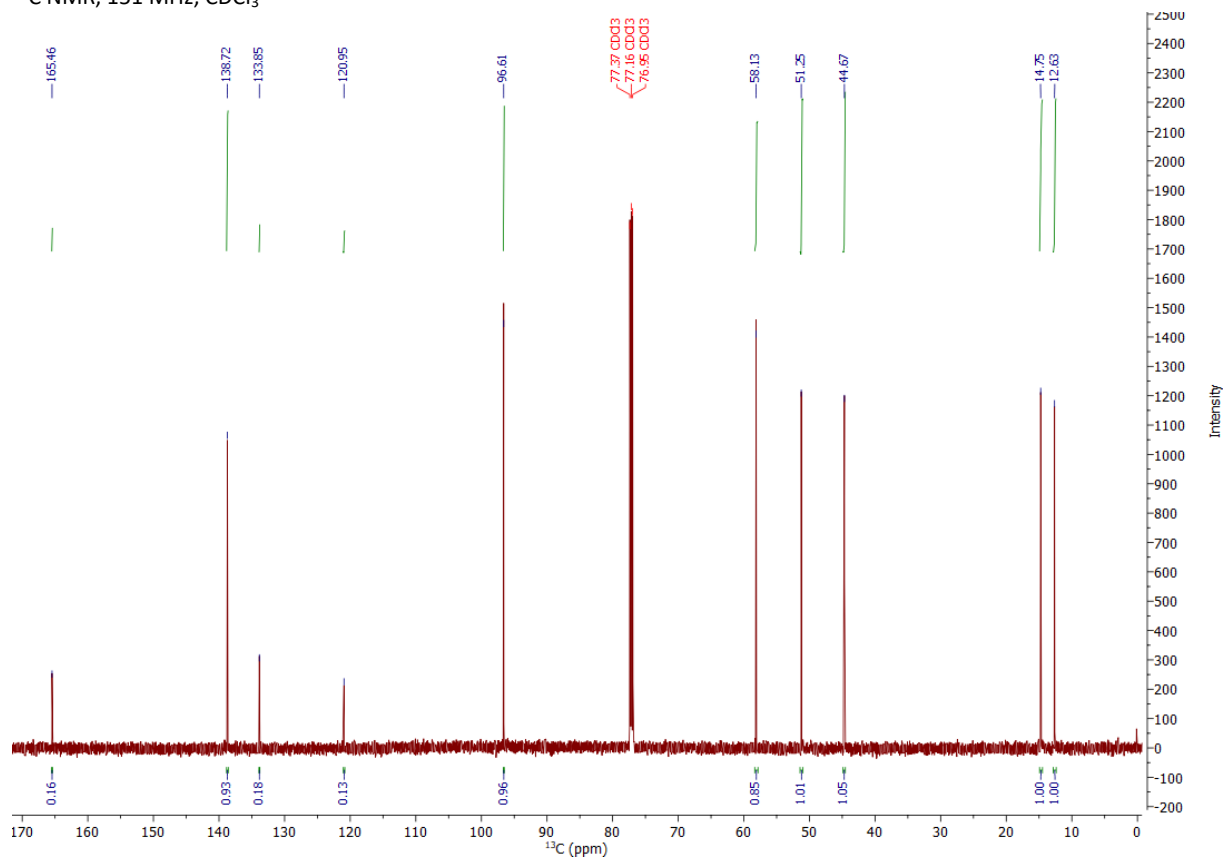

### 1-*tert*-Butyloxycarbonyl 2-methyl-1*H*-pyrrole (14b)

$^1\text{H}$  NMR, 600 MHz,  $\text{CDCl}_3$

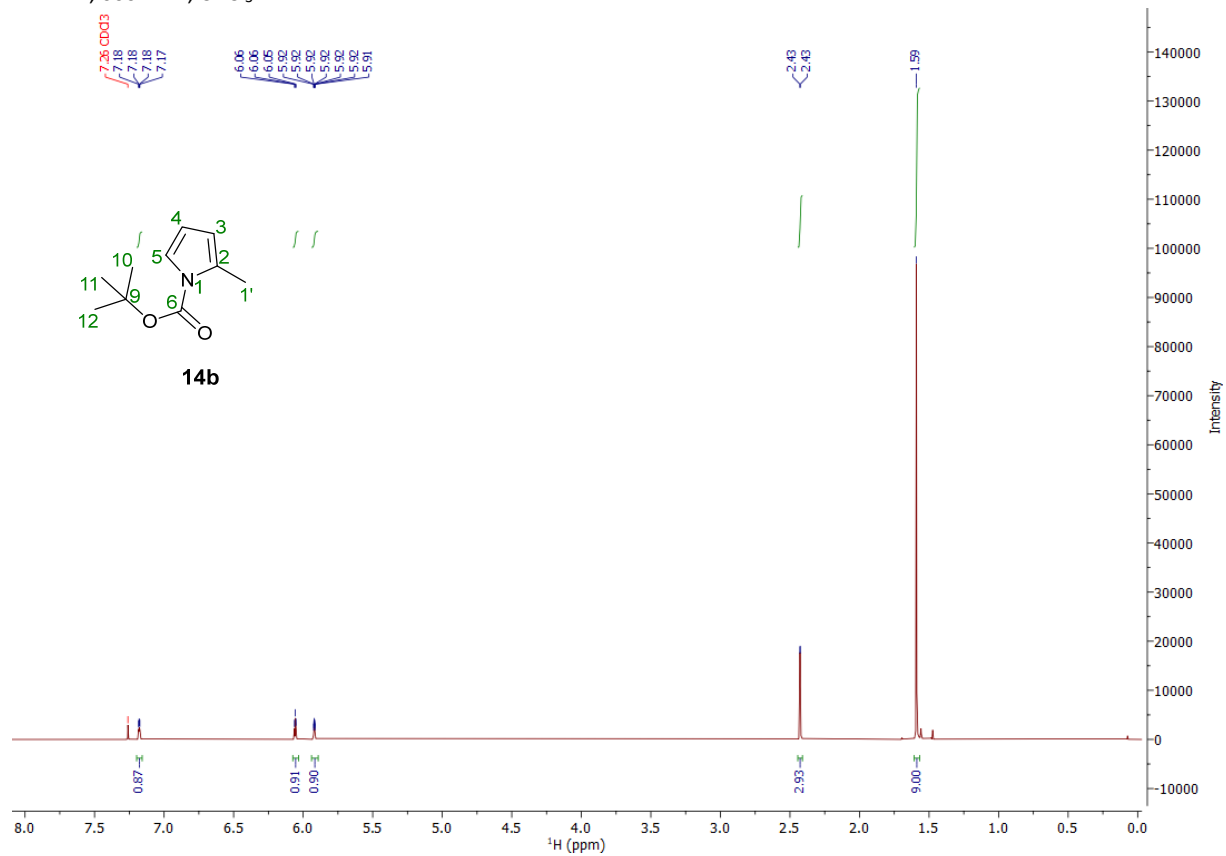

$^{13}\text{C}$  NMR, 151 MHz,  $\text{CDCl}_3$

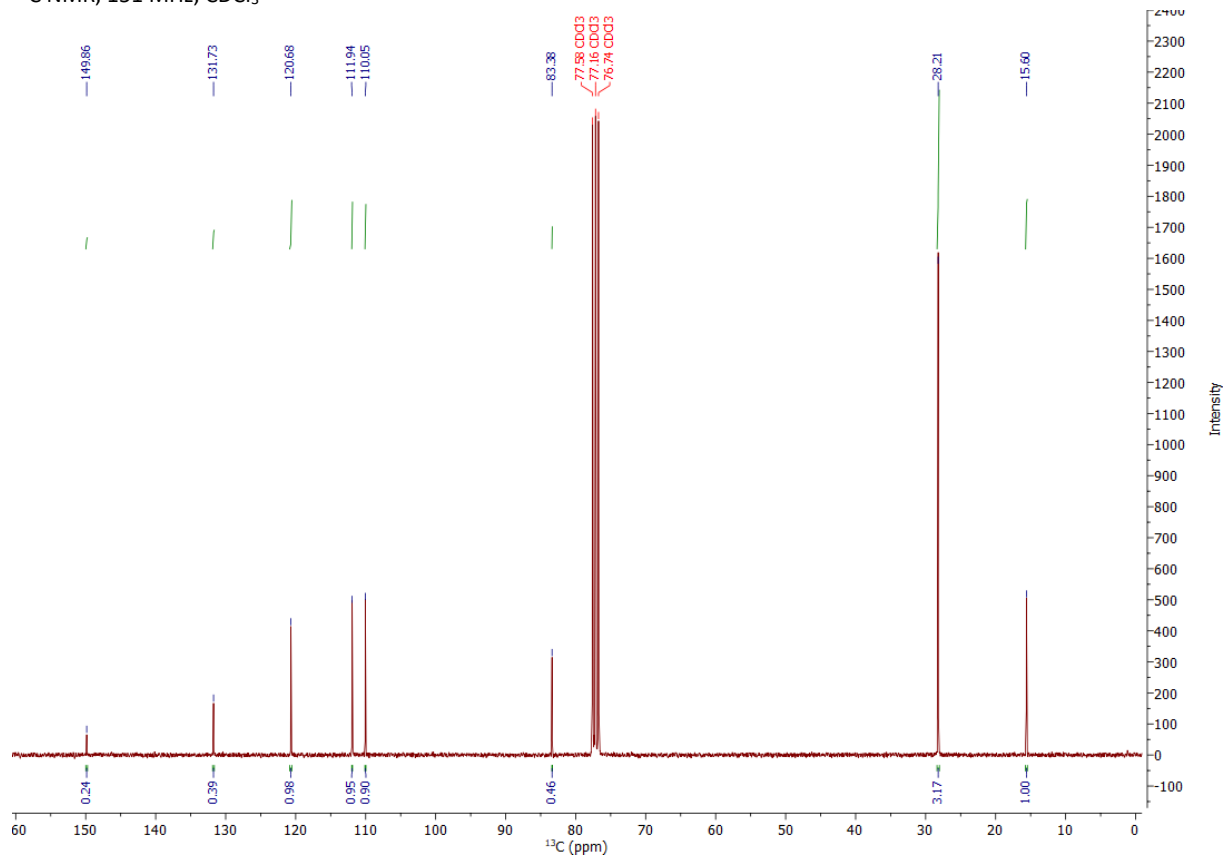



### 1-*tert*-Butyloxycarbonyl 2-ethyl-1*H*-pyrrole (14c)

<sup>1</sup>H NMR, 600 MHz, CDCl<sub>3</sub>

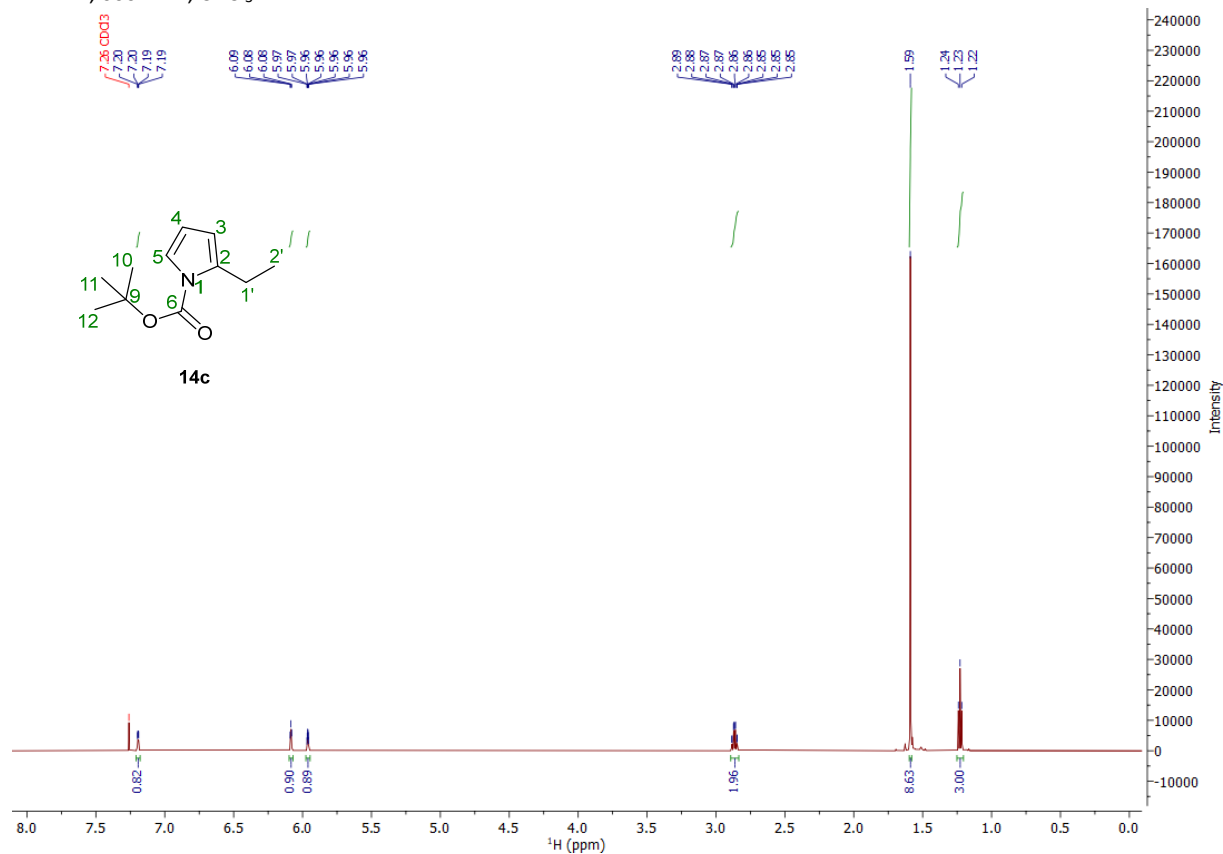

<sup>13</sup>C NMR, 151 MHz, CDCl<sub>3</sub>

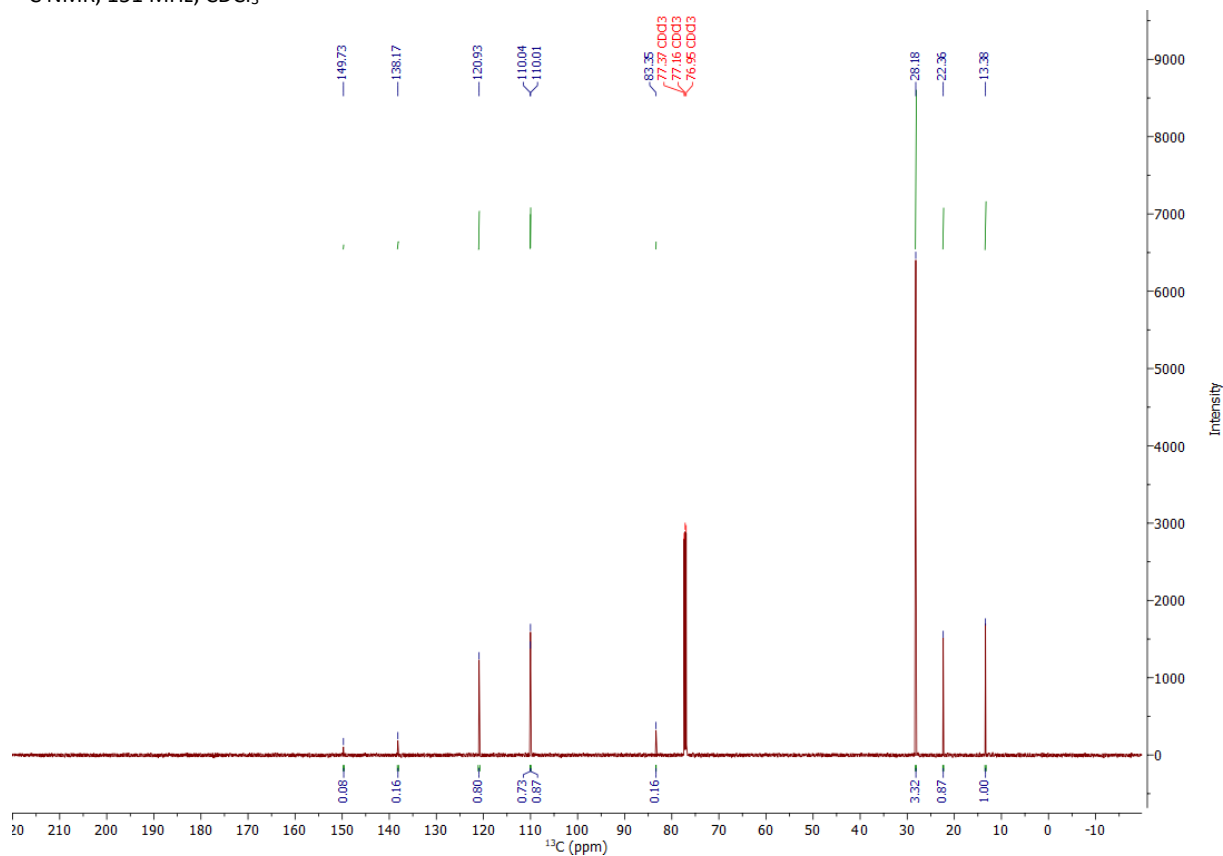

### 1-*tert*-Butyloxycarbonyl 2-propyl-1*H*-pyrrole (14d)

$^1\text{H}$  NMR, 600 MHz,  $\text{CDCl}_3$

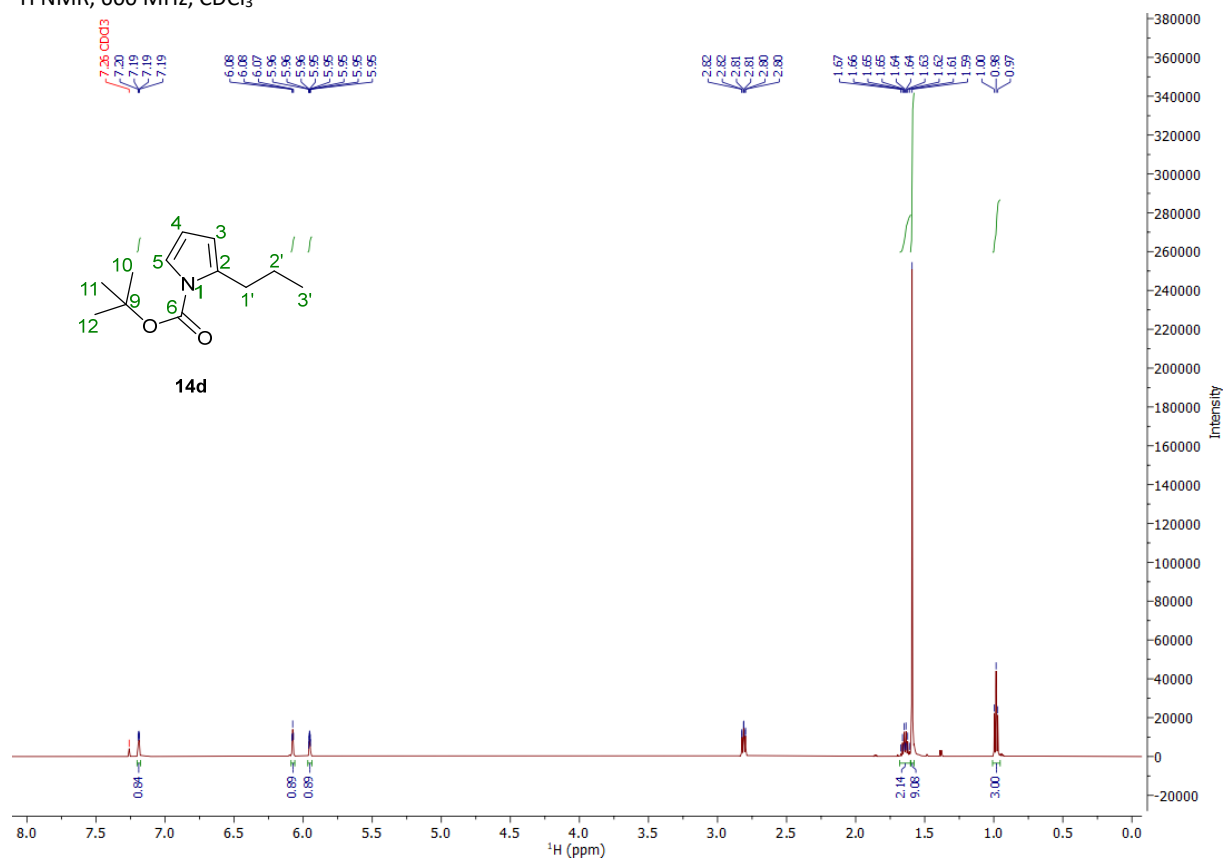

$^{13}\text{C}$  NMR, 151 MHz,  $\text{CDCl}_3$

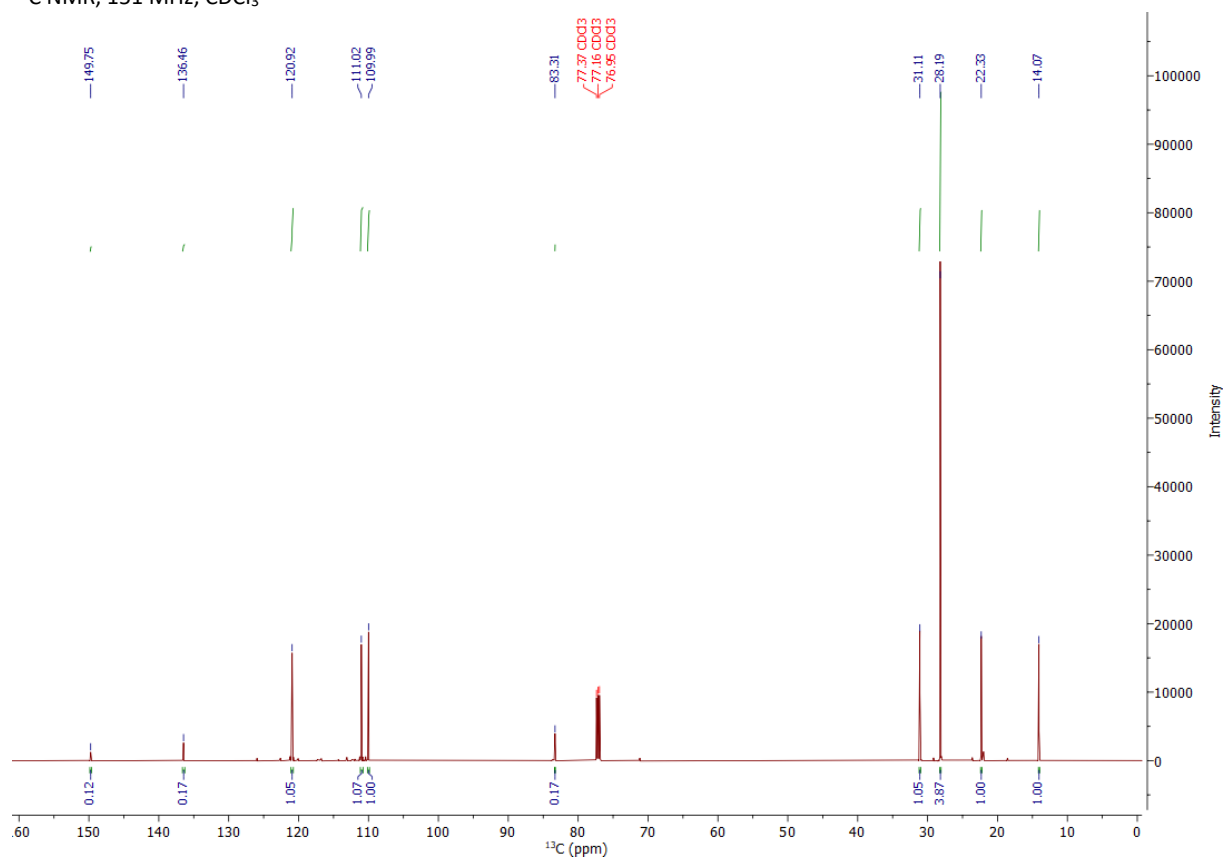

### 1-*tert*-Butyloxycarbonyl 2-butyl-1*H*-pyrrole (14e)

<sup>1</sup>H NMR, 600 MHz, CDCl<sub>3</sub>

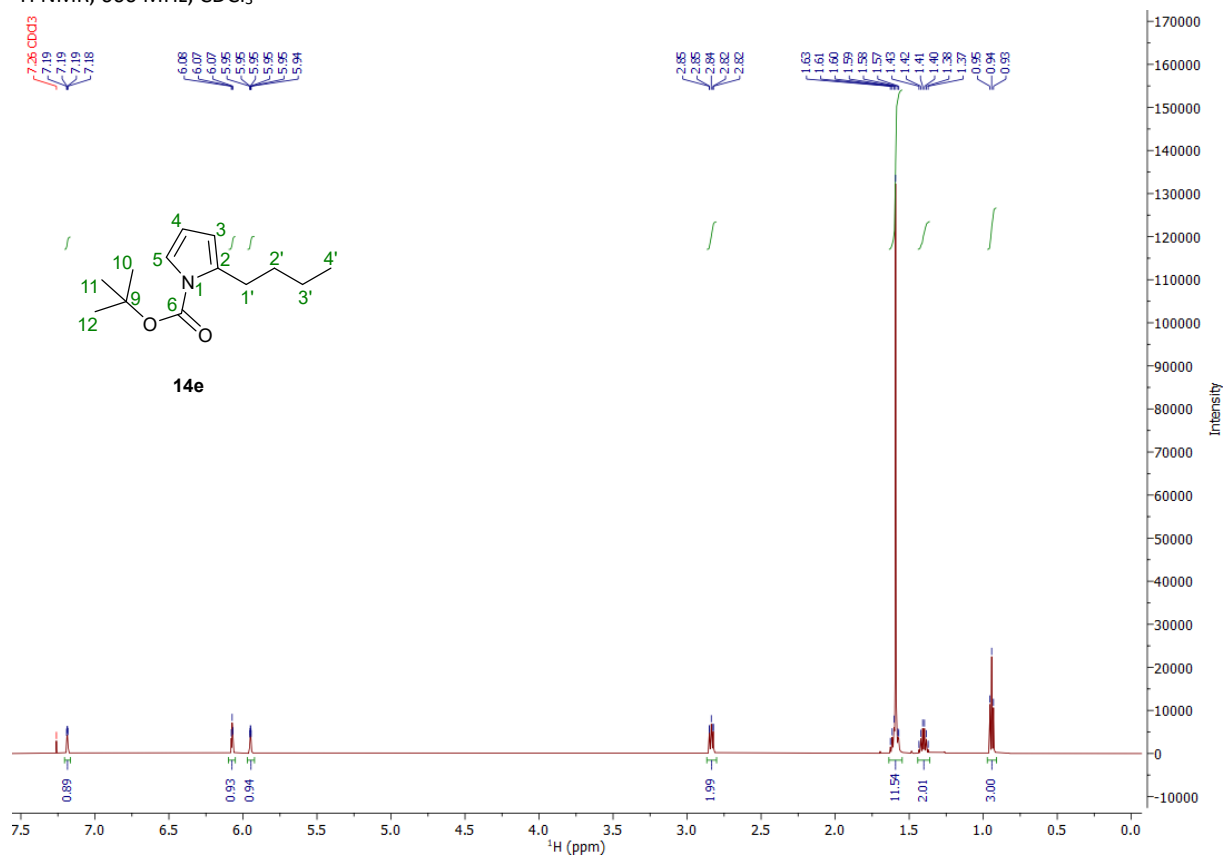

<sup>13</sup>C NMR, 151 MHz, CDCl<sub>3</sub>

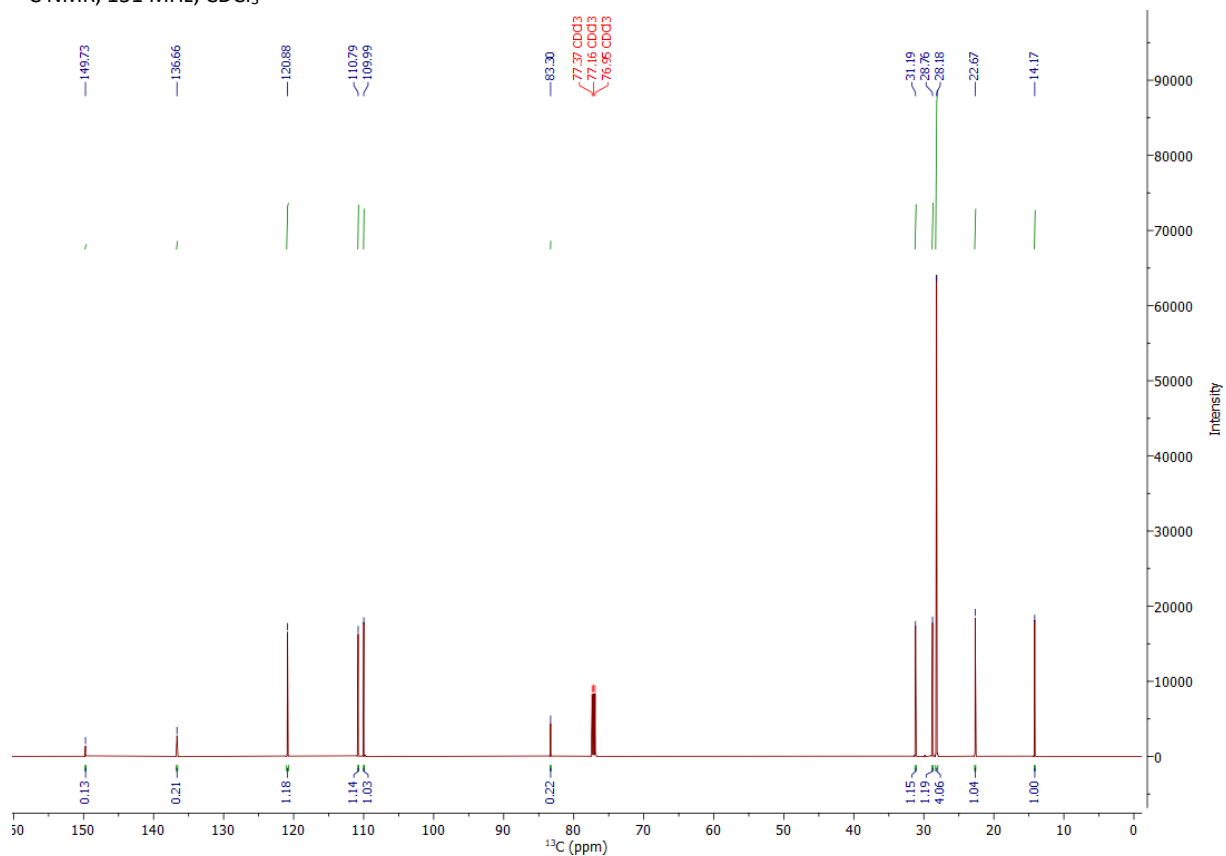

### 1-*tert*-Butyloxycarbonyl 2-pentyl-1*H*-pyrrole (14f)

$^1\text{H}$  NMR, 600 MHz,  $\text{CDCl}_3$

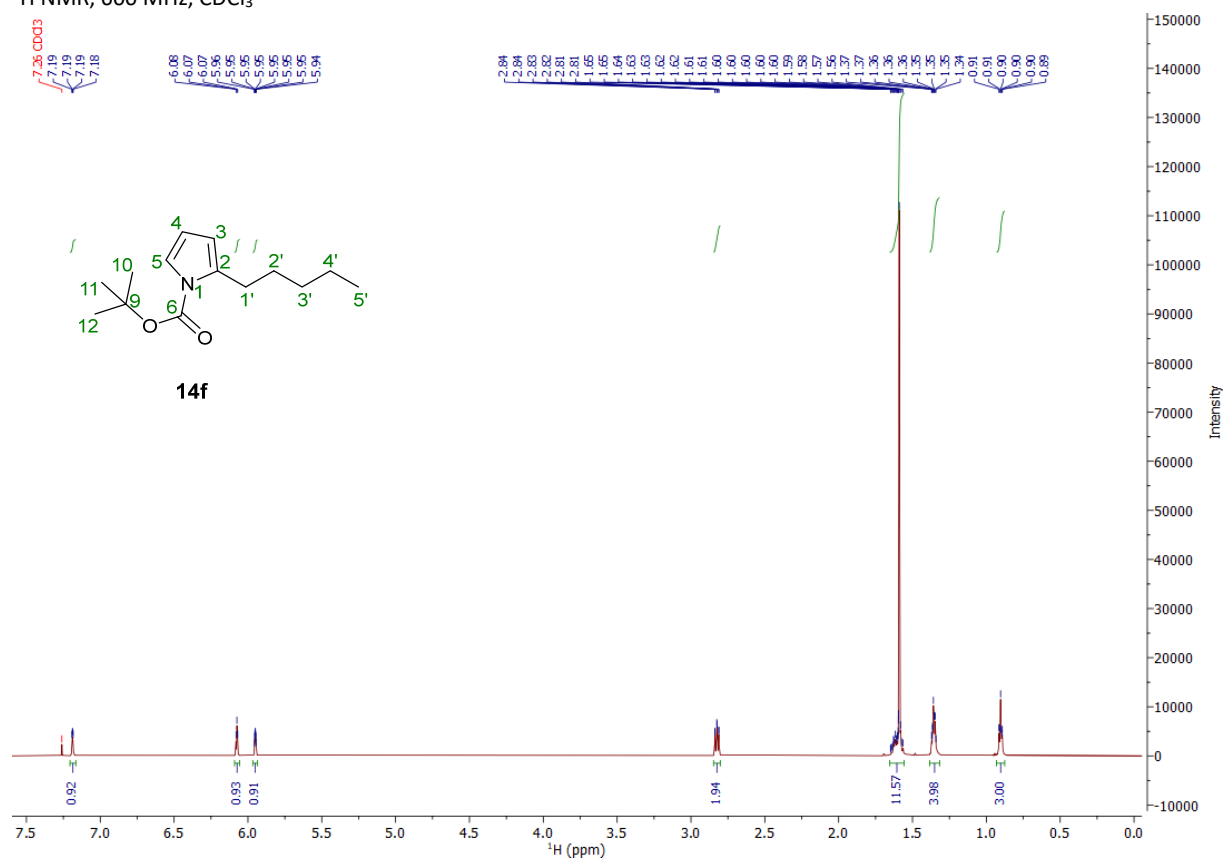

$^{13}\text{C}$  NMR, 151 MHz,  $\text{CDCl}_3$

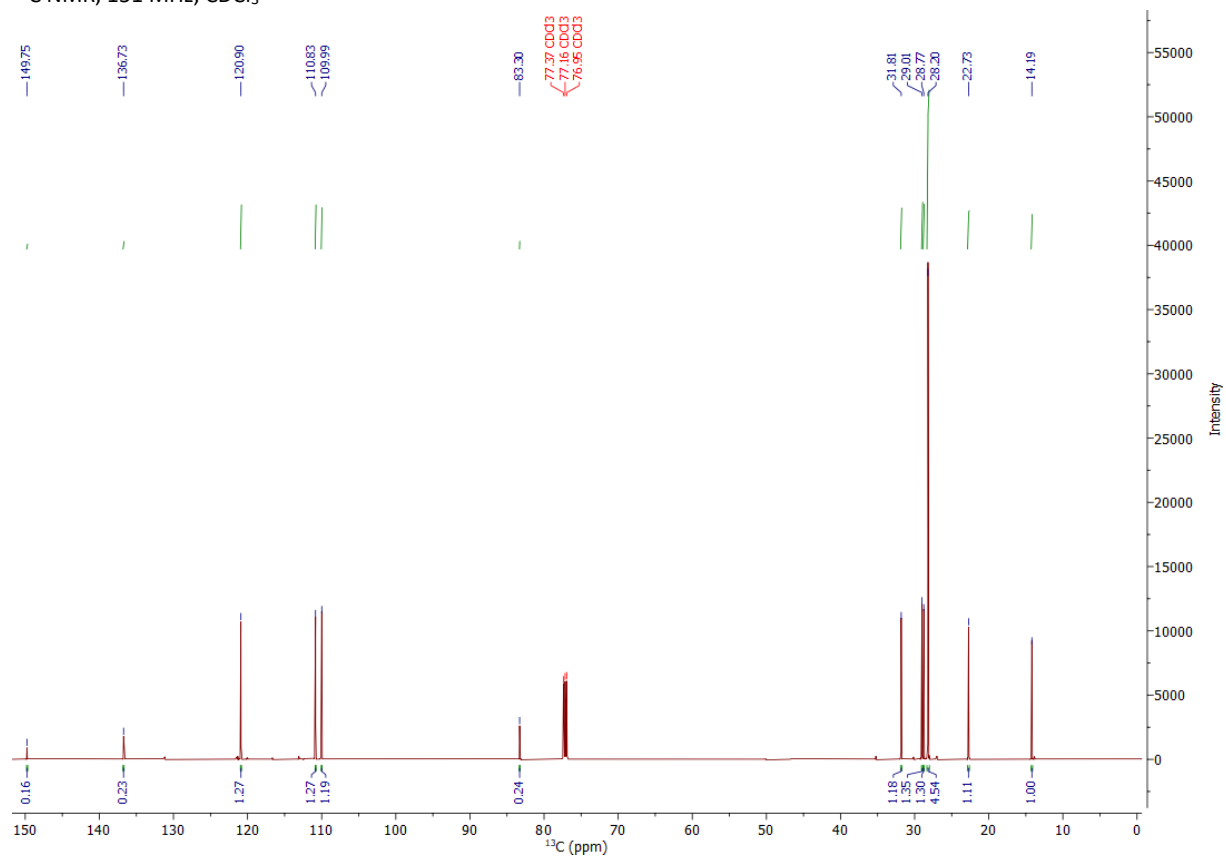

### 1-*tert*-Butyloxycarbonyl 2-hexyl-1*H*-pyrrole (14g)

$^1\text{H}$  NMR, 600 MHz,  $\text{CDCl}_3$

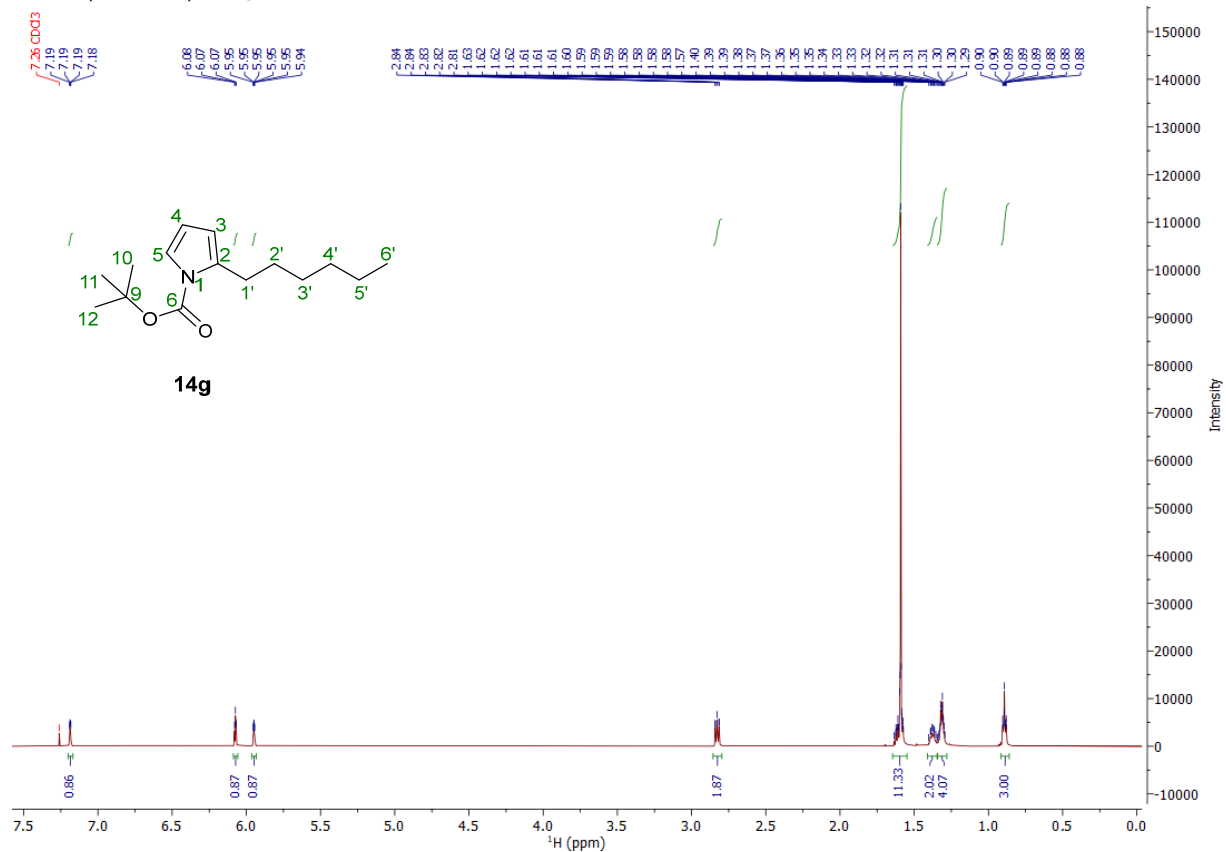

$^{13}\text{C}$  NMR, 151 MHz,  $\text{CDCl}_3$

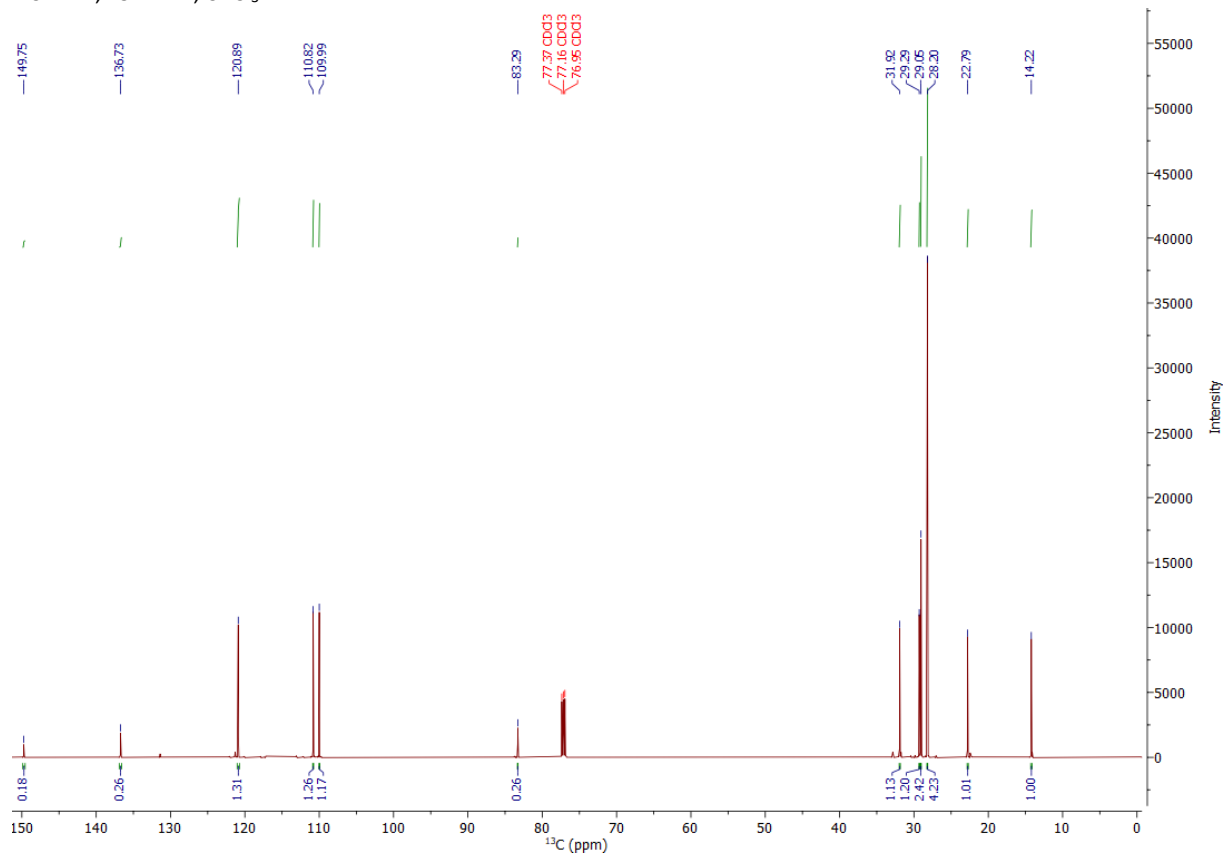

**(1-(*tert*-Butoxycarbonyl)-5-methyl-1*H*-pyrrol-2-yl)boronic acid (15b)**

<sup>1</sup>H NMR, 300 MHz, CDCl<sub>3</sub>

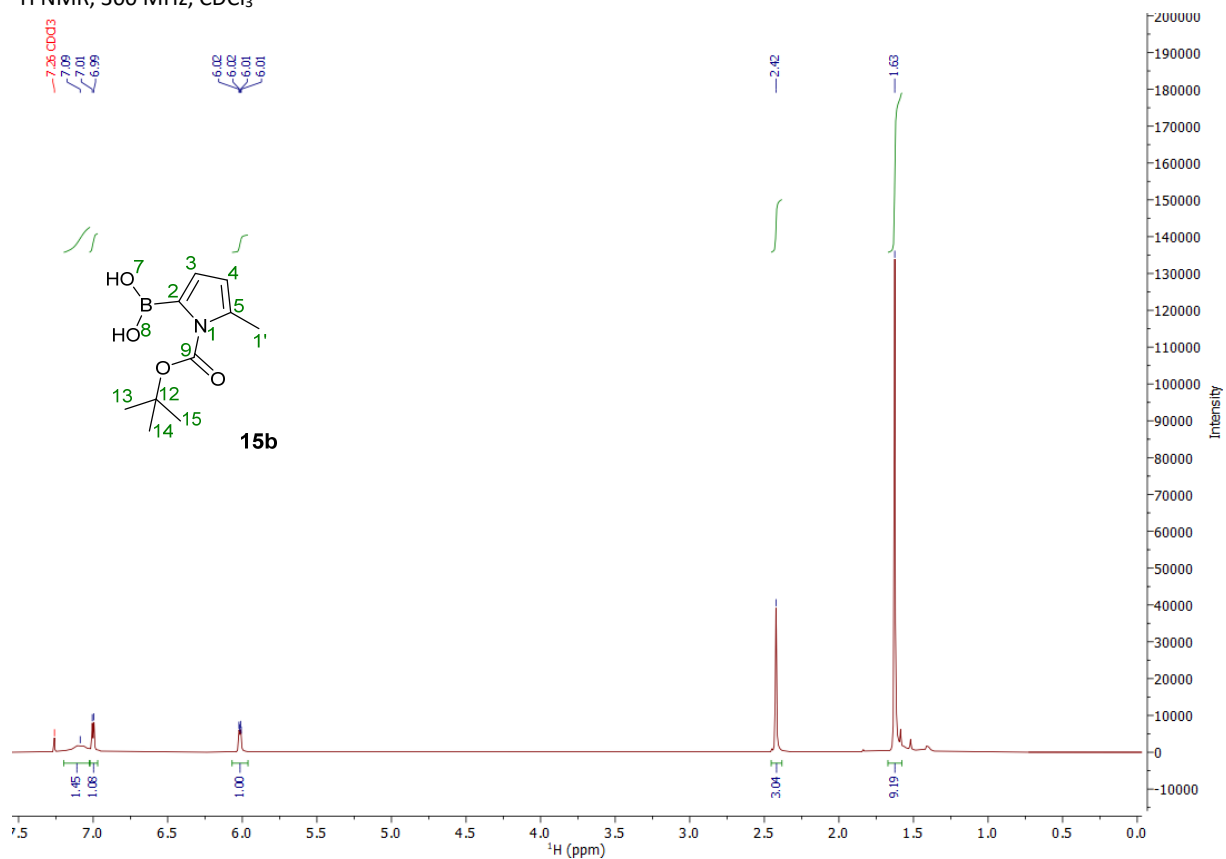

<sup>13</sup>C NMR, 76 MHz, CDCl<sub>3</sub>

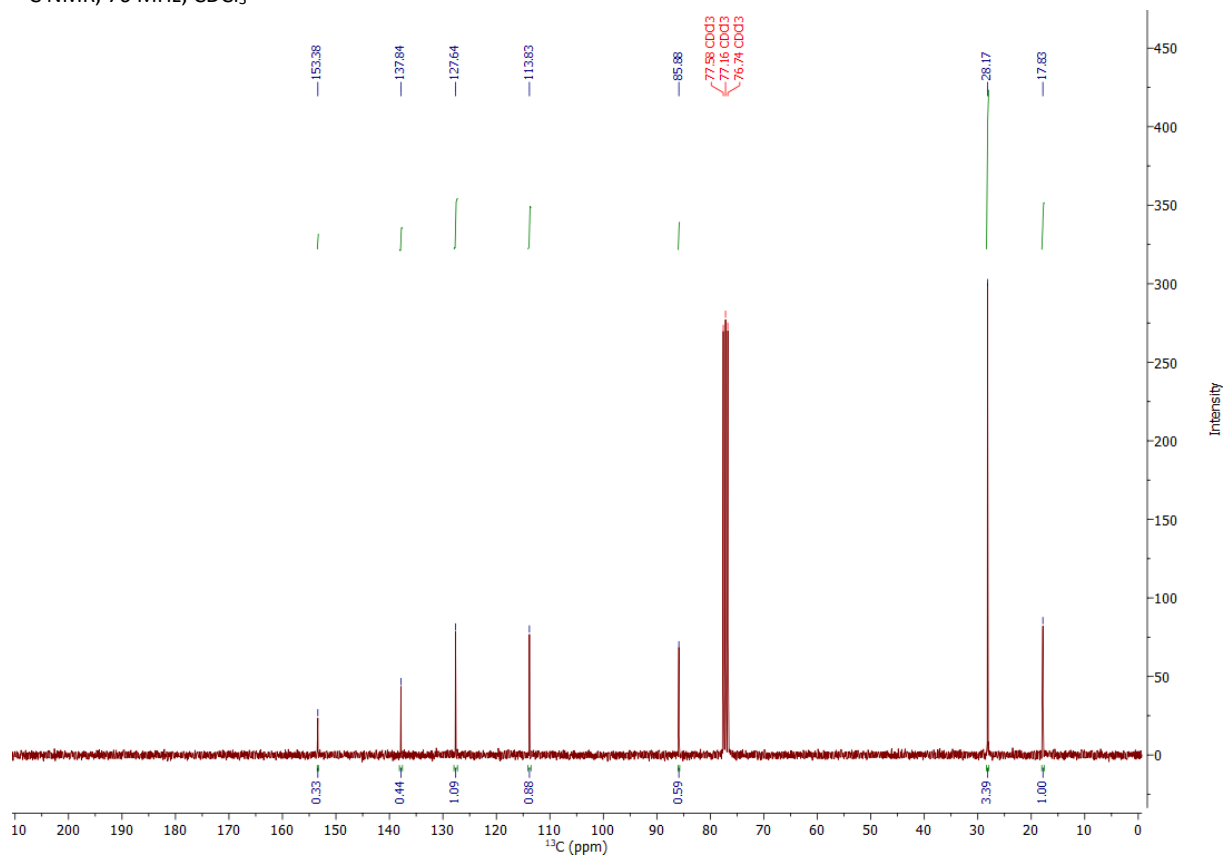

**(1-(*tert*-Butoxycarbonyl)-5-ethyl-1*H*-pyrrol-2-yl)boronic acid (15c)**

<sup>1</sup>H NMR, 300 MHz, CDCl<sub>3</sub>

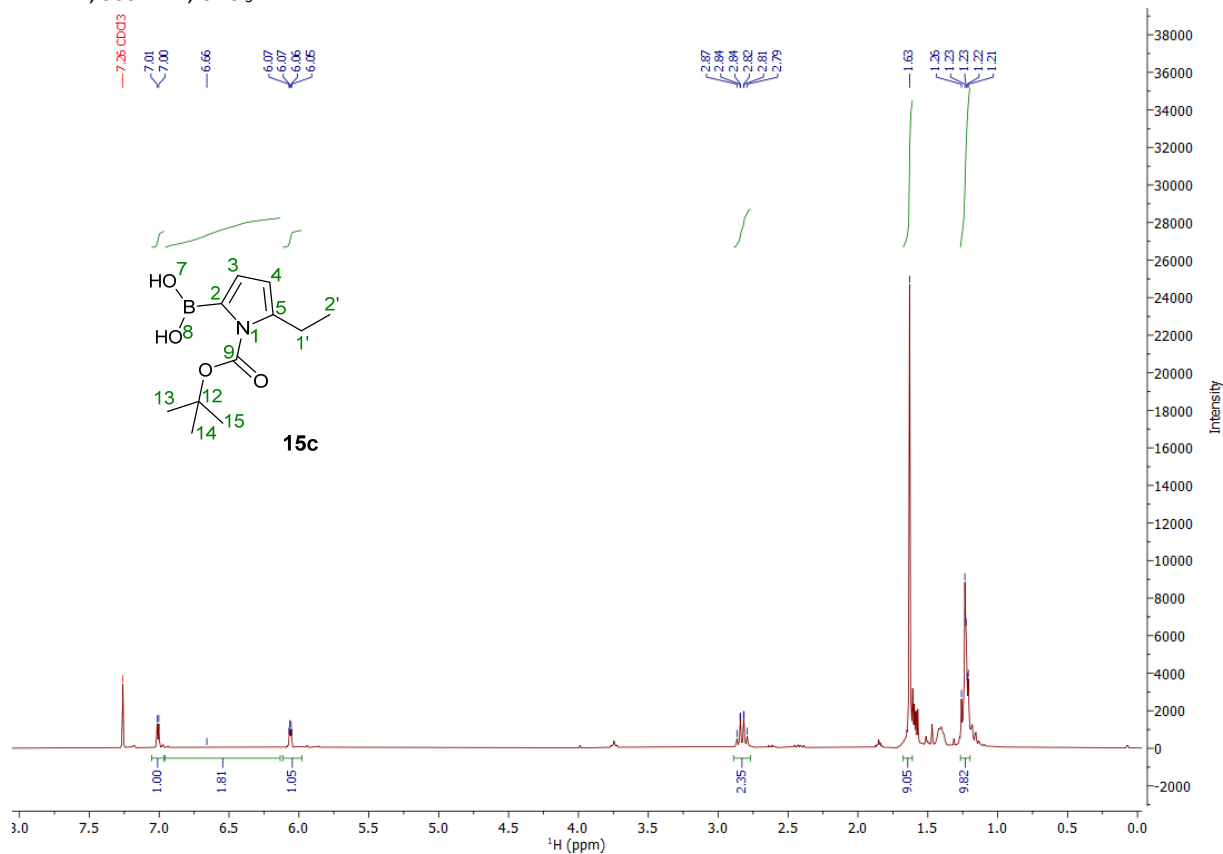

<sup>13</sup>C NMR, 76 MHz, CDCl<sub>3</sub>

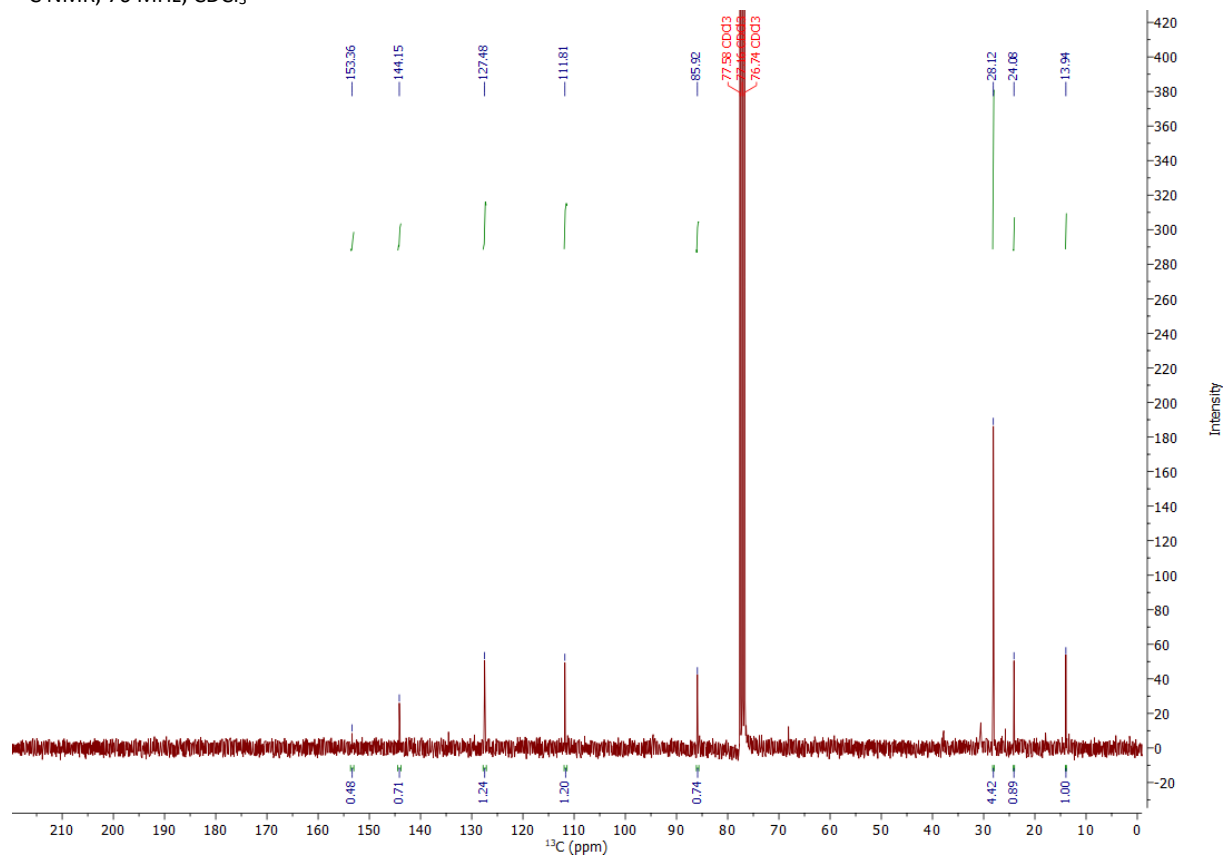

**(1-(*tert*-Butoxycarbonyl)-5-propyl-1*H*-pyrrol-2-yl)boronic acid (15d)**

$^1\text{H}$  NMR, 300 MHz,  $\text{CDCl}_3$

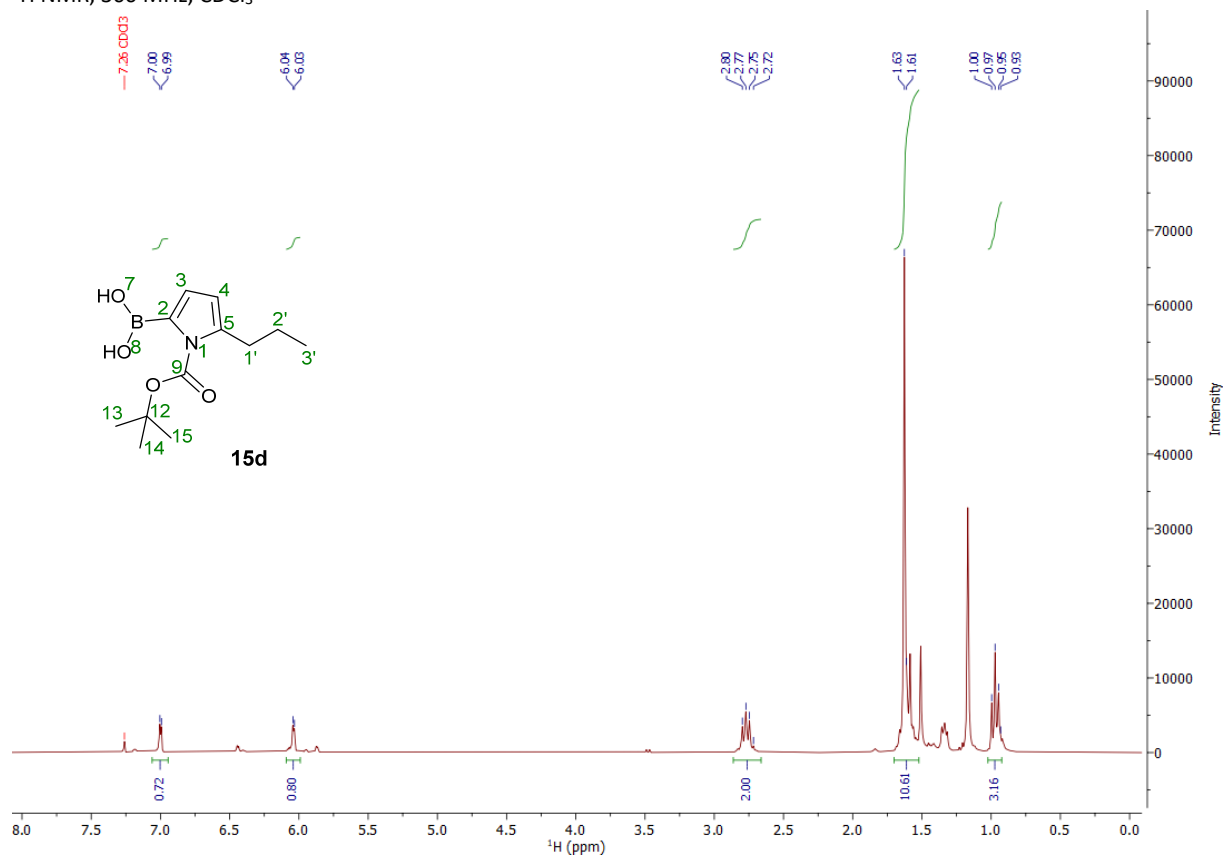

$^{13}\text{C}$  NMR, 76 MHz,  $\text{CDCl}_3$

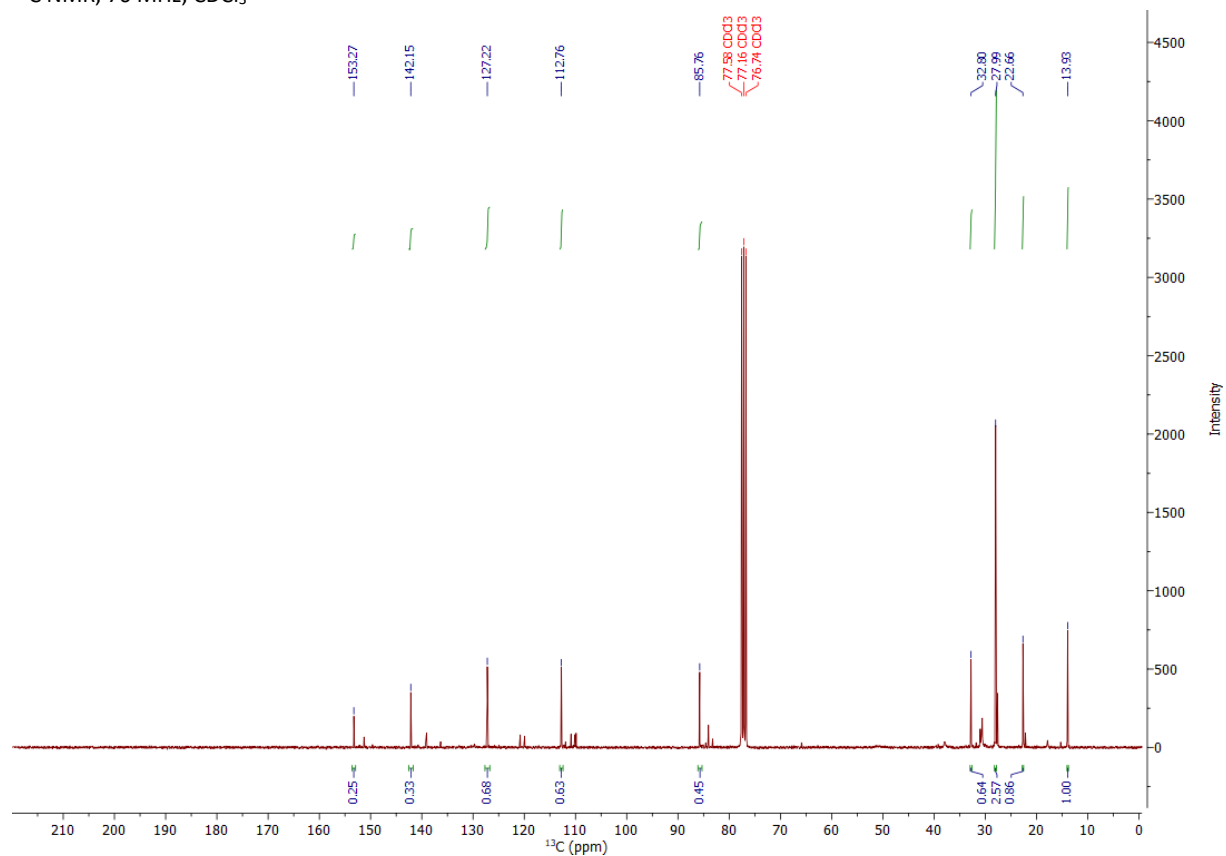



**(1-(*tert*-Butoxycarbonyl)-5-butyl-1*H*-pyrrol-2-yl)boronic acid (15e)**

<sup>1</sup>H NMR, 300 MHz, CDCl<sub>3</sub>

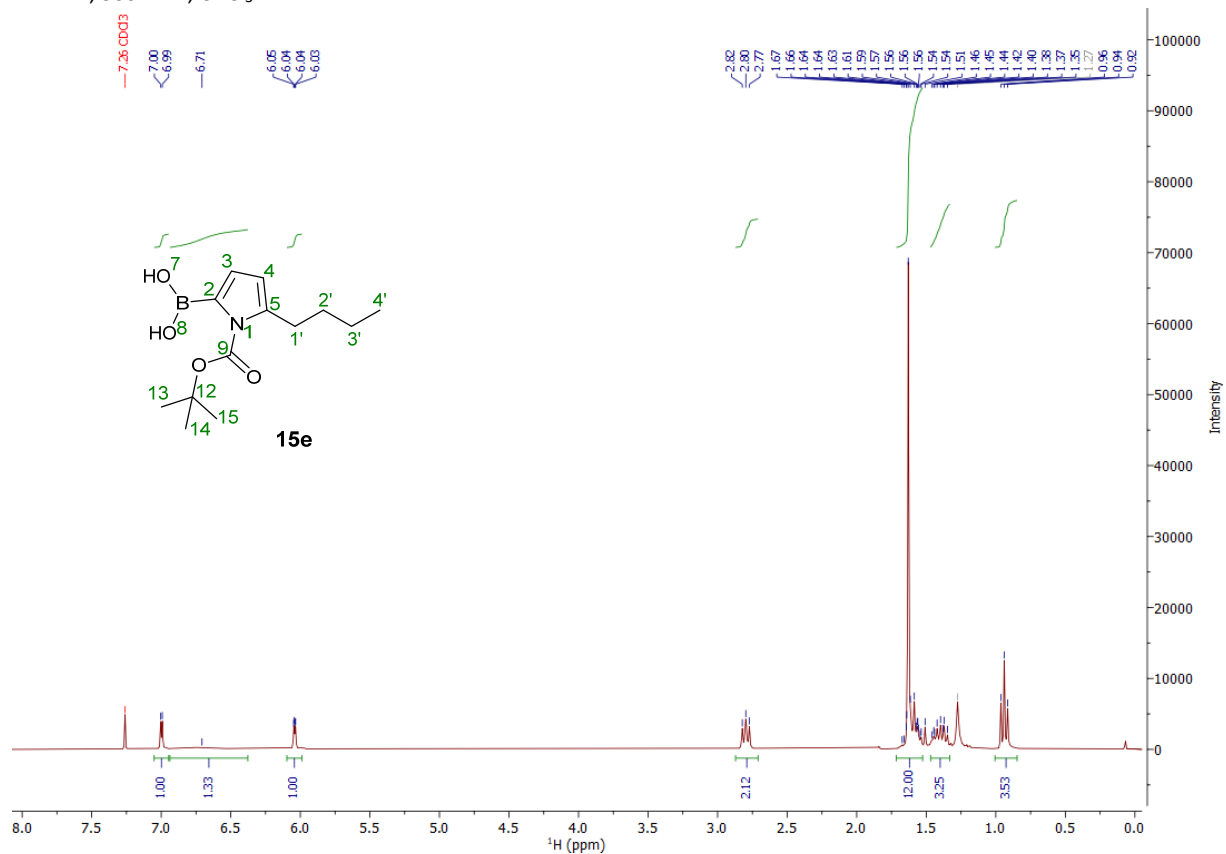

<sup>13</sup>C NMR, 76 MHz, CDCl<sub>3</sub>

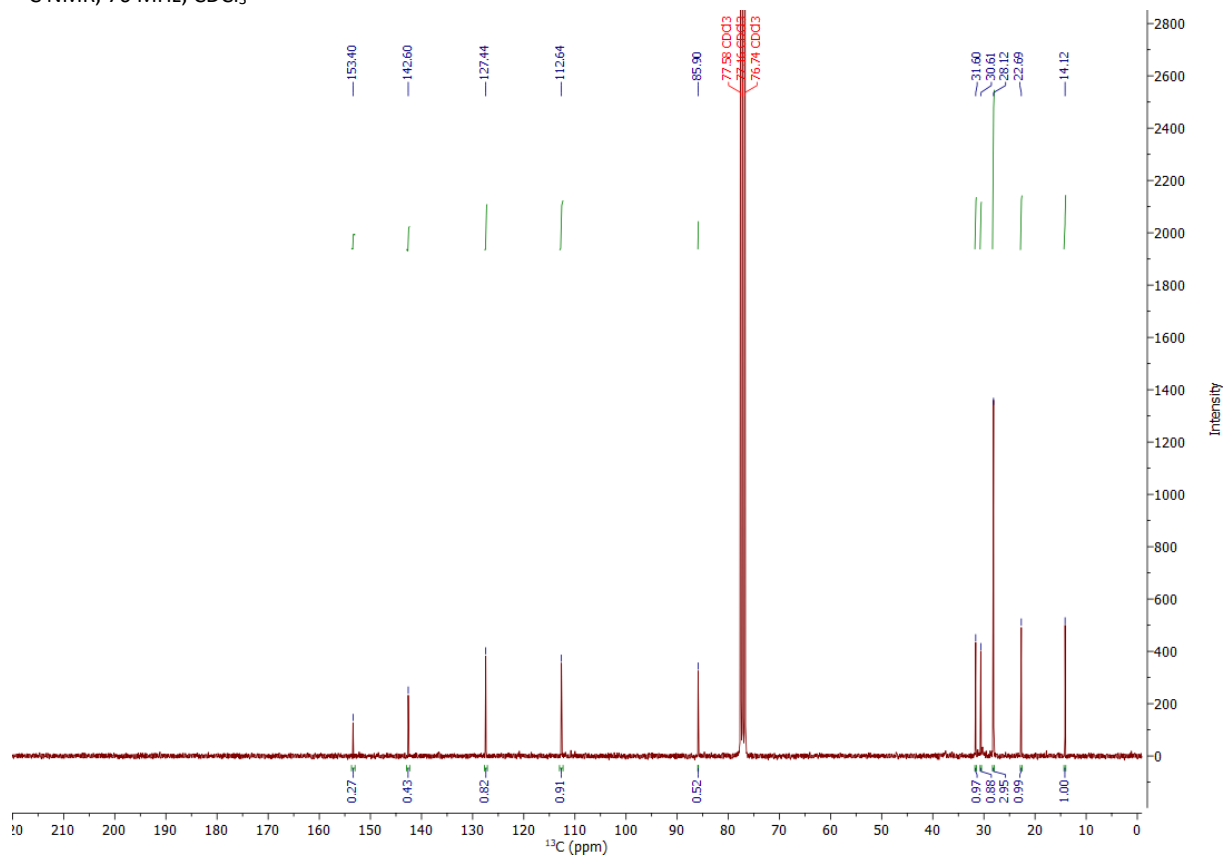

**(1-(*tert*-Butoxycarbonyl)-5-pentyl-1*H*-pyrrol-2-yl)boronic acid (15f)**

<sup>1</sup>H NMR, 300 MHz, CDCl<sub>3</sub>

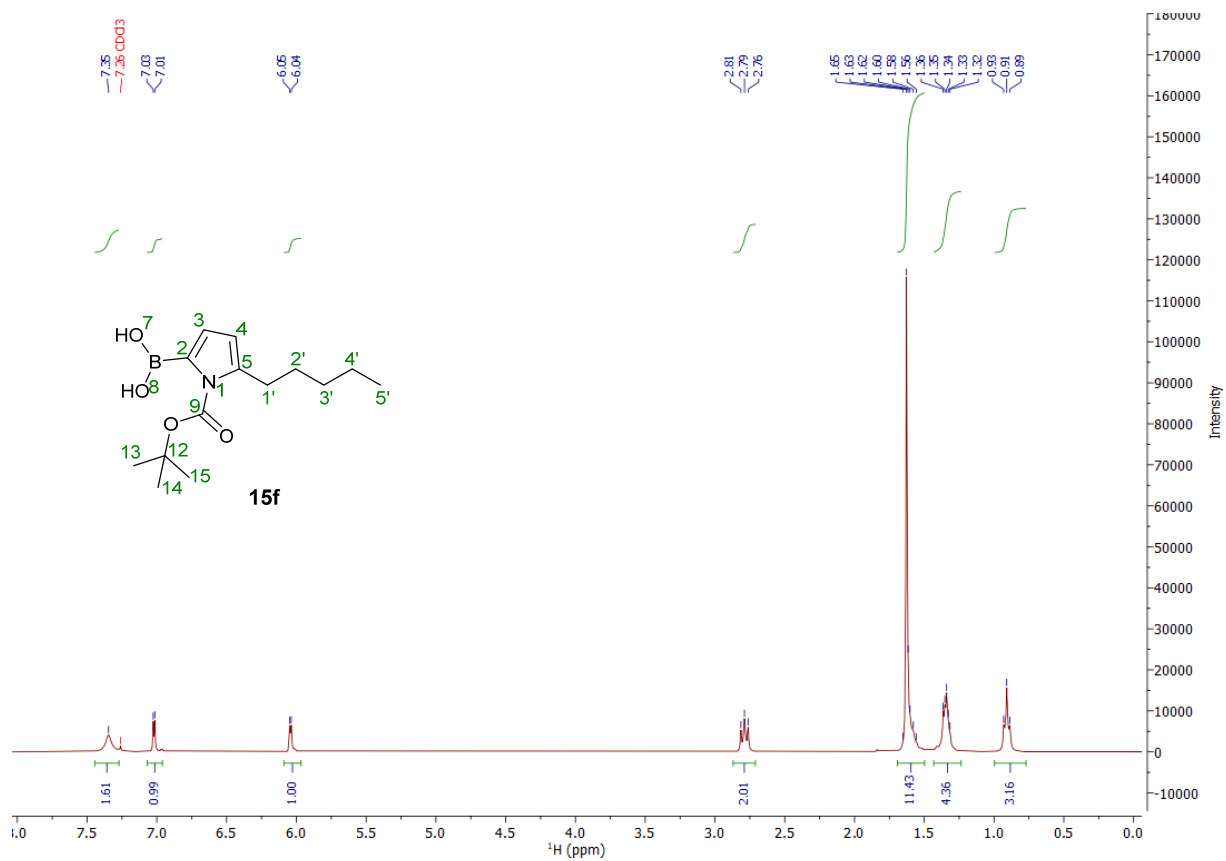

<sup>13</sup>C NMR, 76 MHz, CDCl<sub>3</sub>

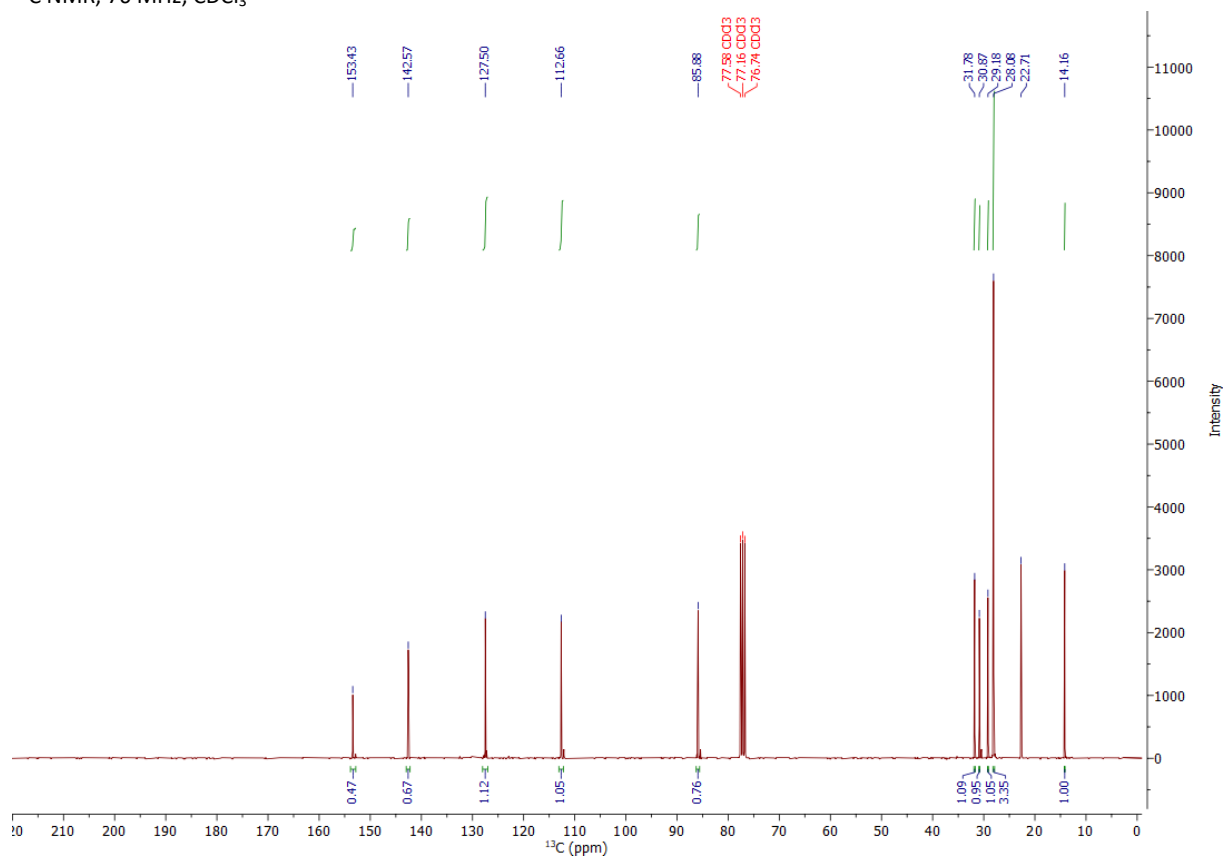

**(1-(*tert*-Butoxycarbonyl)-5-hexyl-1*H*-pyrrol-2-yl)boronic acid (15g)**

<sup>1</sup>H NMR, 300 MHz, CDCl<sub>3</sub>

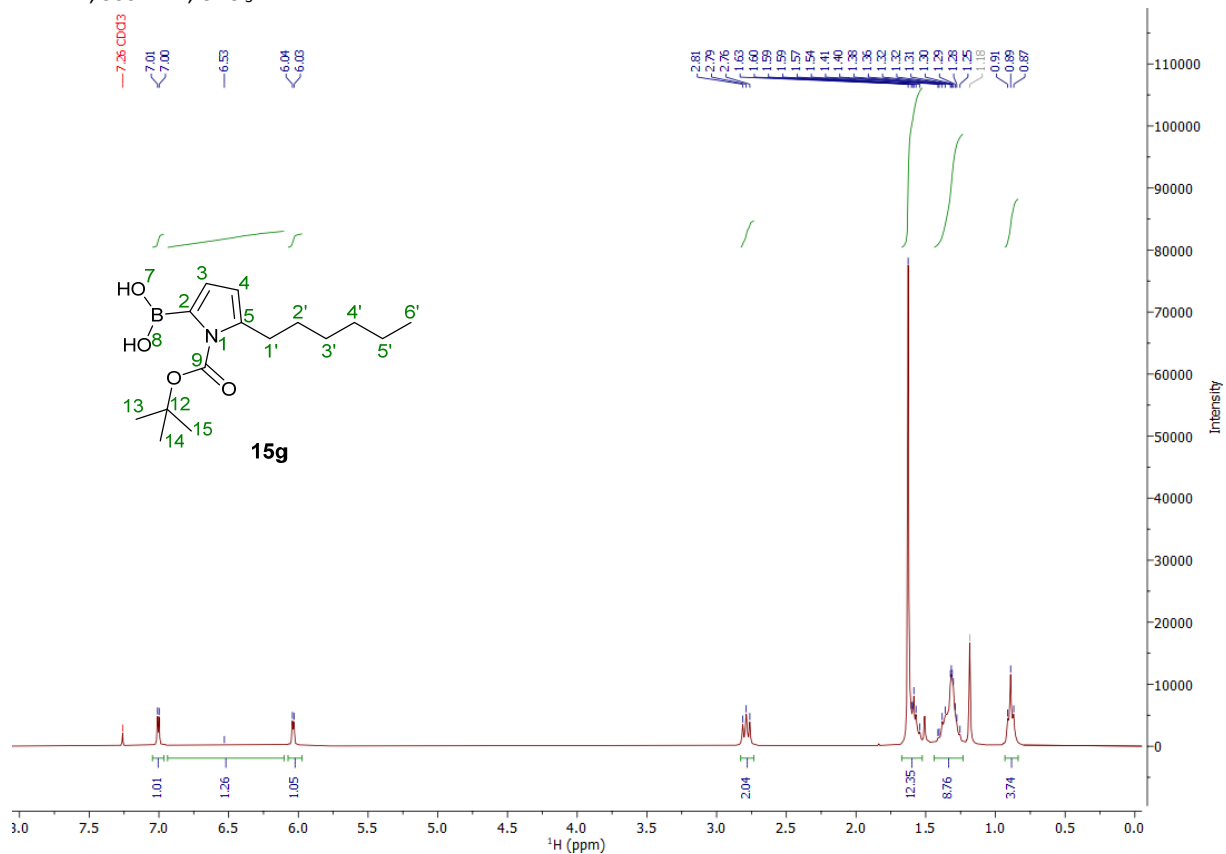

<sup>13</sup>C NMR, 76 MHz, CDCl<sub>3</sub>

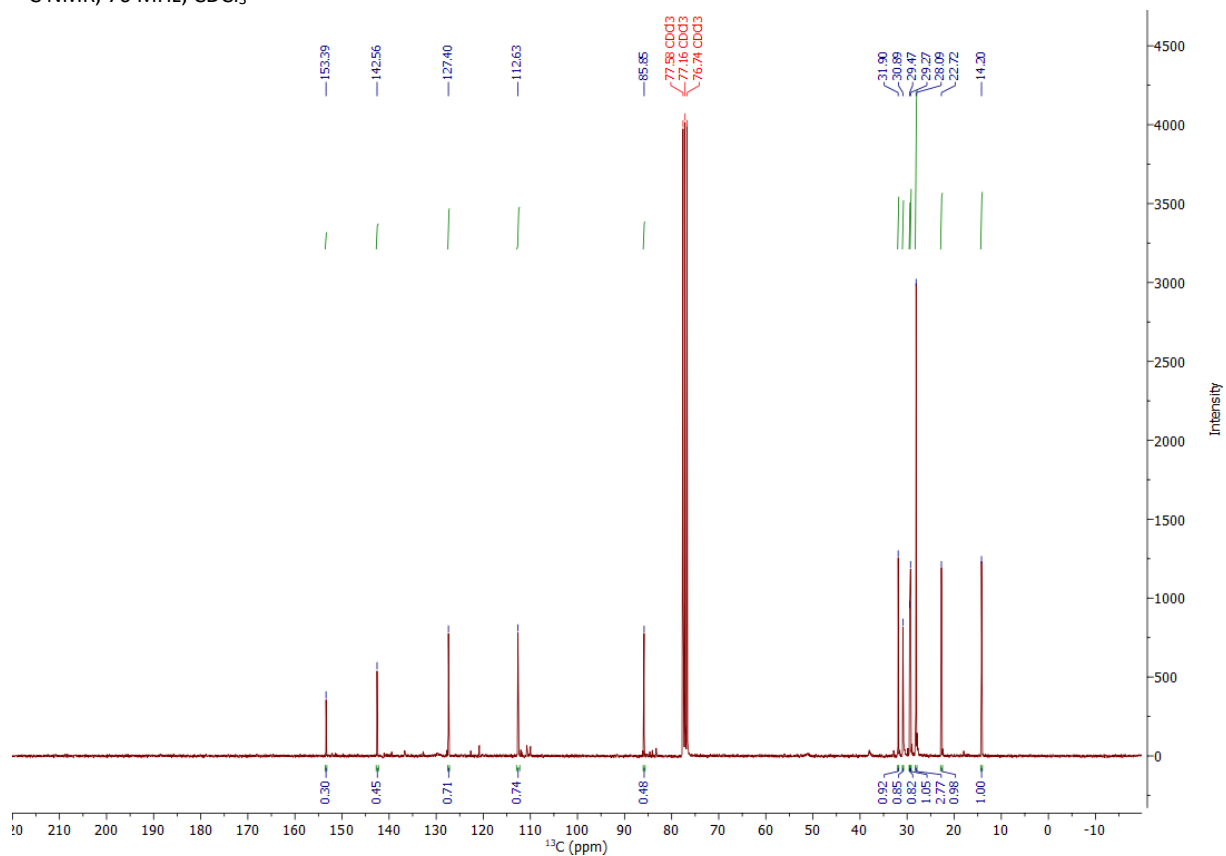

**tert-Butyl 5'-formyl-4'-methoxy-1*H*,1'*H*-[2,2'-bipyrrole]-1-carboxylate (S1)**

<sup>1</sup>H NMR, 600 MHz, CDCl<sub>3</sub>

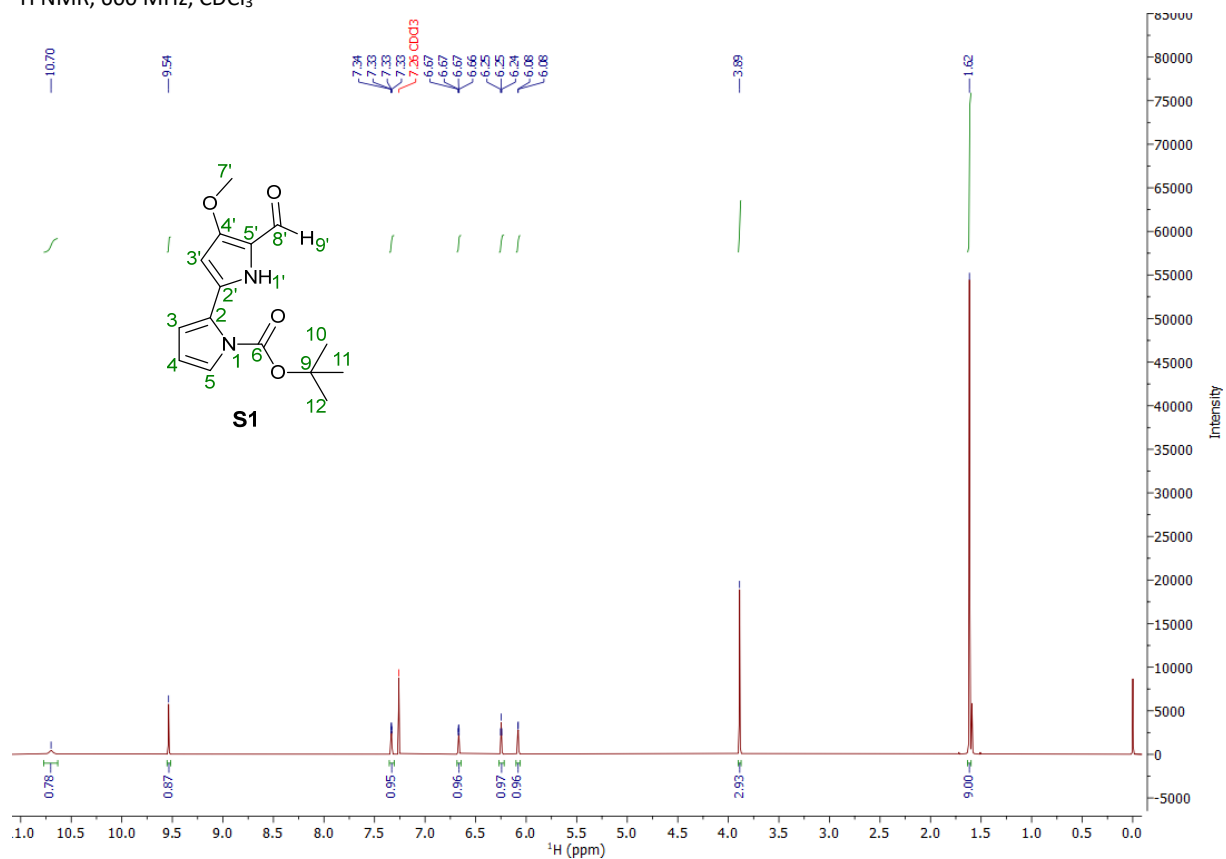

<sup>13</sup>C NMR, 151 MHz, CDCl<sub>3</sub>

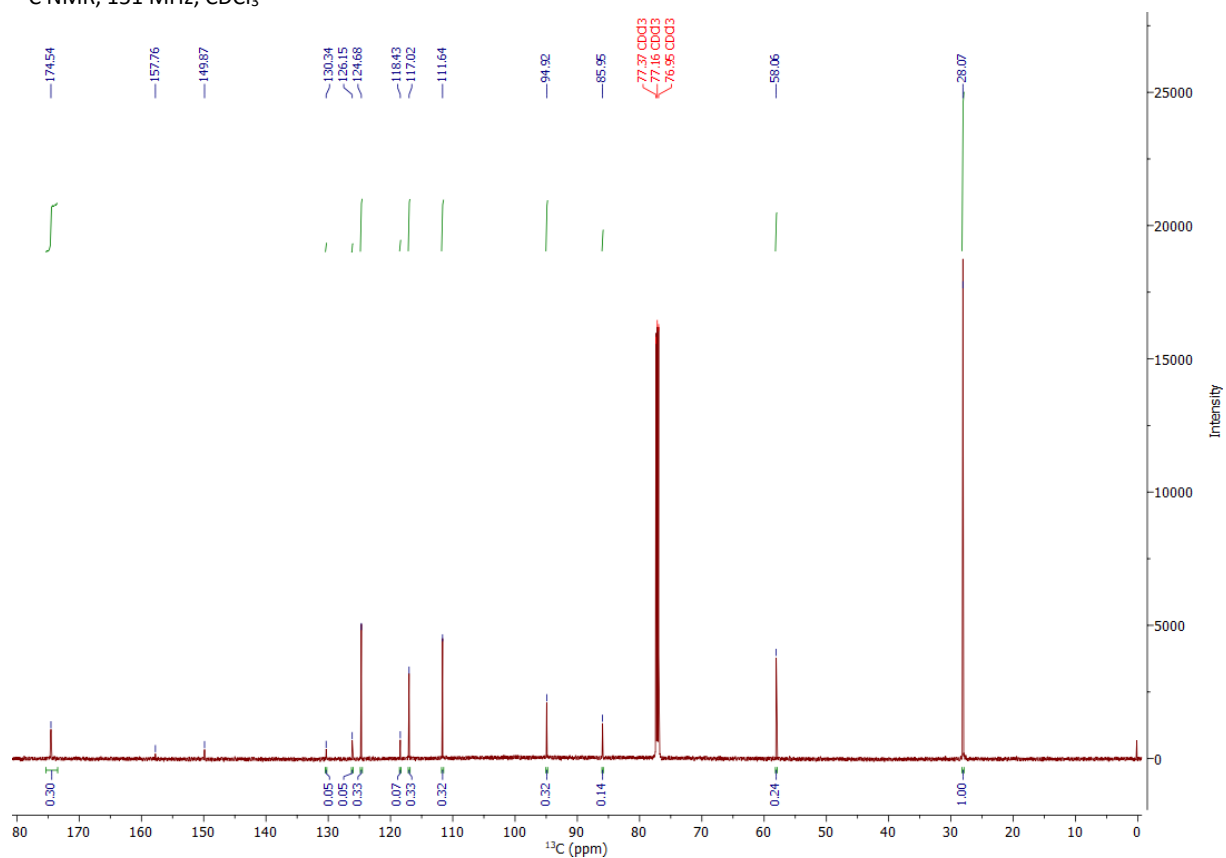

**(Z)-4'-Methoxy-5'-((5-methyl-4-pentyl-1H-pyrrol-2-yl)methylene)-1H,5'H-[2,2'-bipyrrol]-1'-ium chloride (1, prodigiosin)**

<sup>1</sup>H NMR, 300 MHz, CDCl<sub>3</sub>

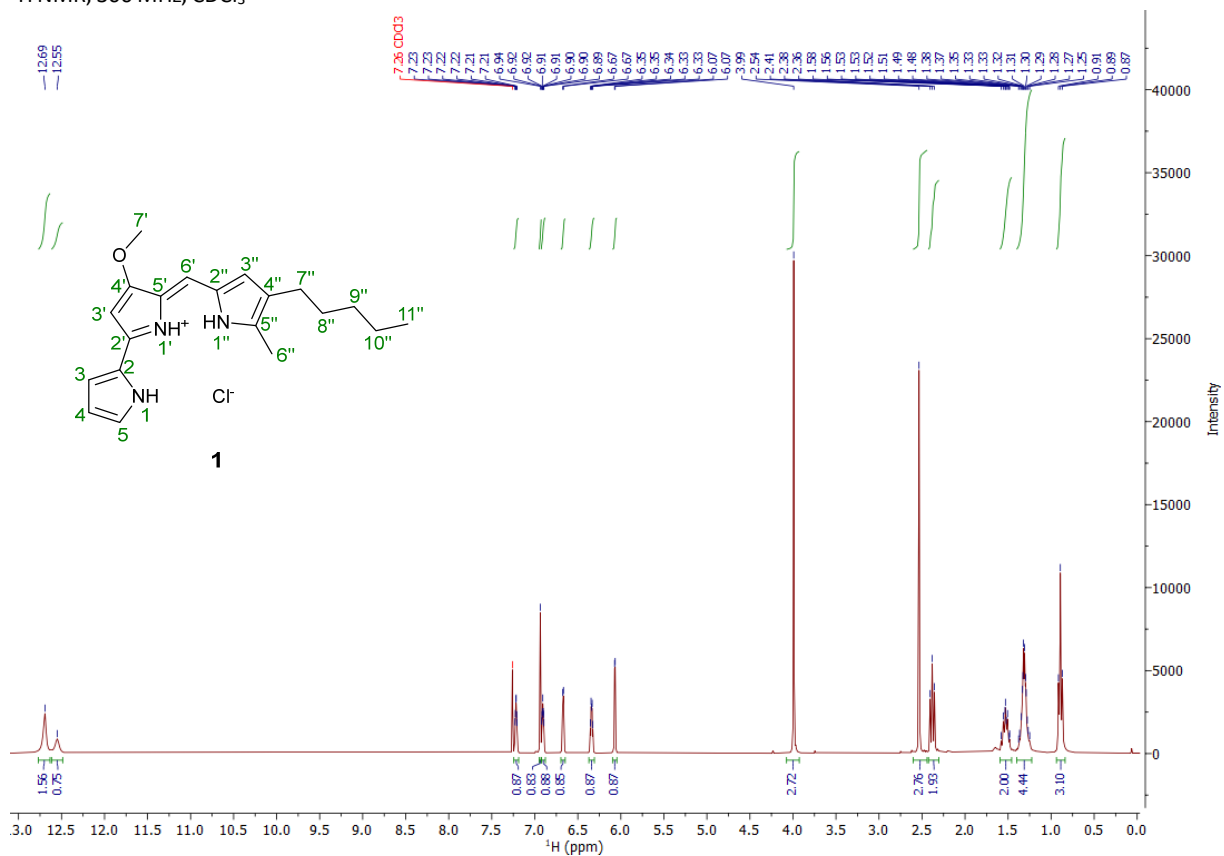

<sup>13</sup>C NMR, 76 MHz, CDCl<sub>3</sub>

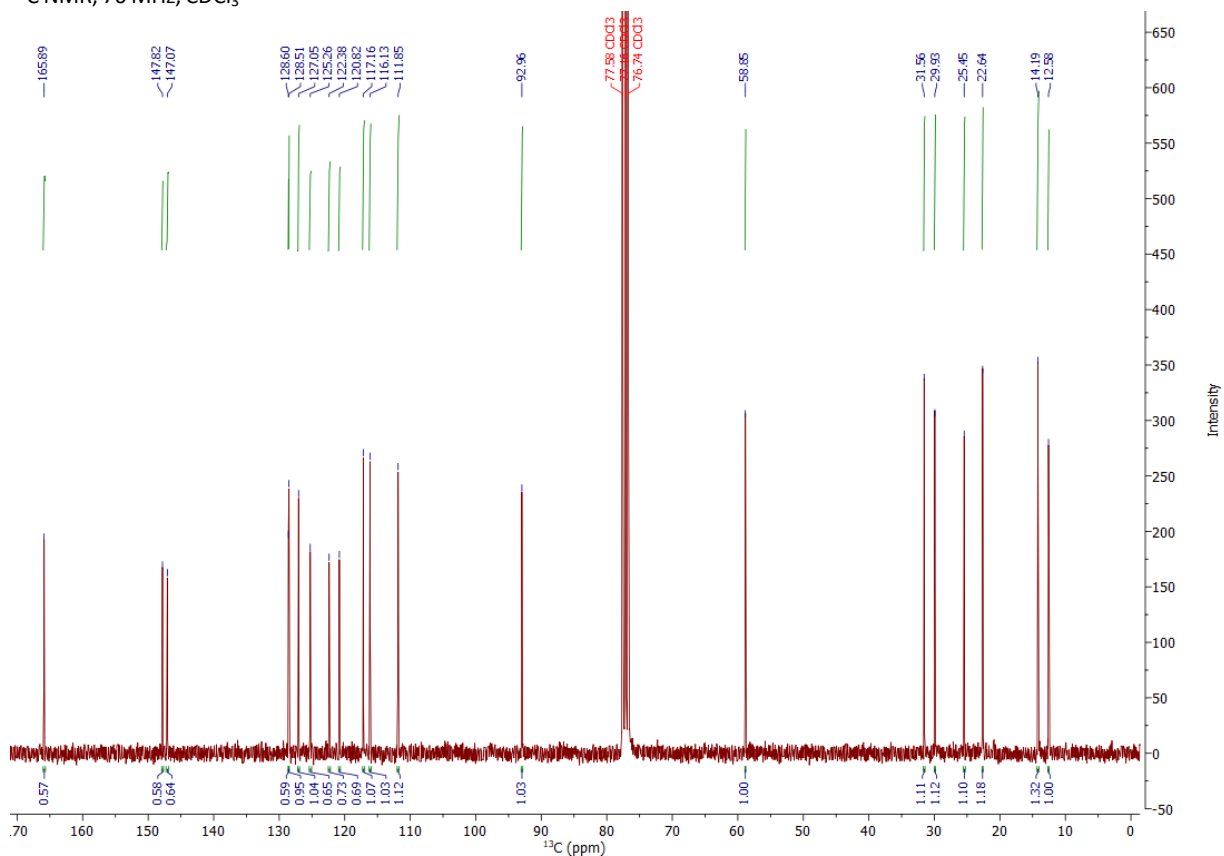

**(Z)-4'-Methoxy-5-methyl-5'-((5-methyl-4-propyl-1H-pyrrol-2-yl)methylene)-1H,5'H-[2,2'-bipyrrol]-1'-ium chloride (16bb)**

<sup>1</sup>H NMR, 300 MHz, CDCl<sub>3</sub>

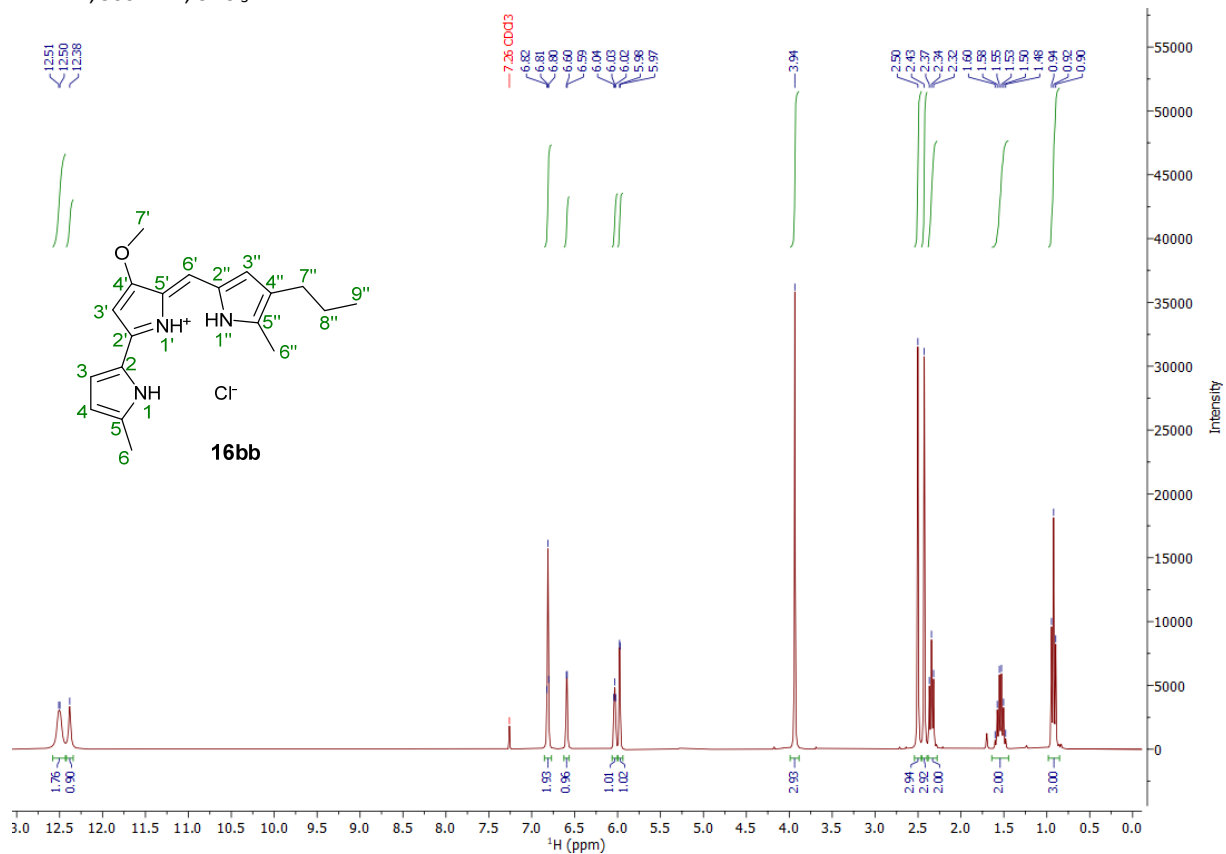

<sup>13</sup>C NMR, 76 MHz, CDCl<sub>3</sub>

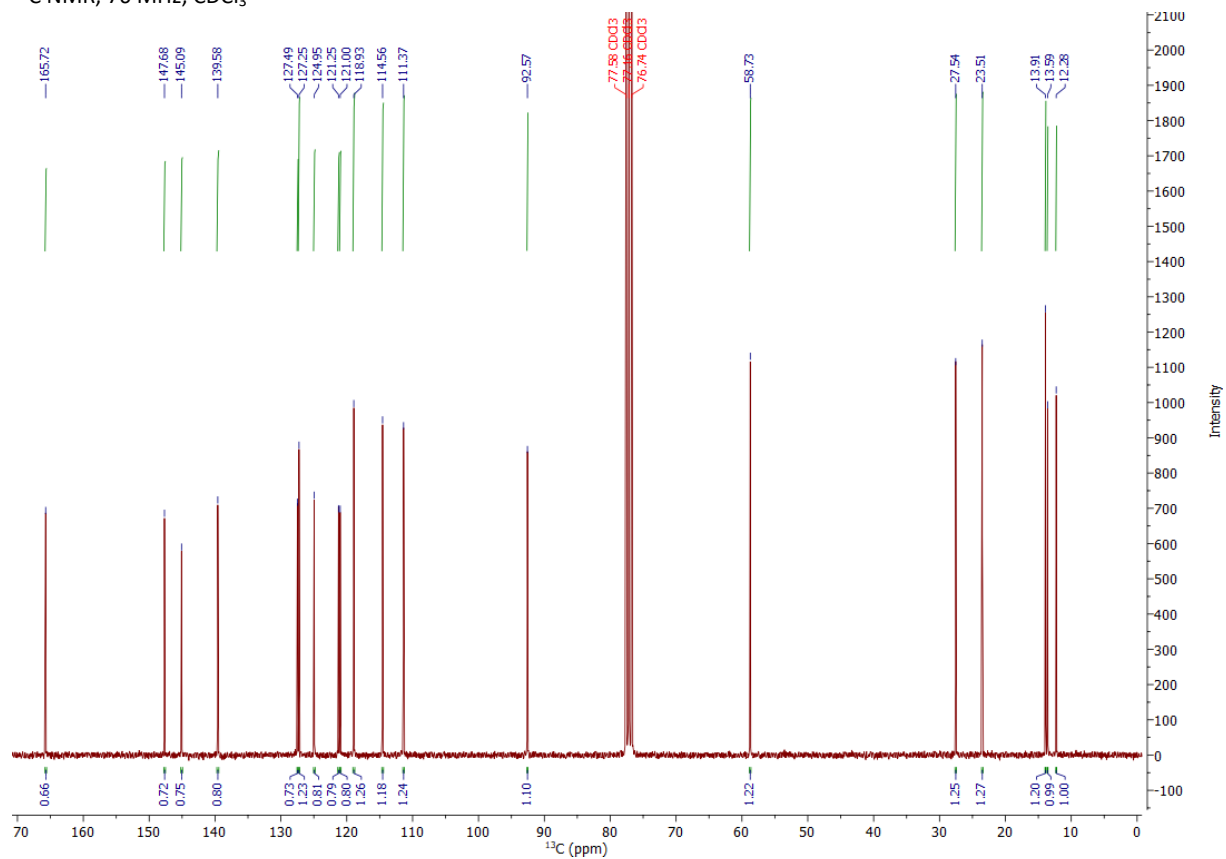

**(Z)-4'-Methoxy-5-methyl-5'-((5-methyl-4-pentyl-1H-pyrrol-2-yl)methylene)-1H,5'H-[2,2'-bipyrrol]-1'-ium chloride (16ba)**

<sup>1</sup>H NMR, 300 MHz, CDCl<sub>3</sub>

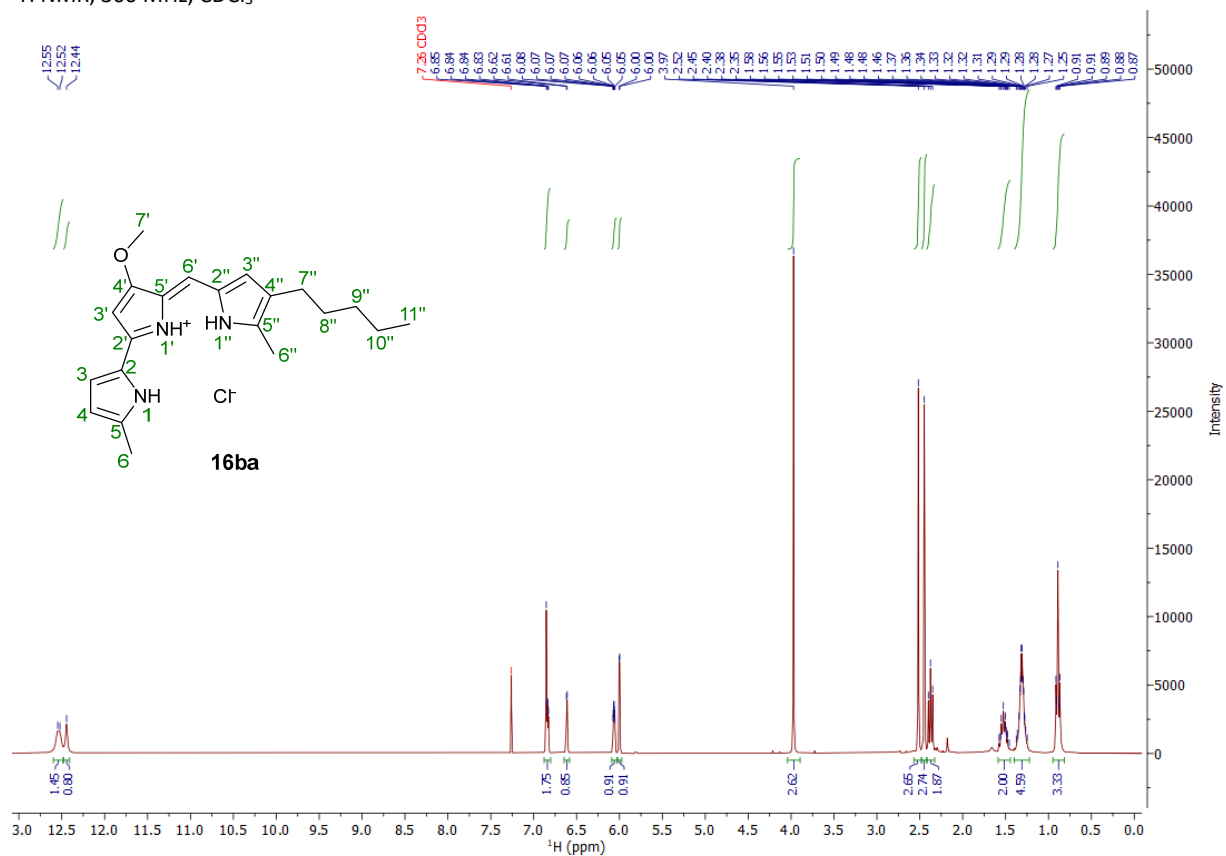

<sup>13</sup>C NMR, 76 MHz, CDCl<sub>3</sub>

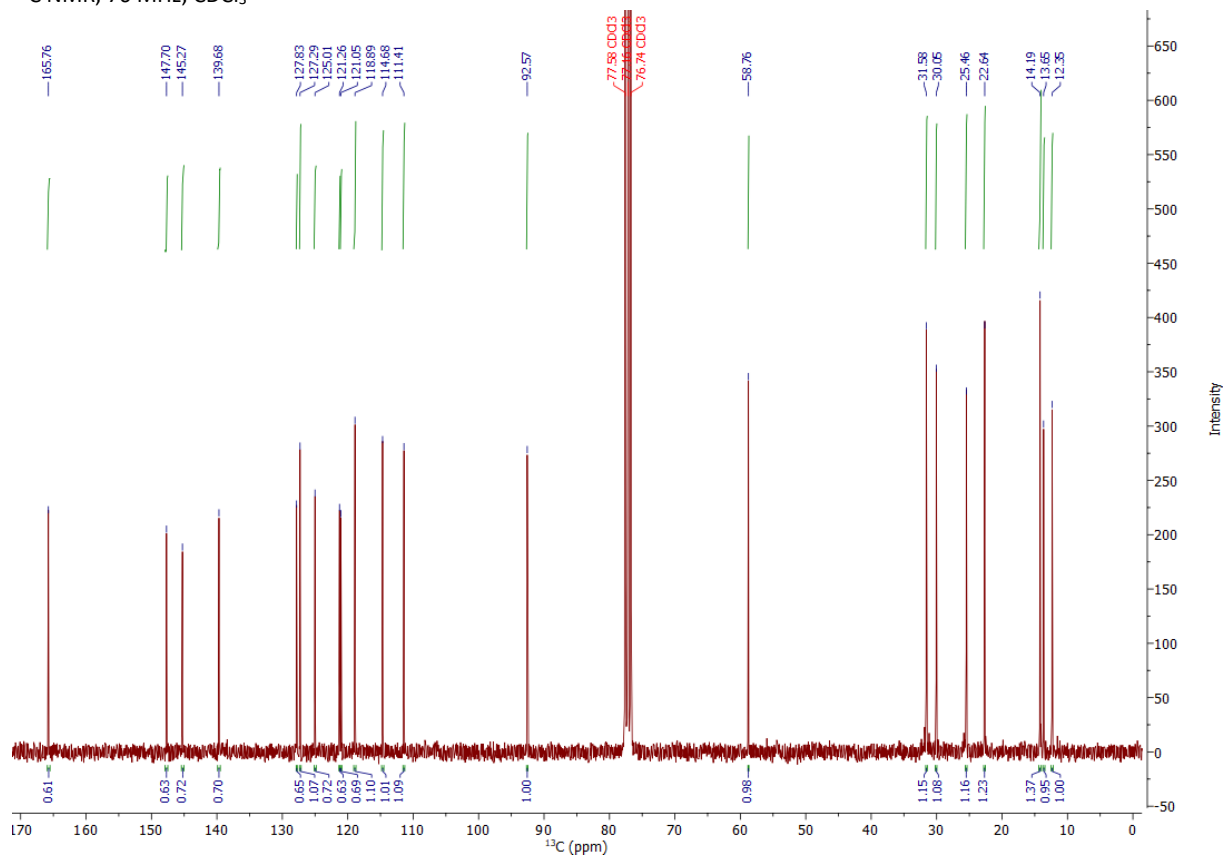

**(Z)-4'-Methoxy-5-methyl-5'-((5-methyl-4-heptyl-1H-pyrrol-2-yl)methylene)-1H,5'H-[2,2'-bipyrrol]-1'-ium chloride (16bc)**

<sup>1</sup>H NMR, 300 MHz, CDCl<sub>3</sub>

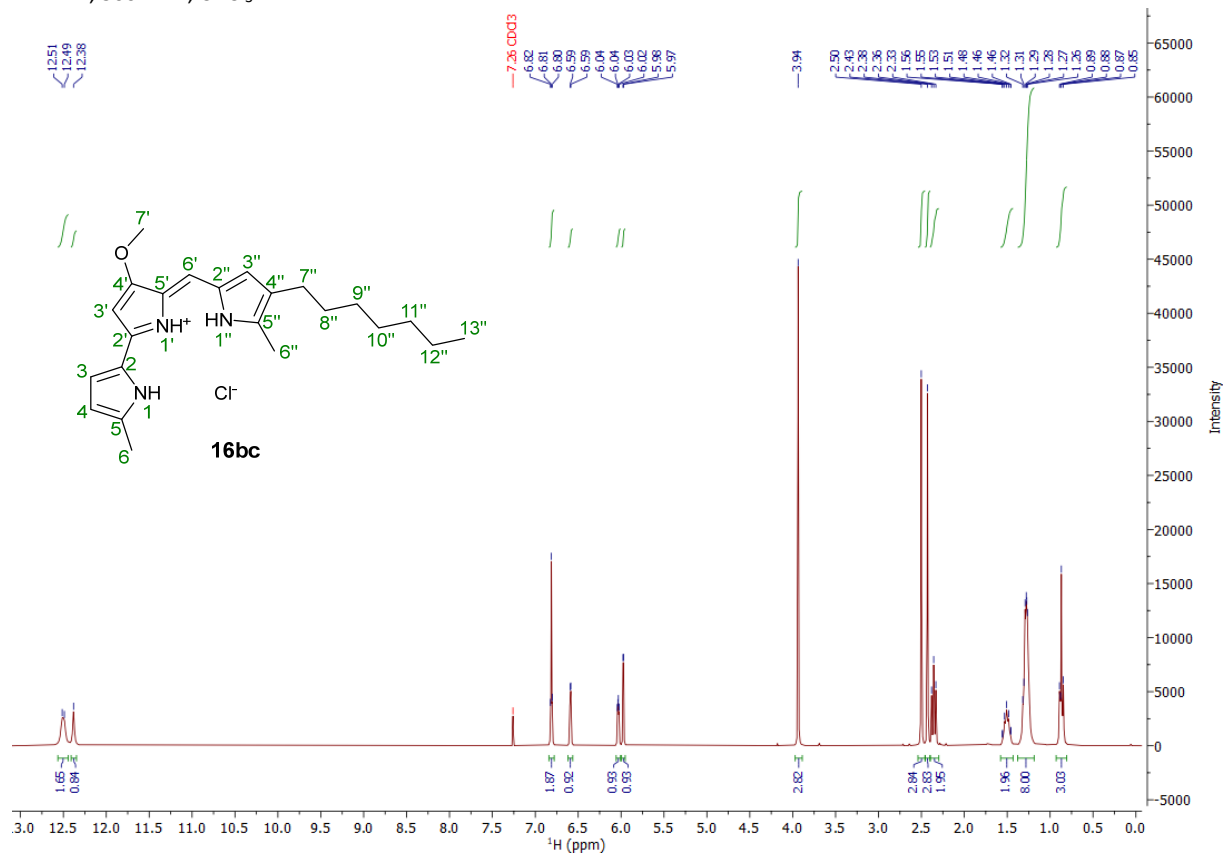

<sup>13</sup>C NMR, 76 MHz, CDCl<sub>3</sub>

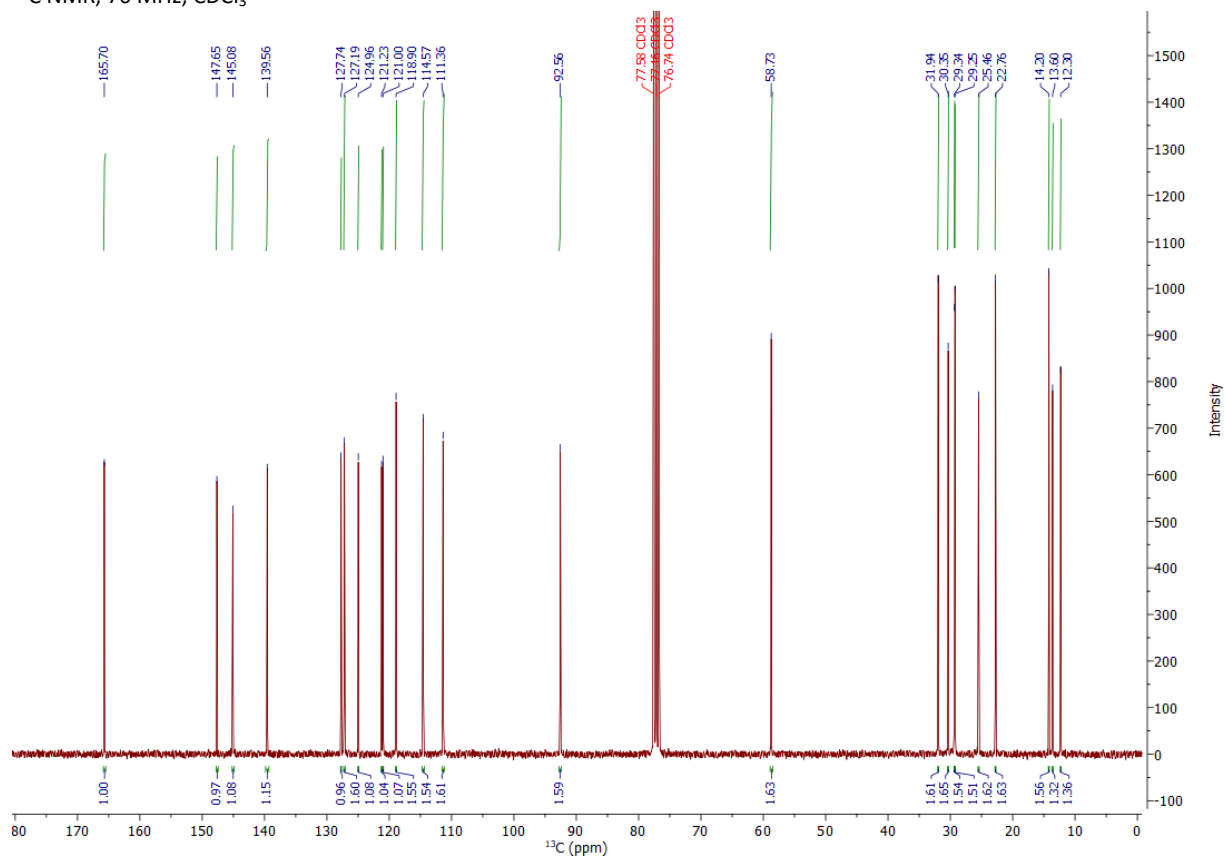



**(Z)-5-Ethyl-4'-methoxy-5'-((5-methyl-4-pentyl-1H-pyrrol-2-yl)methylene)-1H,5'H-[2,2'-bipyrrol]-1'-ium chloride (16ca)**

<sup>1</sup>H NMR, 300 MHz, CDCl<sub>3</sub>

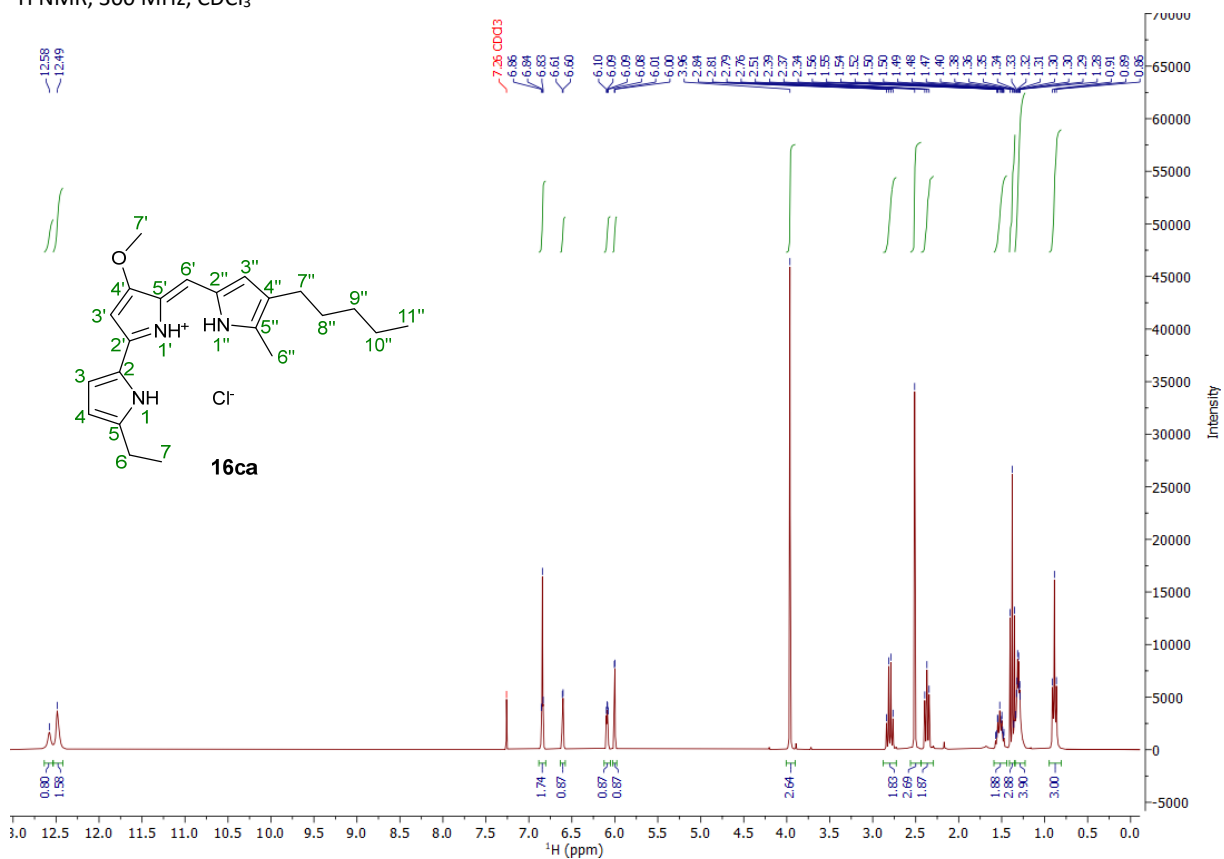

<sup>13</sup>C NMR, 76 MHz, CDCl<sub>3</sub>

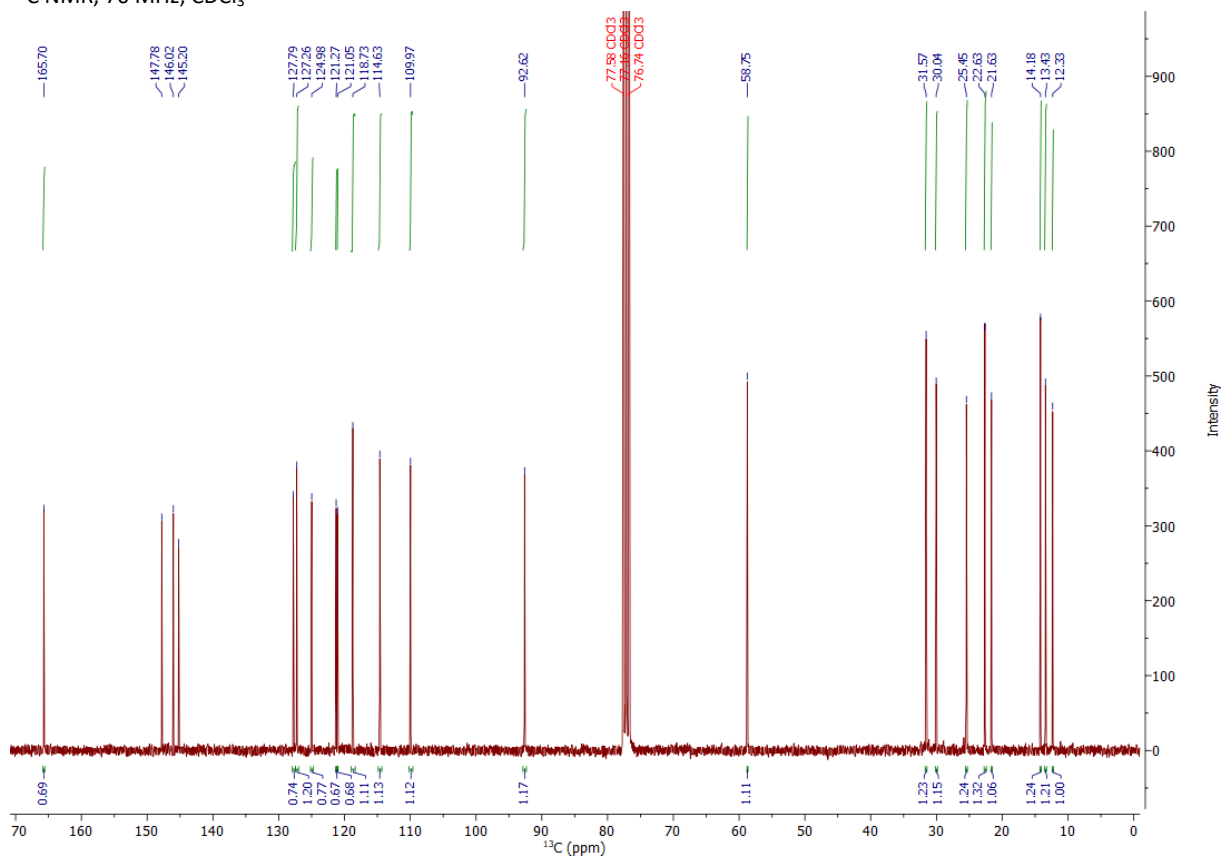

**(Z)-4'-Methoxy-5-propyl-5'-((5-methyl-4-pentyl-1H-pyrrol-2-yl)methylene)-1H,5'H-[2,2'-bipyrrol]-1'-ium chloride (16da)**

<sup>1</sup>H NMR, 300 MHz, CDCl<sub>3</sub>

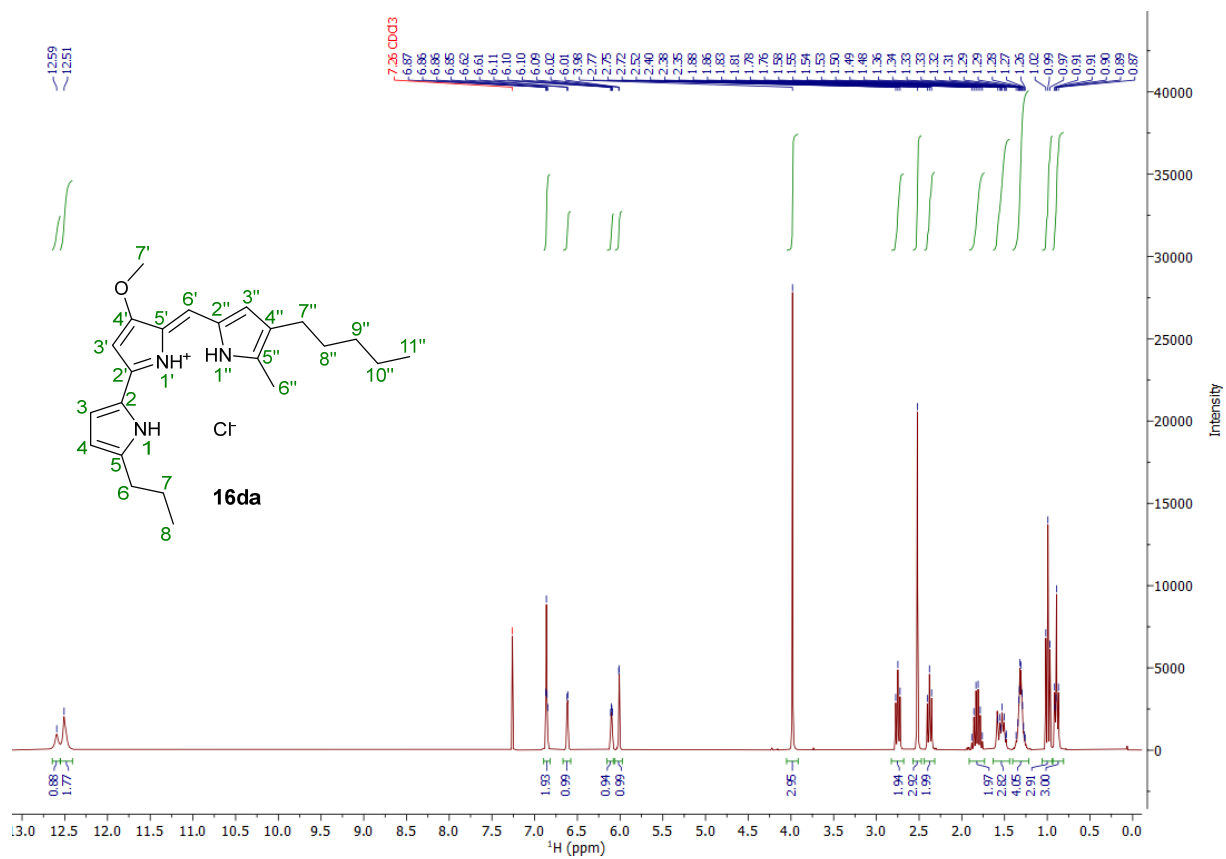

<sup>13</sup>C NMR, 76 MHz, CDCl<sub>3</sub>

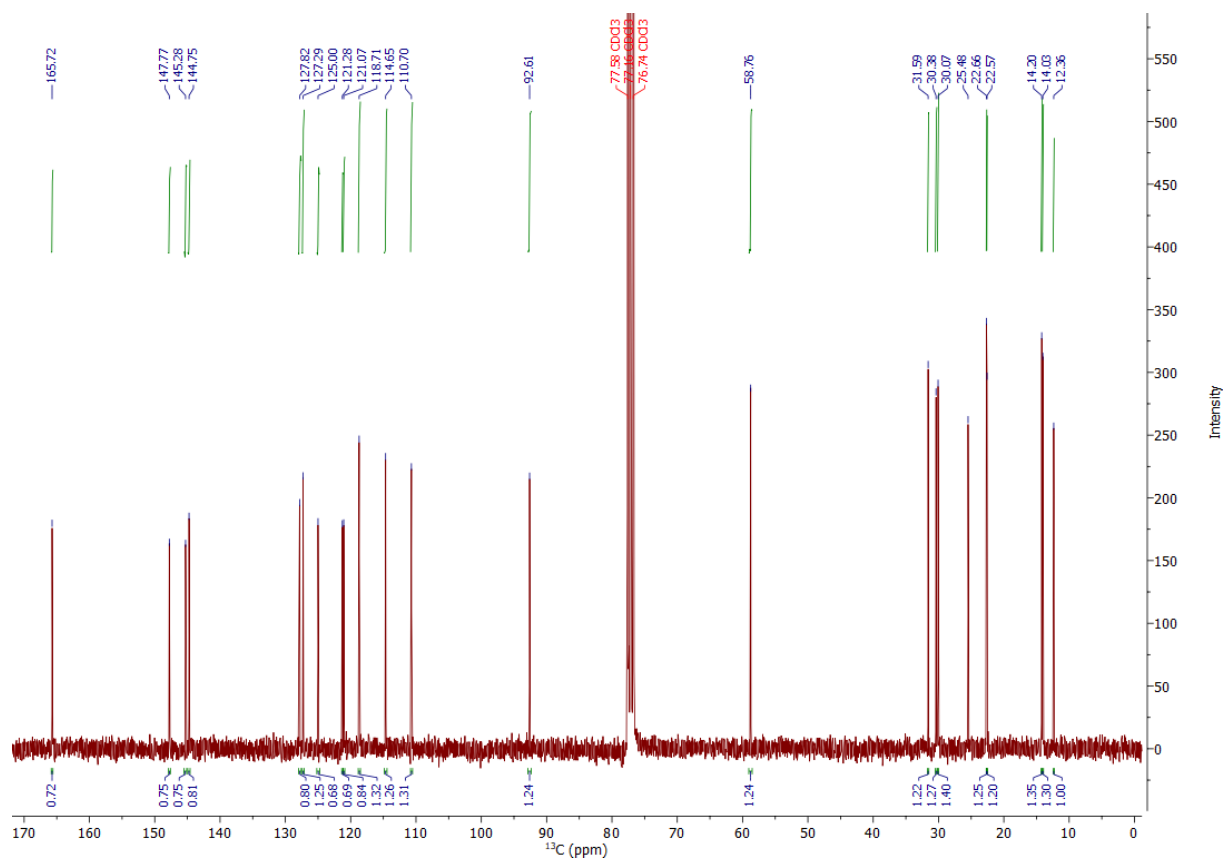

**(Z)-5-Butyl-4'-methoxy-5'-((5-methyl-4-pentyl-1H-pyrrol-2-yl)methylene)-1H,5'H-[2,2'-bipyrrol]-1'-ium chloride (16ea)**

<sup>1</sup>H NMR, 300 MHz, CDCl<sub>3</sub>

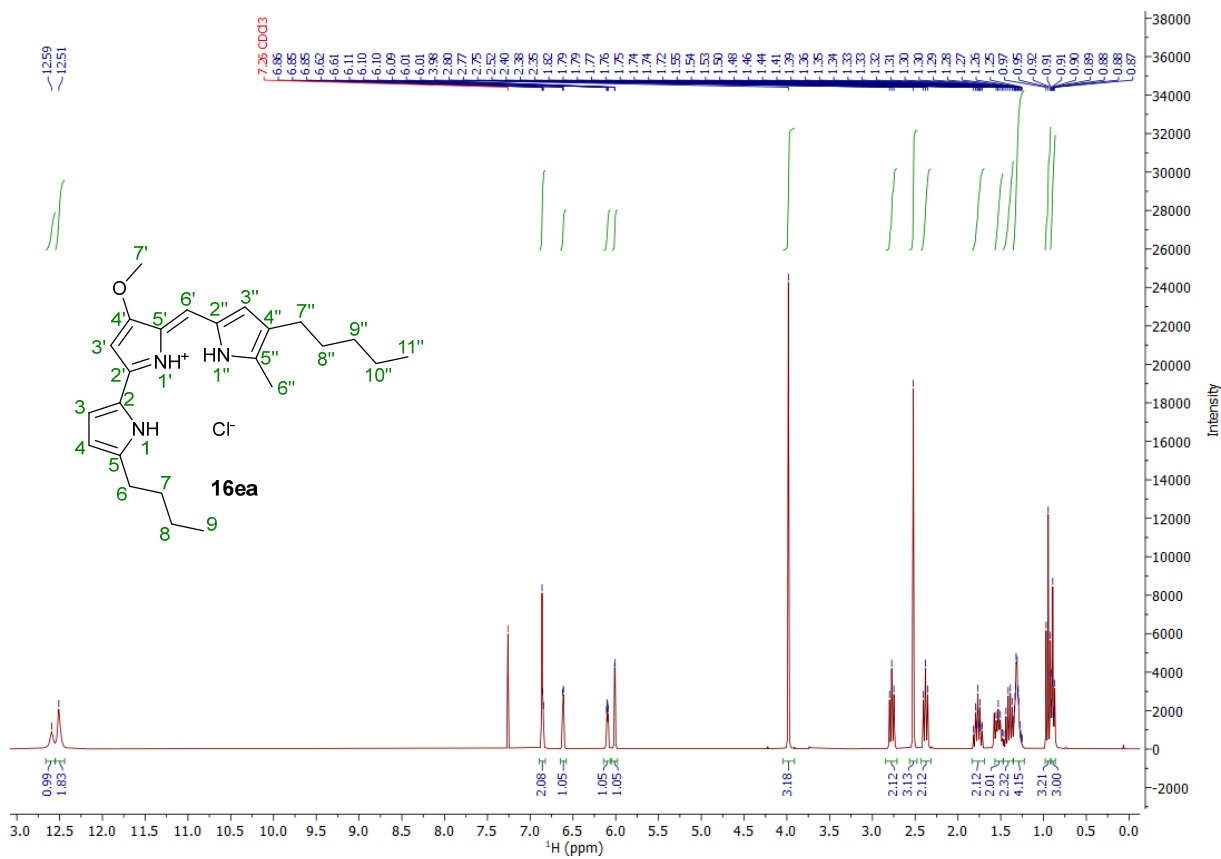

<sup>13</sup>C NMR, 76 MHz, CDCl<sub>3</sub>

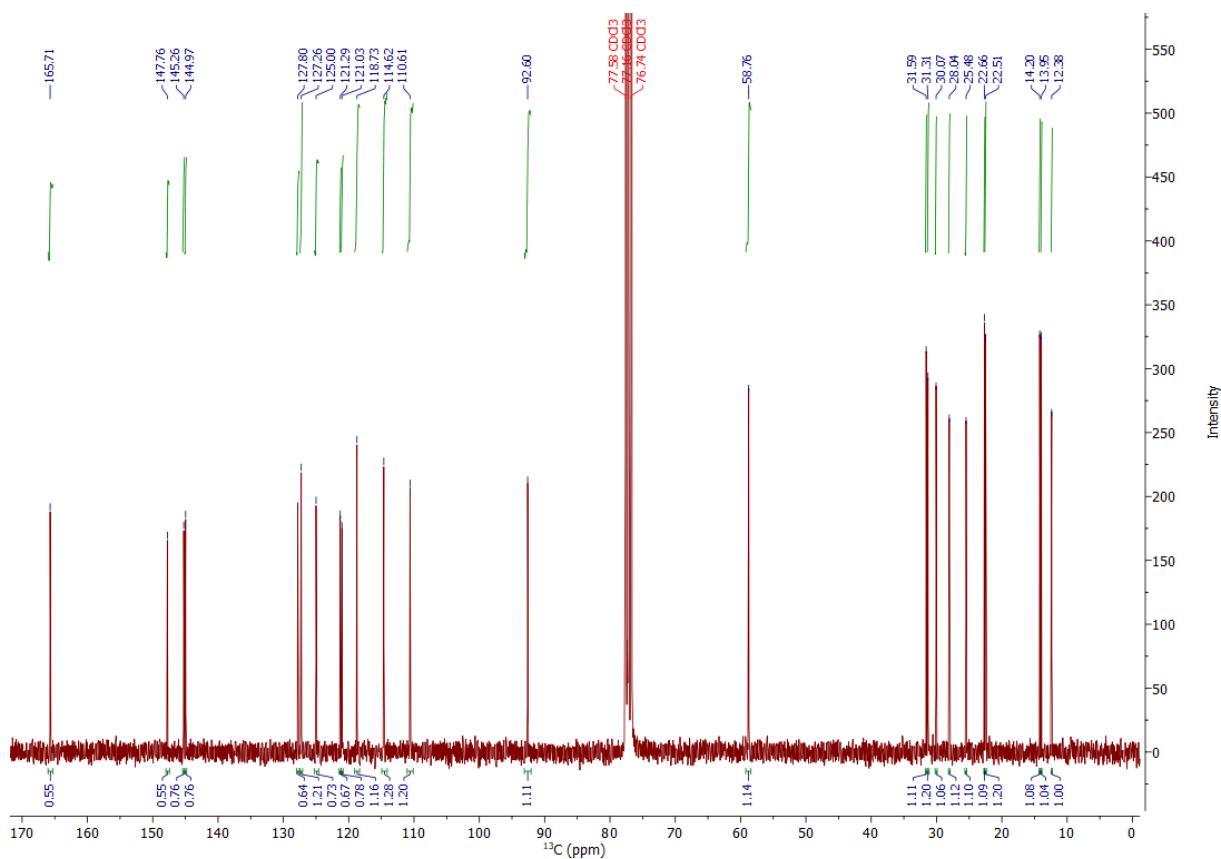

**(Z)-4'-Methoxy-5-pentyl-5'-((5-methyl-4-pentyl-1H-pyrrol-2-yl)methylene)-1H,5'H-[2,2'-bipyrrol]-1'-ium chloride (16fa)**

$^1\text{H}$  NMR, 300 MHz,  $\text{CDCl}_3$

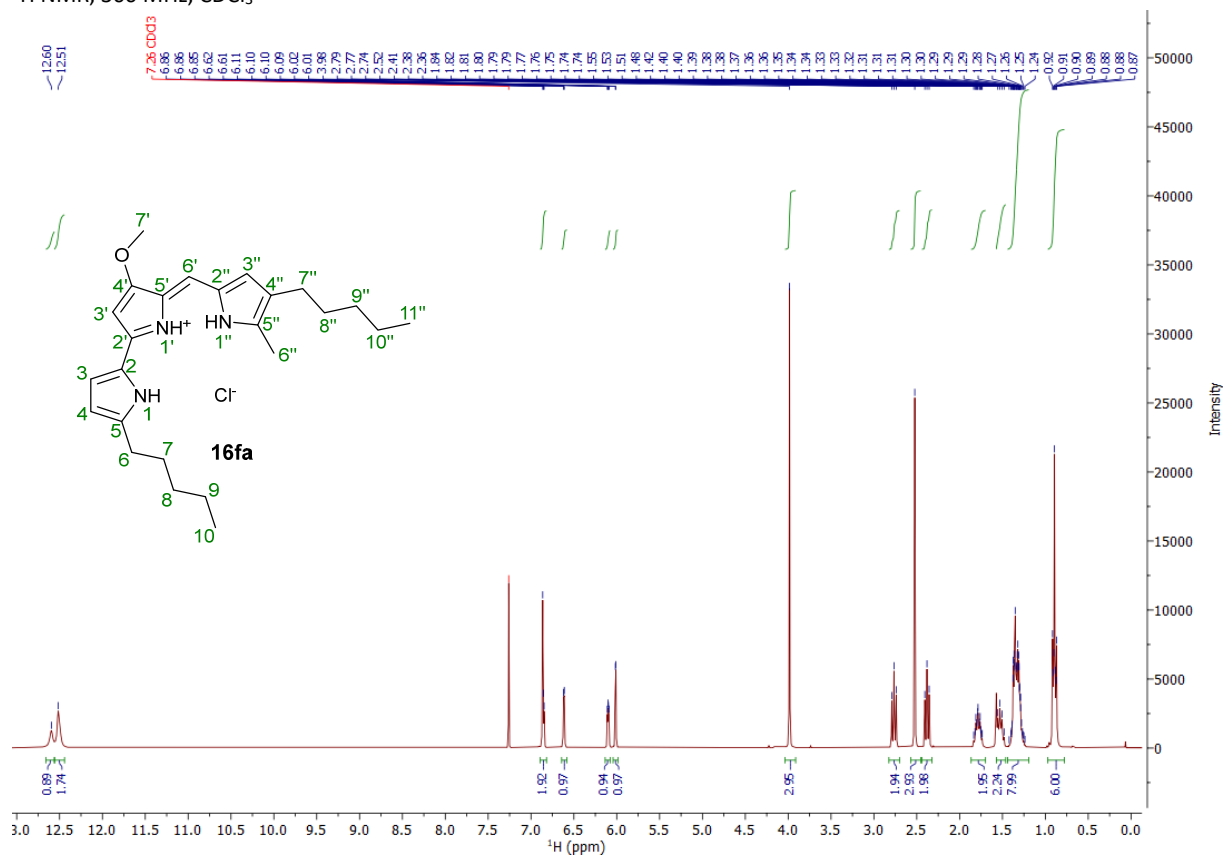

$^{13}\text{C}$  NMR, 76 MHz,  $\text{CDCl}_3$

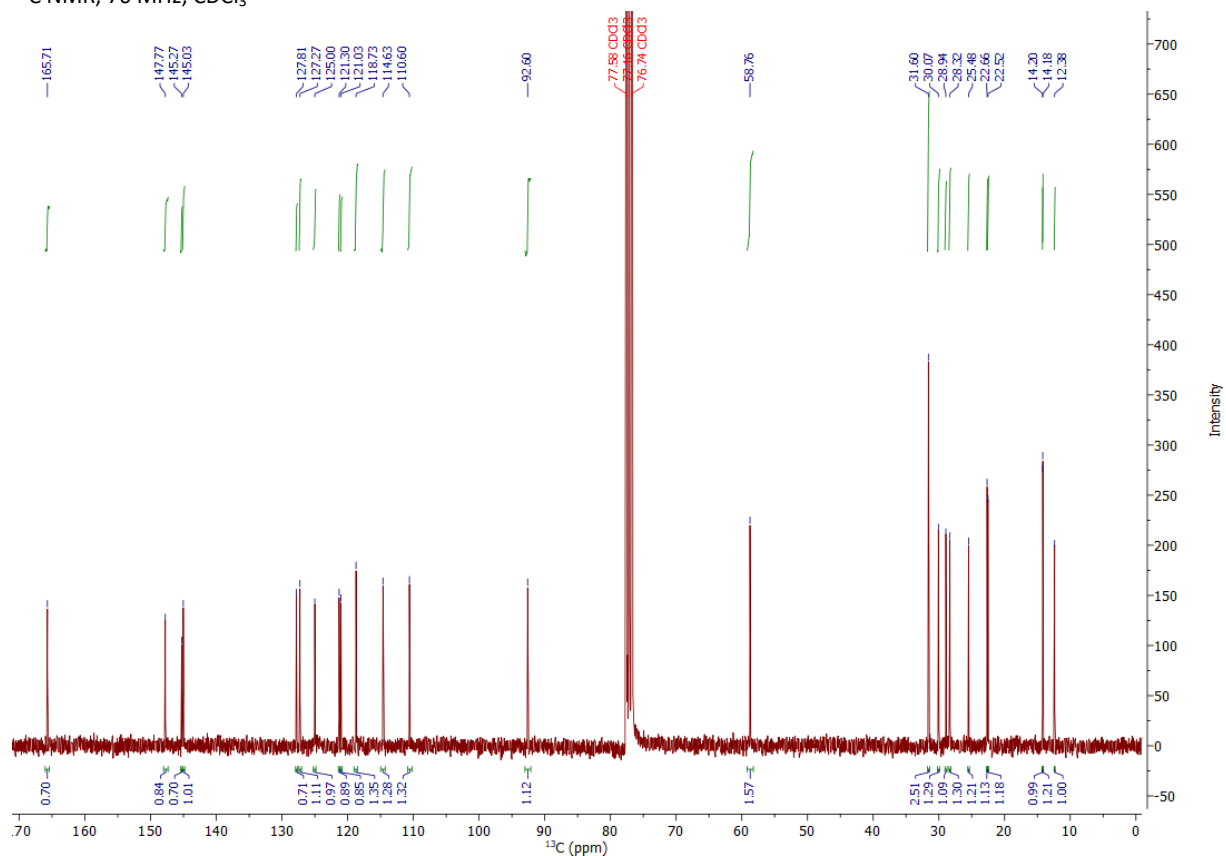

**(Z)-5-Hexyl-4'-methoxy-5'-((5-methyl-4-pentyl-1H-pyrrol-2-yl)methylene)-1H,5'H-[2,2'-bipyrrol]-1'-ium chloride (16ga)**

<sup>1</sup>H NMR, 300 MHz, CDCl<sub>3</sub>

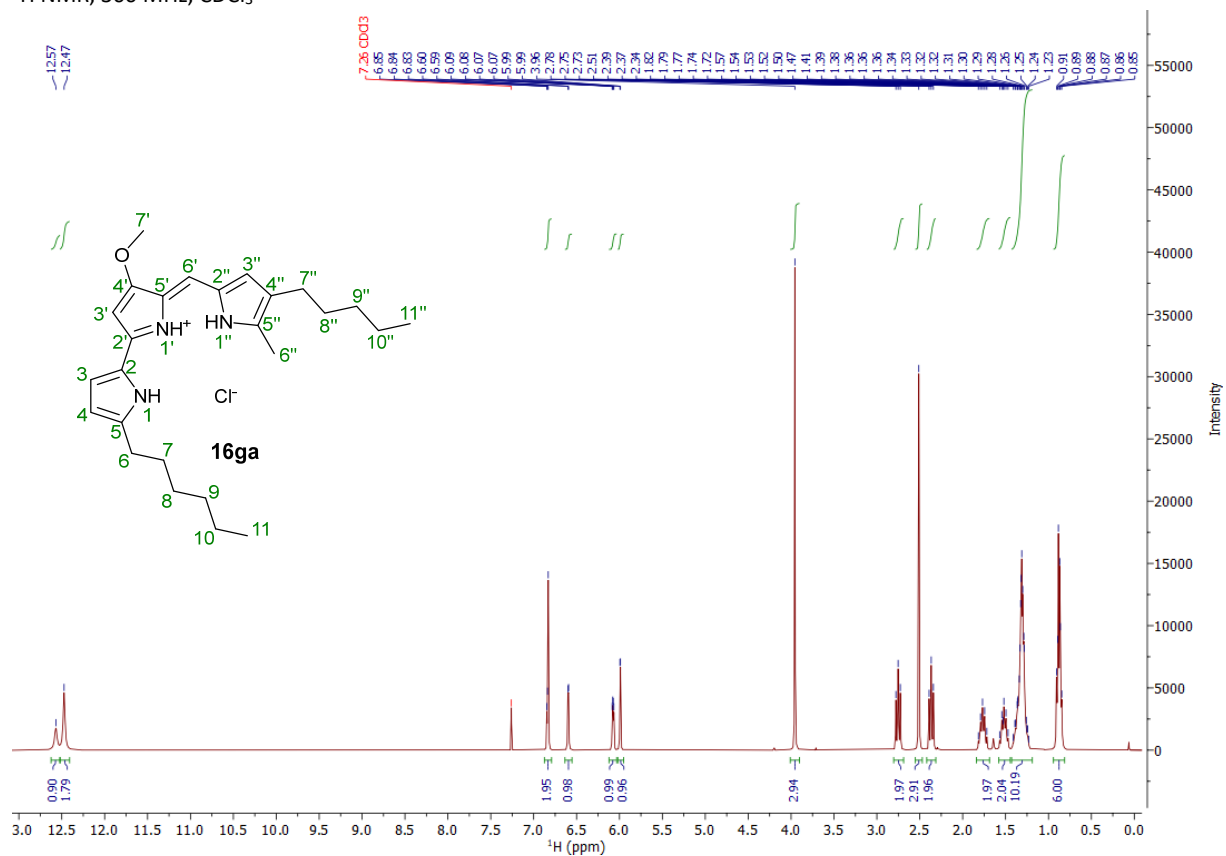

<sup>13</sup>C NMR, 76 MHz, CDCl<sub>3</sub>

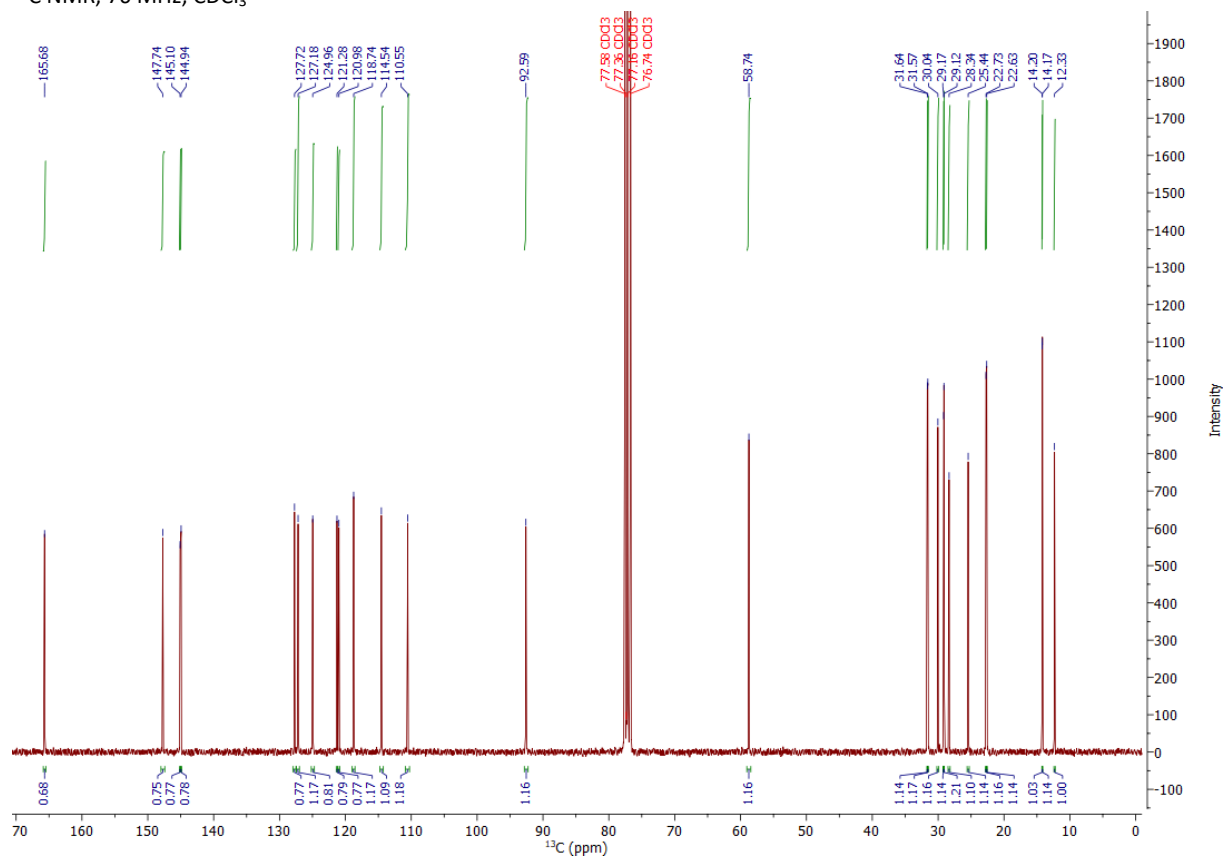

## 11. LC-MS Chromatograms – Synthetic References

### MBC Derivatives

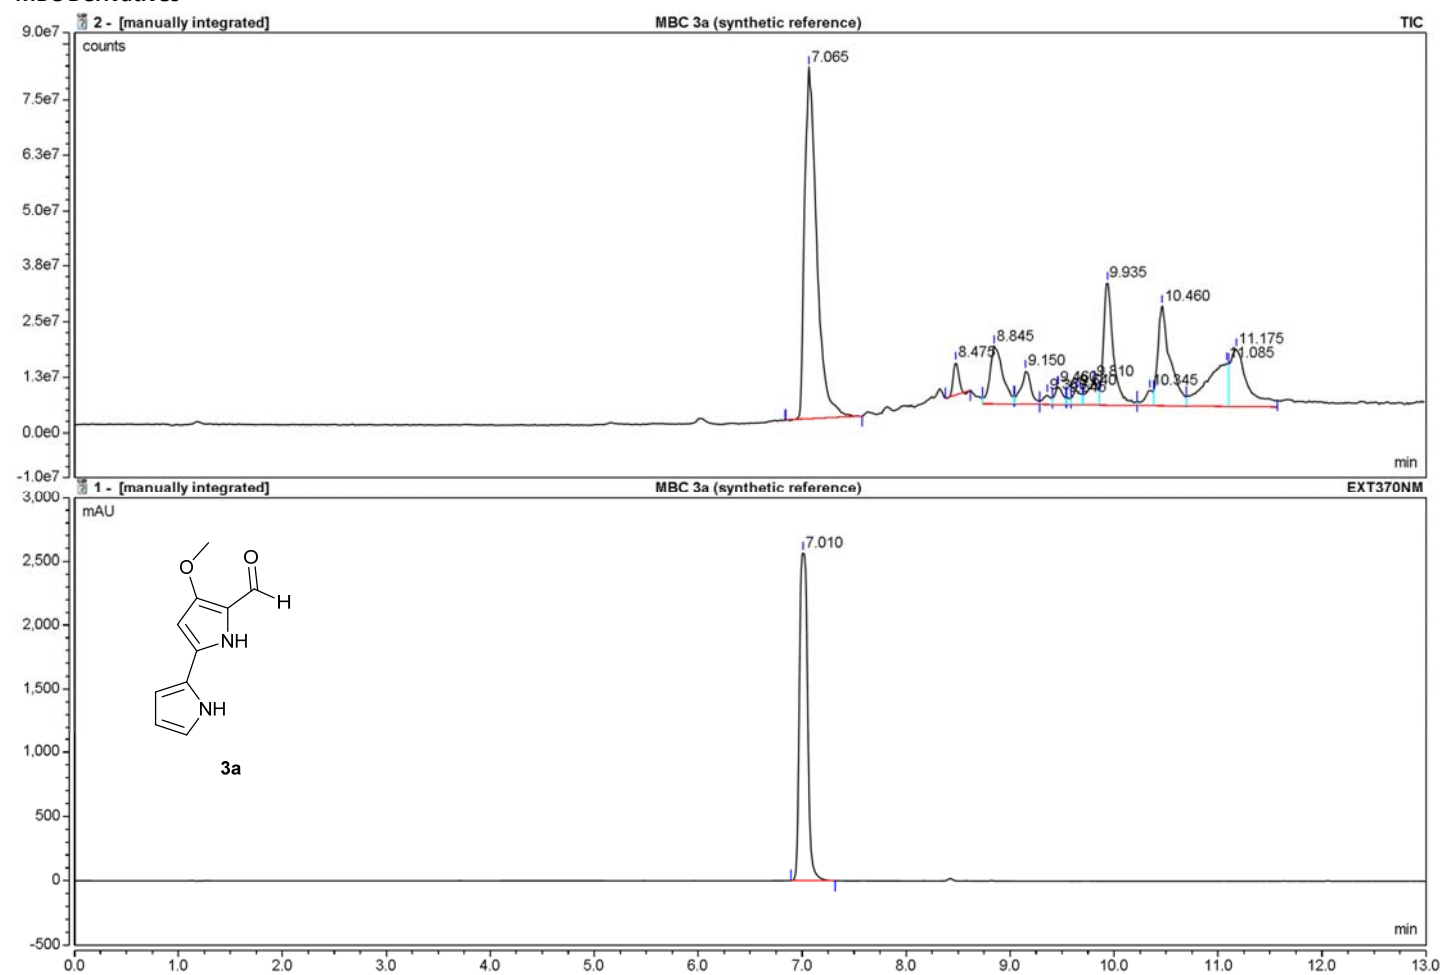

Figure S4: LC-MS data [total ion chromatogram (TIC, top) and UV<sub>370</sub> trace (bottom)] of chemically synthesised MBC 3a. Retention time  $t_R$  7.01 min.

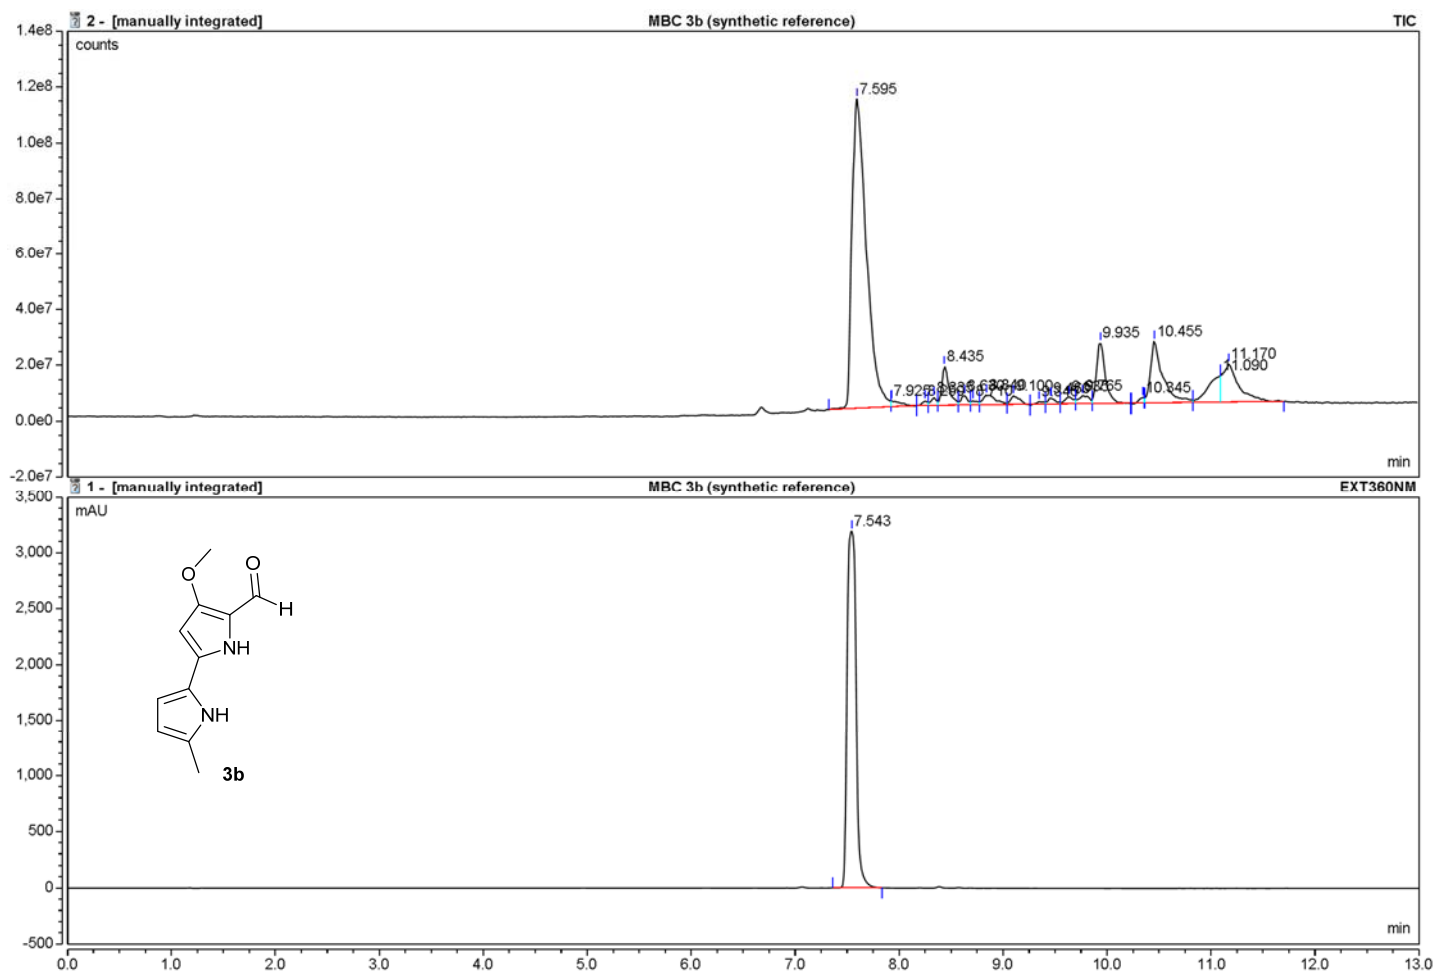

Figure S5: LC-MS data [TIC (top) and UV<sub>360</sub> trace (bottom)] of chemically synthesised 5'-methyl-MBC **3b**. Retention time  $t_R$  7.54 min.

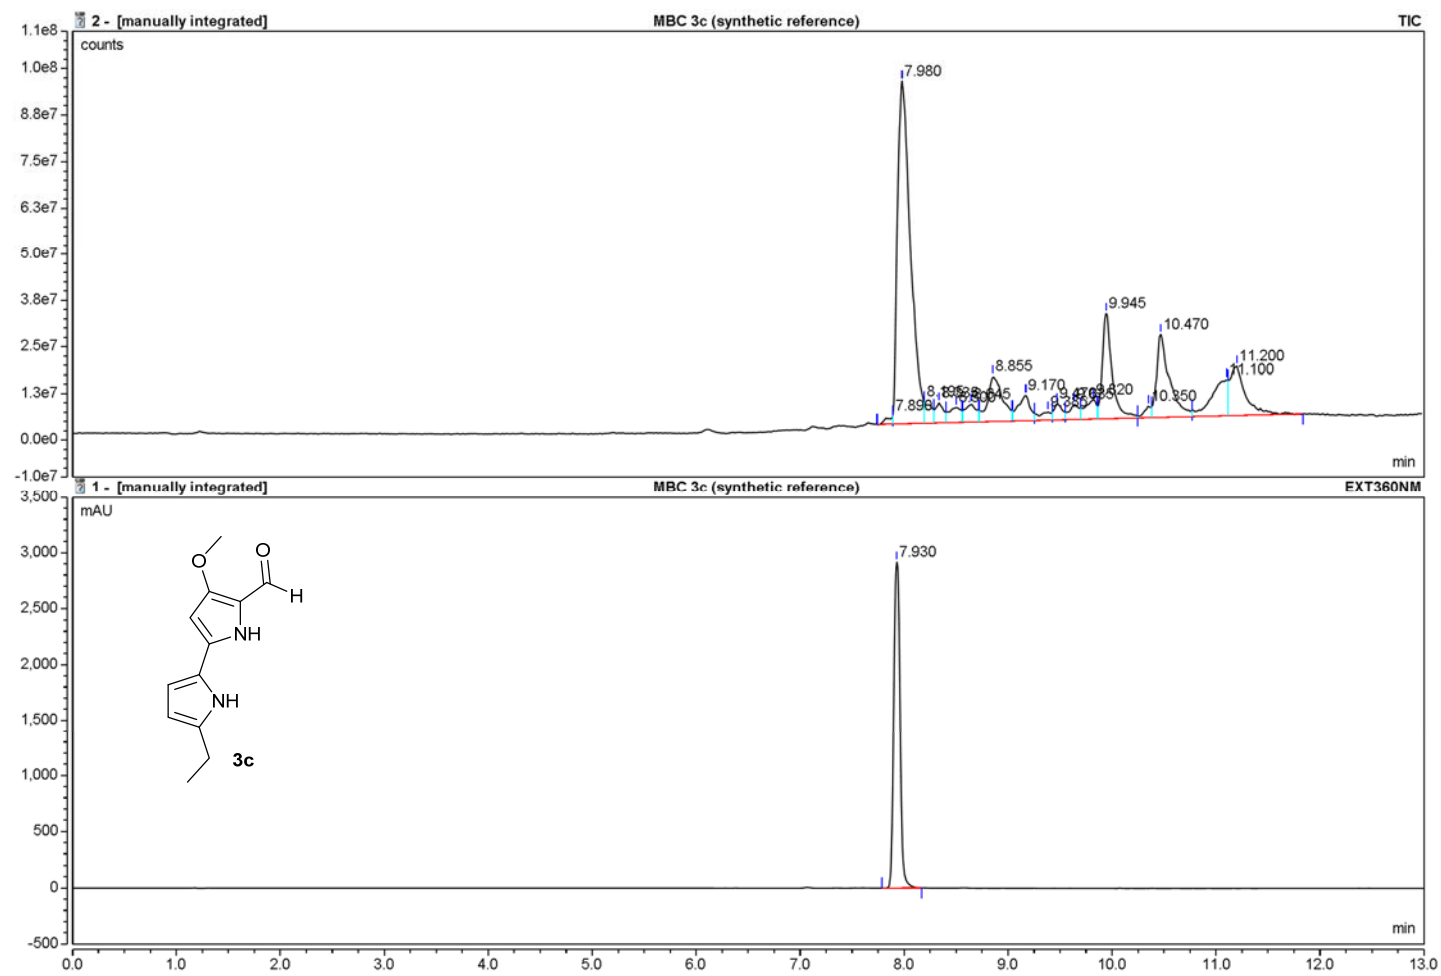

Figure S6: LC-MS data [TIC (top) and UV<sub>360</sub> trace (bottom)] of chemically synthesised 5'-ethyl-MBC **3c**. Retention time  $t_R$  7.93 min.



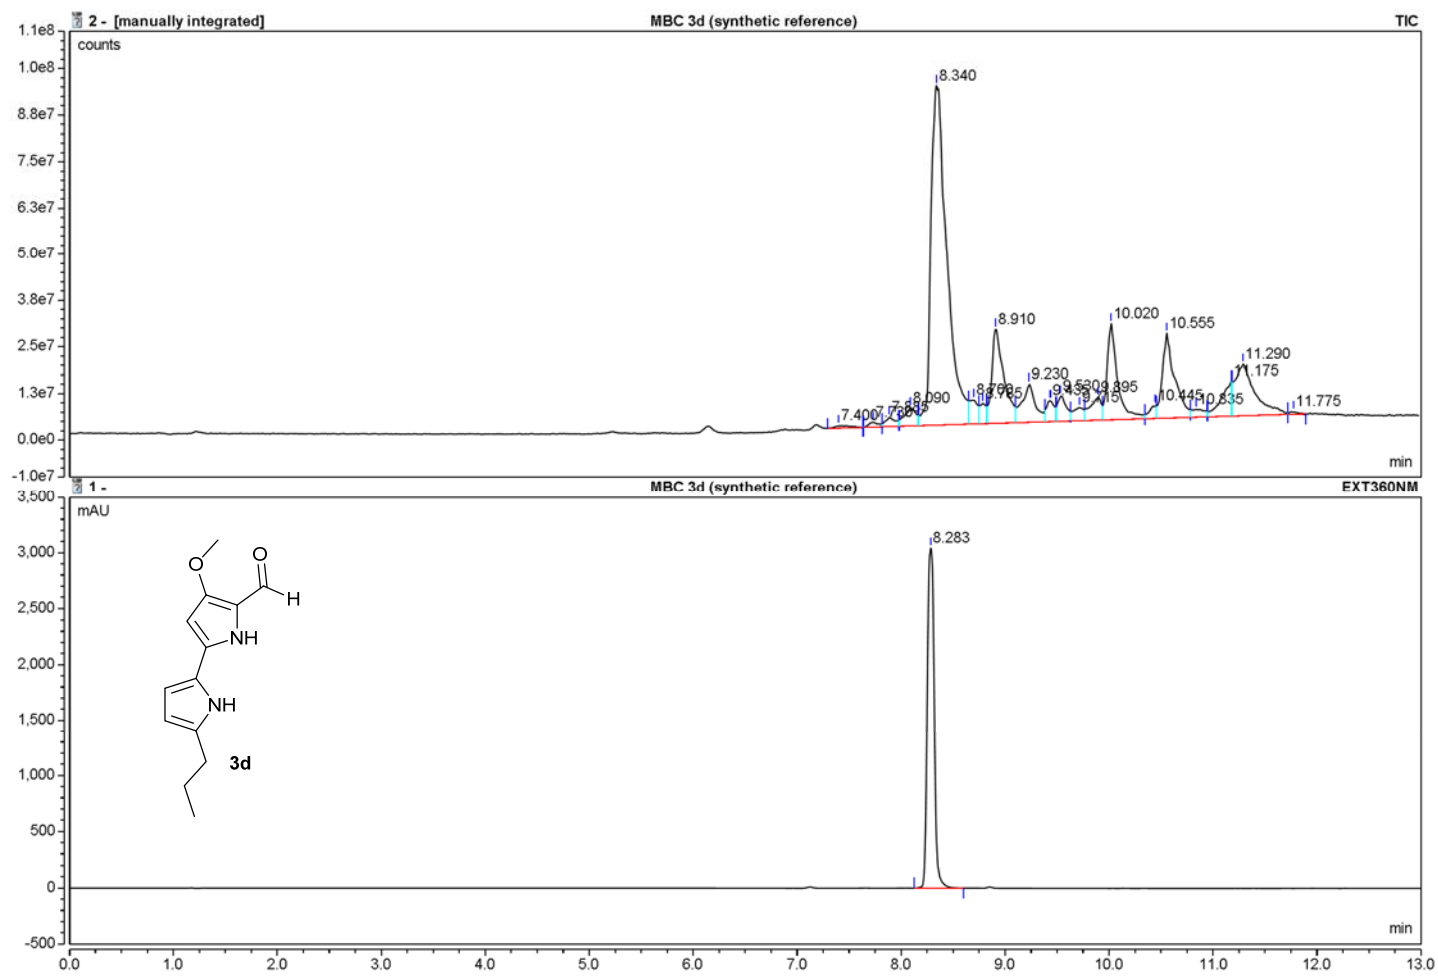

Figure S7: LC-MS data [TIC (top) and UV<sub>360</sub> trace (bottom)] of chemically synthesised 5'-propyl-MBC **3d**. Retention time  $t_R$  8.28 min.

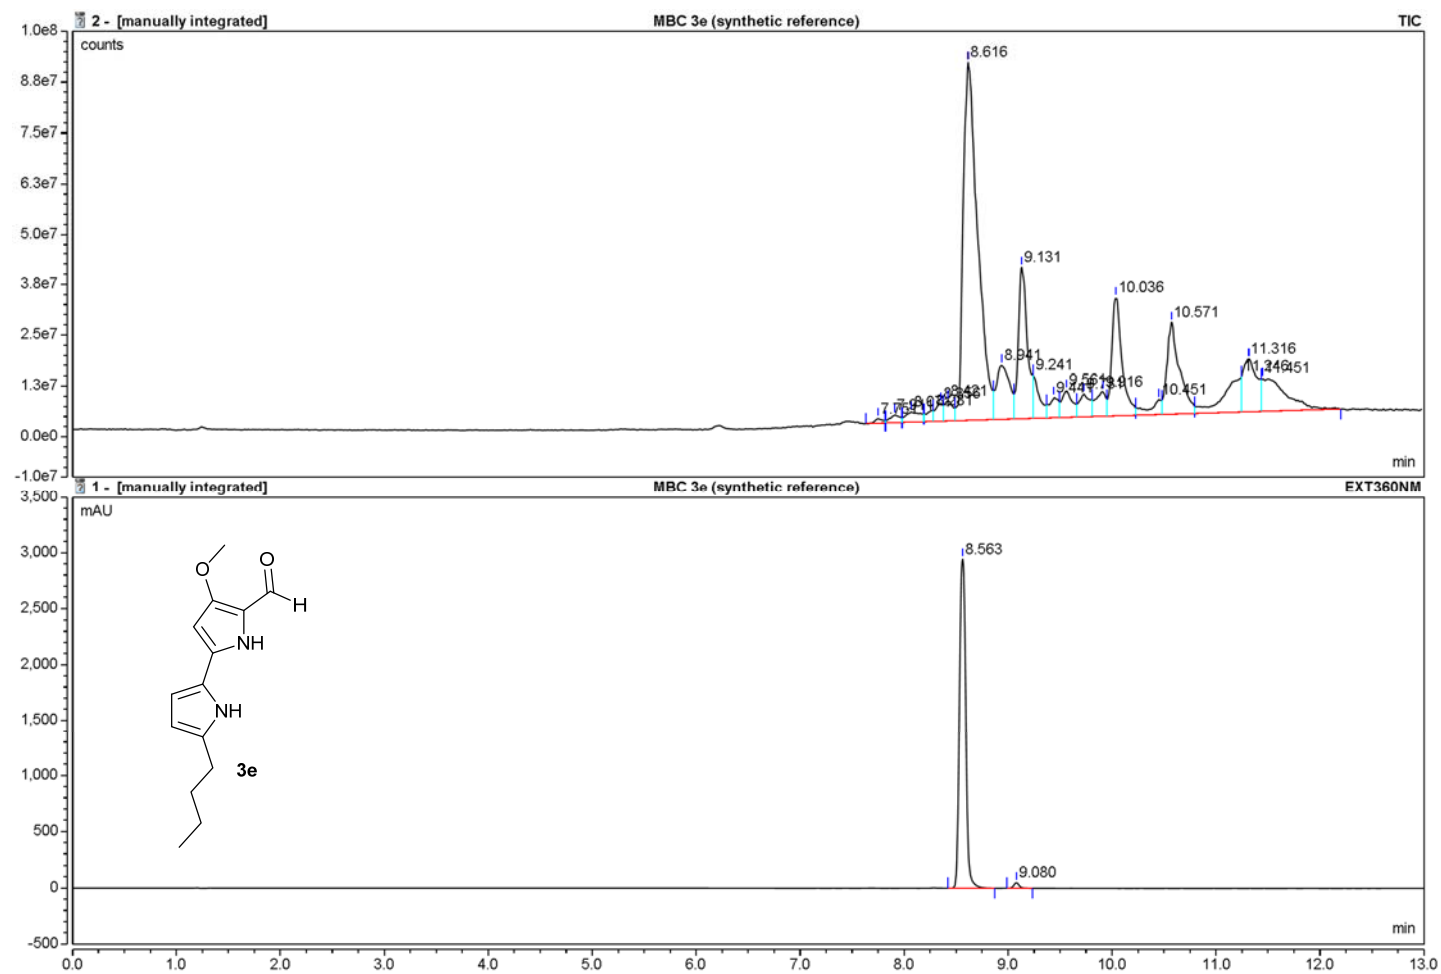

Figure S8: LC-MS data [TIC (top) and UV<sub>360</sub> trace (bottom)] of chemically synthesised 5'-butyl-MBC **3e**. Retention time  $t_R$  8.56 min.

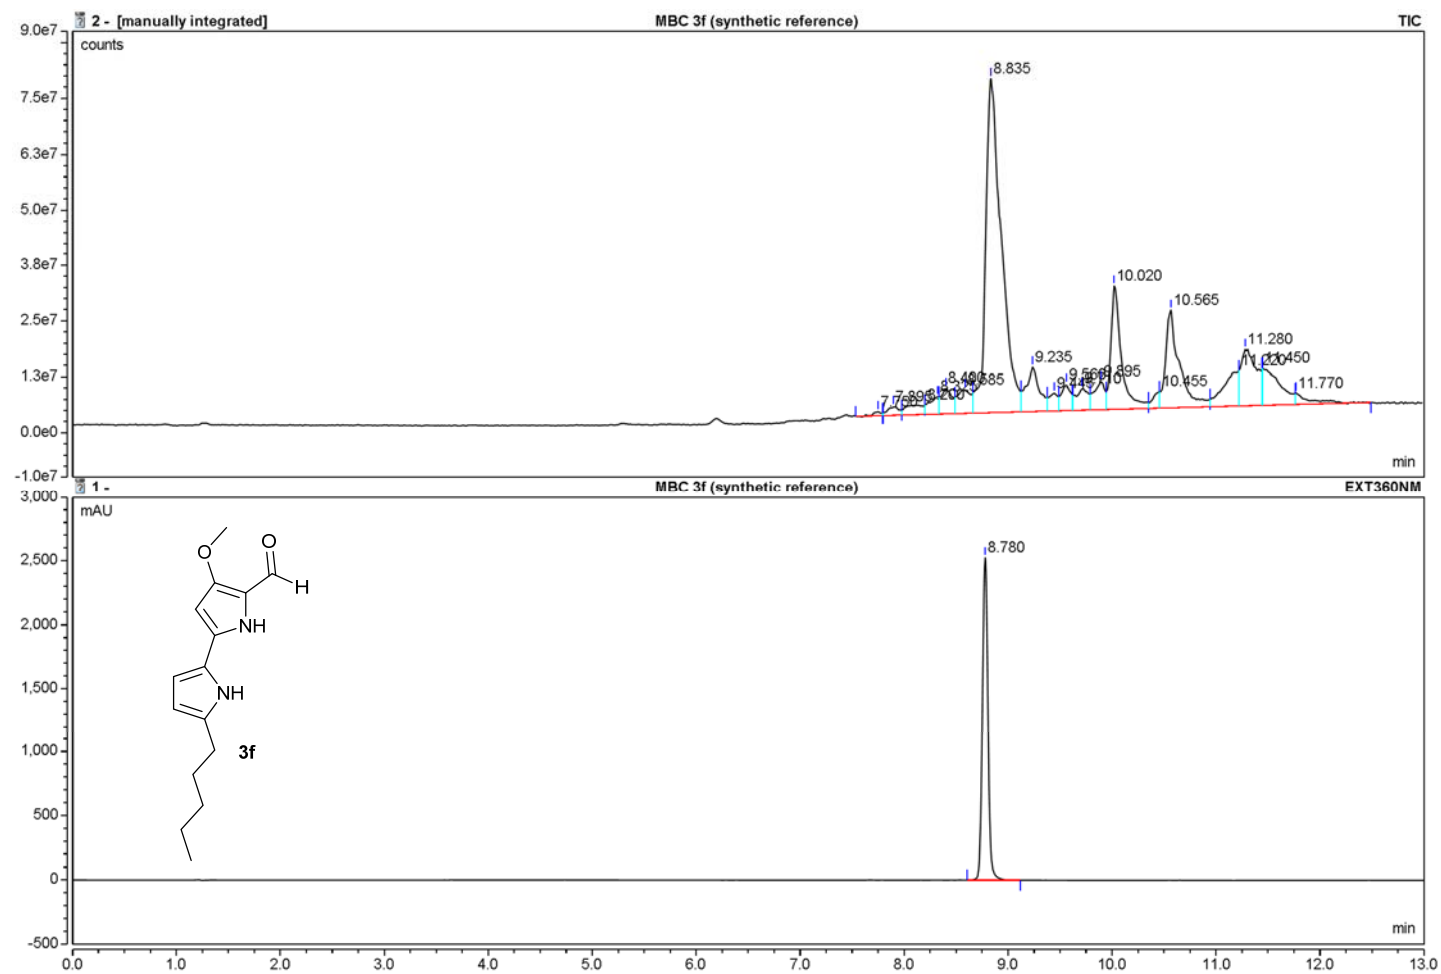

Figure S9: LC-MS data [TIC (top) and UV<sub>360</sub> trace (bottom)] of chemically synthesised 5'-pentyl-MBC **3f**. Retention time  $t_R$  8.78 min.

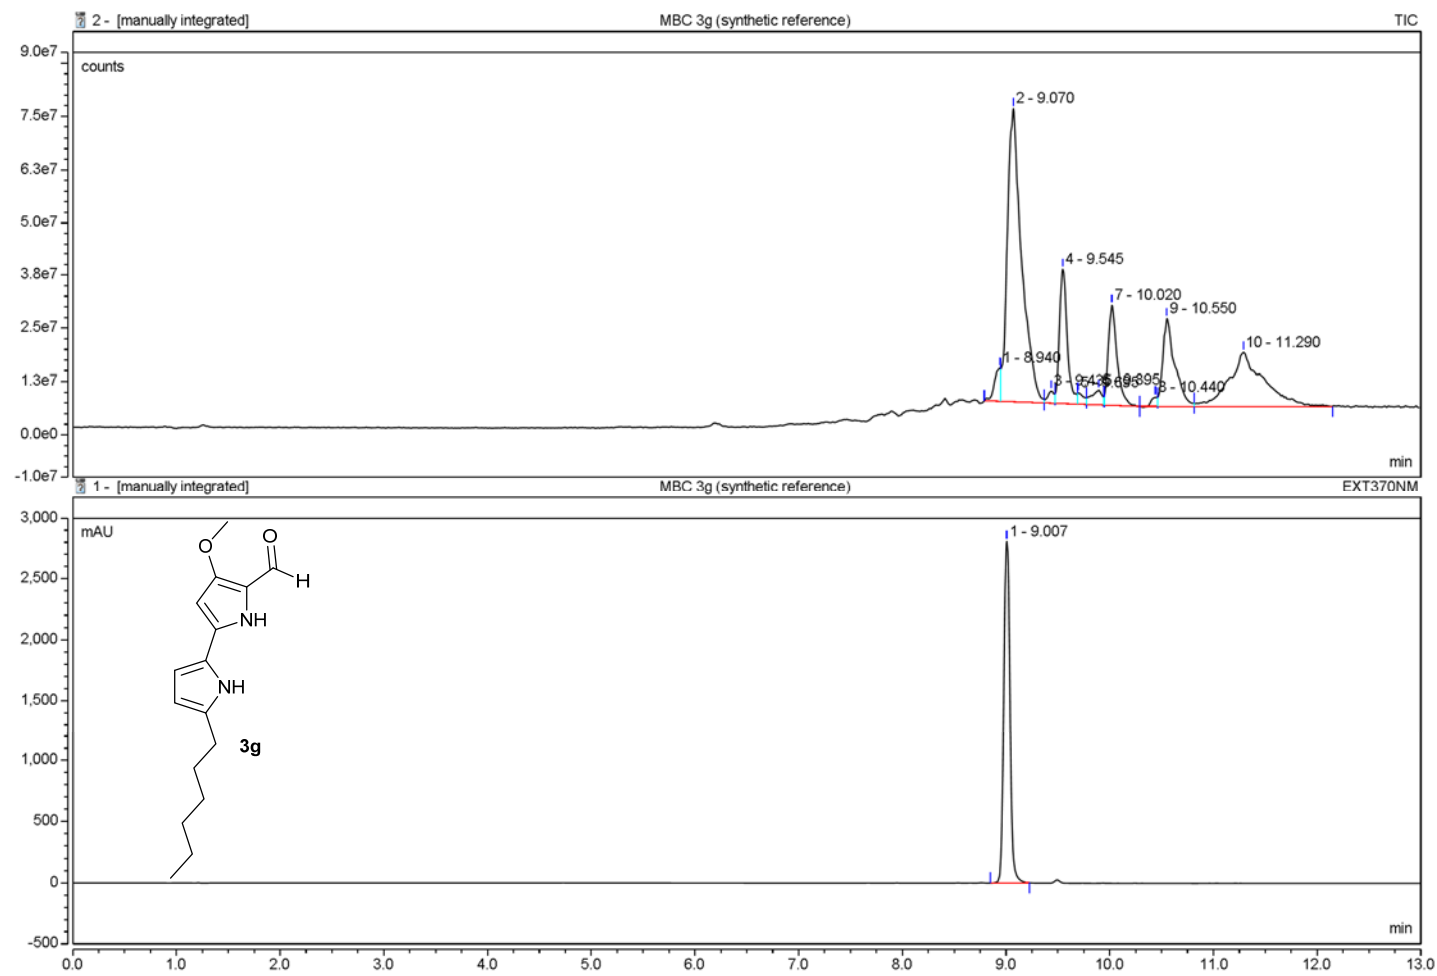

Figure S10: LC-MS data [TIC (top) and UV<sub>370</sub> trace (bottom)] of chemically synthesised 5'-hexyl-MBC **3g**. Retention time  $t_R$  9.07 min.

## Pyrroles

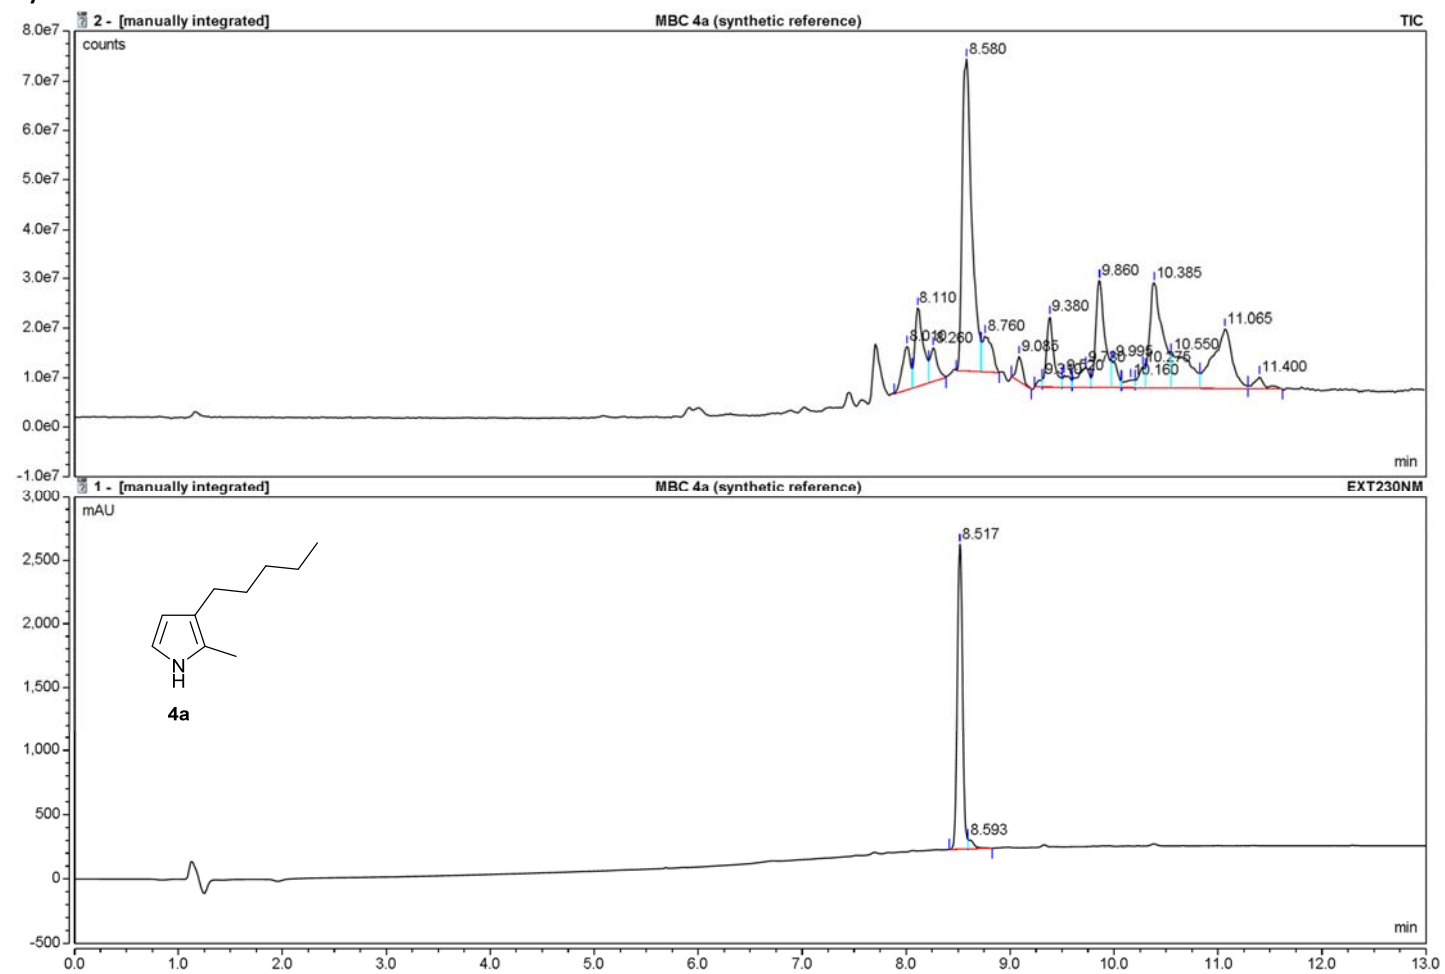

Figure S11: LC-MS data [TIC (top) and UV<sub>230</sub> trace (bottom)] of chemically synthesised monopyrrole **4a**. Retention time  $t_R$  8.52 min.

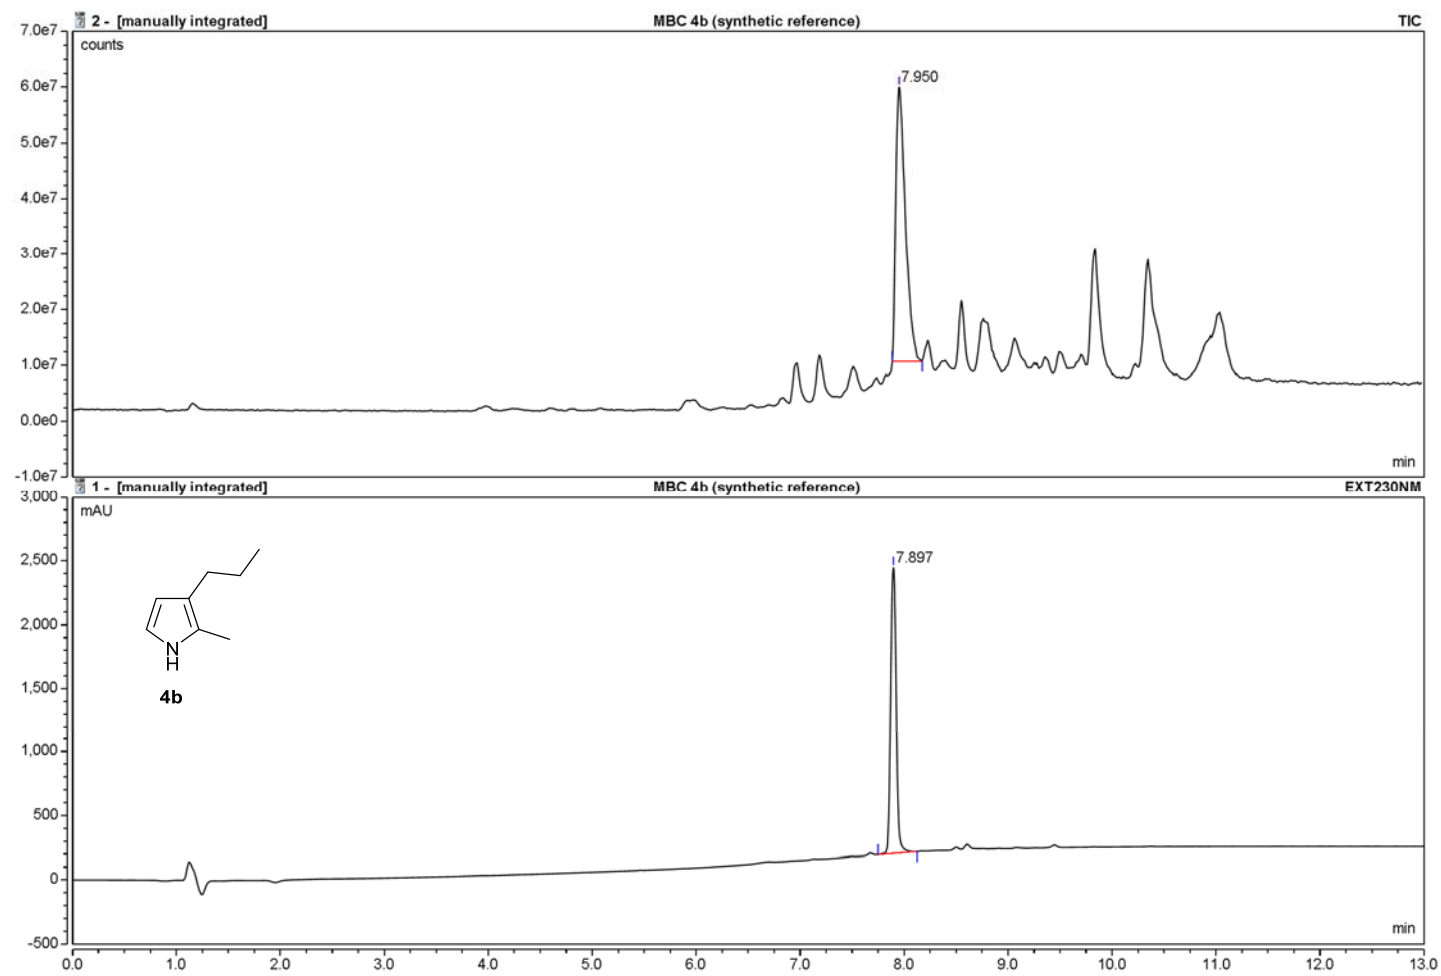

Figure S12: LC-MS data [TIC (top) and UV<sub>230</sub> trace (bottom)] of chemically synthesised monopyrrole **4b**. Retention time  $t_R$  7.90 min.

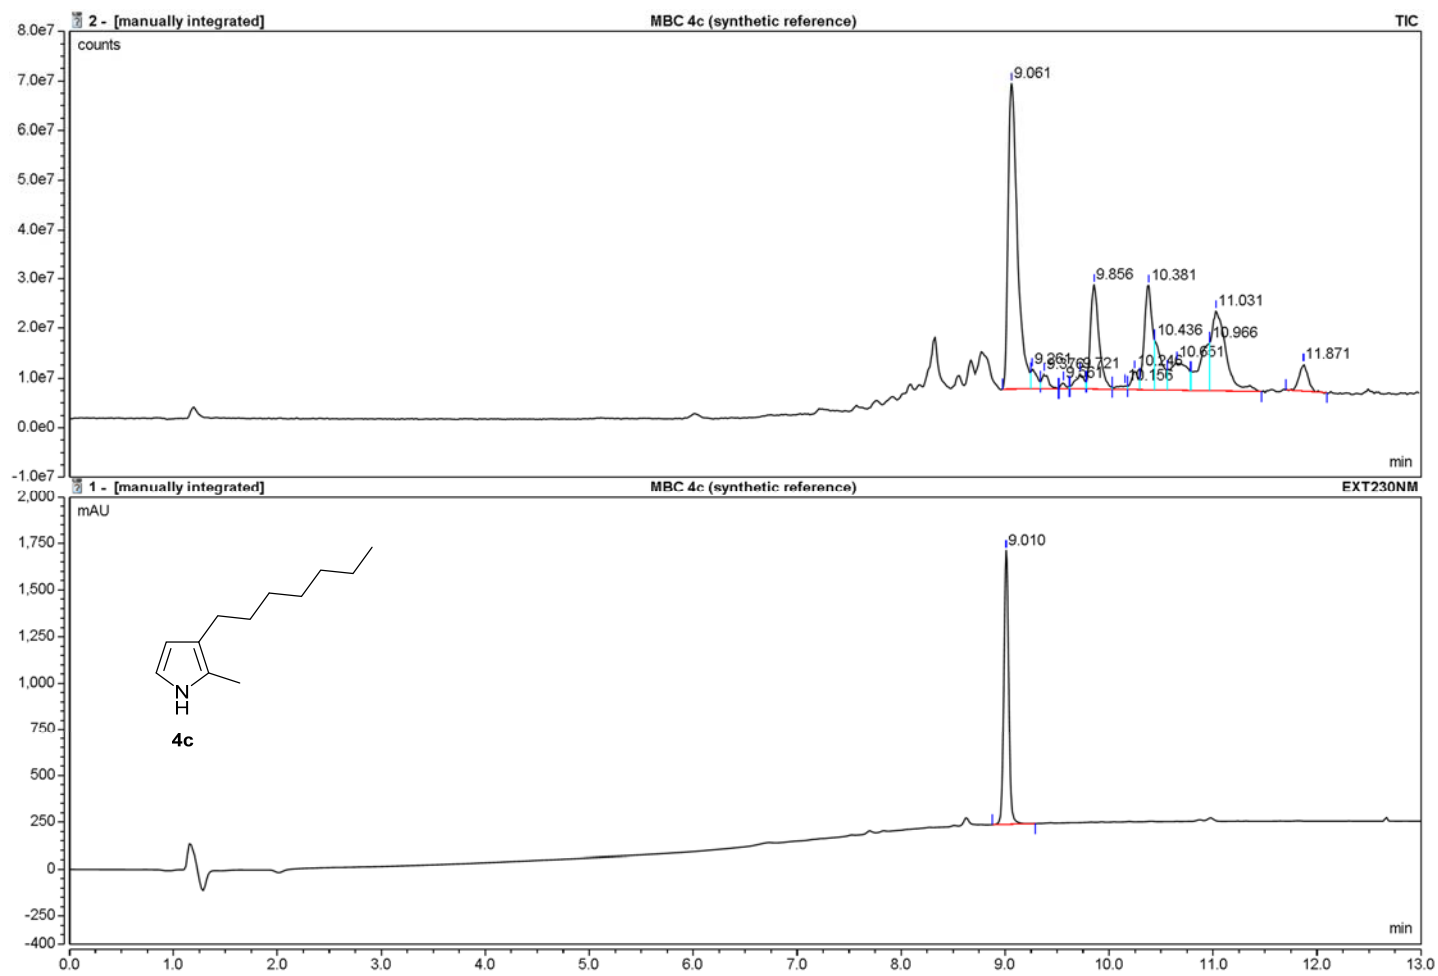

Figure S13: LC-MS data [TIC (top) and UV<sub>230</sub> trace (bottom)] of chemically synthesised monopyrrole **4c**. Retention time  $t_R$  9.01 min.

## Prodiginines

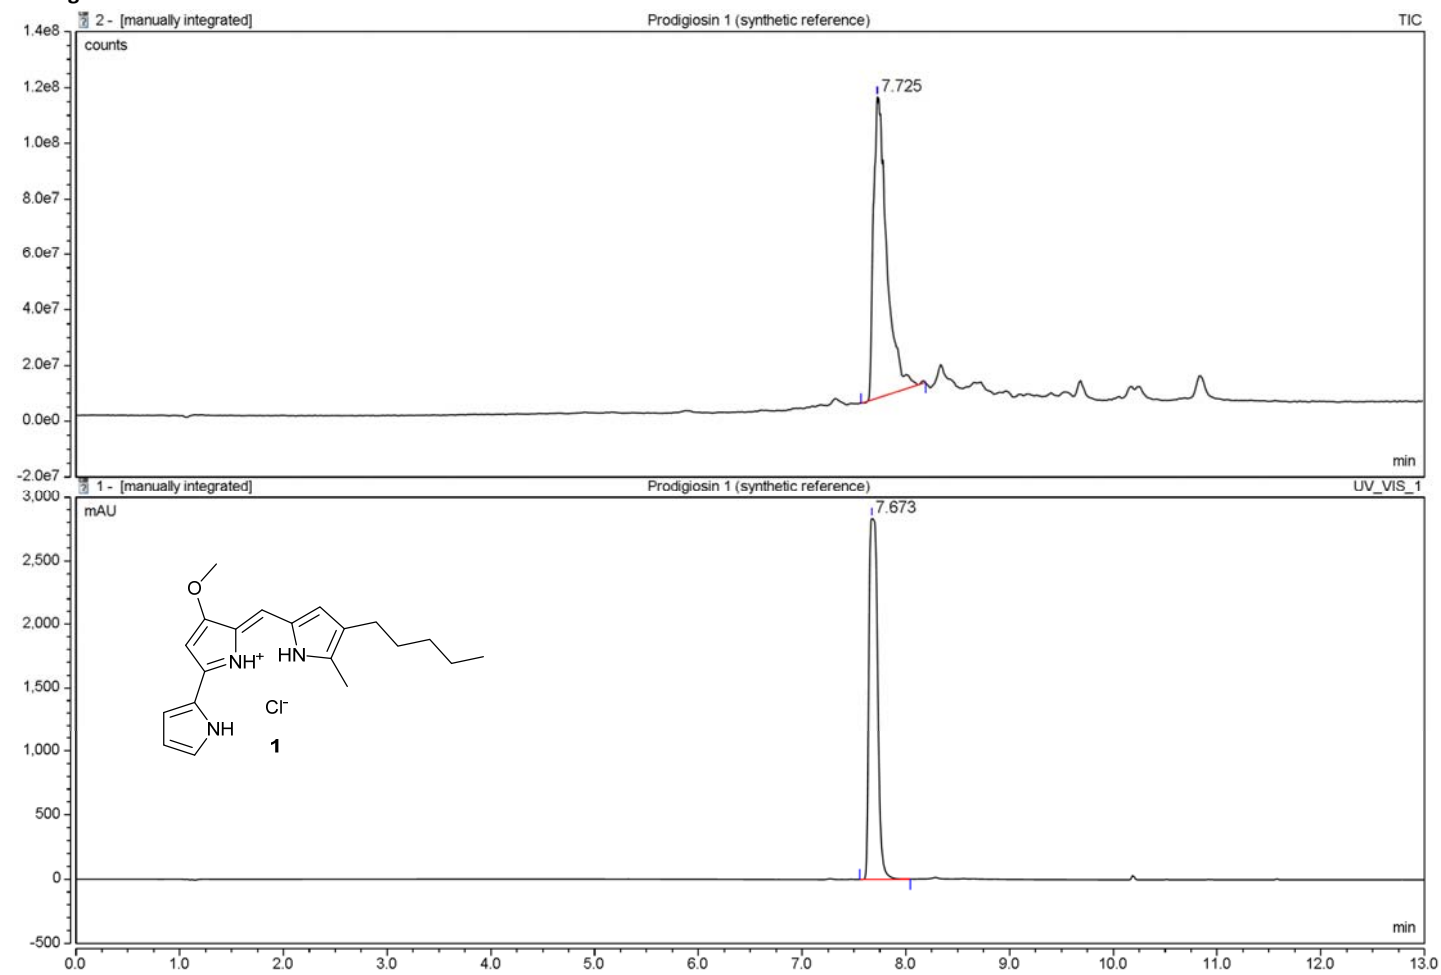

Figure S14: LC-MS data [TIC (top) and UV<sub>535</sub> trace (bottom)] of chemically synthesised prodigiosin (**1**). Retention time  $t_R$  7.67 min.



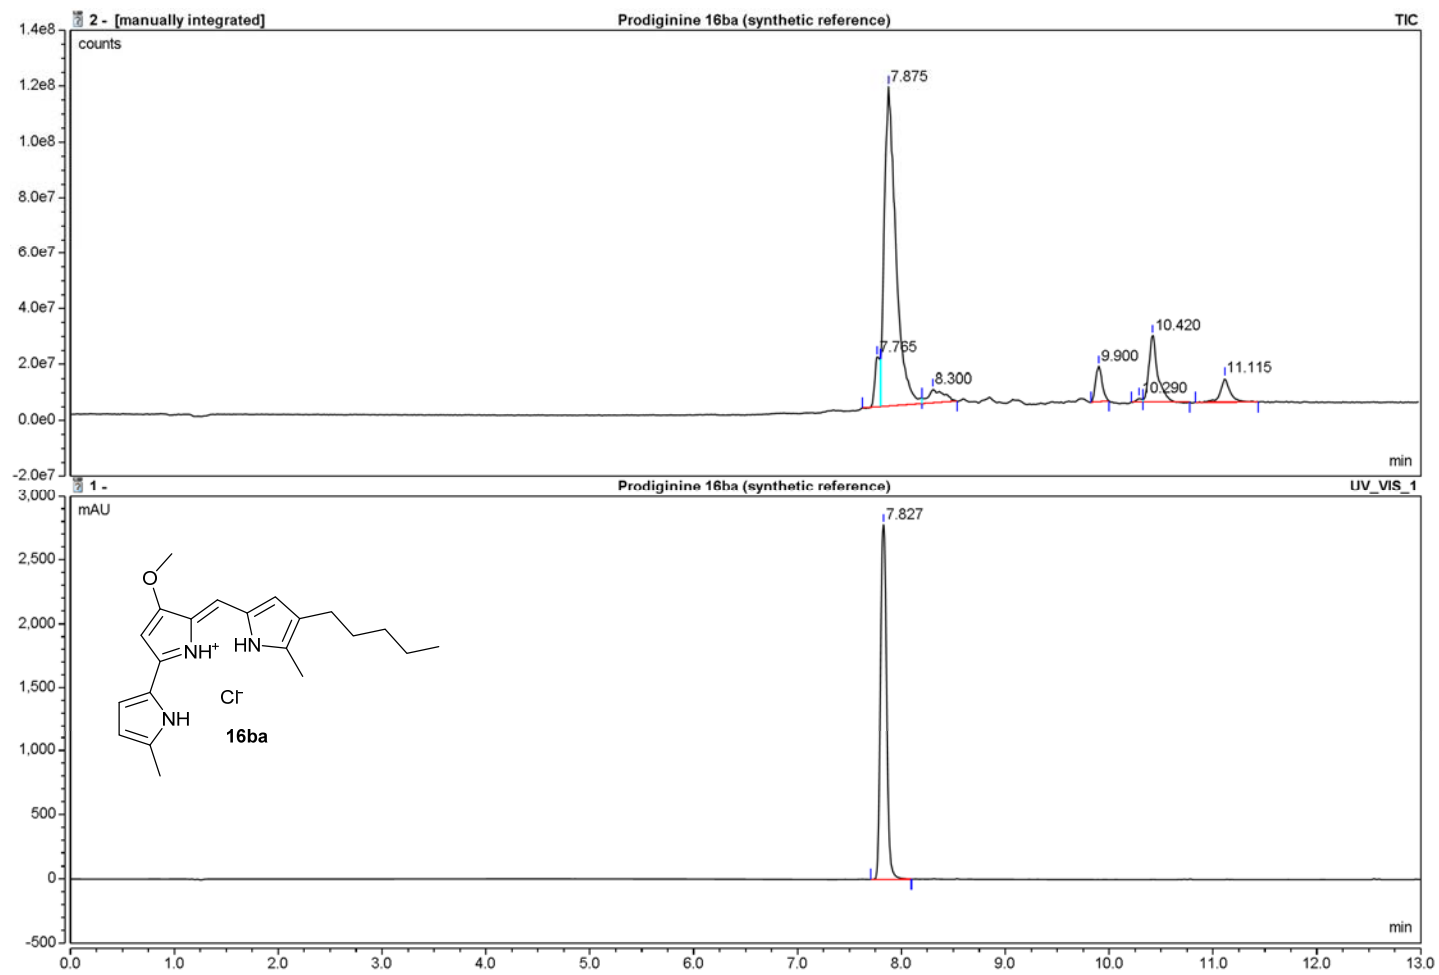

Figure S15: LC-MS data [TIC (top) and UV<sub>535</sub> trace (bottom)] of chemically synthesised prodiginine **16ba**. Retention time  $t_R$  7.83 min.

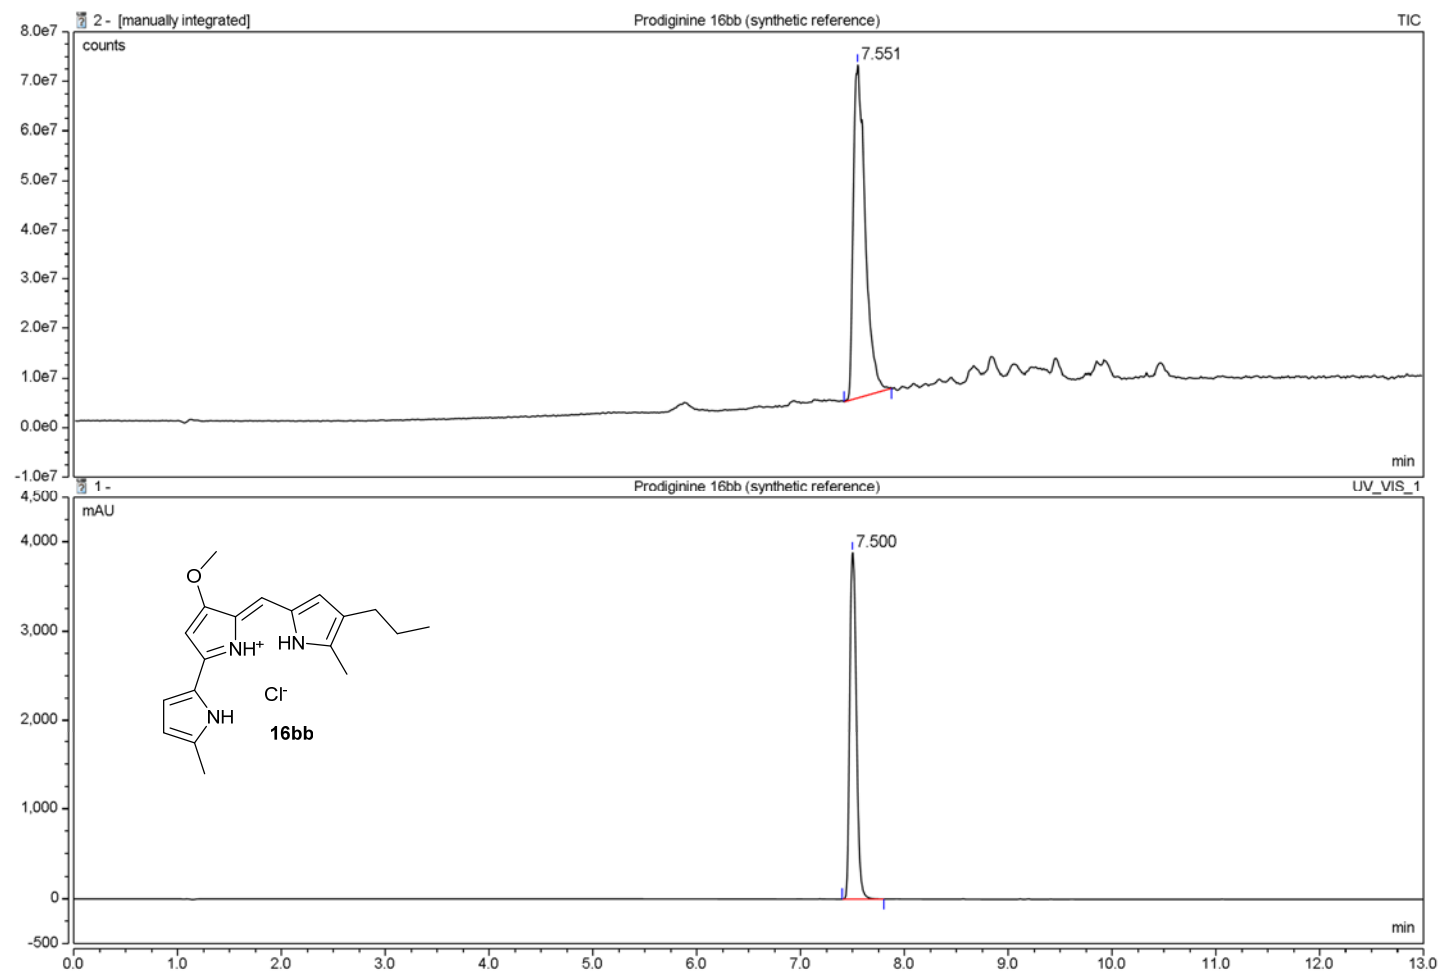

Figure S16: LC-MS data [TIC (top) and UV<sub>535</sub> trace (bottom)] of chemically synthesised prodiginine **16bb**. Retention time  $t_R$  7.50 min.

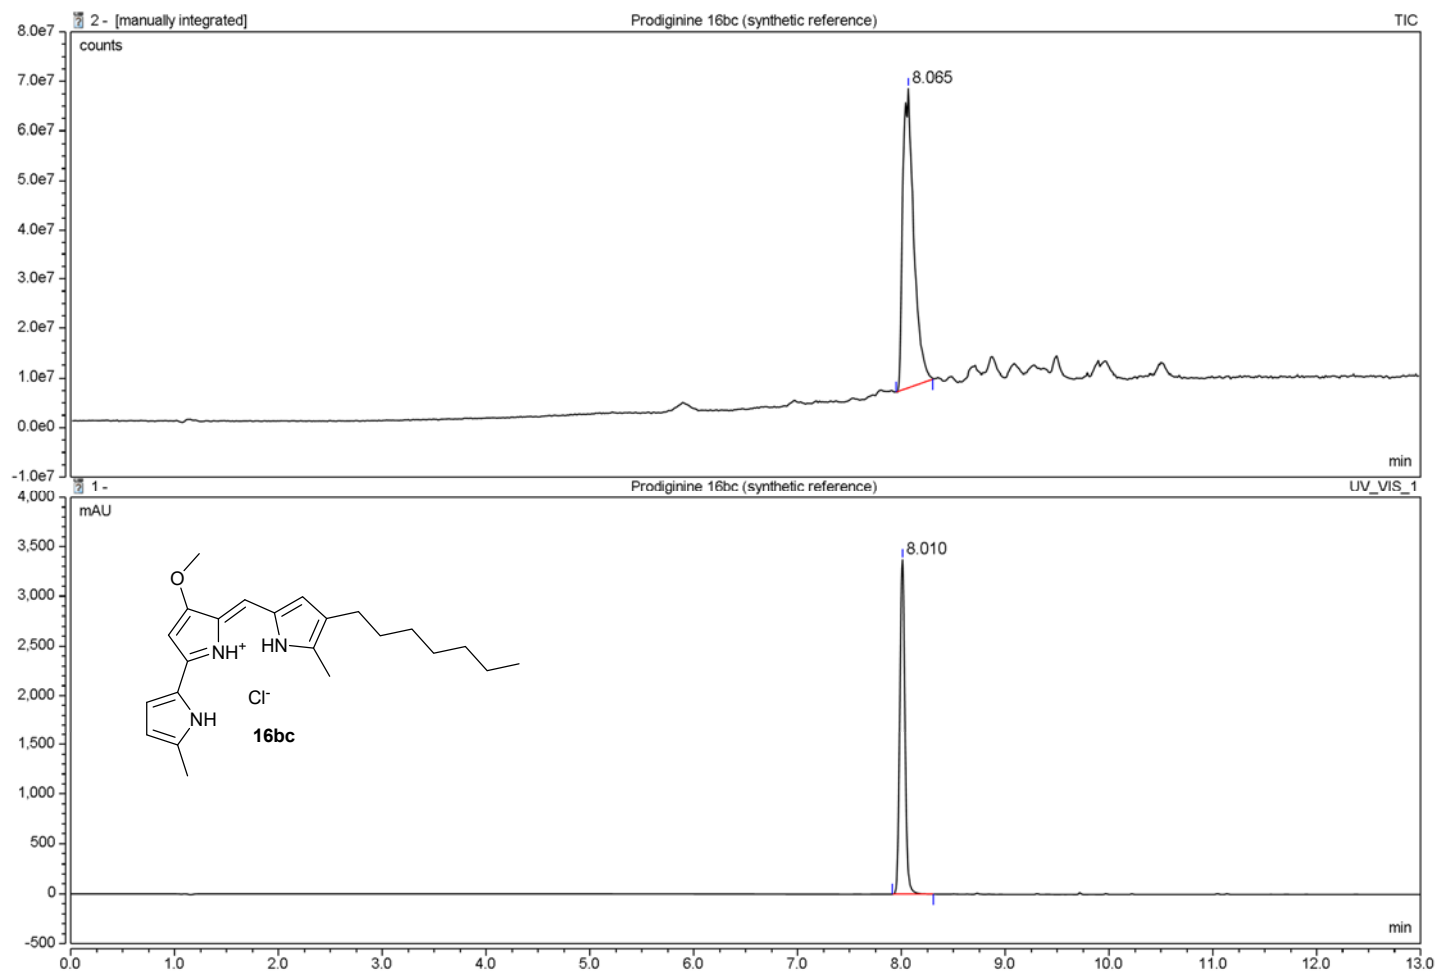

Figure S17: LC-MS data [TIC (top) and UV<sub>535</sub> trace (bottom)] of chemically synthesised prodiginine **16bc**. Retention time  $t_R$  8.01 min.

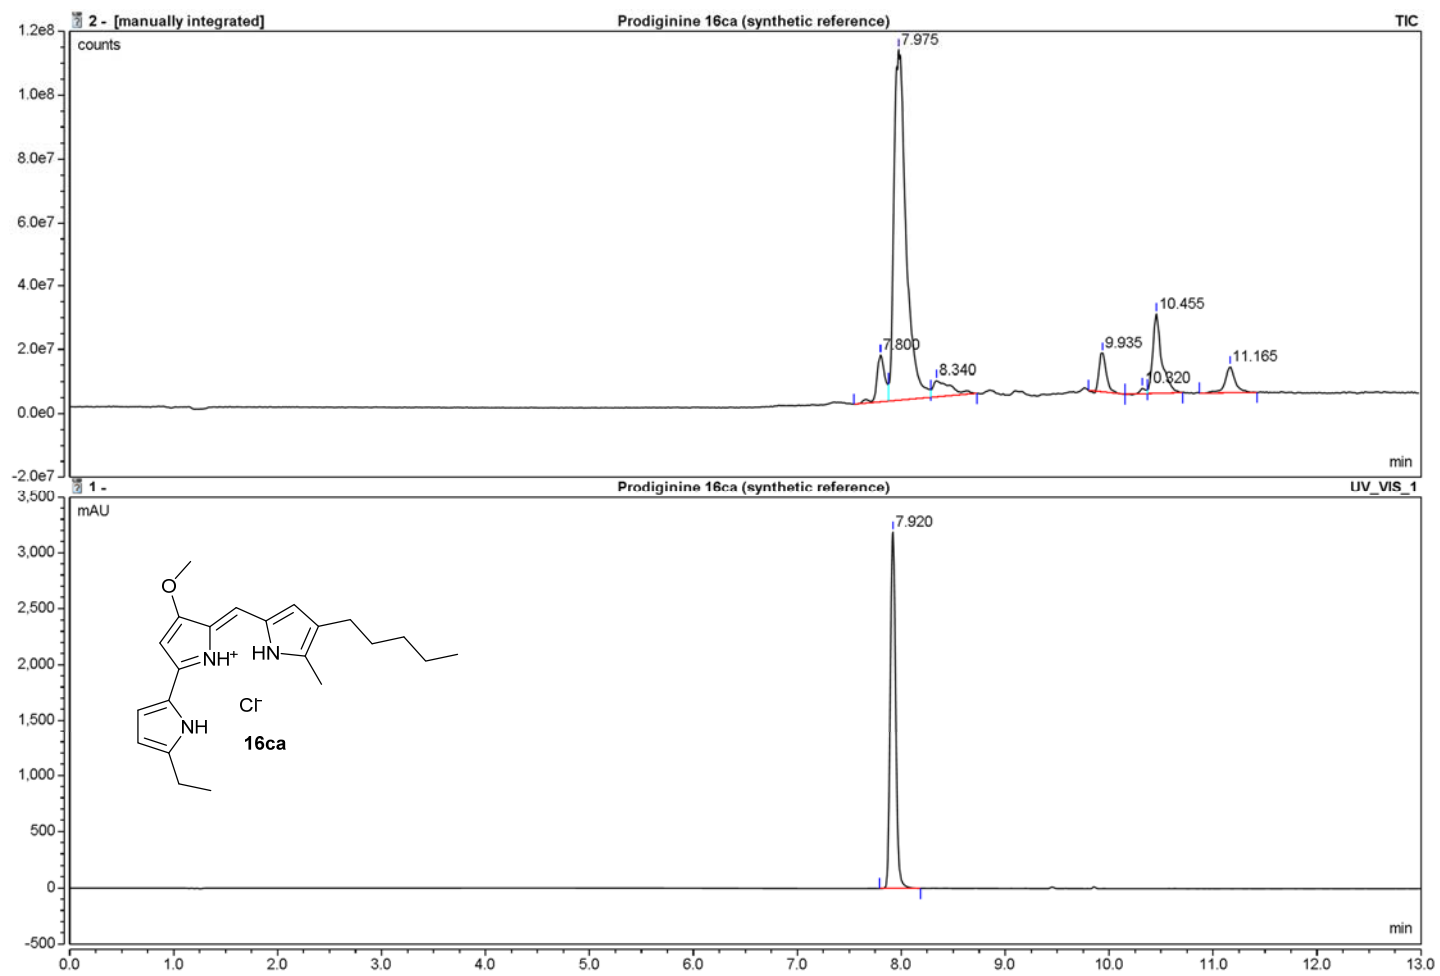

Figure S18: LC-MS data [TIC (top) and UV<sub>535</sub> trace (bottom)] of chemically synthesised prodiginine **16ca**. Retention time  $t_R$  7.92 min.

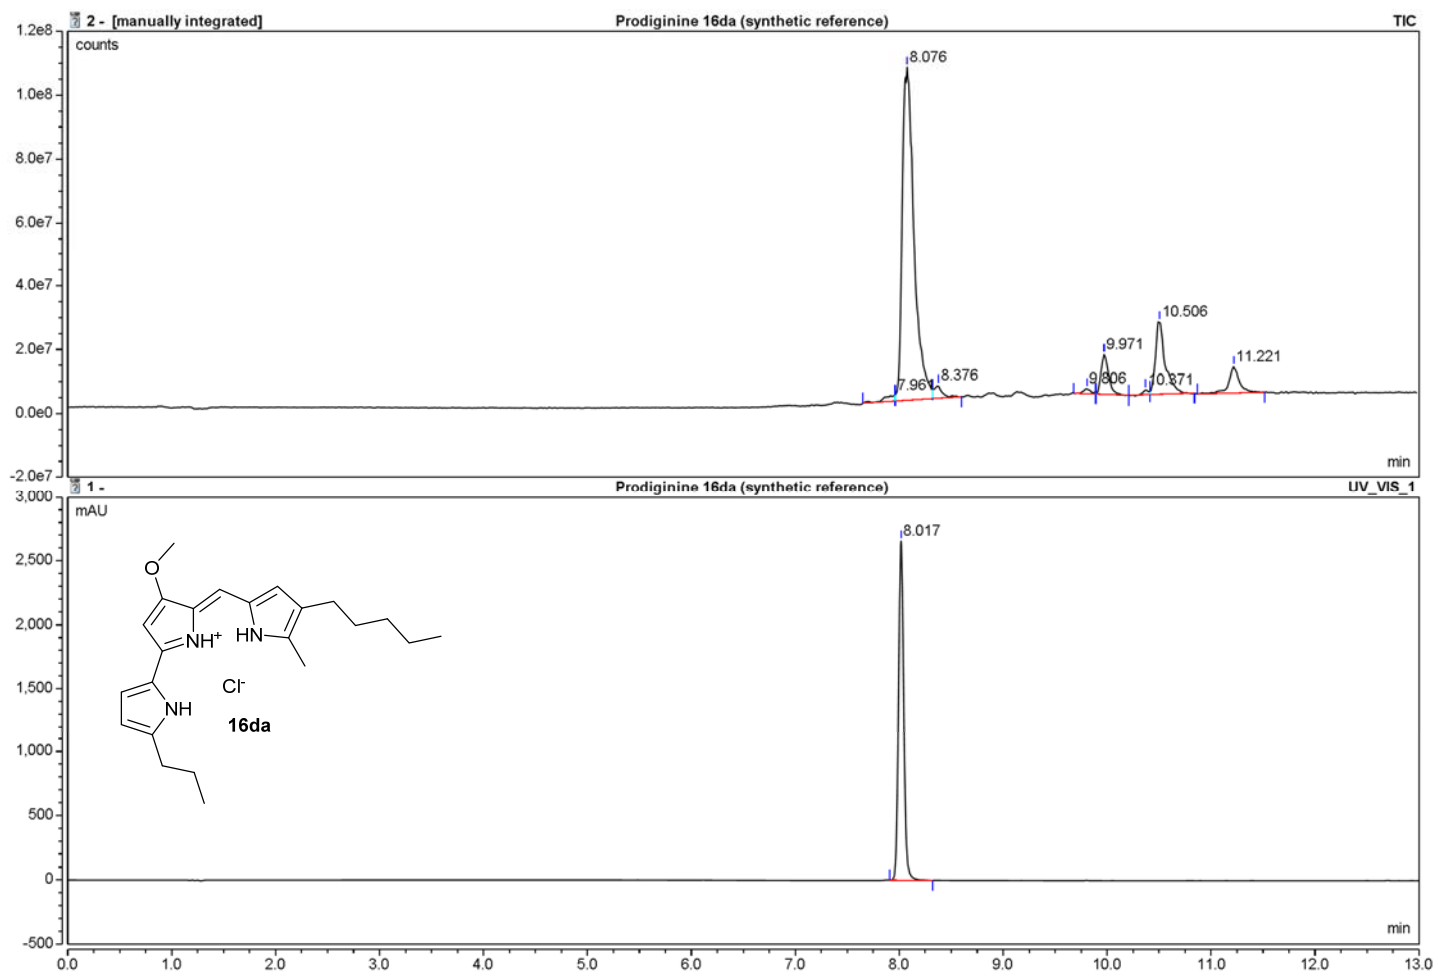

Figure S19: LC-MS data [TIC (top) and UV<sub>535</sub> trace (bottom)] of chemically synthesised prodiginine **16da**. Retention time  $t_R$  8.02 min.

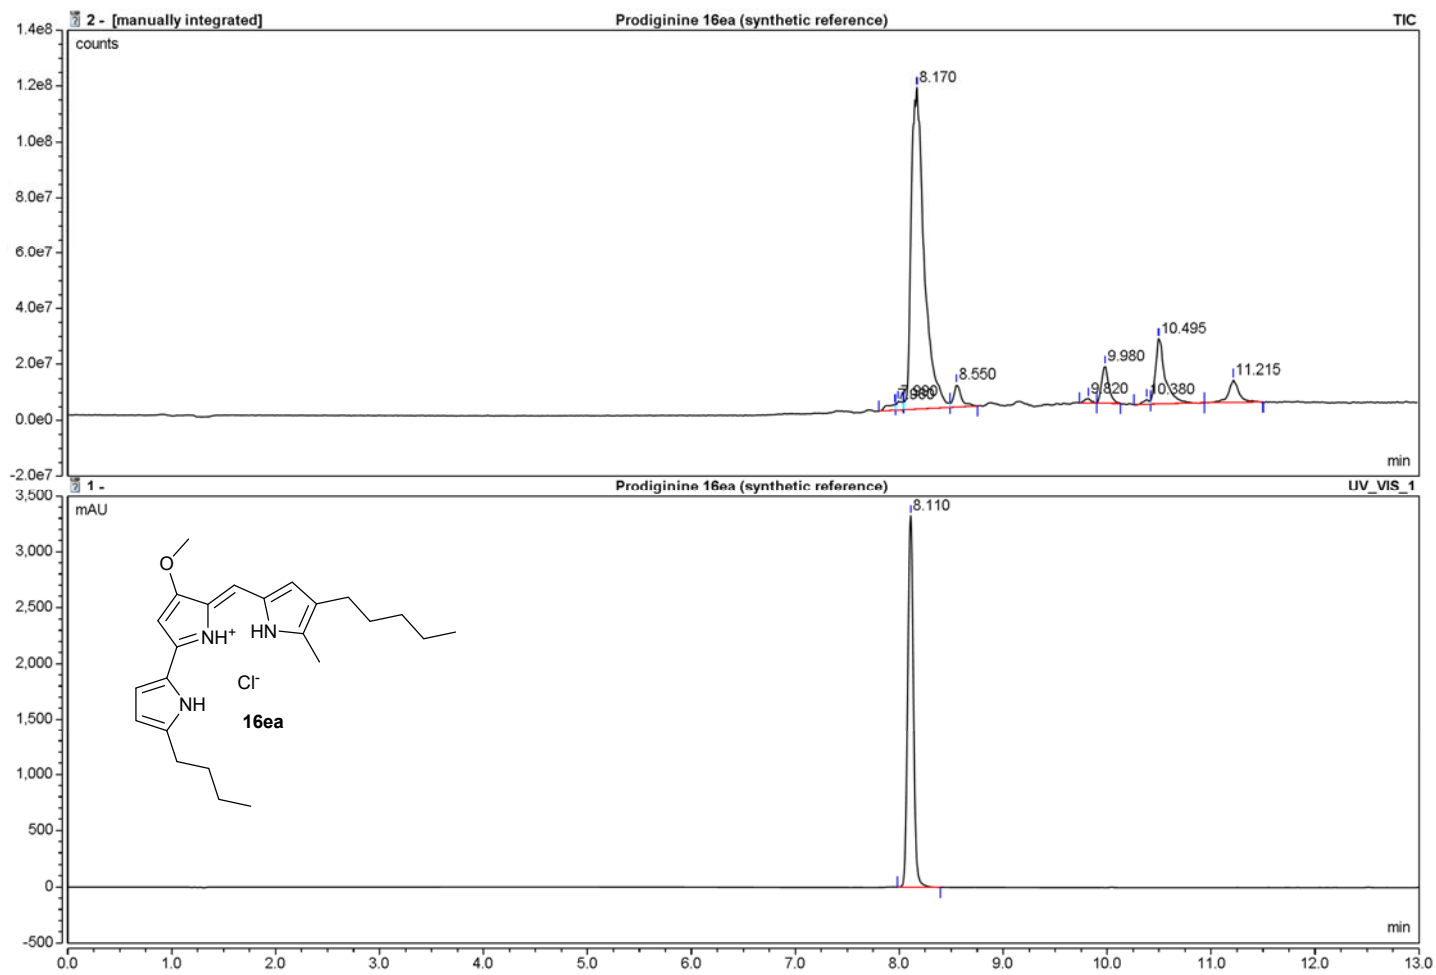

Figure S20: LC-MS data [TIC (top) and UV<sub>535</sub> trace (bottom)] of chemically synthesised prodiginine **16ea**. Retention time  $t_R$  8.11 min.

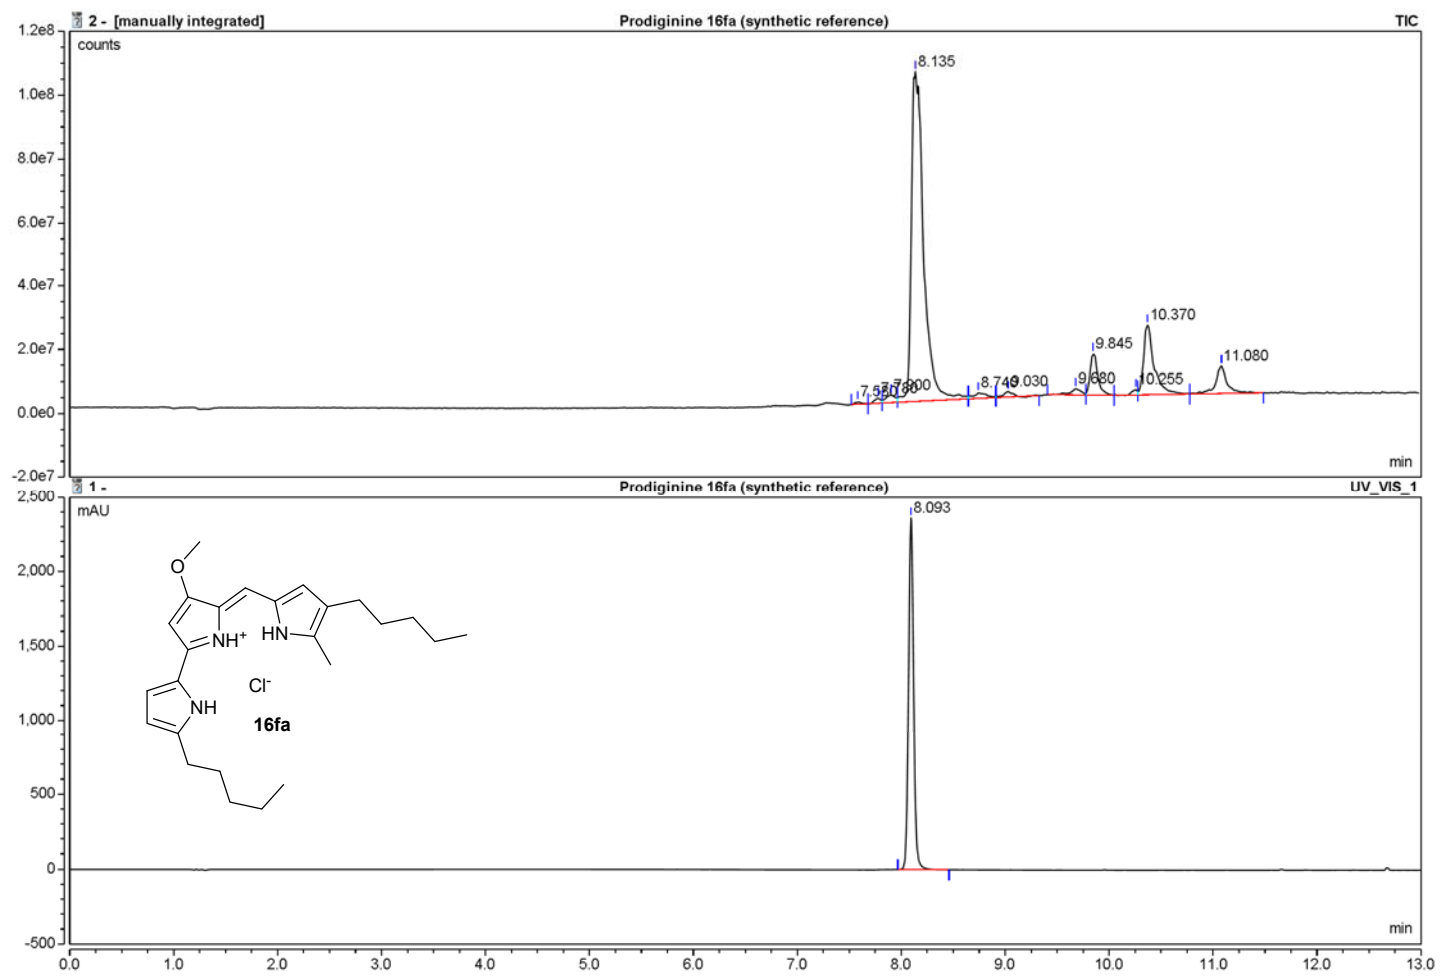

Figure S21: LC-MS data [TIC (top) and UV<sub>535</sub> trace (bottom)] of chemically synthesised prodiginine **16fa**. Retention time  $t_r$  8.09 min.

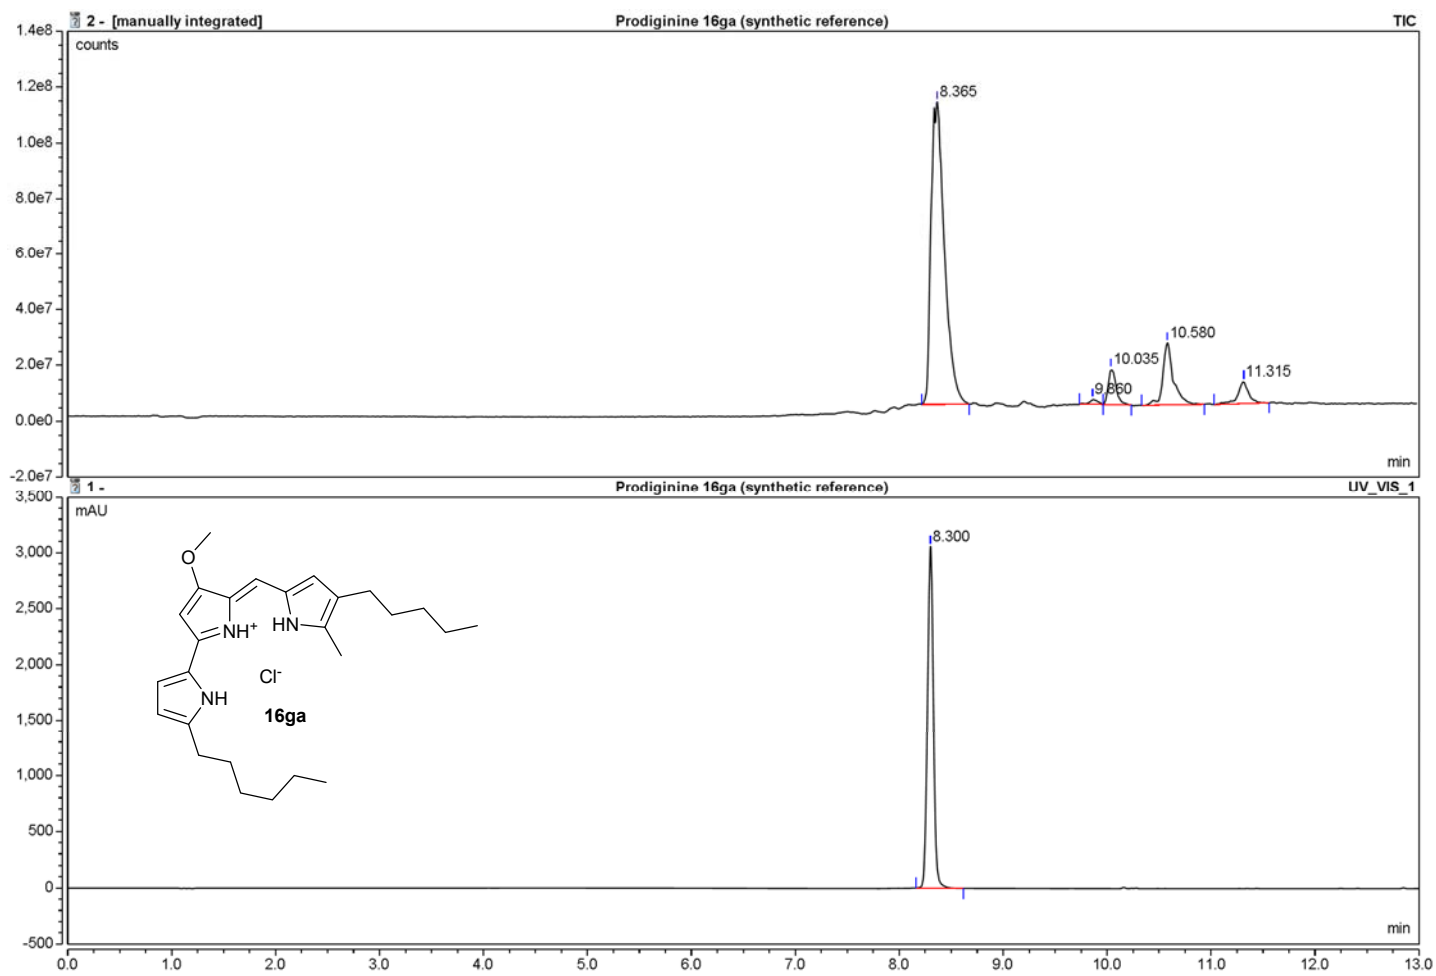

Figure S22: LC-MS data [TIC (top) and UV<sub>535</sub> trace (bottom)] of chemically synthesised prodiginine **16ga**. Retention time  $t_R$  8.30 min.



## 12. LC-MS Chromatograms – Biocatalytic *In Vitro* Experiments

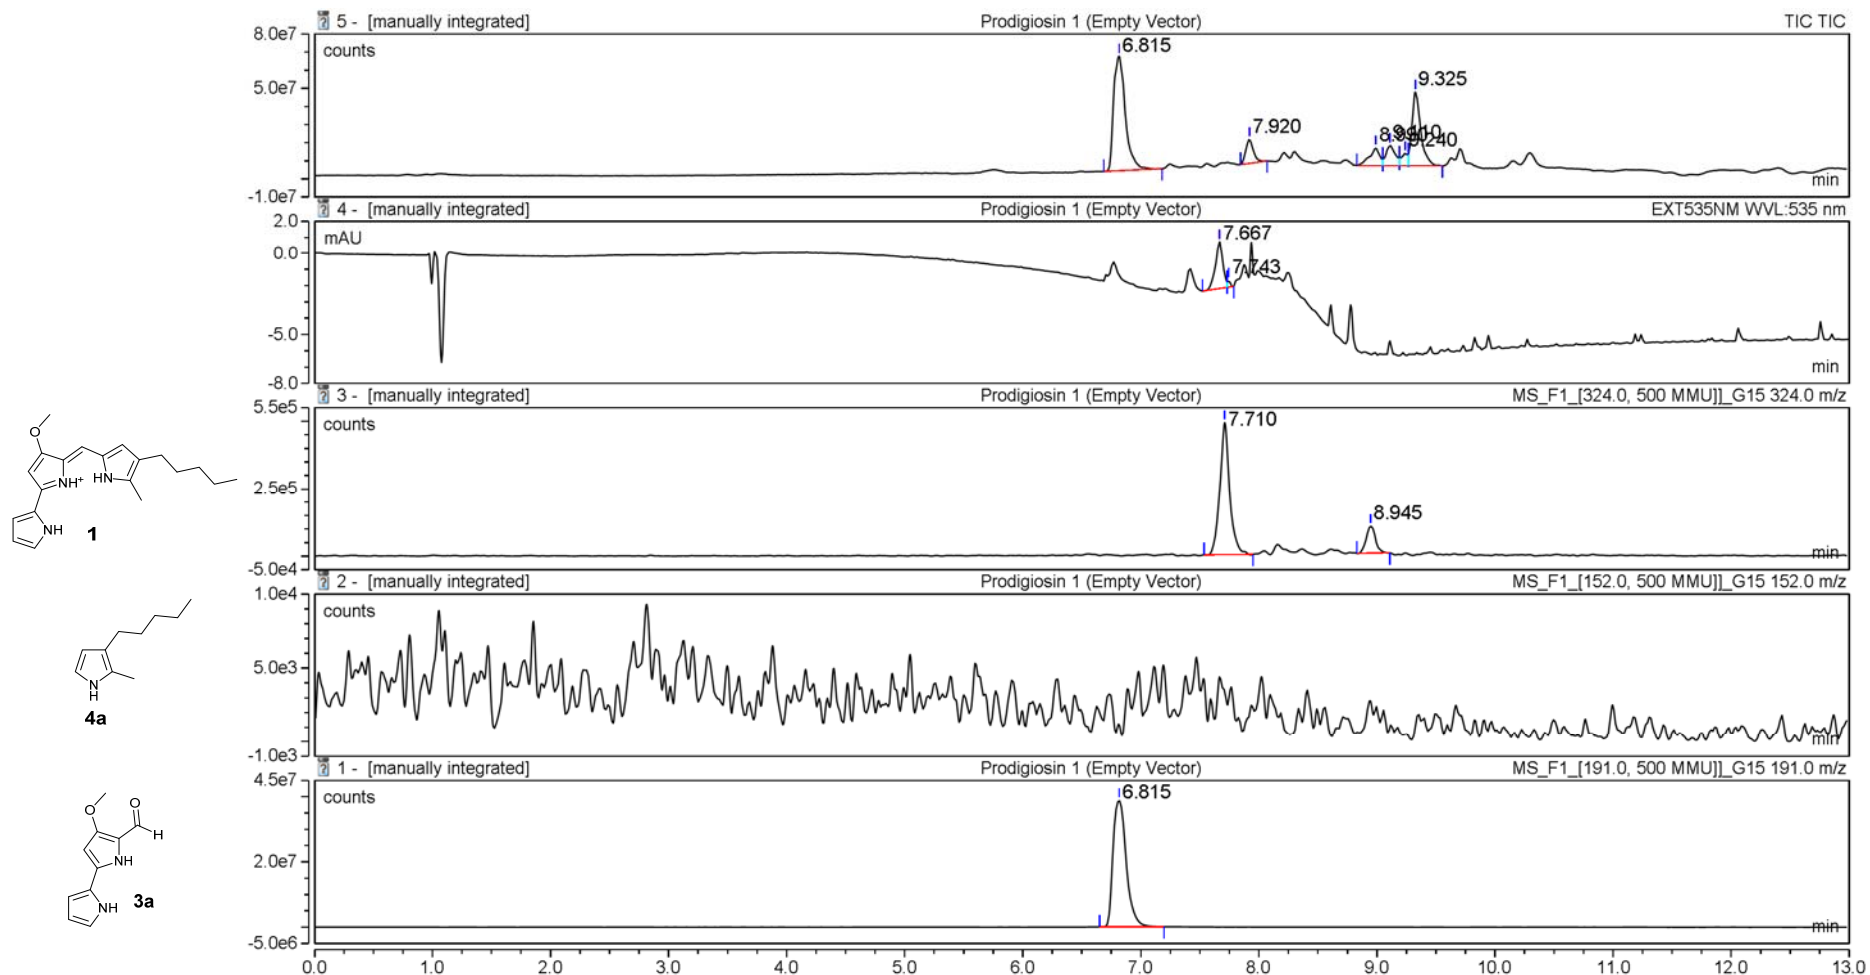

**Figure S23:** LC-MS data [from top to bottom: TIC, UV<sub>535</sub> trace, and extracted ion chromatograms (EIC) of the potential product prodigiosin **1** (m/z 324.0) and the educts pyrrole **4a** (m/z 152.0) and MBC **3a** (m/z 191.0)] from a representative methanolic reaction extract of the biocatalytic empty vector control reaction between pyrrole **4a** and MBC **3a**. The structures of starting materials and the expected condensation product are shown on the left-hand site besides the corresponding EIC. The small amount of prodigiosin **1** found in the EIC (middle chromatogram) can be traced back to acid-catalysed condensation between pyrrole and MBC during chromatography with 0.1% formic acid. Integration of the corresponding signal from the UV<sub>535</sub> trace gives an integral of 0 mAU·min.

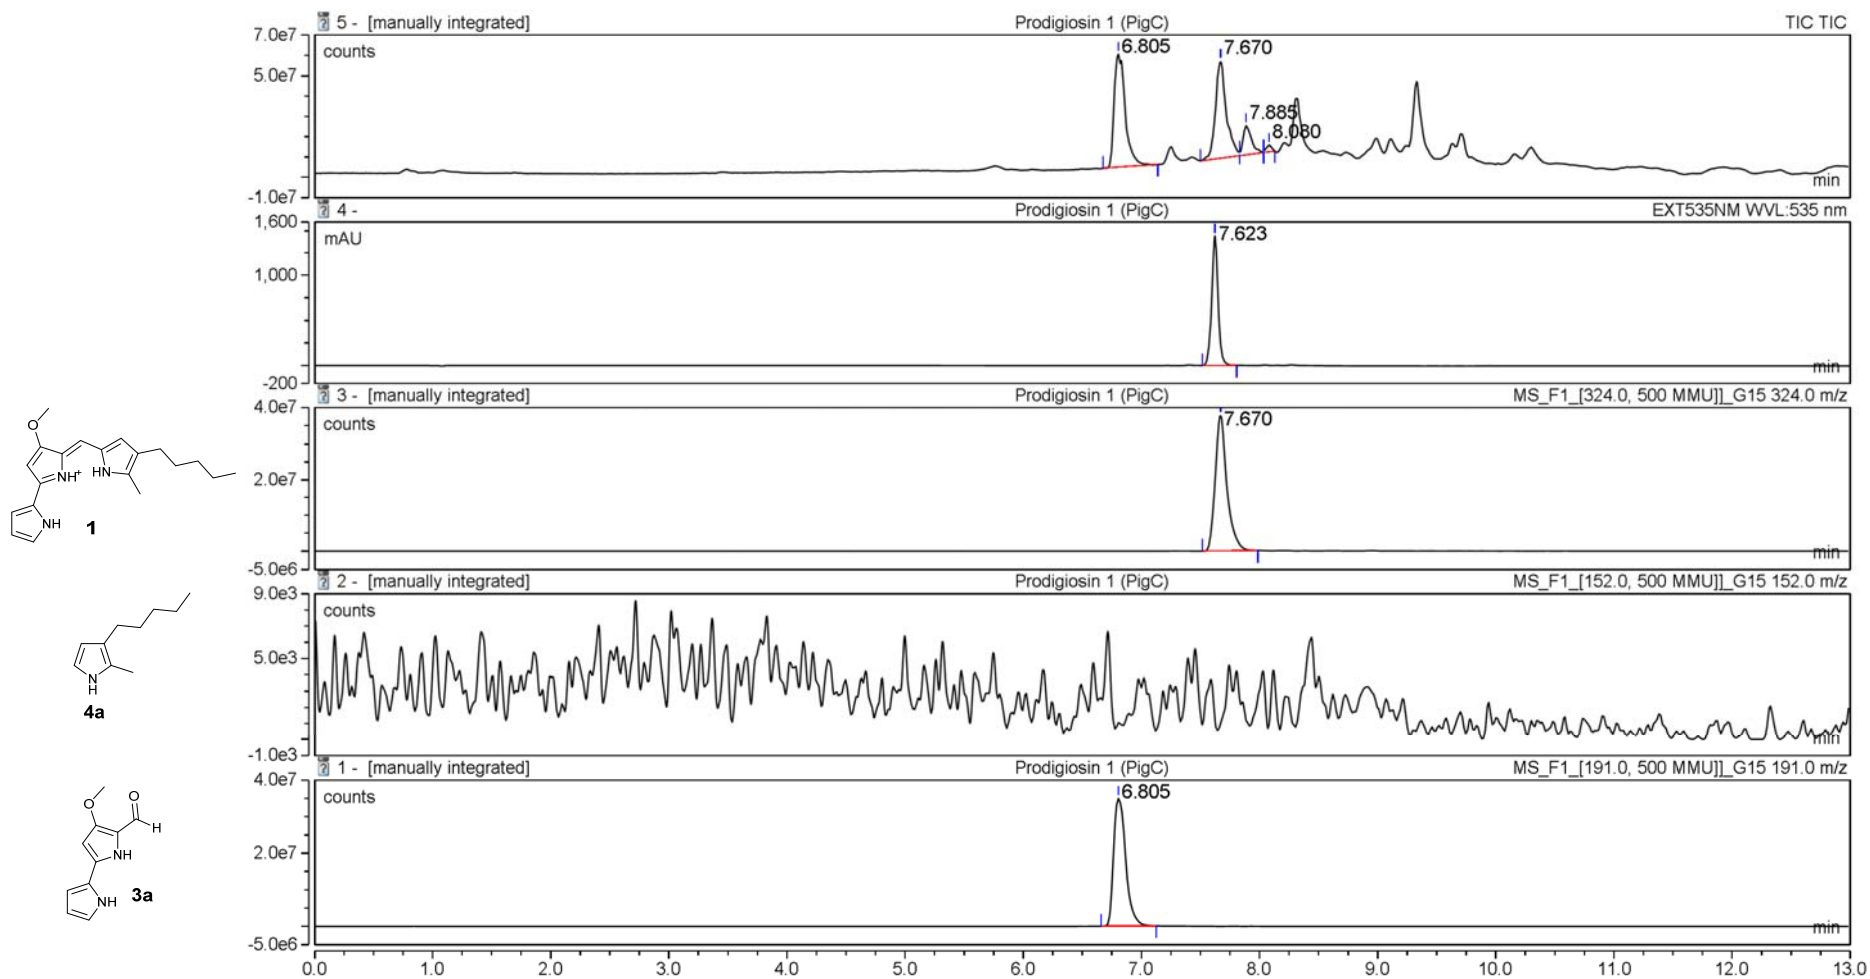

**Figure S24:** LC-MS data [from top to bottom: TIC, UV<sub>535</sub> trace, and EIC of the potential product prodigiosin **1** (m/z 324.0) and the educts pyrrole **4a** (m/z 152.0) and MBC **3a** (m/z 191.0)] from a representative methanolic reaction extract of the PigC-catalysed condensation reaction between pyrrole **4a** and MBC **3a**. The structures of starting materials and the expected condensation product are shown on the left-hand side besides the corresponding EIC. Retention time of prodigiosin **1**  $t_R$  7.62 min.

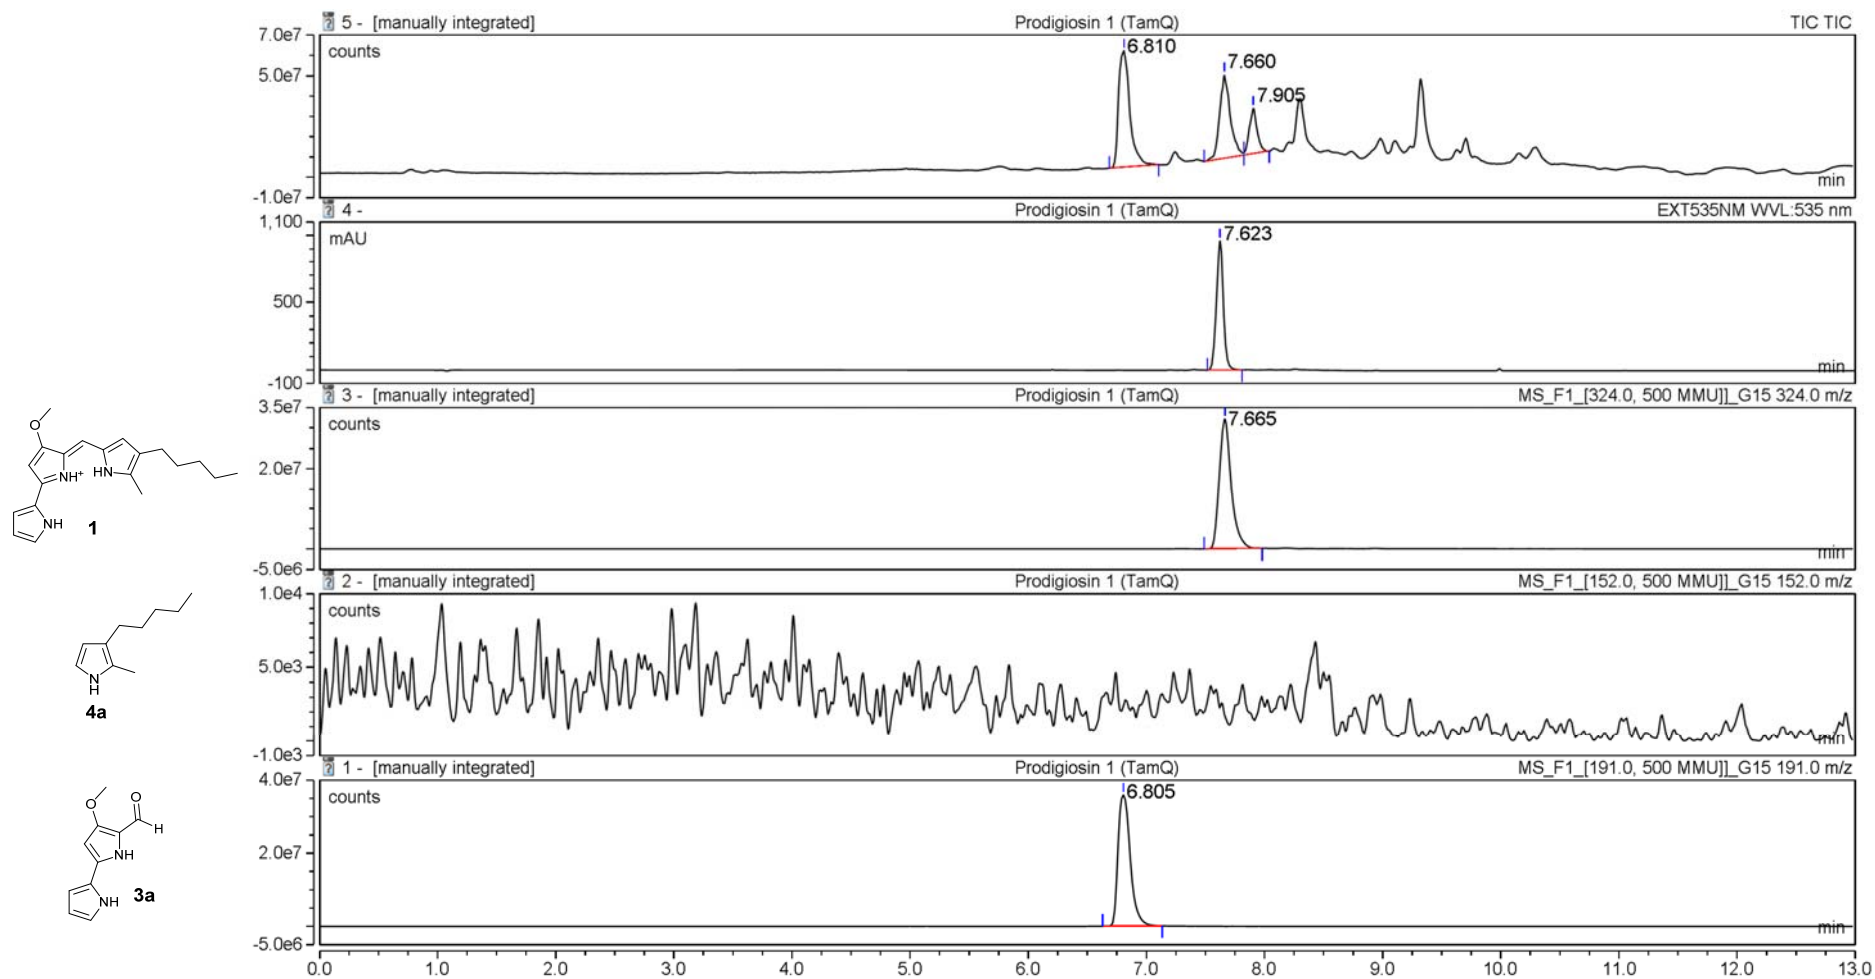

**Figure S25:** LC-MS data [from top to bottom: TIC, UV<sub>535</sub> trace, and EIC of the potential product prodigiosin **1** (m/z 324.0) and the educts pyrrole **4a** (m/z 152.0) and MBC **3a** (m/z 191.0)] from a representative methanolic reaction extract of the TamQ-catalysed condensation reaction between pyrrole **4a** and MBC **3a**. The structures of starting materials and the expected condensation product are shown on the left-hand site besides the corresponding EIC. Retention time of prodigiosin **1**  $t_R$  7.62 min. Retention time of prodigiosin **1**  $t_R$  7.62 min.

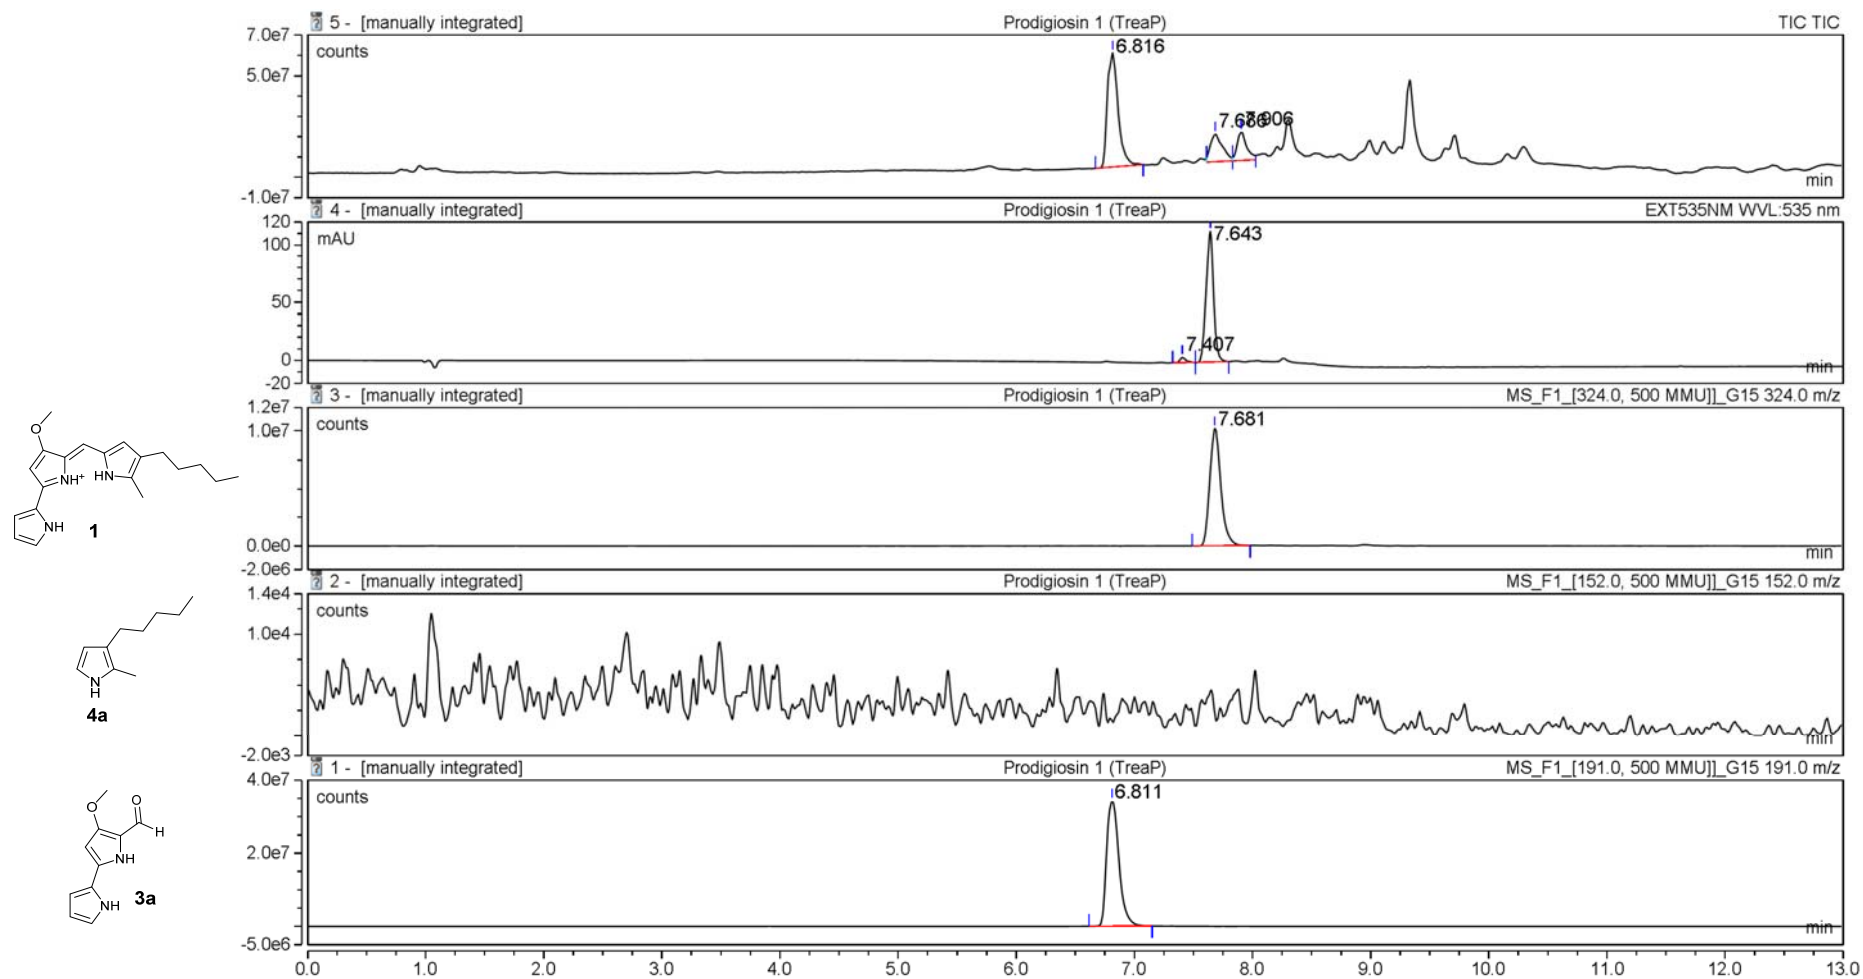

**Figure S26:** LC-MS data [from top to bottom: TIC, UV<sub>535</sub> trace, and EIC of the potential product prodigiosin **1** (m/z 324.0) and the educts pyrrole **4a** (m/z 152.0) and MBC **3a** (m/z 191.0)] from a representative methanolic reaction extract of the TreaP-catalysed condensation reaction between pyrrole **4a** and MBC **3a**. The structures of starting materials and the expected condensation product are shown on the left-hand site besides the corresponding EIC. Retention time of prodigiosin **1**  $t_R$  7.62 min. Retention time of prodigiosin **1**  $t_R$  7.64 min.

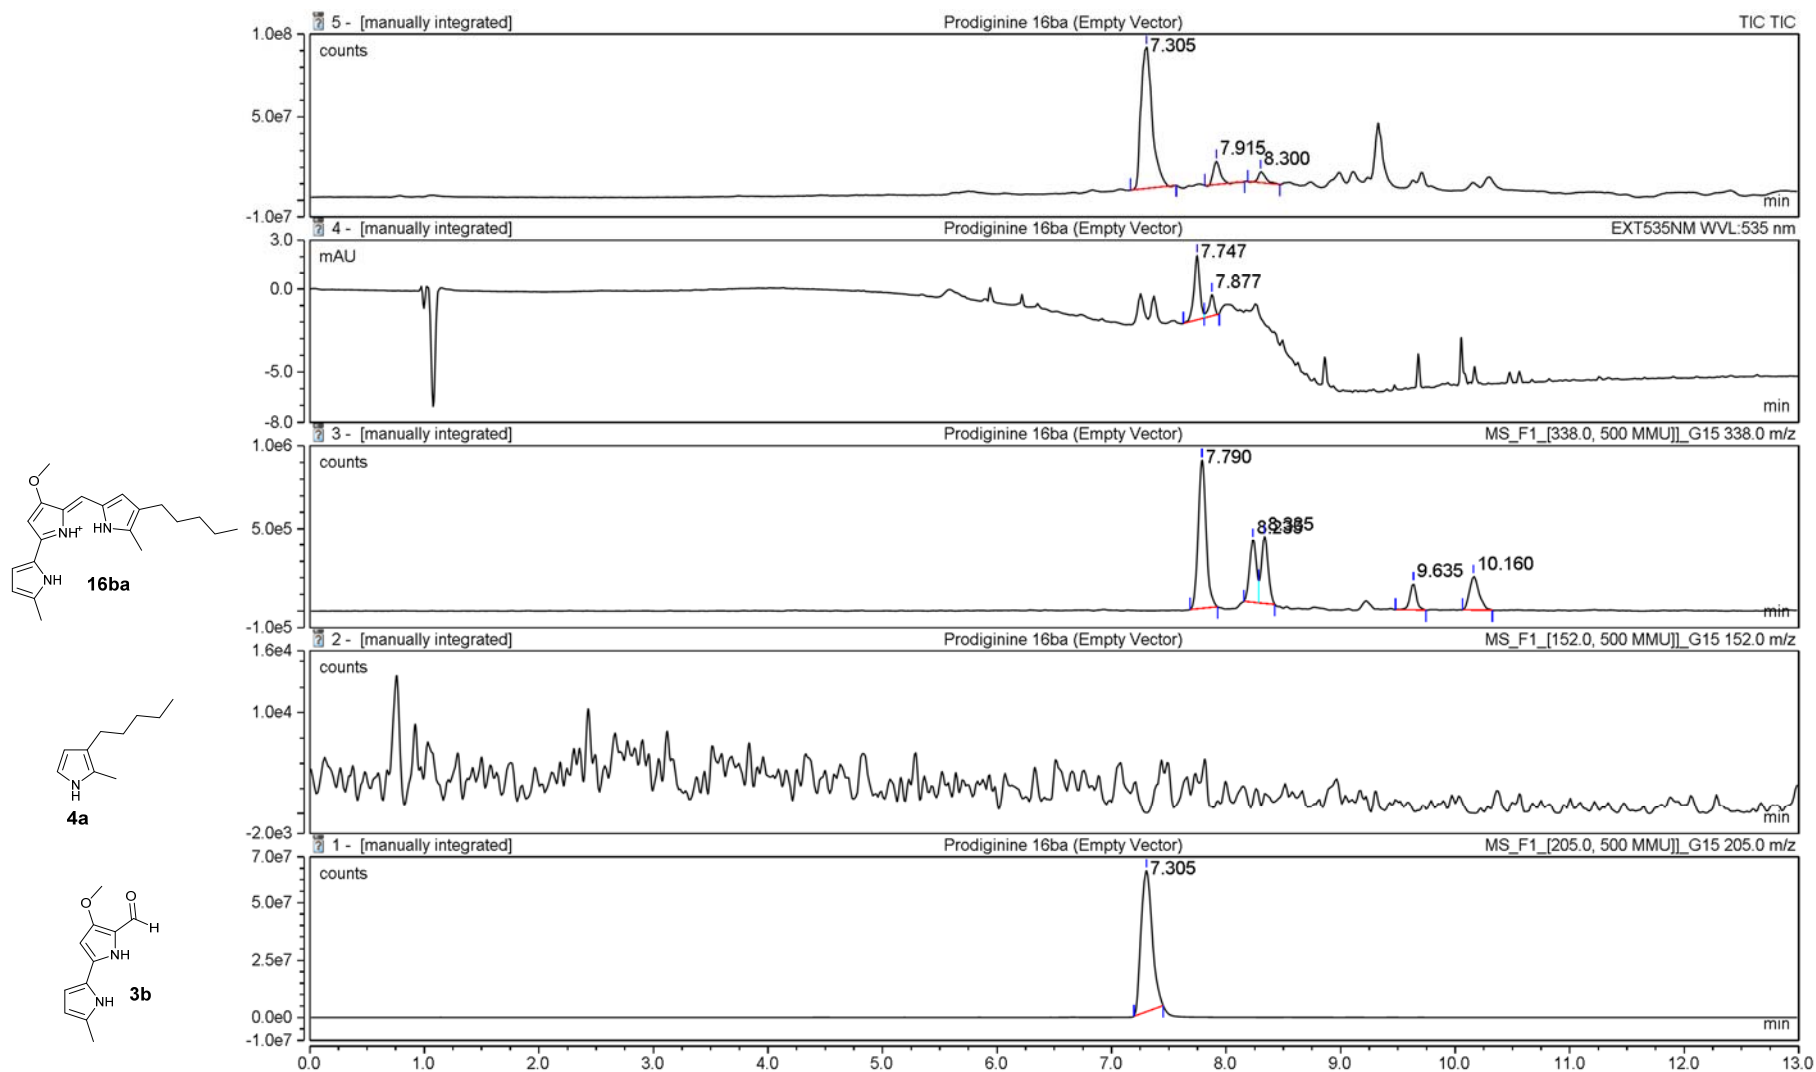

**Figure S27:** LC-MS data [from top to bottom: TIC, UV<sub>535</sub> trace, and EIC of the potential product prodiginine **16ba** (m/z 338.0) and the educts pyrrole **4a** (m/z 152.0) and MBC **3b** (m/z 205.0)] from a representative methanolic reaction extract of the biocatalytic empty vector control reaction between pyrrole **4a** and MBC **3b**. The structures of starting materials and the expected condensation product are shown on the left-hand site besides the corresponding EIC. The small amount of prodiginosin **1** found in the EIC (middle chromatogram) can be traced back to acid-catalysed condensation between pyrrole and MBC during chromatography with 0.1% formic acid. Integration of the corresponding signal from the UV<sub>535</sub> trace gives an integral of 0 mAU·min.

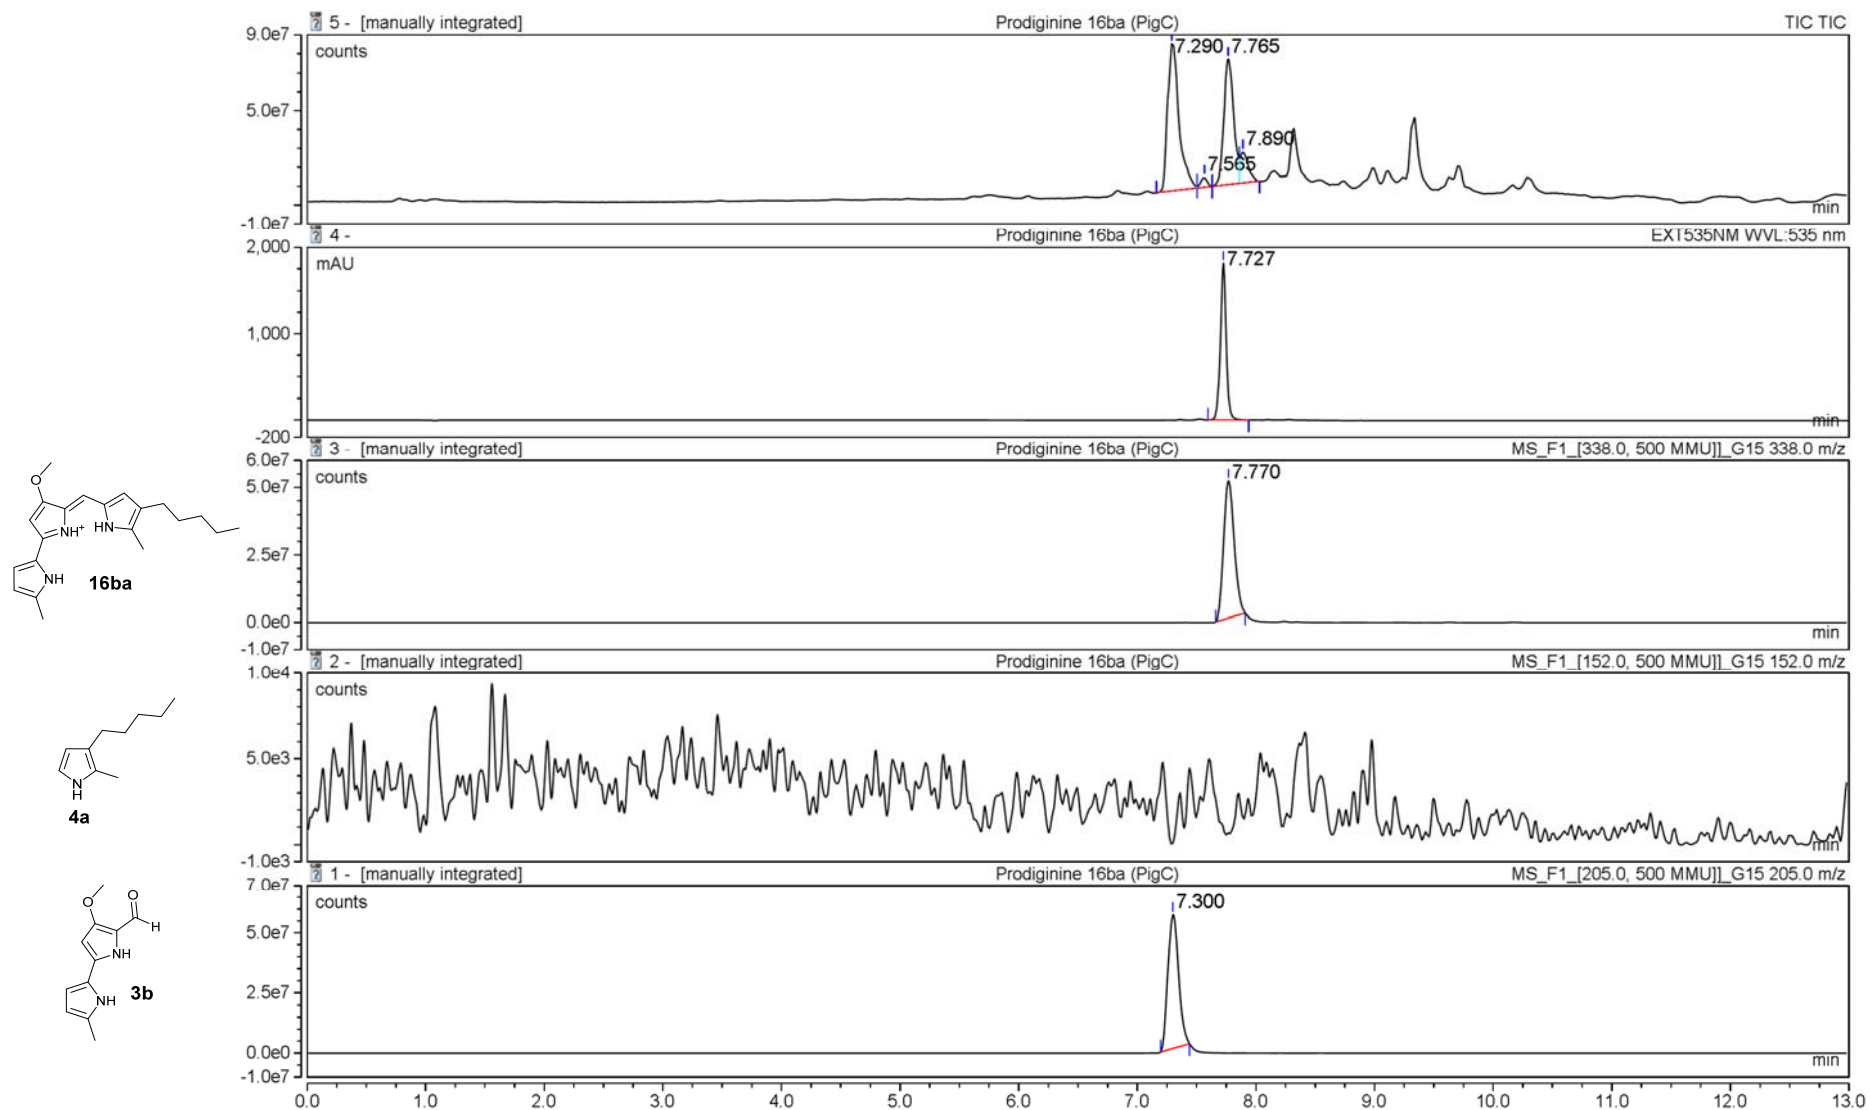

**Figure S28:** LC-MS data [from top to bottom: TIC, UV<sub>535</sub> trace, and EIC of the potential product prodiginine **16ba** ( $m/z$  338.0) and the educts pyrrole **4a** ( $m/z$  152.0) and MBC **3b** ( $m/z$  205.0)] from a representative methanolic reaction extract of the PigC-catalysed condensation reaction between pyrrole **4a** and MBC **3b**. The structures of starting materials and the expected condensation product are shown on the left-hand site besides the corresponding EIC. Retention time of prodiginine **16ba**  $t_R$  7.73 min.

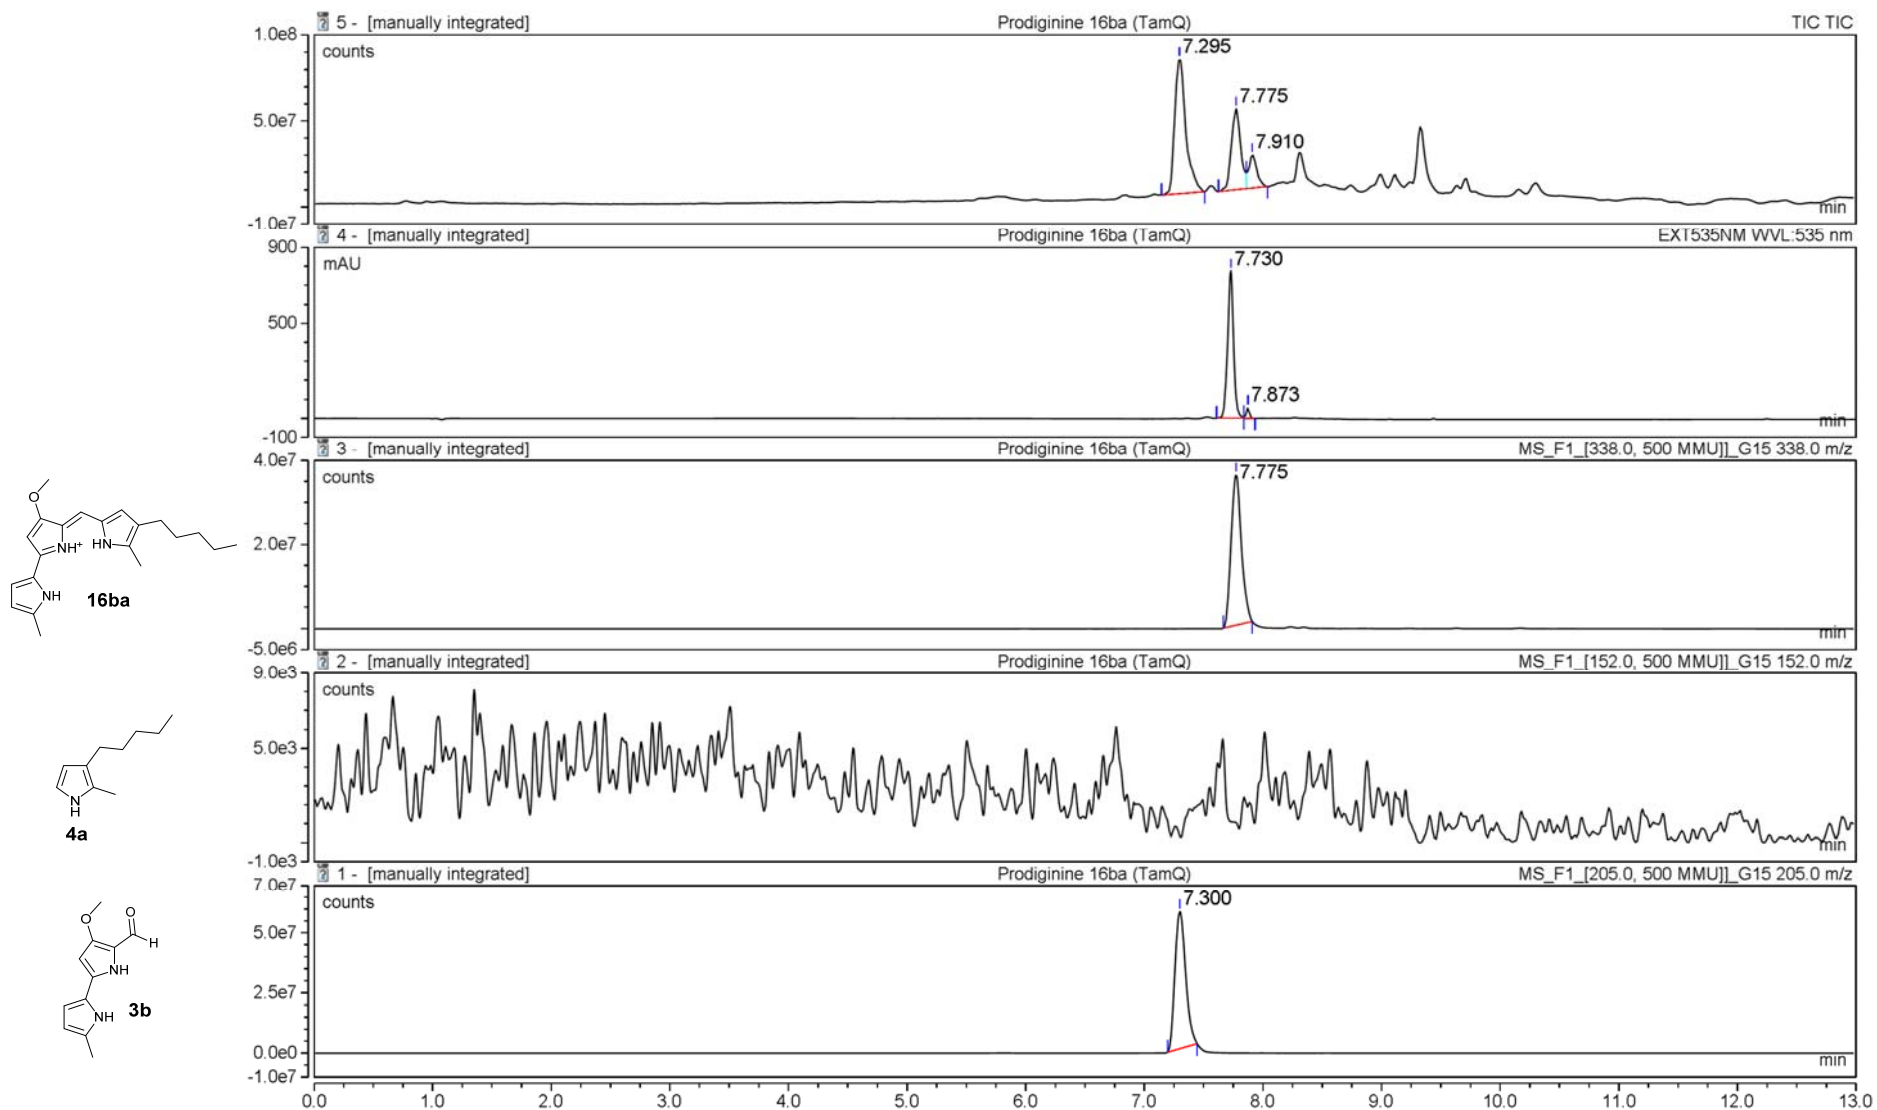

**Figure S29:** LC-MS data [from top to bottom: TIC, UV<sub>535</sub> trace, and EIC of the potential product prodiginine **16ba** (m/z 338.0) and the educts pyrrole **4a** (m/z 152.0) and MBC **3b** (m/z 205.0)] from a representative methanolic reaction extract of the TamQ-catalysed condensation reaction between pyrrole **4a** and MBC **3b**. The structures of starting materials and the expected condensation product are shown on the left-hand site besides the corresponding EIC. Retention time of prodiginine **16ba**  $t_R$  7.73 min.

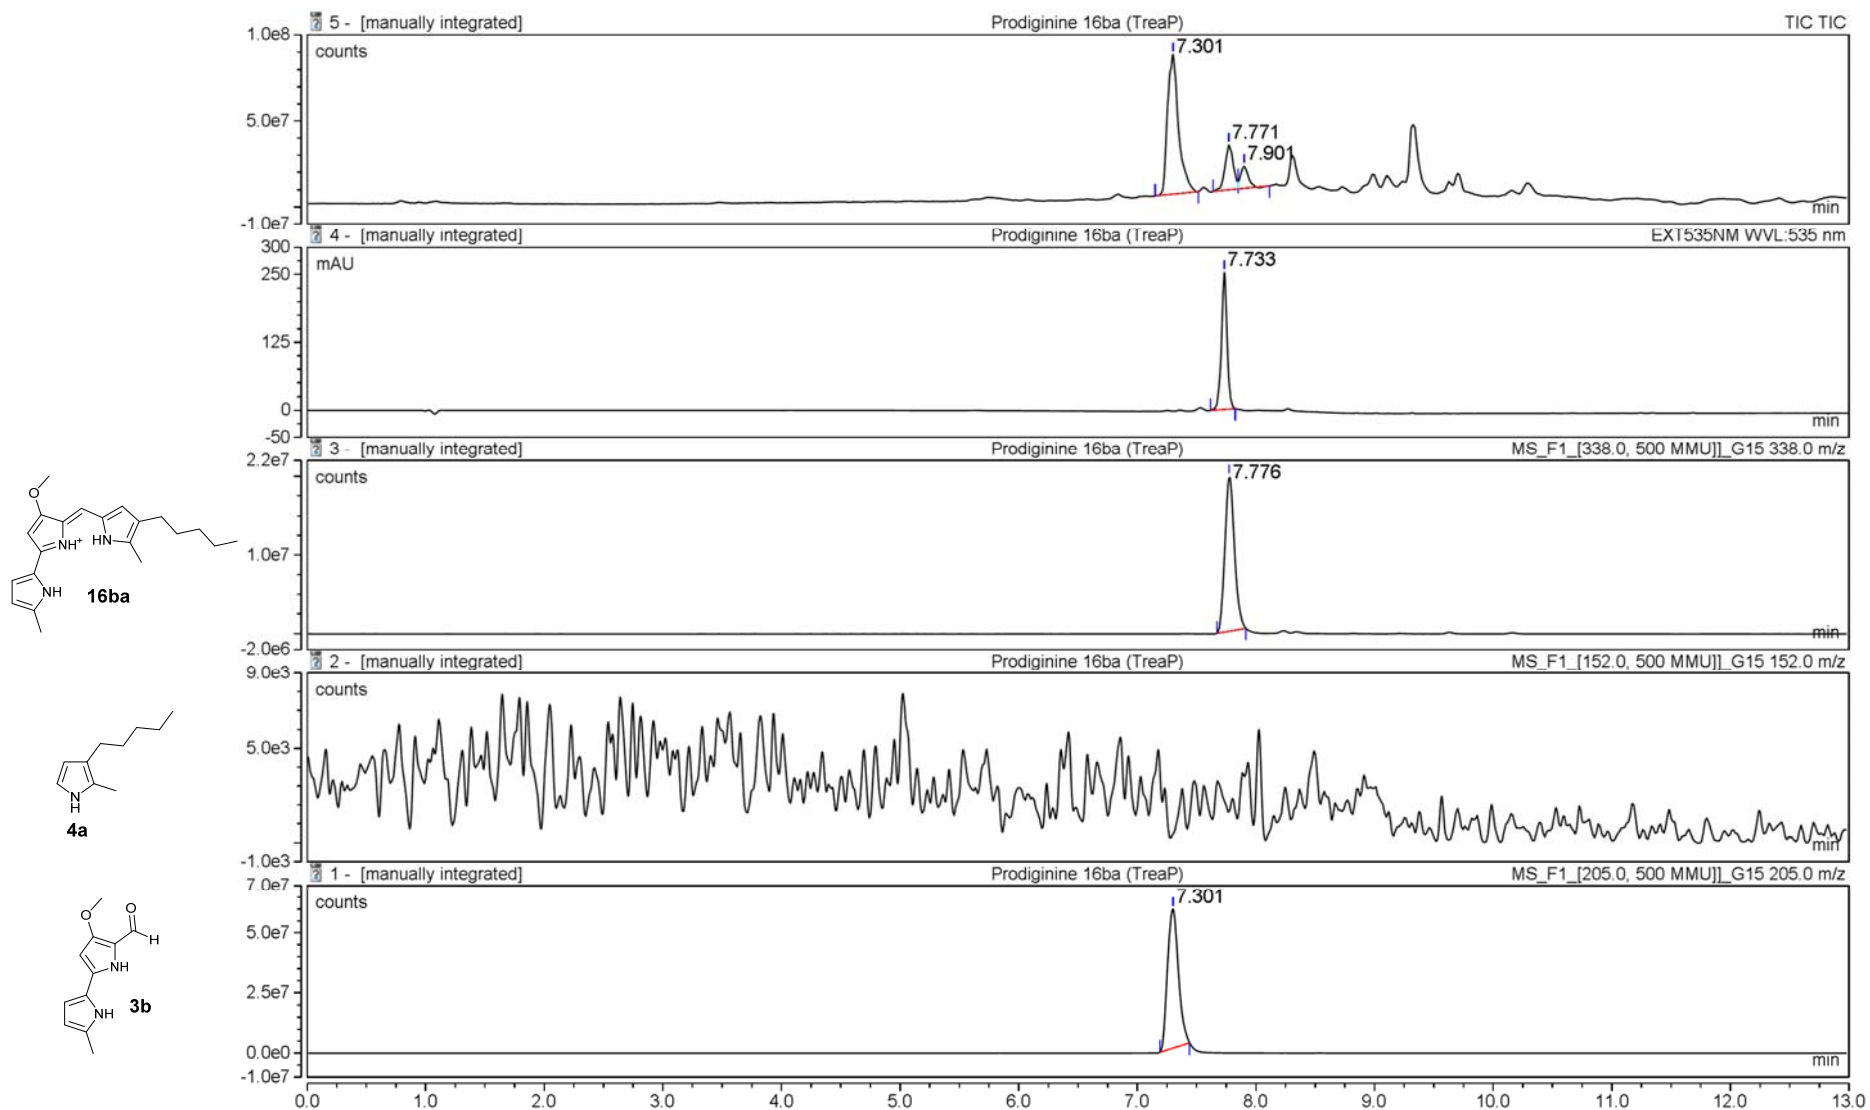

**Figure S30:** LC-MS data [from top to bottom: TIC, UV<sub>535</sub> trace, and EIC of the potential product prodiginine **16ba** (m/z 338.0) and the educts pyrrole **4a** (m/z 152.0) and MBC **3b** (m/z 205.0)] from a representative methanolic reaction extract of the TreaP-catalysed condensation reaction between pyrrole **4a** and MBC **3b**. The structures of starting materials and the expected condensation product are shown on the left-hand site besides the corresponding EIC. Retention time of prodiginine **16ba**  $t_R$  7.73 min.



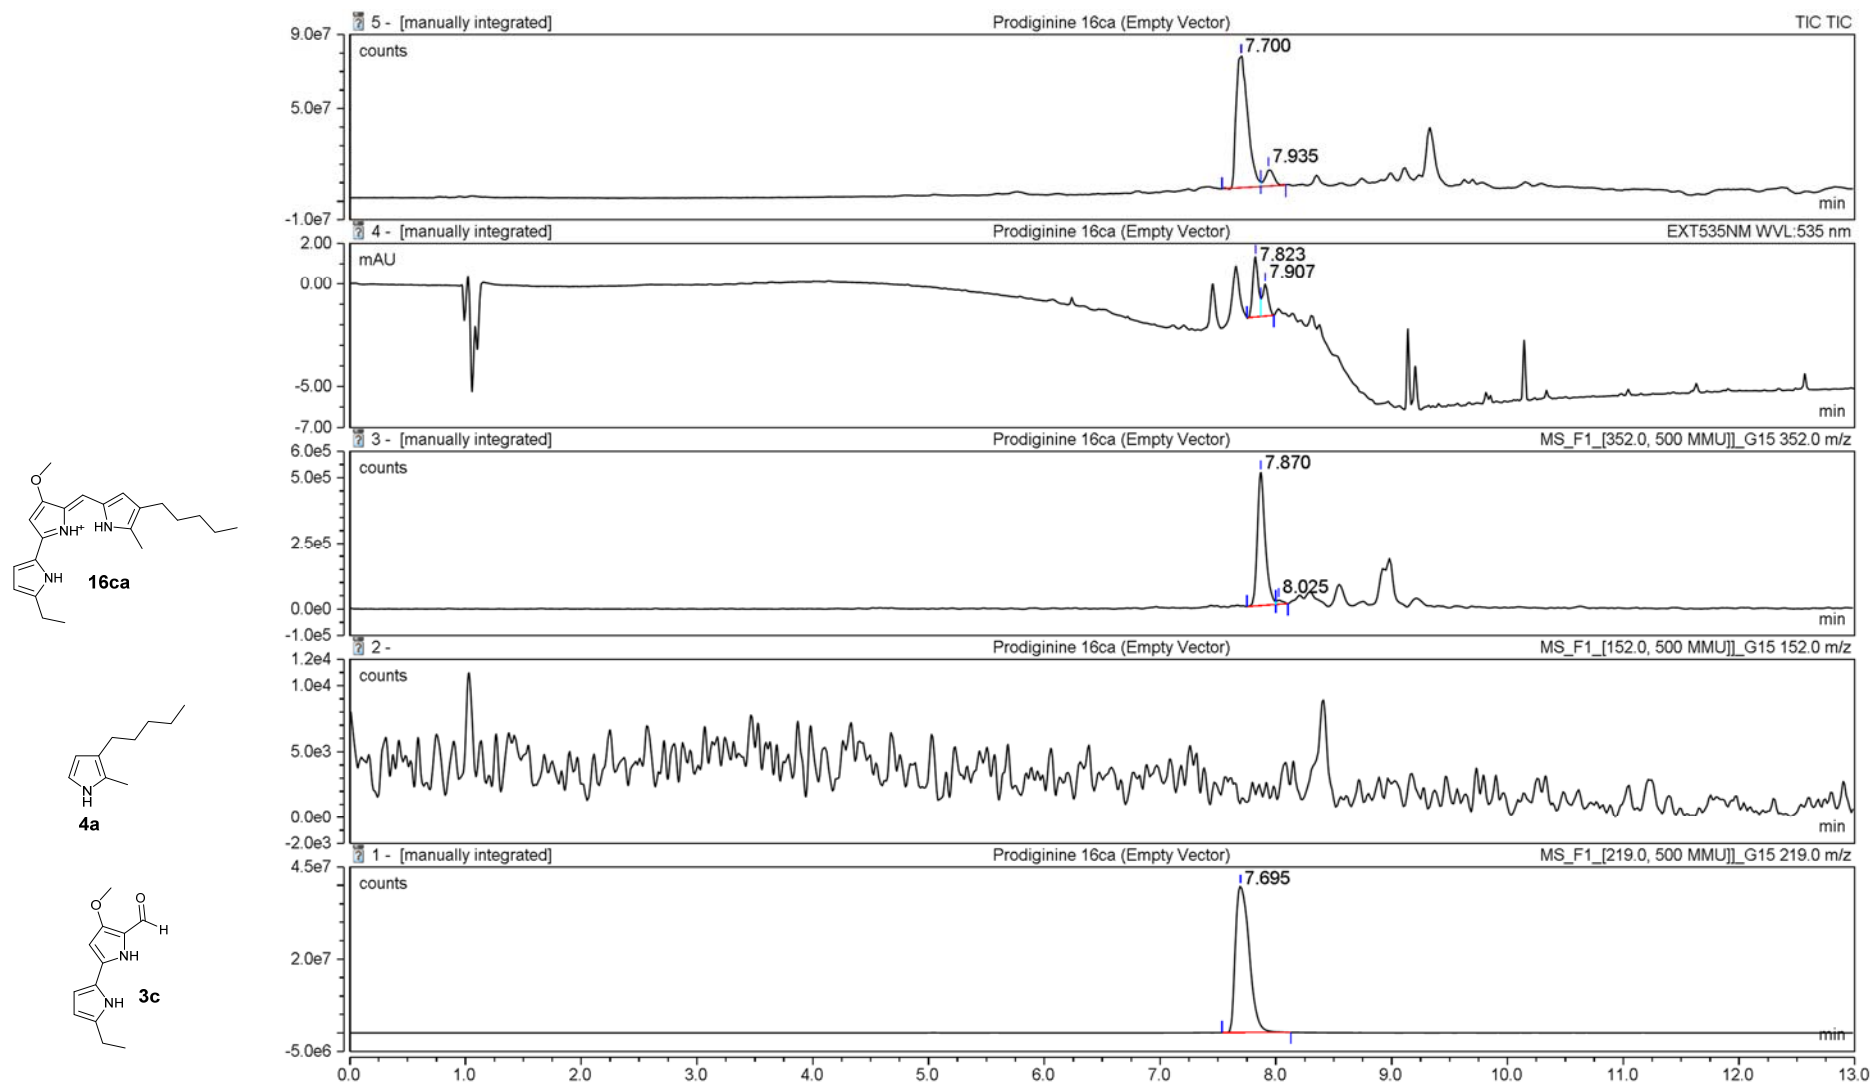

**Figure S31:** LC-MS data [from top to bottom: TIC, UV<sub>535</sub> trace, and extracted ion chromatograms (EIC) of the potential product prodigiosin **16ca** (m/z 352.0) and the educts pyrrole **4a** (m/z 152.0) and MBC **3c** (m/z 219.0)] from a representative methanolic reaction extract of the biocatalytic empty vector control reaction between pyrrole **4a** and MBC **3c**. The structures of starting materials and the expected condensation product are shown on the left-hand site besides the corresponding EIC. The small amount of prodigiosin **16ca** found in the EIC (middle chromatogram) can be traced back to acid-catalysed condensation between pyrrole and MBC during chromatography with 0.1% formic acid. Integration of the corresponding signal from the UV<sub>535</sub> trace gives an integral of 0 mAU·min.

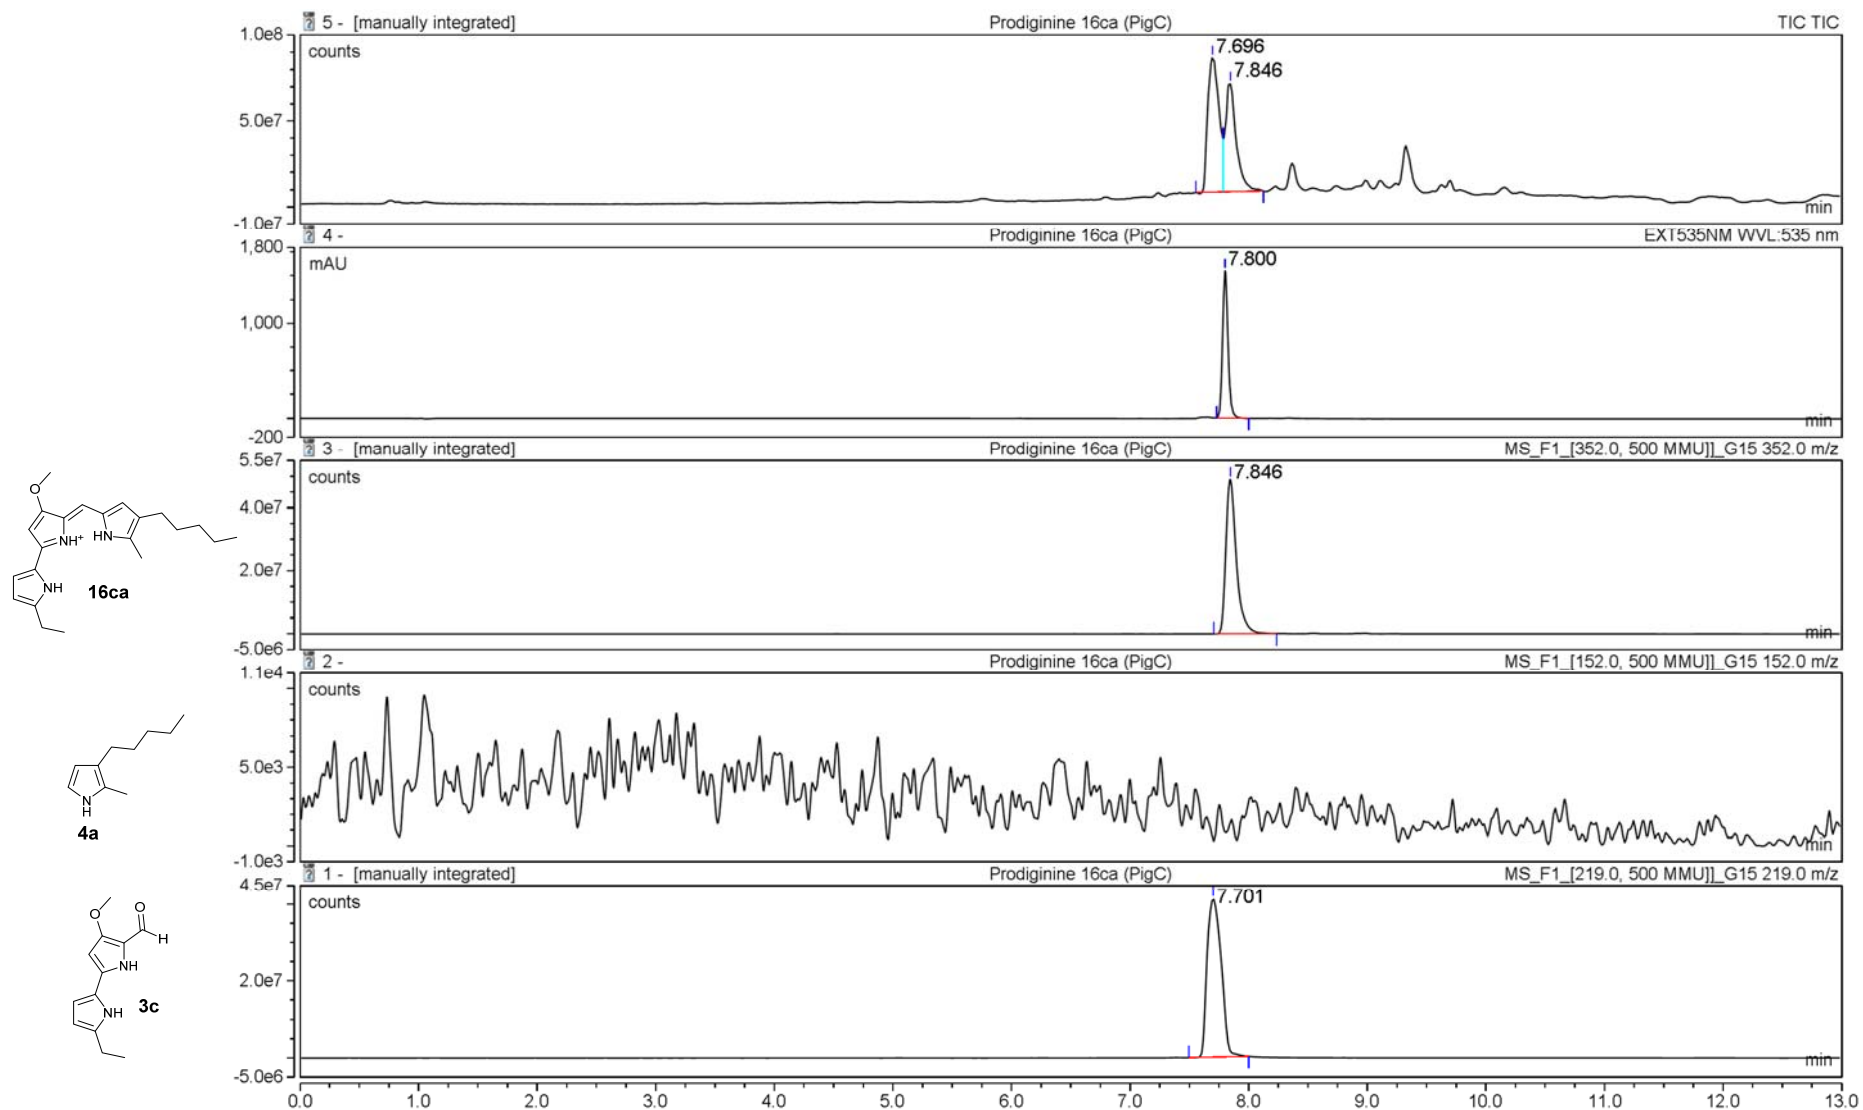

**Figure S32:** LC-MS data [from top to bottom: TIC, UV<sub>535</sub> trace, and EIC of the potential product prodiginine **16ca** (m/z 352.0) and the educts pyrrole **4a** (m/z 152.0) and MBC **3c** (m/z 219.0)] from a representative methanolic reaction extract of the PigC-catalysed condensation reaction between pyrrole **4a** and MBC **3c**. The structures of starting materials and the expected condensation product are shown on the left-hand site besides the corresponding EIC. Retention time of prodiginine **16ca**  $t_R$  7.80 min.

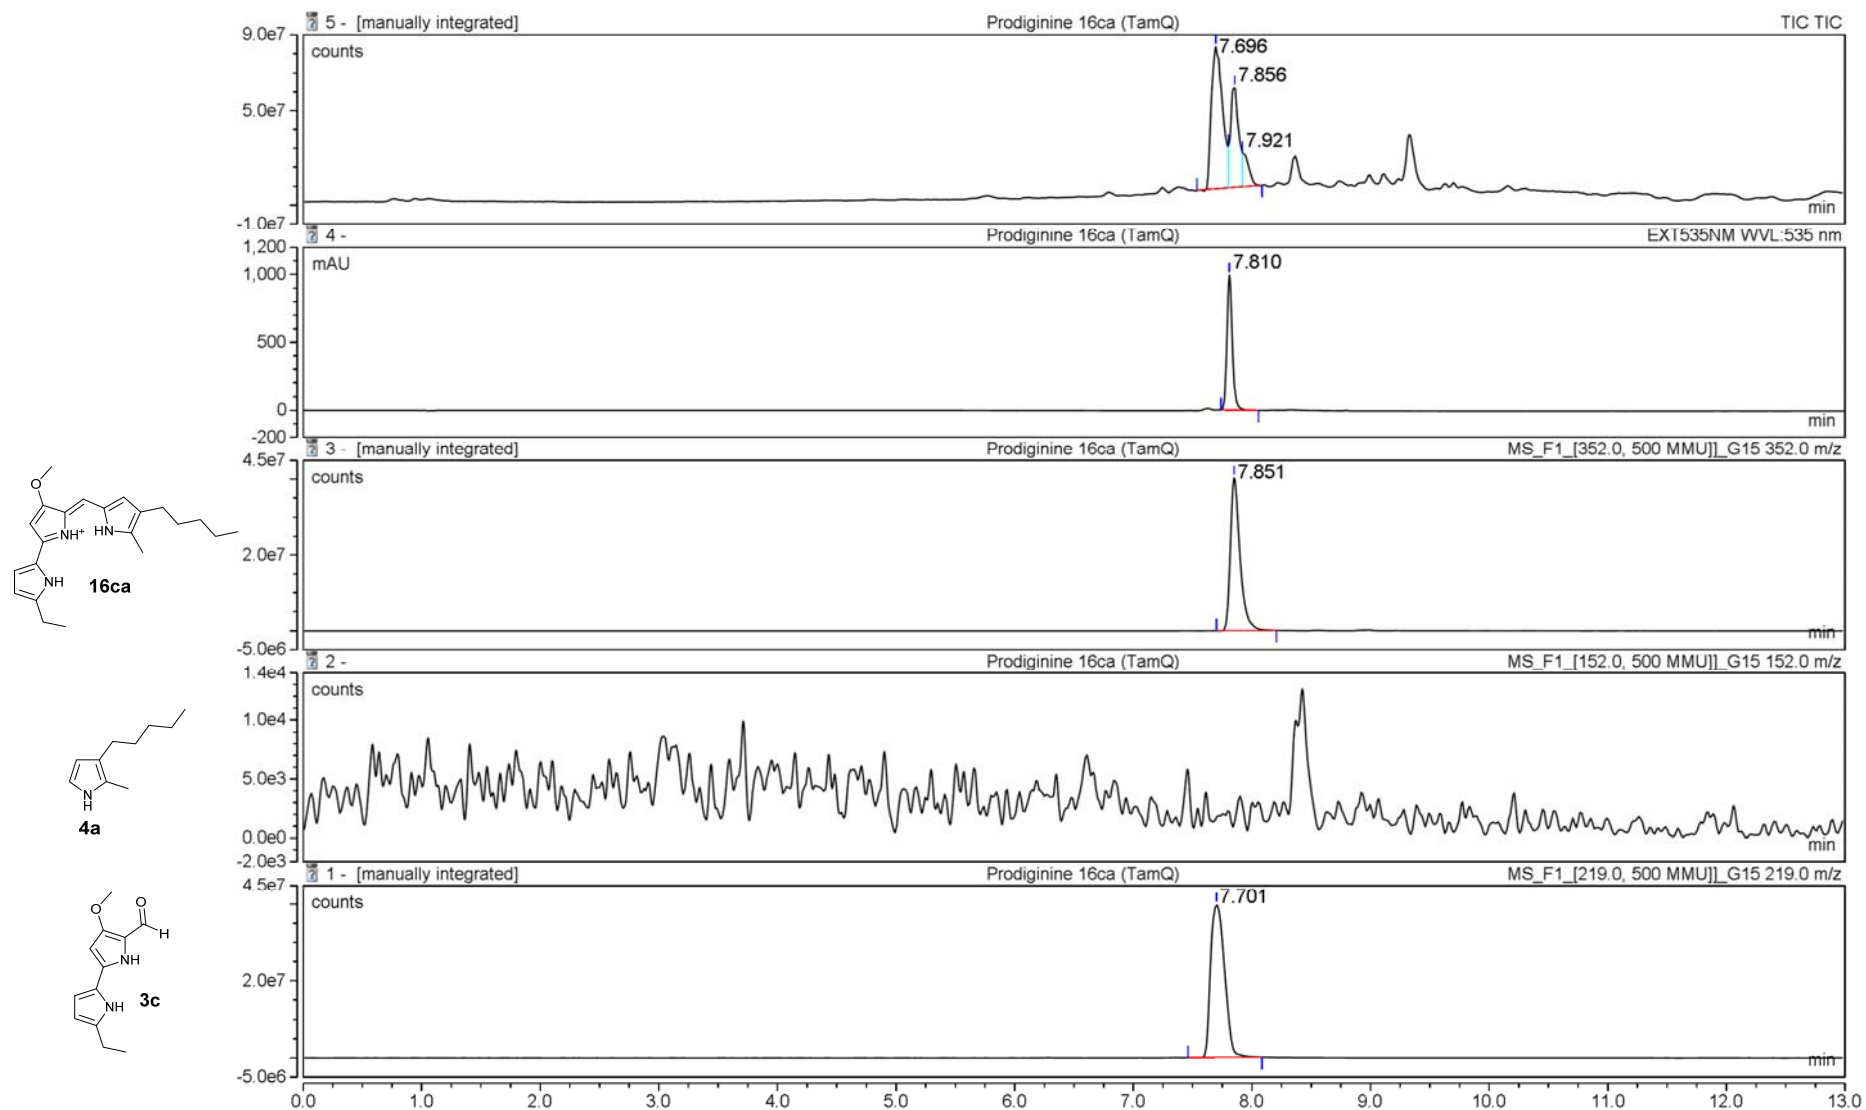

**Figure S33:** LC-MS data [from top to bottom: TIC, UV<sub>535</sub> trace, and EIC of the potential product prodiginine **16ca** (m/z 352.0) and the educts pyrrole **4a** (m/z 152.0) and MBC **3c** (m/z 219.0)] from a representative methanolic reaction extract of the TamQ-catalysed condensation reaction between pyrrole **4a** and MBC **3c**. The structures of starting materials and the expected condensation product are shown on the left-hand site besides the corresponding EIC. Retention time of prodiginine **16ca**  $t_R$  7.81 min.

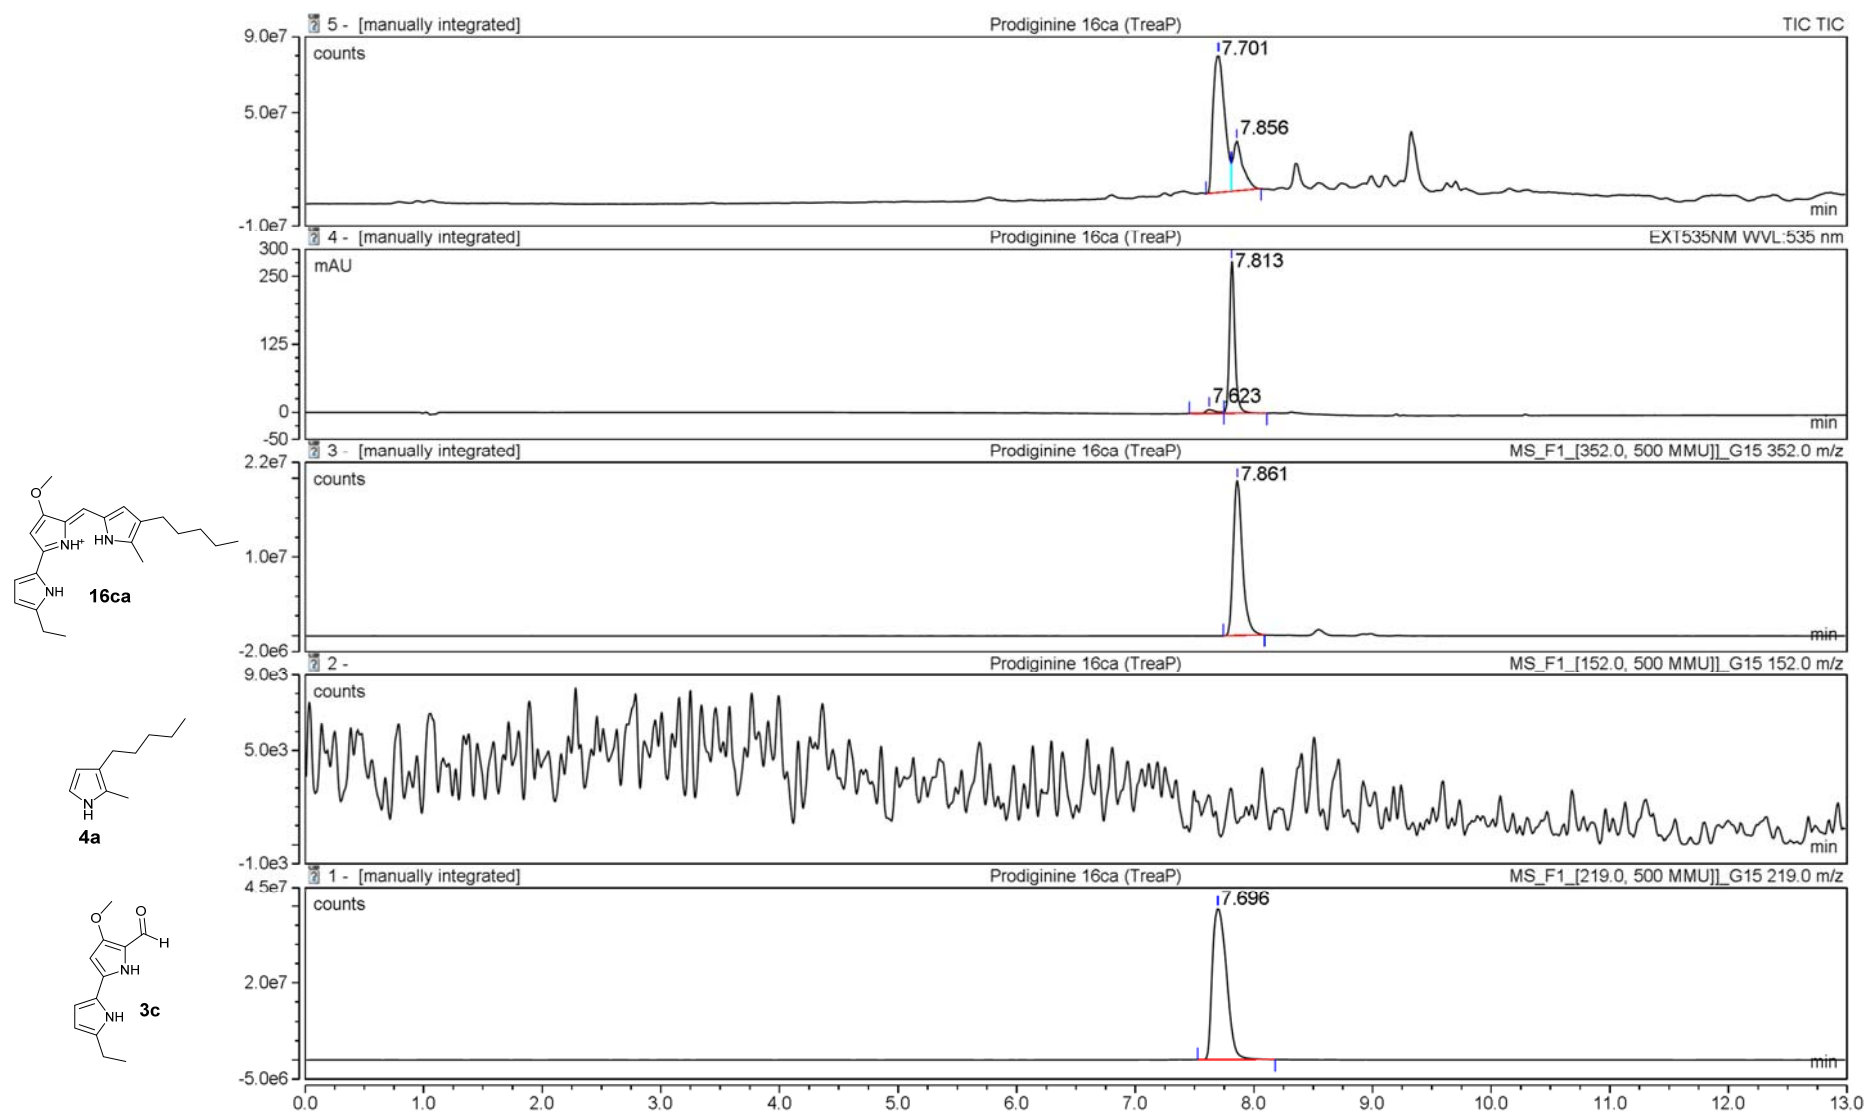

**Figure S34:** LC-MS data [from top to bottom: TIC, UV<sub>535</sub> trace, and EIC of the potential product prodiginine **16ca** (m/z 352.0) and the educts pyrrole **4a** (m/z 152.0) and MBC **3c** (m/z 219.0)] from a representative methanolic reaction extract of the TreaP-catalysed condensation reaction between pyrrole **4a** and MBC **3c**. The structures of starting materials and the expected condensation product are shown on the left-hand site besides the corresponding EIC. Retention time of prodiginine **16ca**  $t_R$  7.81 min.

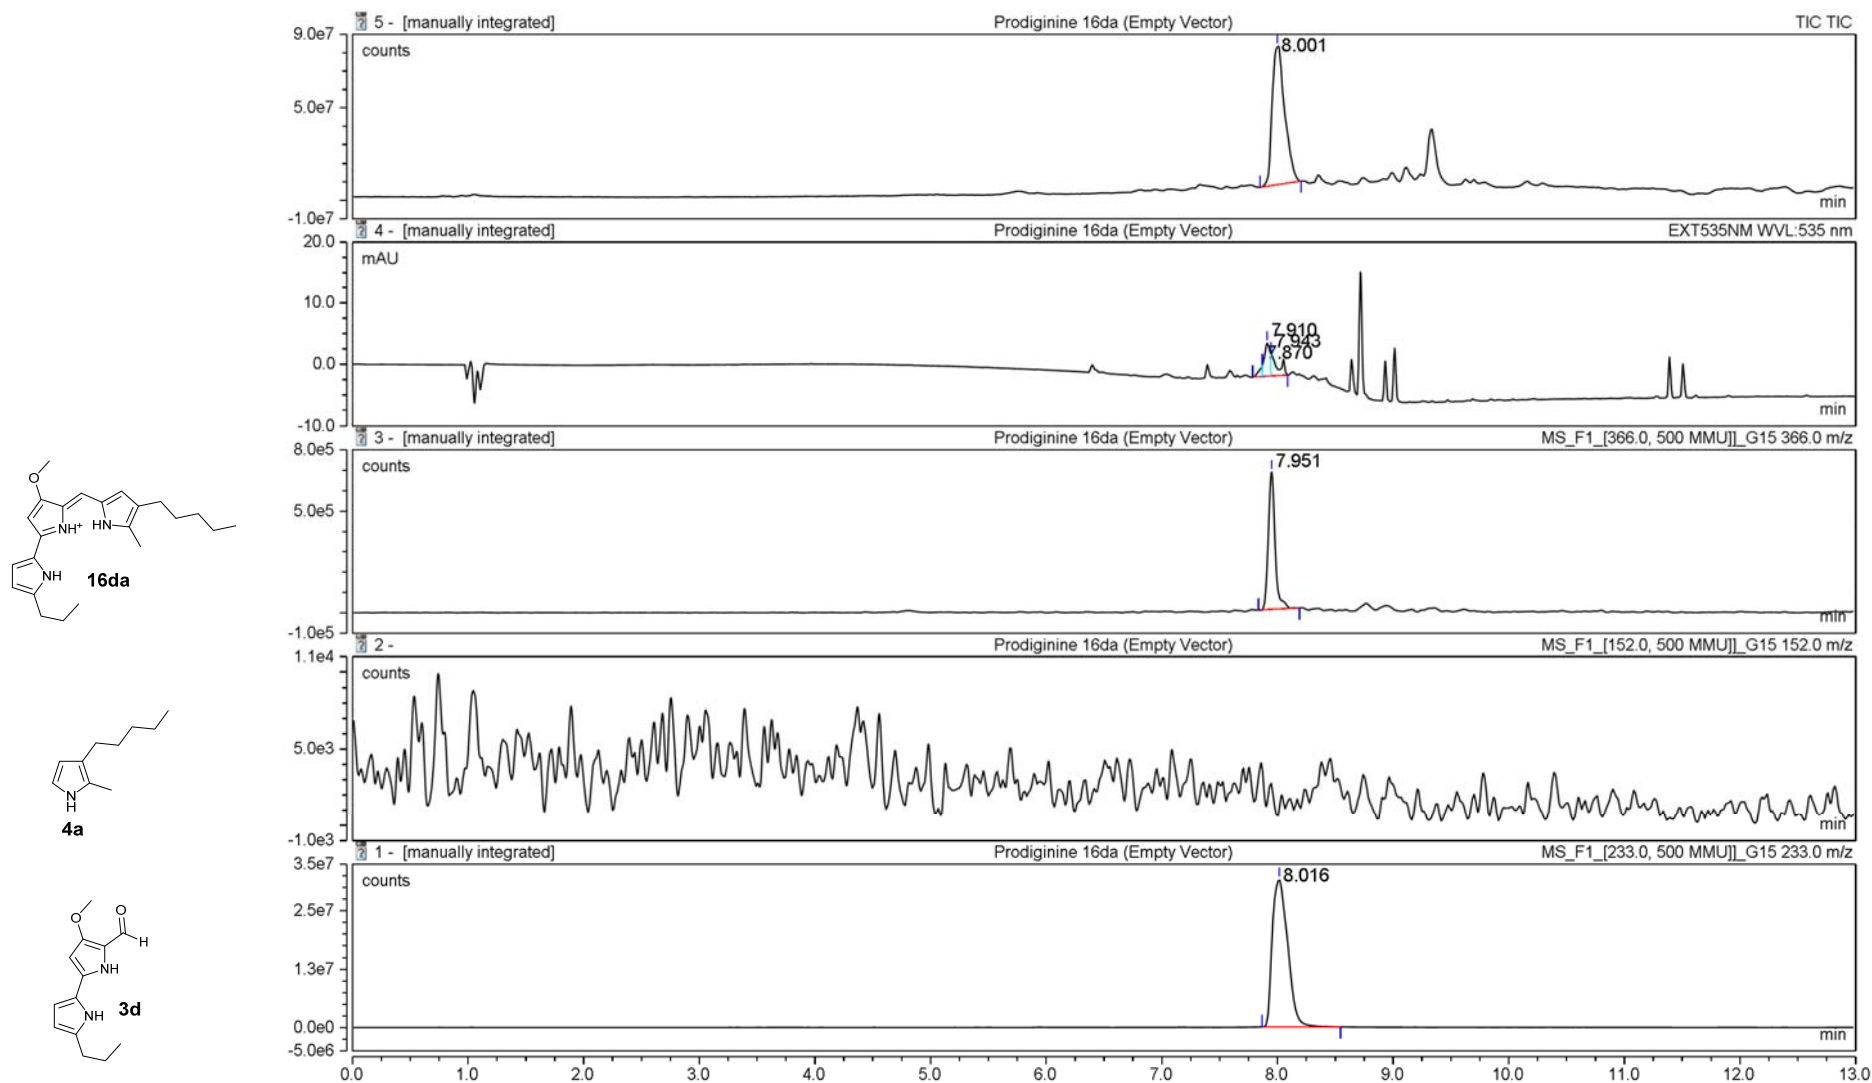

**Figure S35:** LC-MS data [from top to bottom: TIC, UV<sub>535</sub> trace, and extracted ion chromatograms (EIC) of the potential product prodigiosin **16da** (m/z 366.0) and the educts pyrrole **4a** (m/z 152.0) and MBC **3d** (m/z 233.0)] from a representative methanolic reaction extract of the biocatalytic empty vector control reaction between pyrrole **4a** and MBC **3d**. The structures of starting materials and the expected condensation product are shown on the left-hand site besides the corresponding EIC. The small amount of prodigiosin **16da** found in the EIC (middle chromatogram) can be traced back to acid-catalysed condensation between pyrrole and MBC during chromatography with 0.1% formic acid. Integration of the corresponding signal from the UV<sub>535</sub> trace gives an integral of 0 mAU·min.

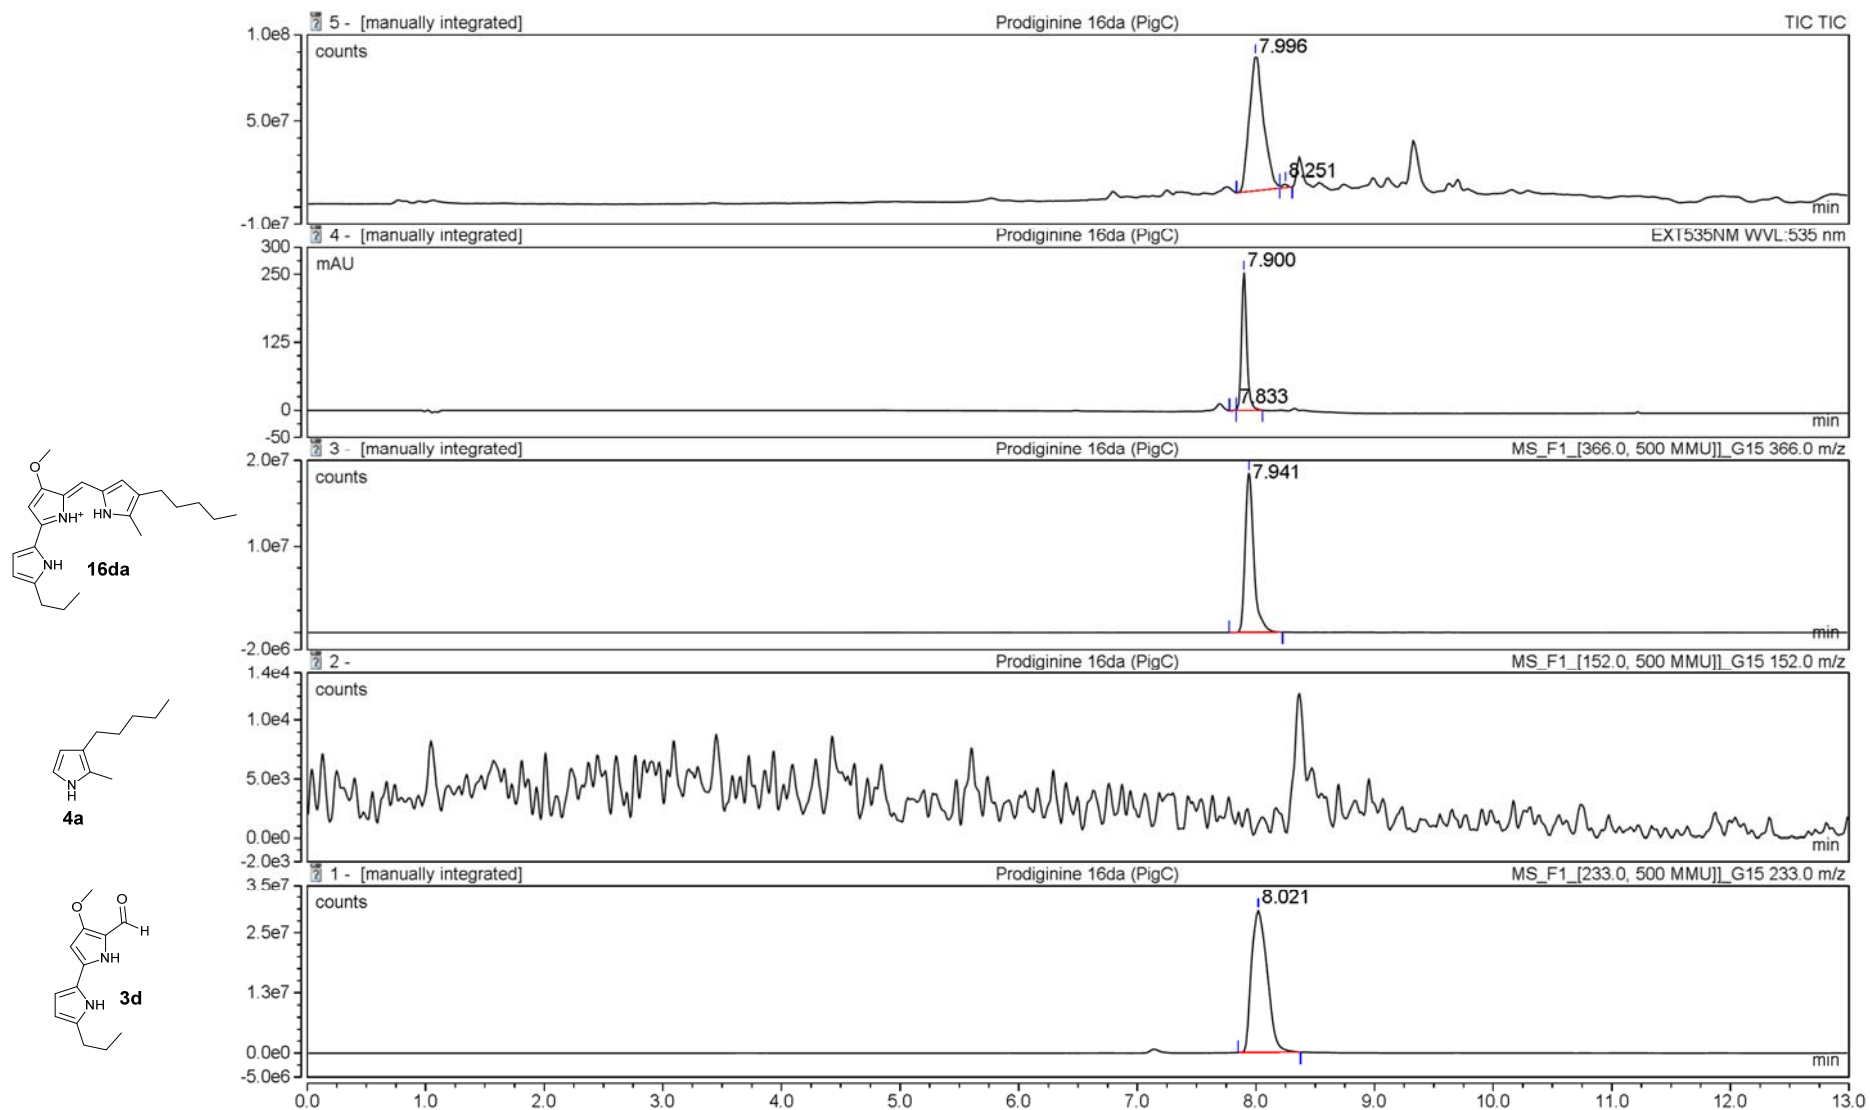

**Figure S36:** LC-MS data [from top to bottom: TIC, UV<sub>535</sub> trace, and EIC of the potential product prodiginine **16da** (m/z 366.0) and the educts pyrrole **4a** (m/z 152.0) and MBC **3d** (m/z 233.0)] from a representative methanolic reaction extract of the PigC-catalysed condensation reaction between pyrrole **4a** and MBC **3d**. The structures of starting materials and the expected condensation product are shown on the left-hand site besides the corresponding EIC. Retention time of prodiginine **16da**  $t_R$  7.90 min.

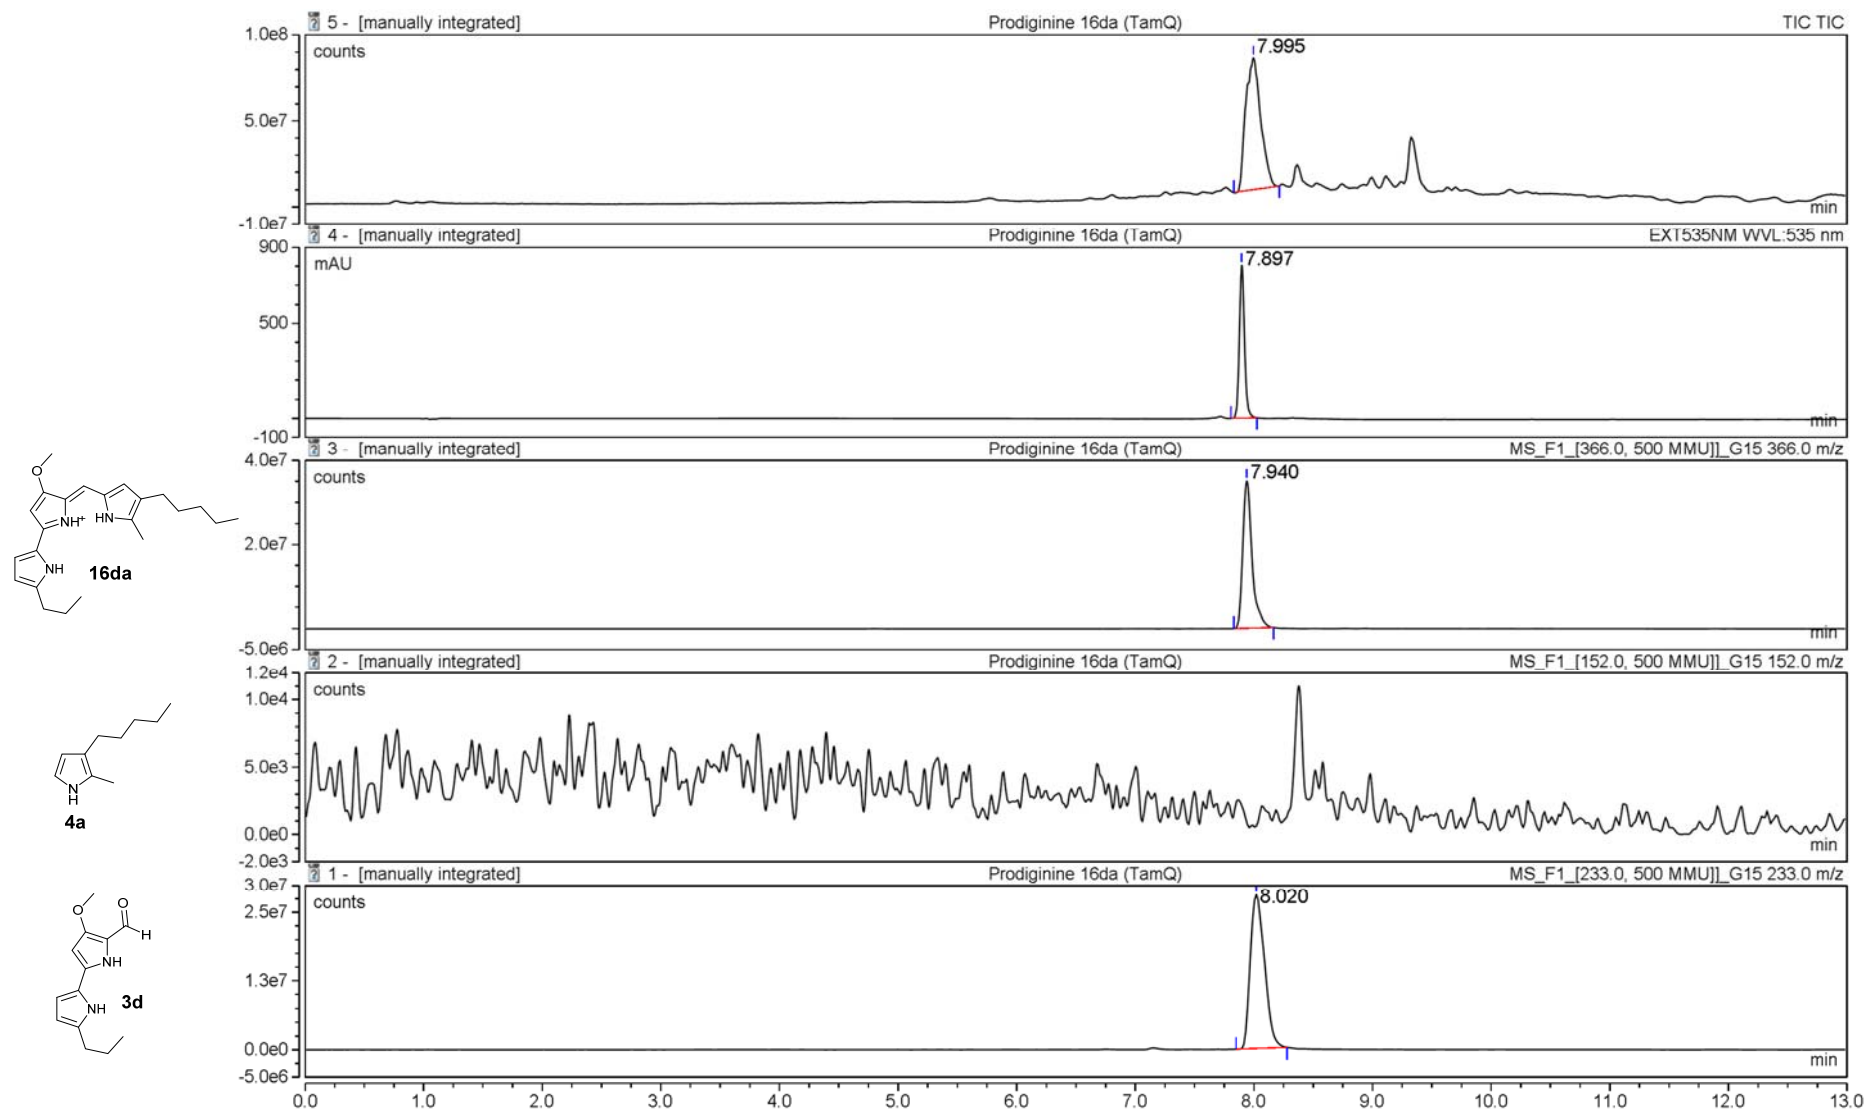

**Figure S37:** LC-MS data [from top to bottom: TIC, UV<sub>535</sub> trace, and EIC of the potential product prodiginine **16da** (m/z 366.0) and the educts pyrrole **4a** (m/z 152.0) and MBC **3d** (m/z 233.0)] from a representative methanolic reaction extract of the TamQ-catalysed condensation reaction between pyrrole **4a** and MBC **3d**. The structures of starting materials and the expected condensation product are shown on the left-hand site besides the corresponding EIC. Retention time of prodiginine **16da**  $t_R$  7.90 min.

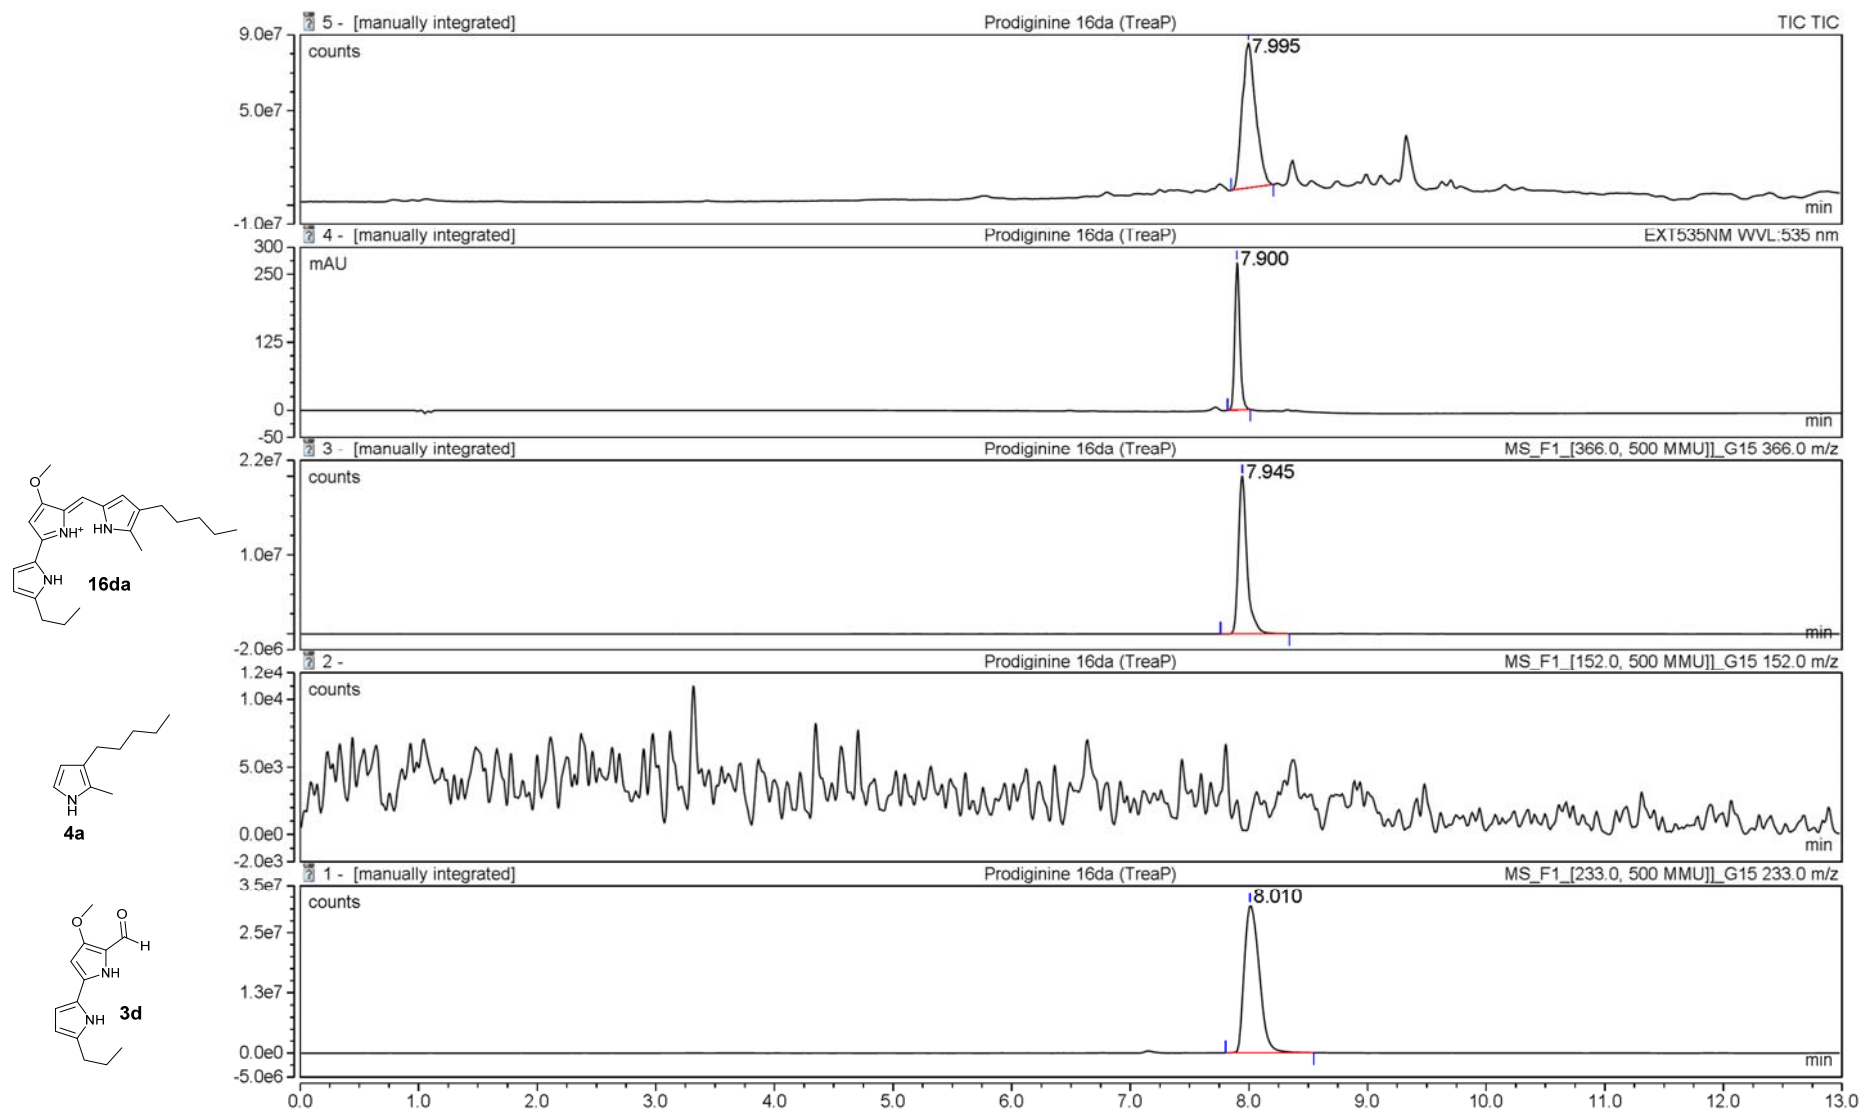

**Figure S38:** LC-MS data [from top to bottom: TIC, UV<sub>535</sub> trace, and EIC of the potential product prodiginine **16da** (m/z 366.0) and the educts pyrrole **4a** (m/z 152.0) and MBC **3d** (m/z 233.0)] from a representative methanolic reaction extract of the TreaP-catalysed condensation reaction between pyrrole **4a** and MBC **3d**. The structures of starting materials and the expected condensation product are shown on the left-hand site besides the corresponding EIC. Retention time of prodiginine **16da**  $t_R$  7.90 min.



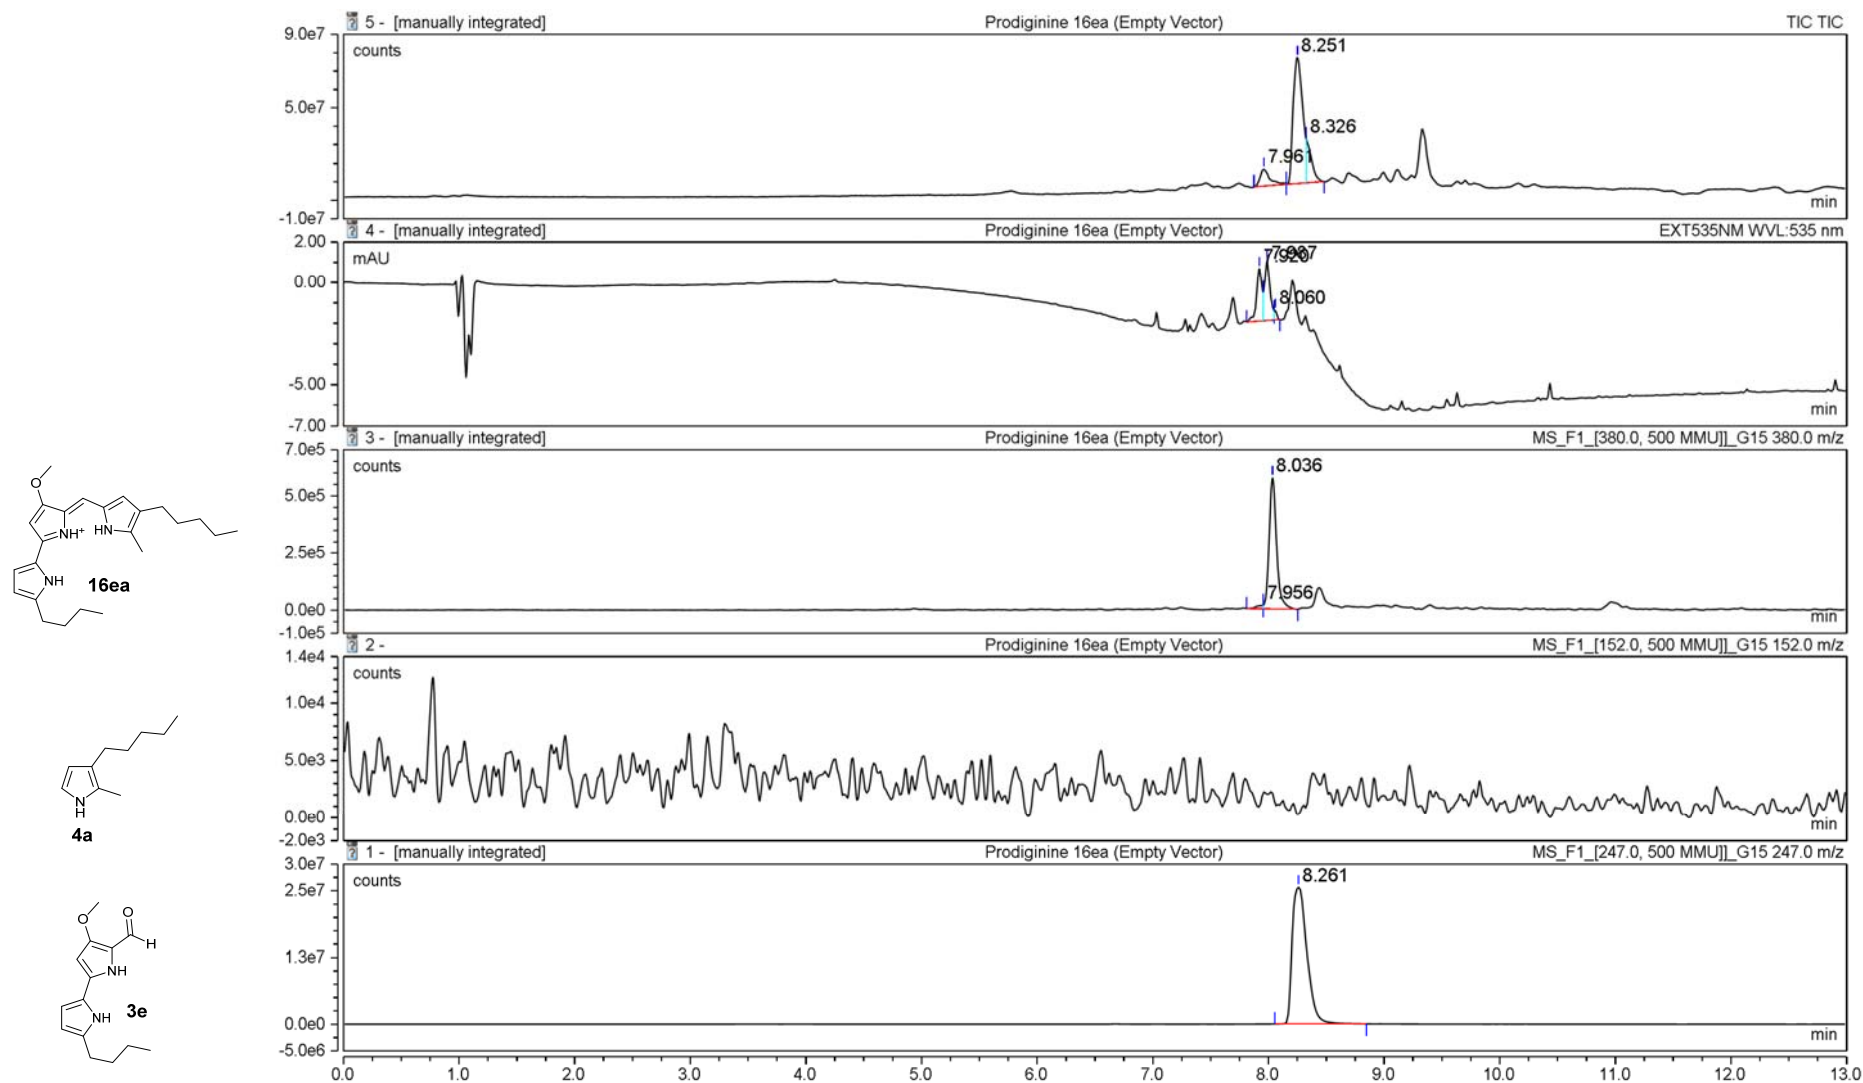

**Figure S39:** LC-MS data [from top to bottom: TIC, UV<sub>535</sub> trace, and extracted ion chromatograms (EIC) of the potential product prodiginosin **16ea** (m/z 380.0) and the educts pyrrole **4a** (m/z 152.0) and MBC **3e** (m/z 247.0)] from a representative methanolic reaction extract of the biocatalytic empty vector control reaction between pyrrole **4a** and MBC **3e**. The structures of starting materials and the expected condensation product are shown on the left-hand site besides the corresponding EIC. The small amount of prodiginosin **16ea** found in the EIC (middle chromatogram) can be traced back to acid-catalysed condensation between pyrrole and MBC during chromatography with 0.1% formic acid. Integration of the corresponding signal from the UV<sub>535</sub> trace gives an integral of 0 mAU·min.

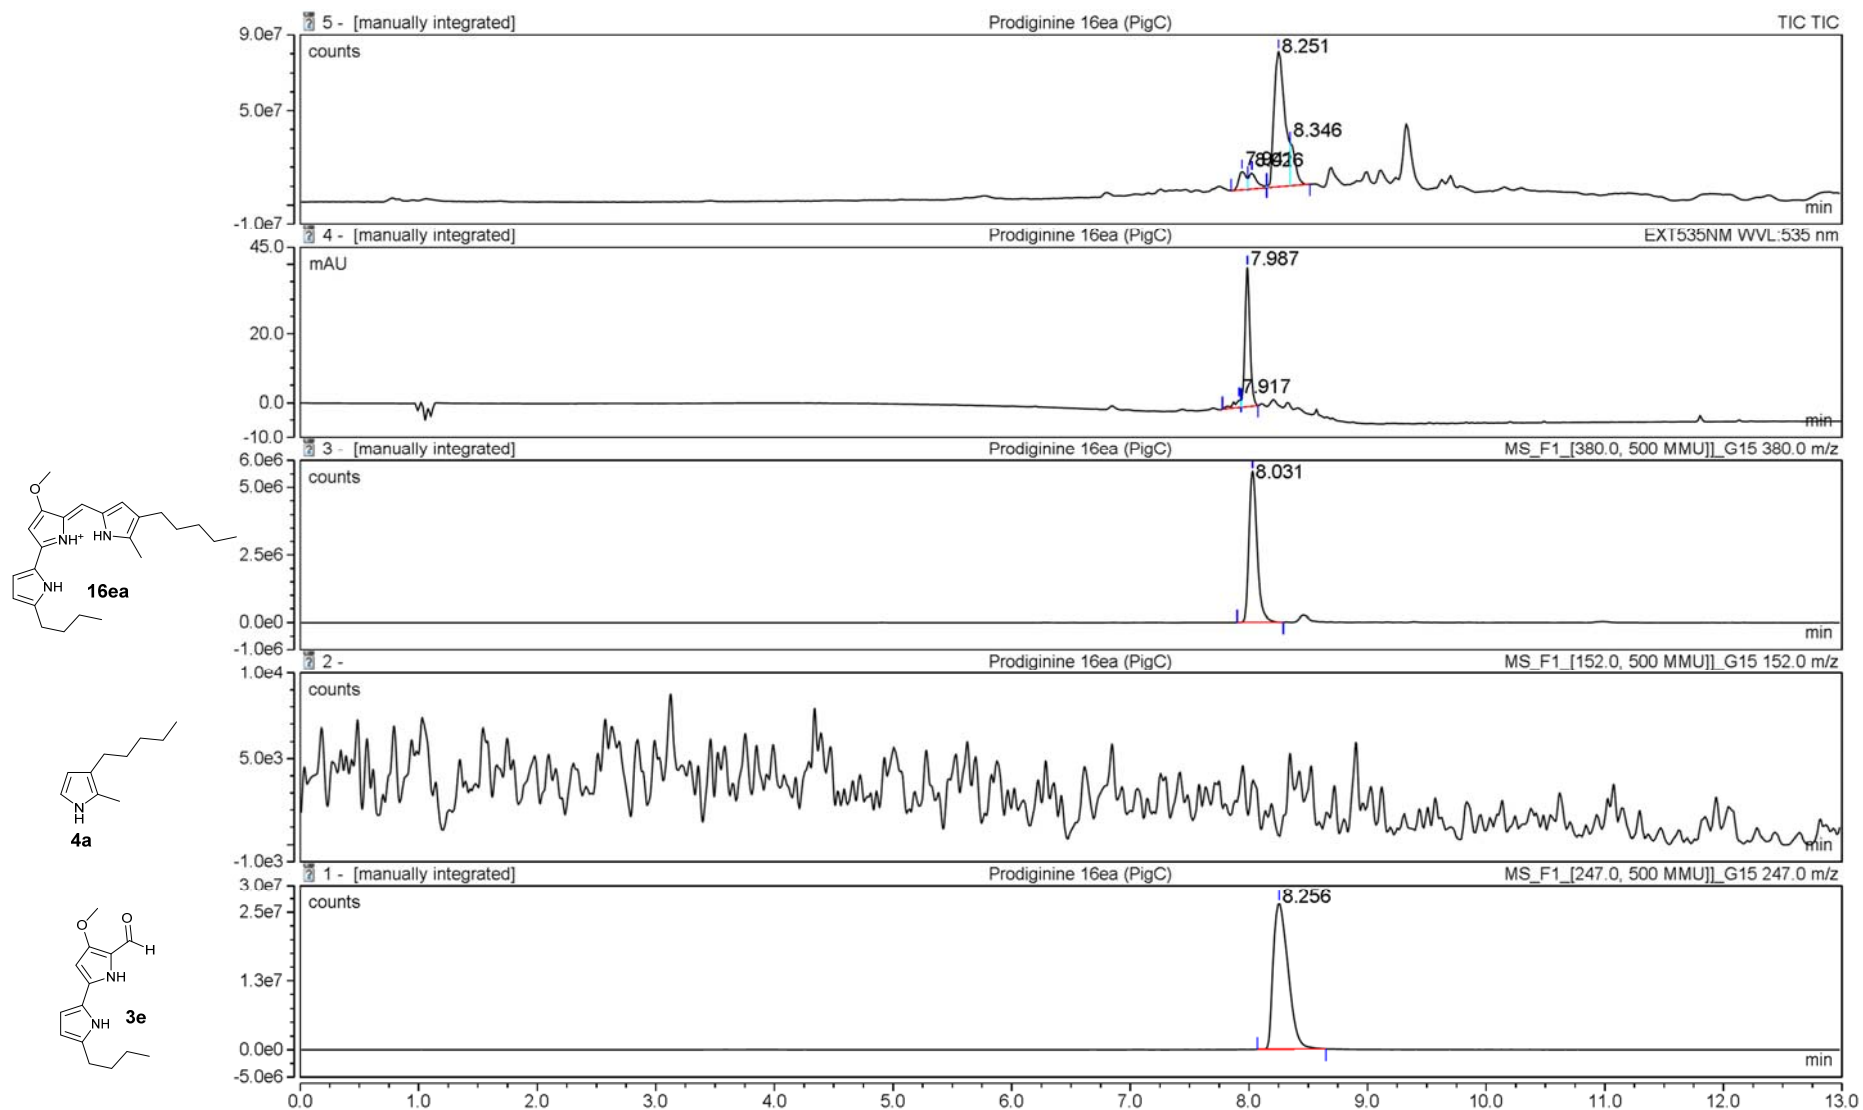

**Figure S40:** LC-MS data [from top to bottom: TIC, UV<sub>535</sub> trace, and EIC of the potential product prodiginine **16ea** (m/z 380.0) and the educts pyrrole **4a** (m/z 152.0) and MBC **3e** (m/z 247.0)] from a representative methanolic reaction extract of the PigC-catalysed condensation reaction between pyrrole **4a** and MBC **3e**. The structures of starting materials and the expected condensation product are shown on the left-hand site besides the corresponding EIC. Retention time of prodiginine **16ea**  $t_R$  7.99 min.

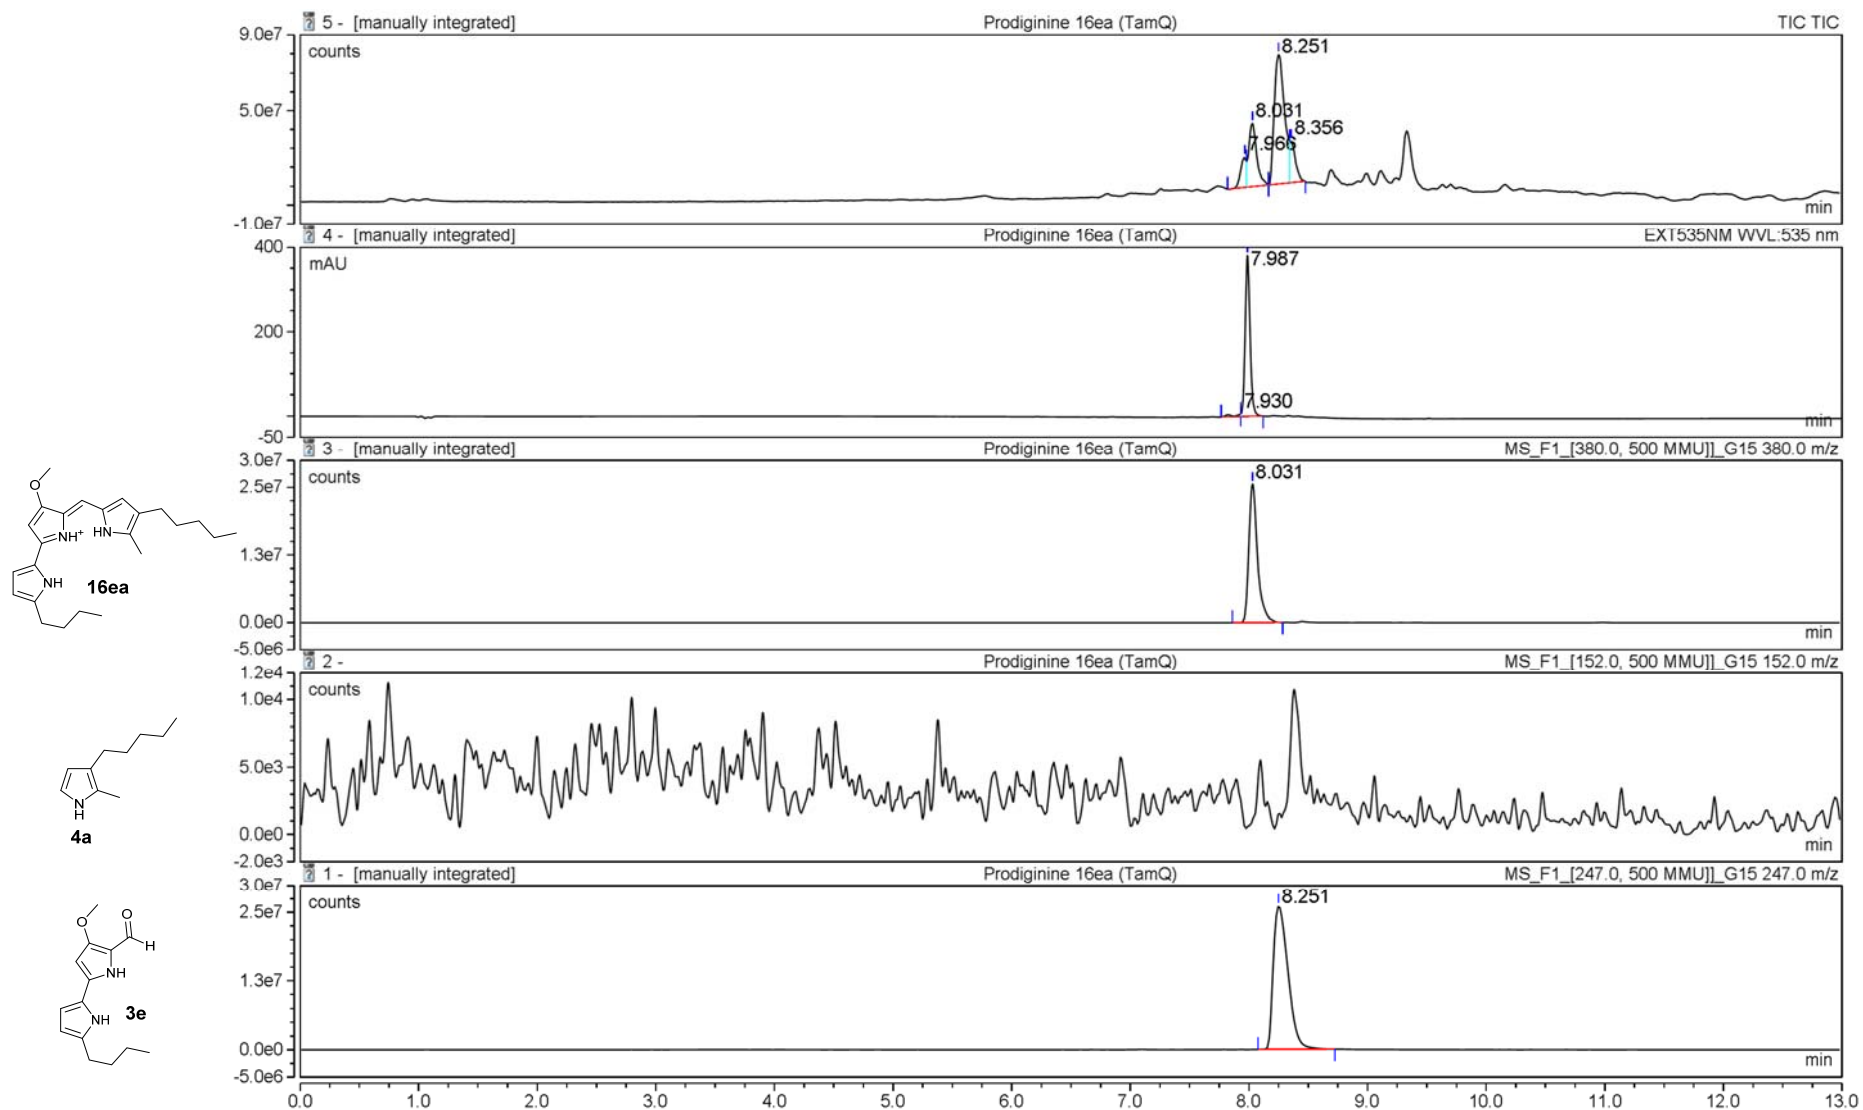

**Figure S41:** LC-MS data [from top to bottom: TIC, UV<sub>535</sub> trace, and EIC of the potential product prodiginine **16ea** (m/z 380.0) and the educts pyrrole **4a** (m/z 152.0) and MBC **3e** (m/z 247.0)] from a representative methanolic reaction extract of the TamQ-catalysed condensation reaction between pyrrole **4a** and MBC **3e**. The structures of starting materials and the expected condensation product are shown on the left-hand side besides the corresponding EIC. Retention time of prodiginine **16ea**  $t_R$  7.99 min.

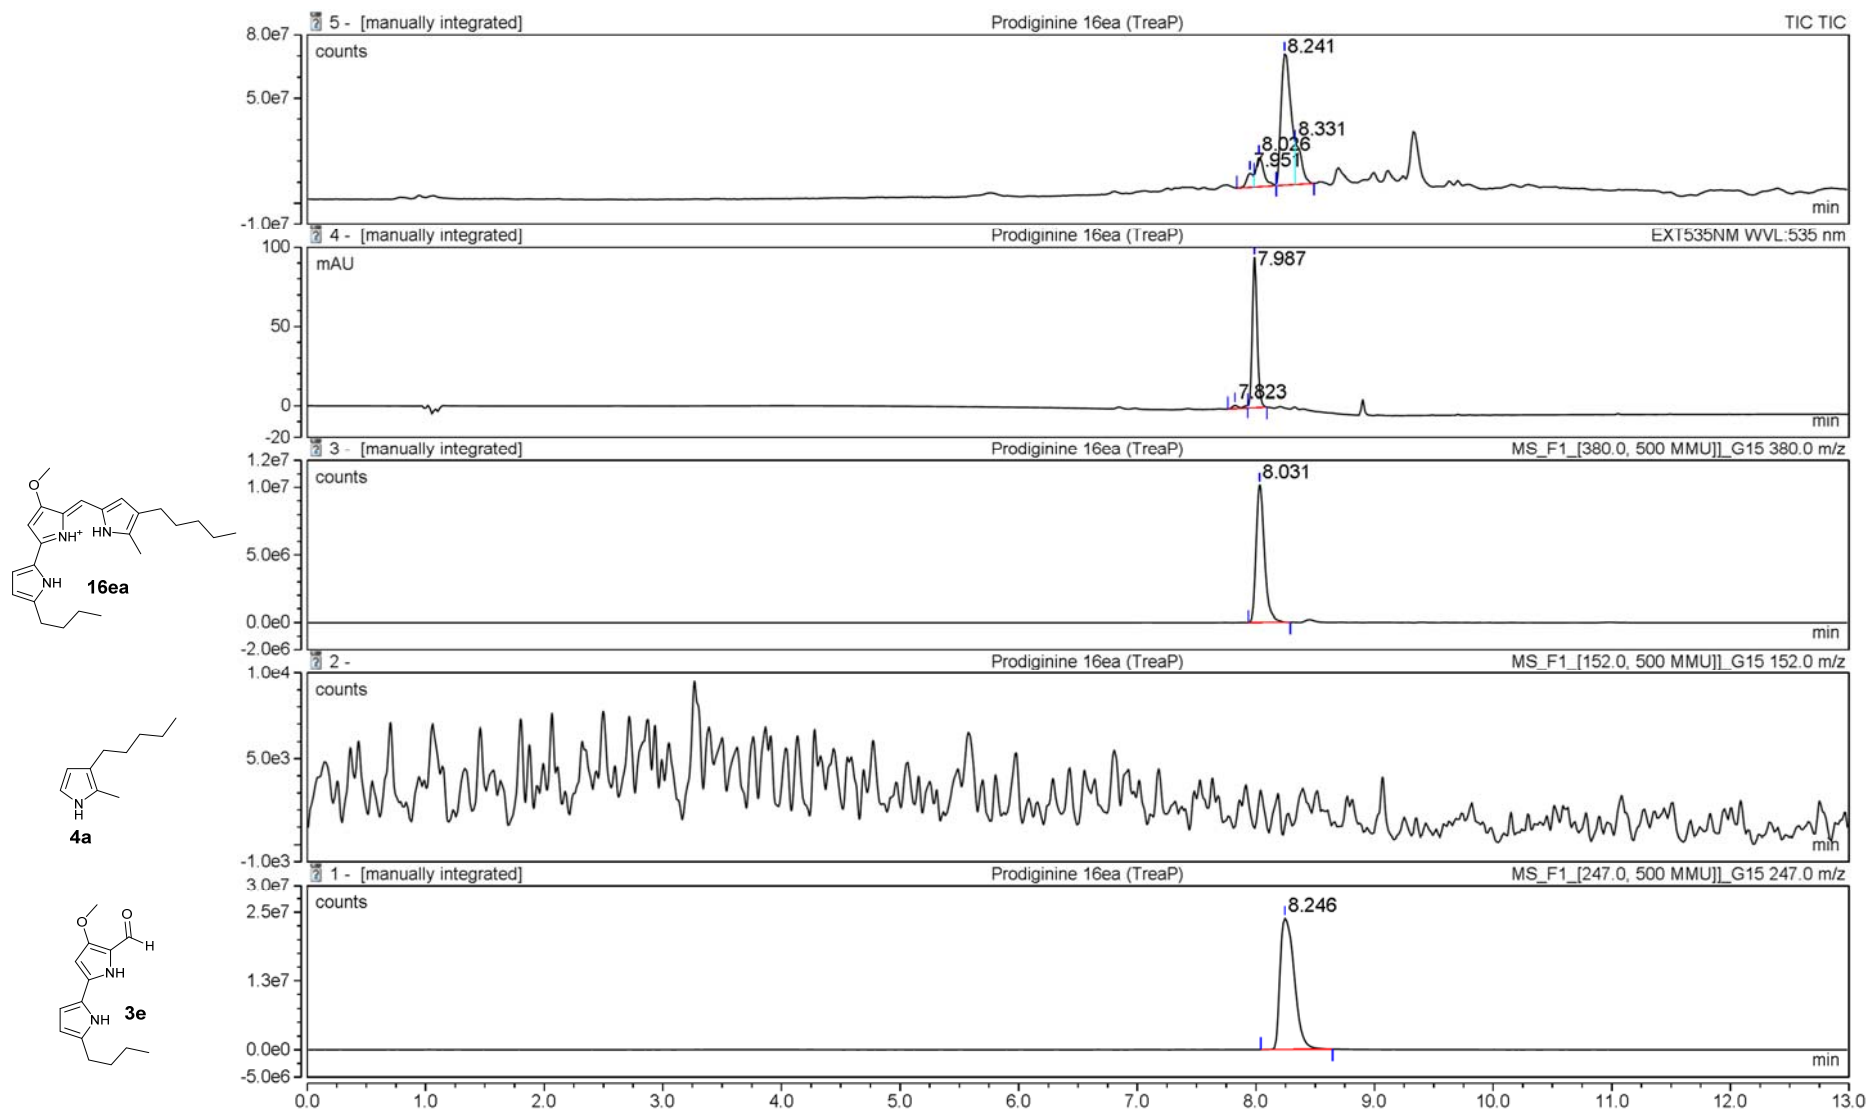

**Figure S42:** LC-MS data [from top to bottom: TIC, UV<sub>535</sub> trace, and EIC of the potential product prodiginine **16ea** (m/z 380.0) and the educts pyrrole **4a** (m/z 152.0) and MBC **3e** (m/z 247.0)] from a representative methanolic reaction extract of the TreaP-catalysed condensation reaction between pyrrole **4a** and MBC **3e**. The structures of starting materials and the expected condensation product are shown on the left-hand site besides the corresponding EIC. Retention time of prodiginine **16ea**  $t_R$  7.99 min.

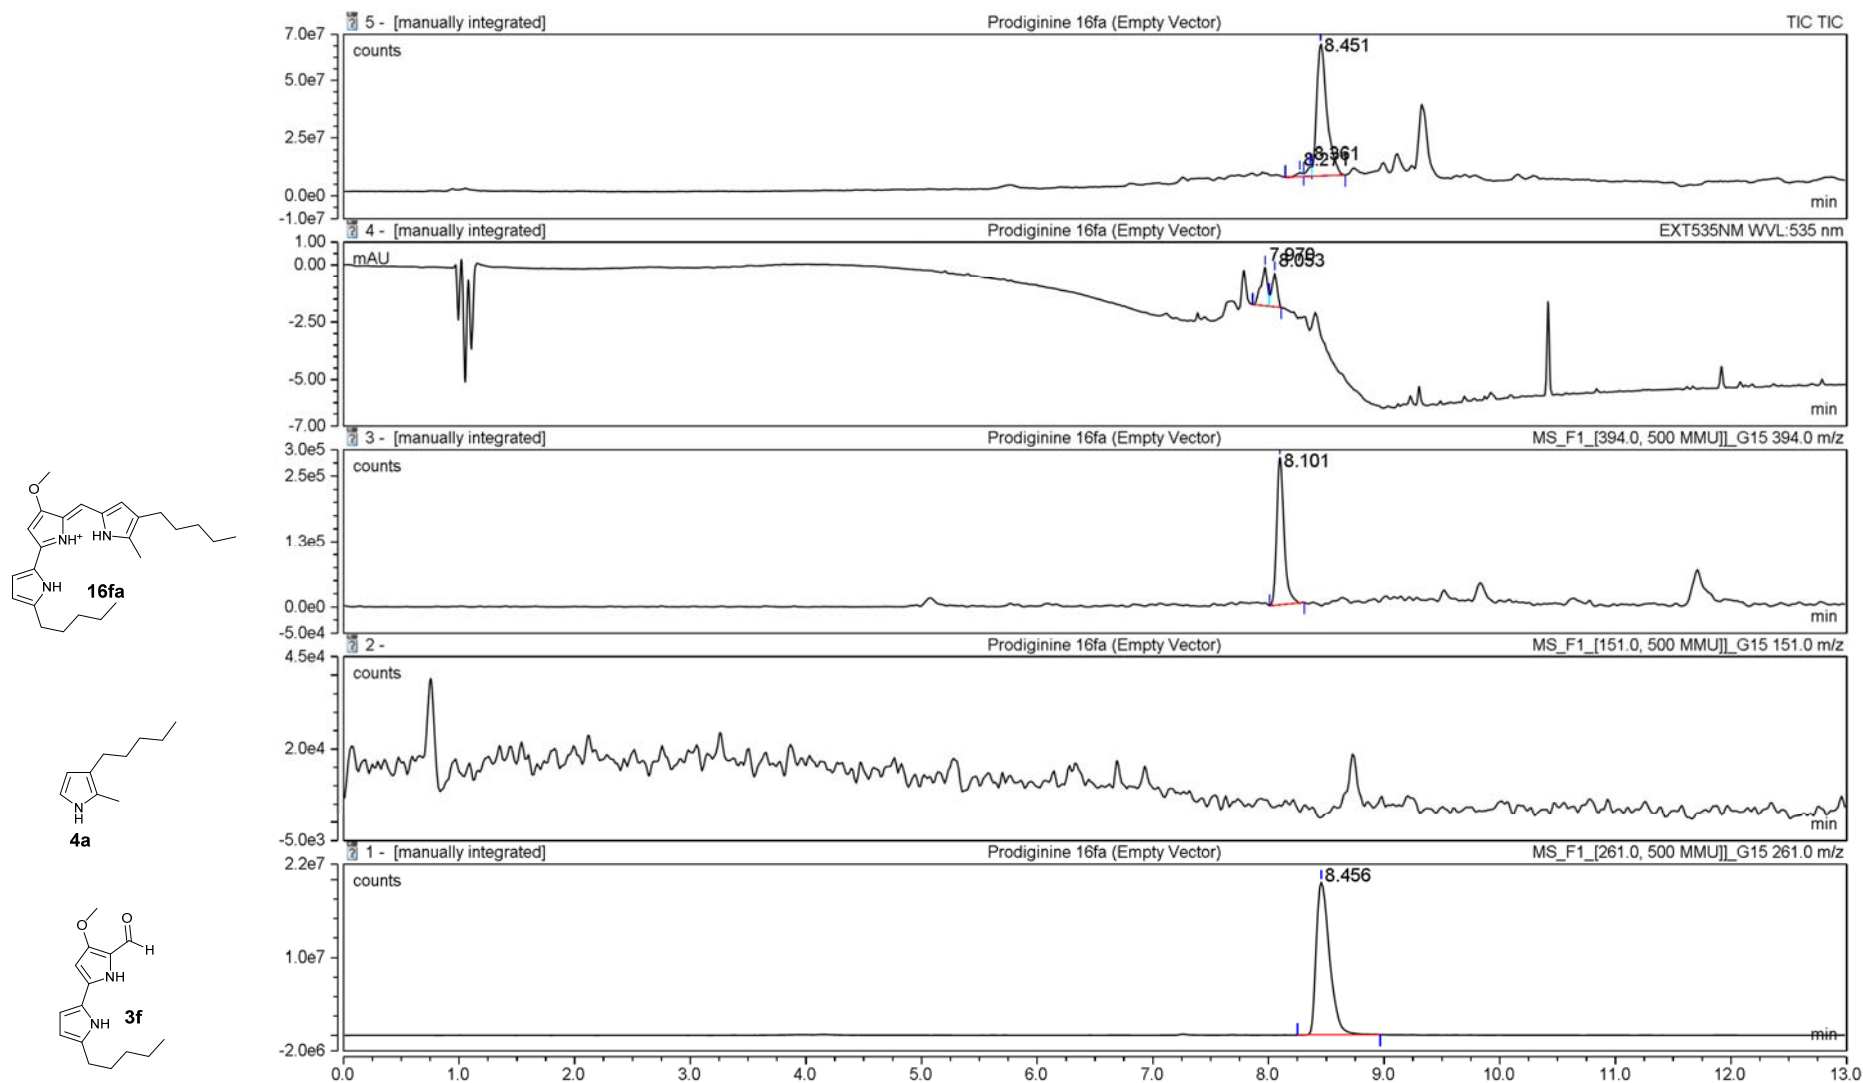

**Figure S43:** LC-MS data [from top to bottom: TIC, UV<sub>535</sub> trace, and extracted ion chromatograms (EIC) of the potential product prodiginosin **16fa** (m/z 394.0) and the educts pyrrole **4a** (m/z 152.0) and MBC **3f** (m/z 261.0)] from a representative methanolic reaction extract of the biocatalytic empty vector control reaction between pyrrole **4a** and MBC **3f**. The structures of starting materials and the expected condensation product are shown on the left-hand site besides the corresponding EIC. The small amount of prodiginosin **16fa** found in the EIC (middle chromatogram) can be traced back to acid-catalysed condensation between pyrrole and MBC during chromatography with 0.1% formic acid. Integration of the corresponding signal from the UV<sub>535</sub> trace gives an integral of 0 mAU·min.

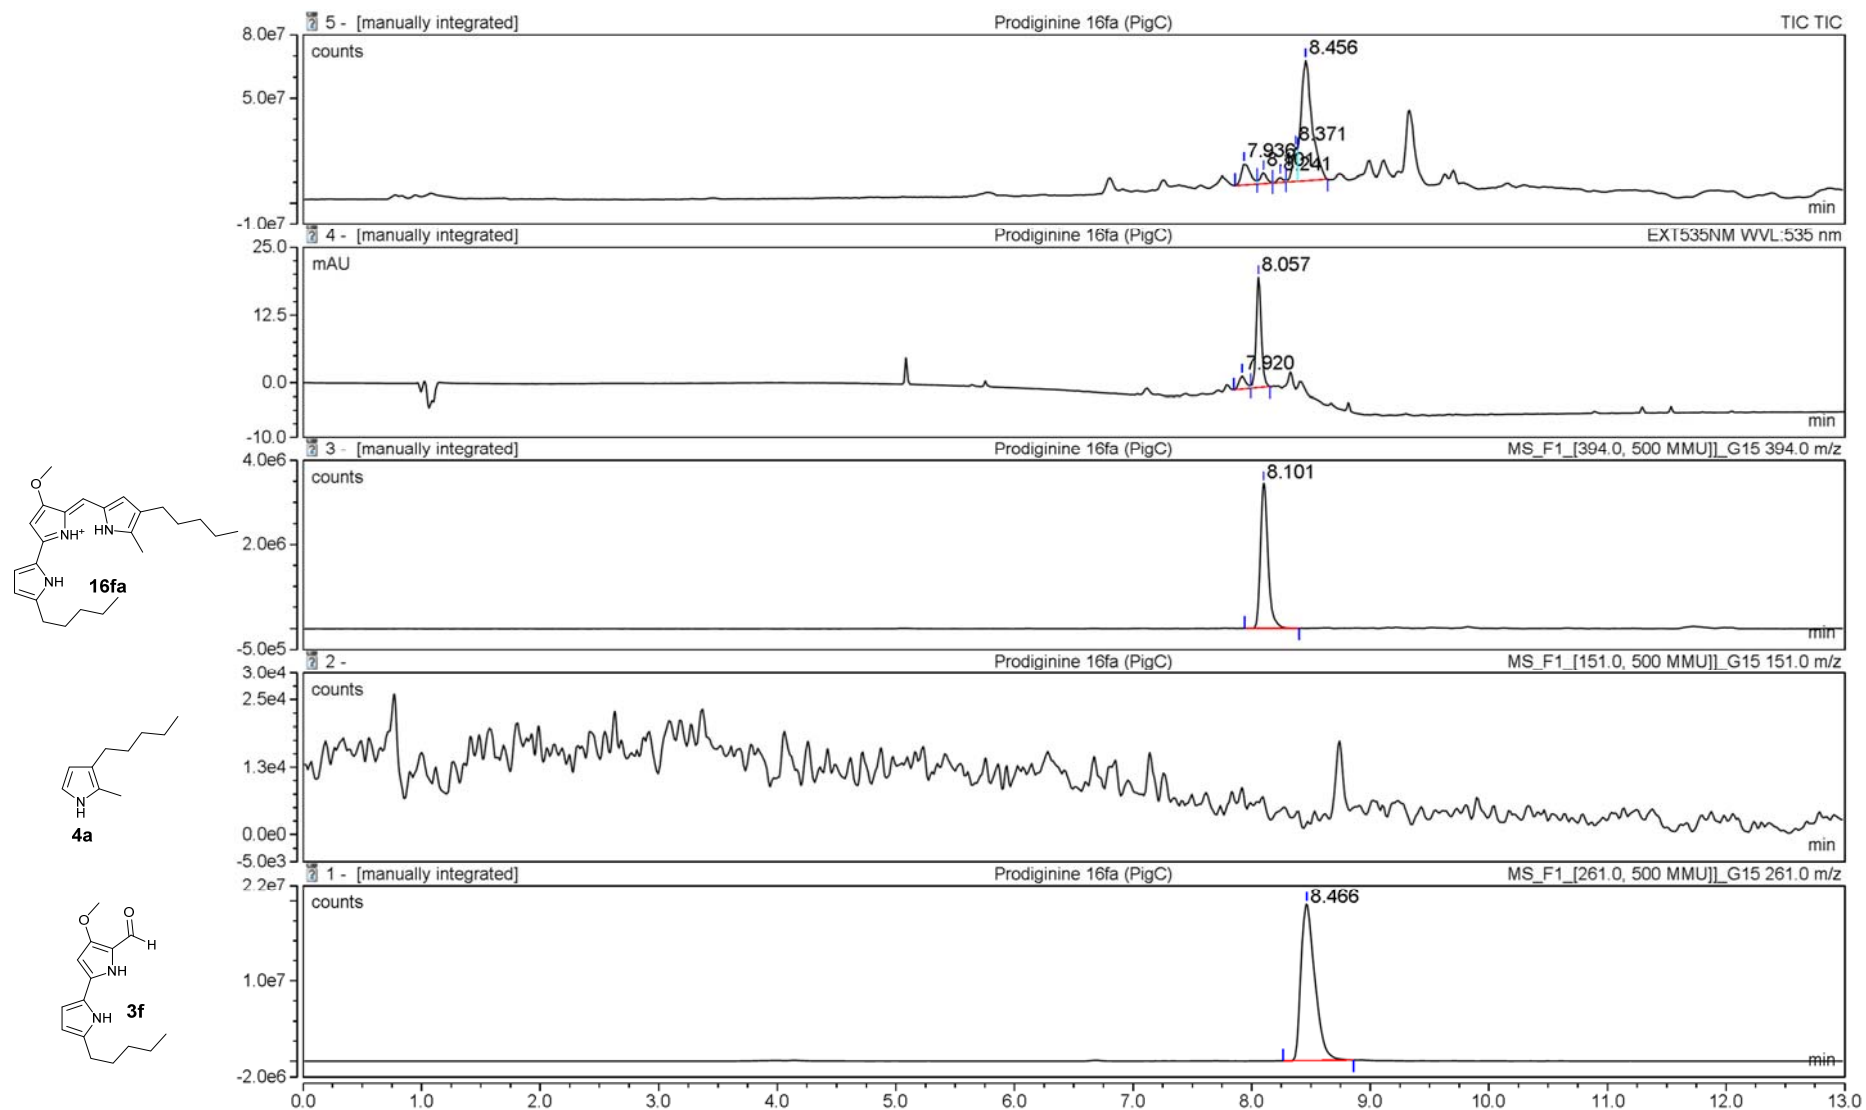

**Figure S44:** LC-MS data [from top to bottom: TIC, UV<sub>535</sub> trace, and EIC of the potential product prodiginine **16ef** (m/z 394.0) and the educts pyrrole **4a** (m/z 152.0) and MBC **3f** (m/z 261.0)] from a representative methanolic reaction extract of the PigC-catalysed condensation reaction between pyrrole **4a** and MBC **3f**. The structures of starting materials and the expected condensation product are shown on the left-hand site besides the corresponding EIC. Retention time of prodiginine **16fa**  $t_R$  8.06 min.

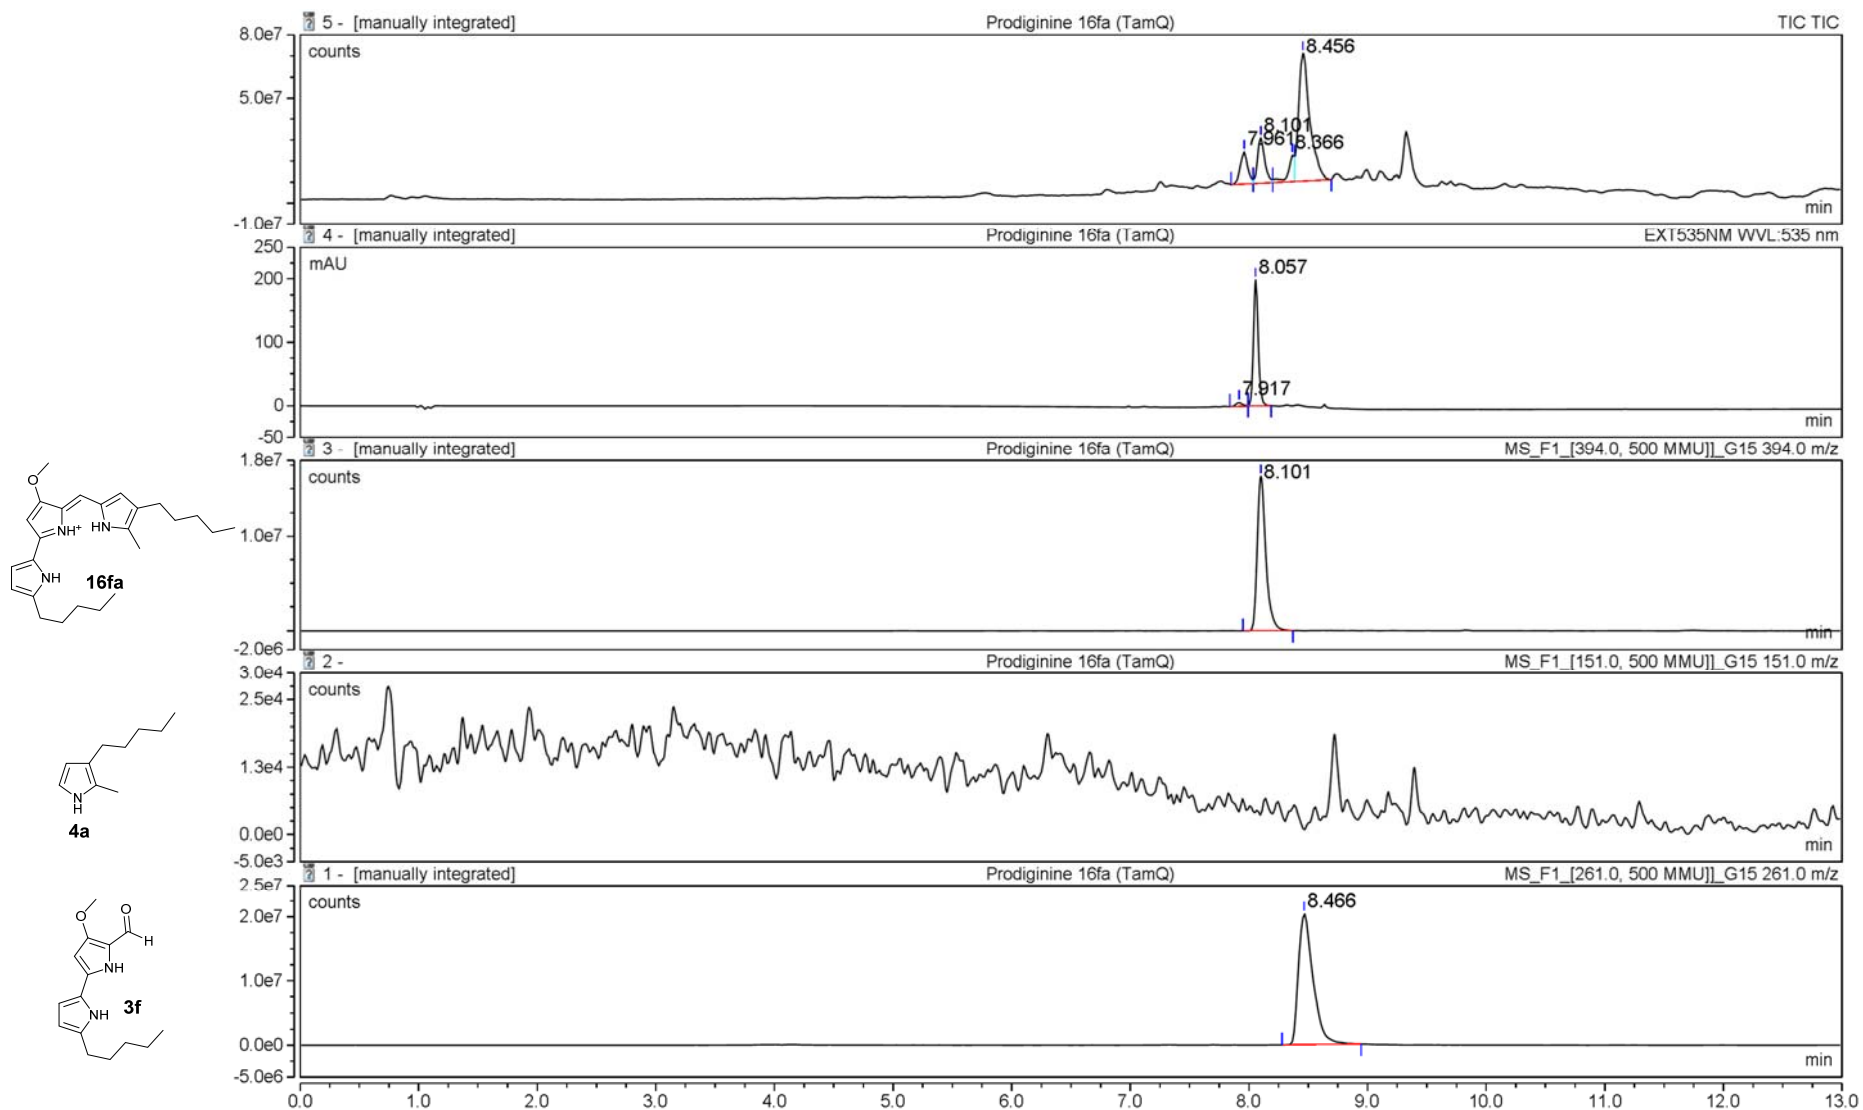

**Figure S45:** LC-MS data [from top to bottom: TIC, UV<sub>535</sub> trace, and EIC of the potential product prodiginine **16ef** ( $m/z$  394.0) and the educts pyrrole **4a** ( $m/z$  152.0) and MBC **3f** ( $m/z$  261.0)] from a representative methanolic reaction extract of the TamQ-catalysed condensation reaction between pyrrole **4a** and MBC **3f**. The structures of starting materials and the expected condensation product are shown on the left-hand site besides the corresponding EIC. Retention time of prodiginine **16fa**  $t_R$  8.06 min.

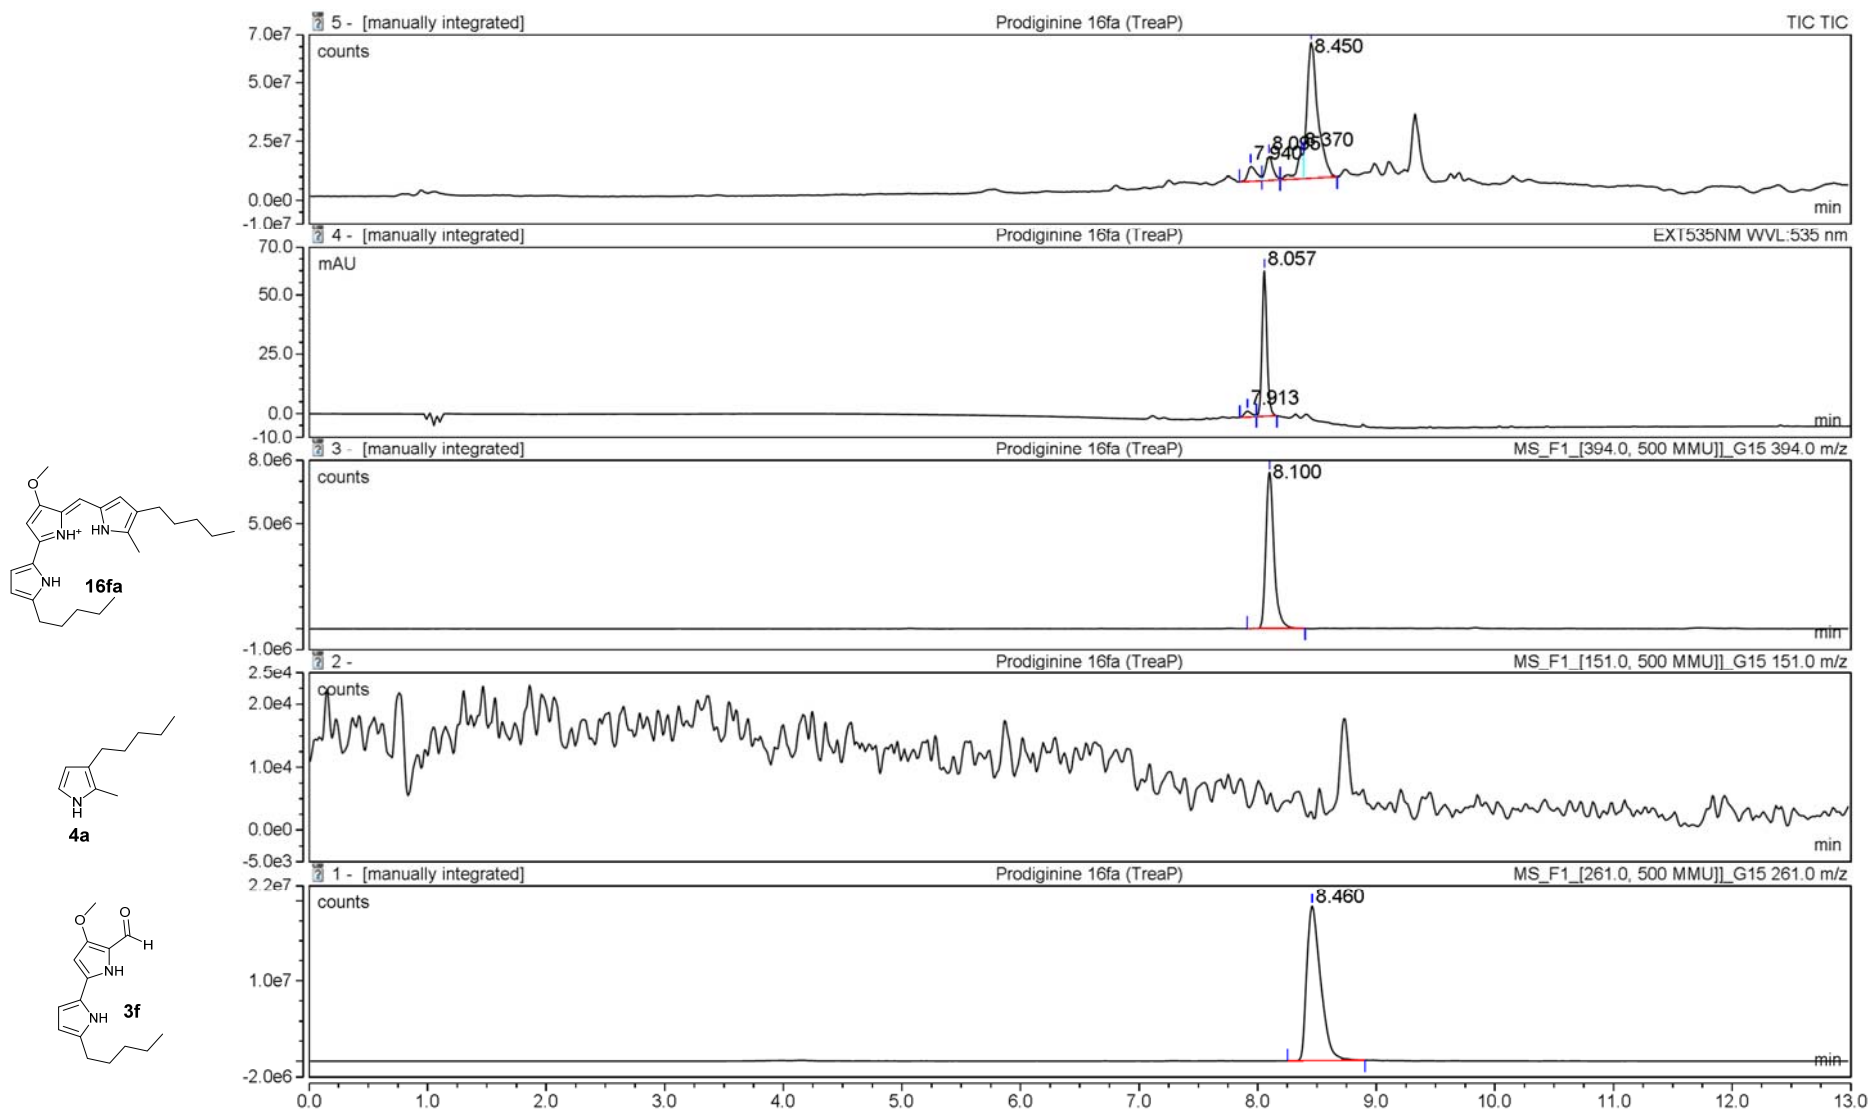

**Figure S46:** LC-MS data [from top to bottom: TIC, UV<sub>535</sub> trace, and EIC of the potential product prodiginine **16fa** (m/z 394.0) and the educts pyrrole **4a** (m/z 151.0) and MBC **3f** (m/z 261.0)] from a representative methanolic reaction extract of the TreaP-catalysed condensation reaction between pyrrole **4a** and MBC **3f**. The structures of starting materials and the expected condensation product are shown on the left-hand site besides the corresponding EIC. Retention time of prodiginine **16fa**  $t_R$  8.05 min.



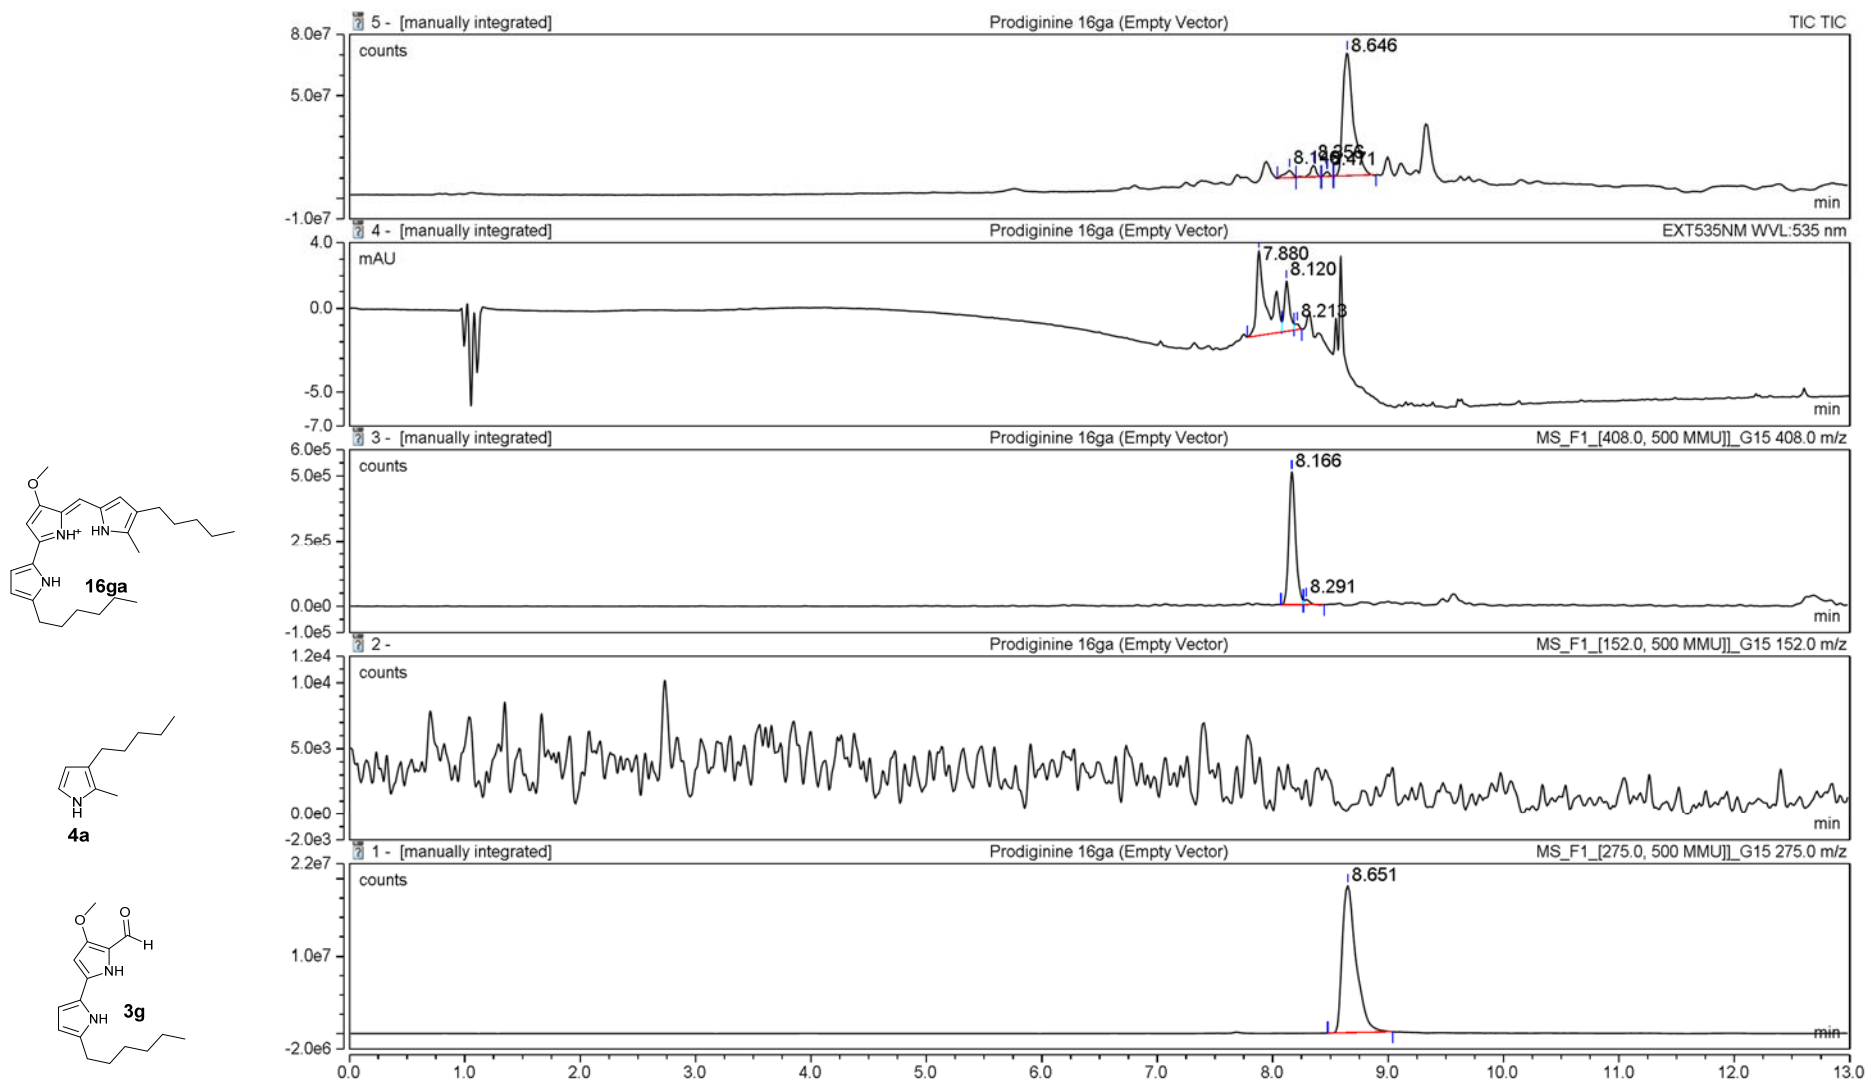

**Figure S47:** LC-MS data [from top to bottom: TIC, UV<sub>535</sub> trace, and extracted ion chromatograms (EIC) of the potential product prodigiosin **16ga** (m/z 408.0) and the educts pyrrole **4a** (m/z 152.0) and MBC **3a** (m/z 275.0)] from a representative methanolic reaction extract of the biocatalytic empty vector control reaction between pyrrole **4a** and MBC **3g**. The structures of starting materials and the expected condensation product are shown on the left-hand site besides the corresponding EIC. The small amount of prodigiosin **16ga** found in the EIC (middle chromatogram) can be traced back to acid-catalysed condensation between pyrrole and MBC during chromatography with 0.1% formic acid. Integration of the corresponding signal from the UV<sub>535</sub> trace gives an integral of 0 mAU·min.

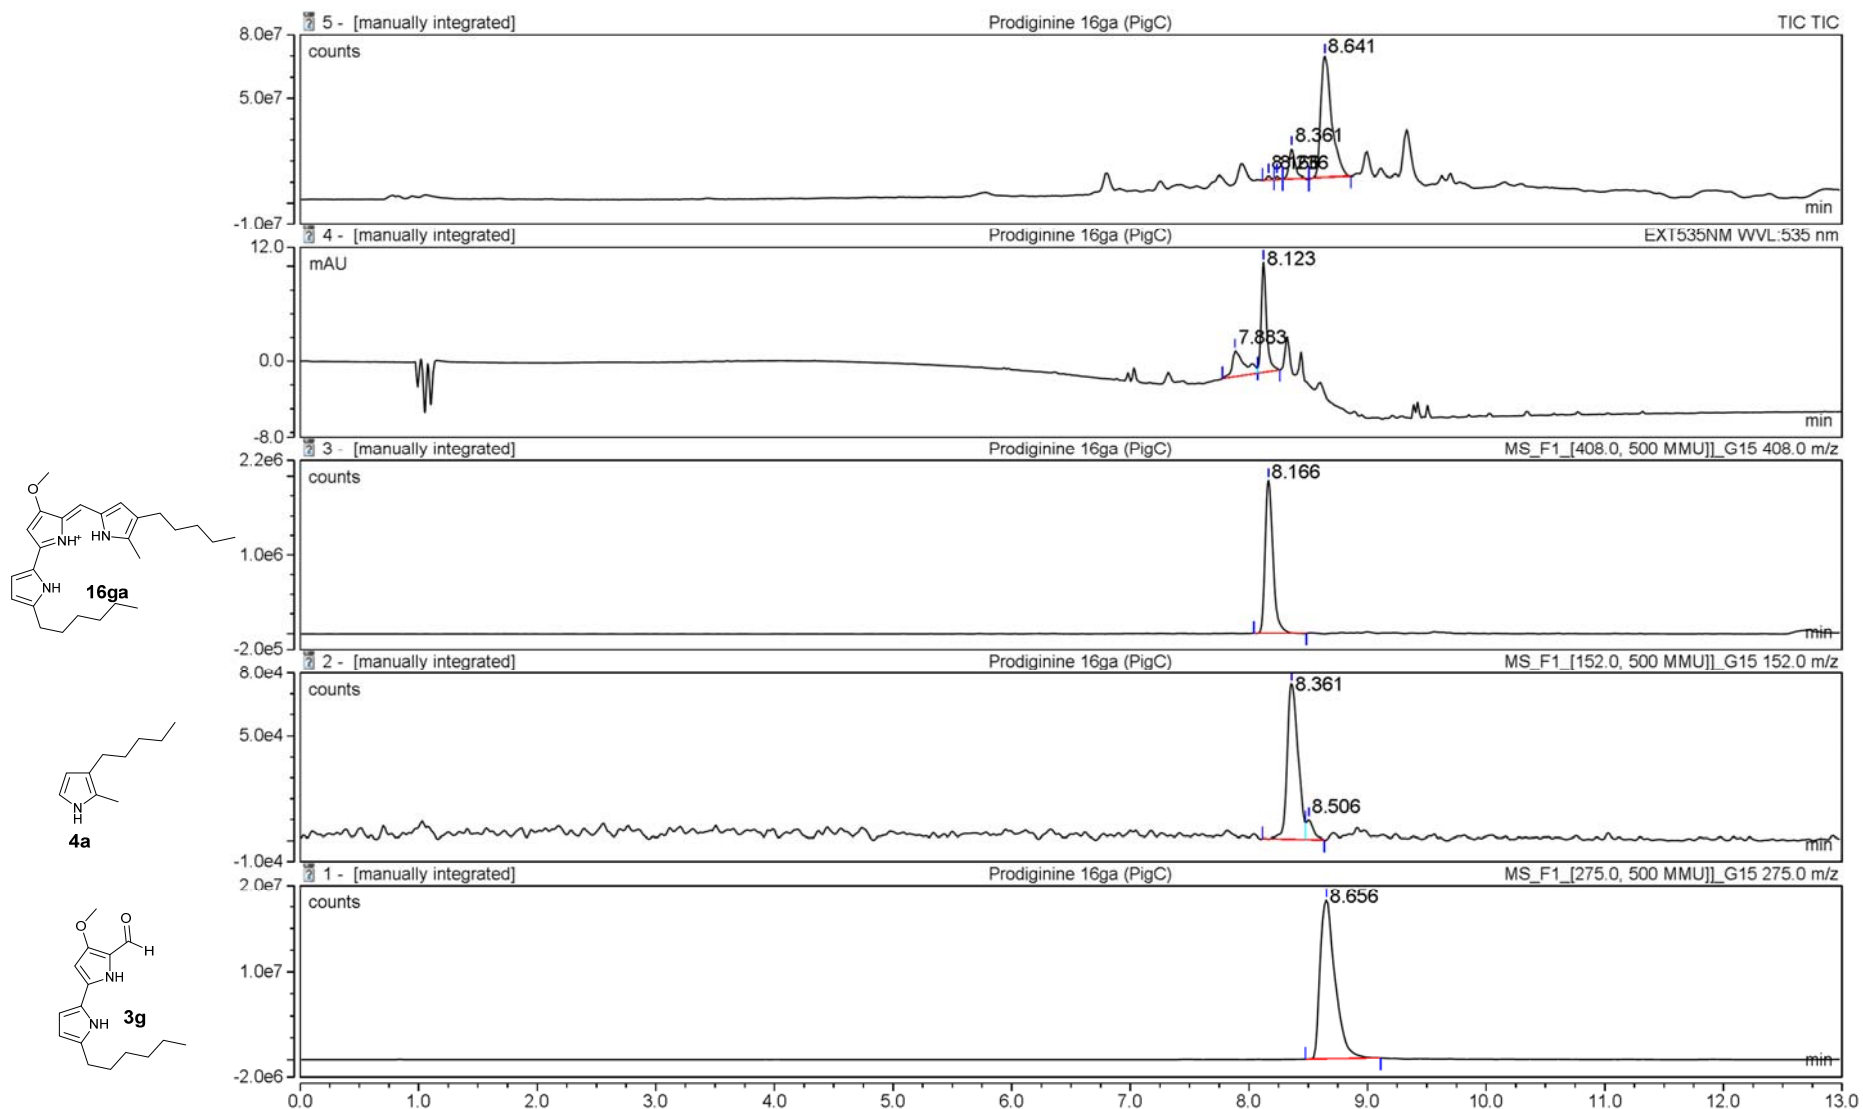

**Figure S48:** LC-MS data [from top to bottom: TIC, UV<sub>535</sub> trace, and EIC of the potential product prodiginine **16ga** (m/z 408.0) and the educts pyrrole **4a** (m/z 152.0) and MBC **3g** (m/z 275.0)] from a representative methanolic reaction extract of the PigC-catalysed condensation reaction between pyrrole **4a** and MBC **3g**. The structures of starting materials and the expected condensation product are shown on the left-hand site besides the corresponding EIC. Retention time of prodiginine **16ga**  $t_R$  8.12 min.

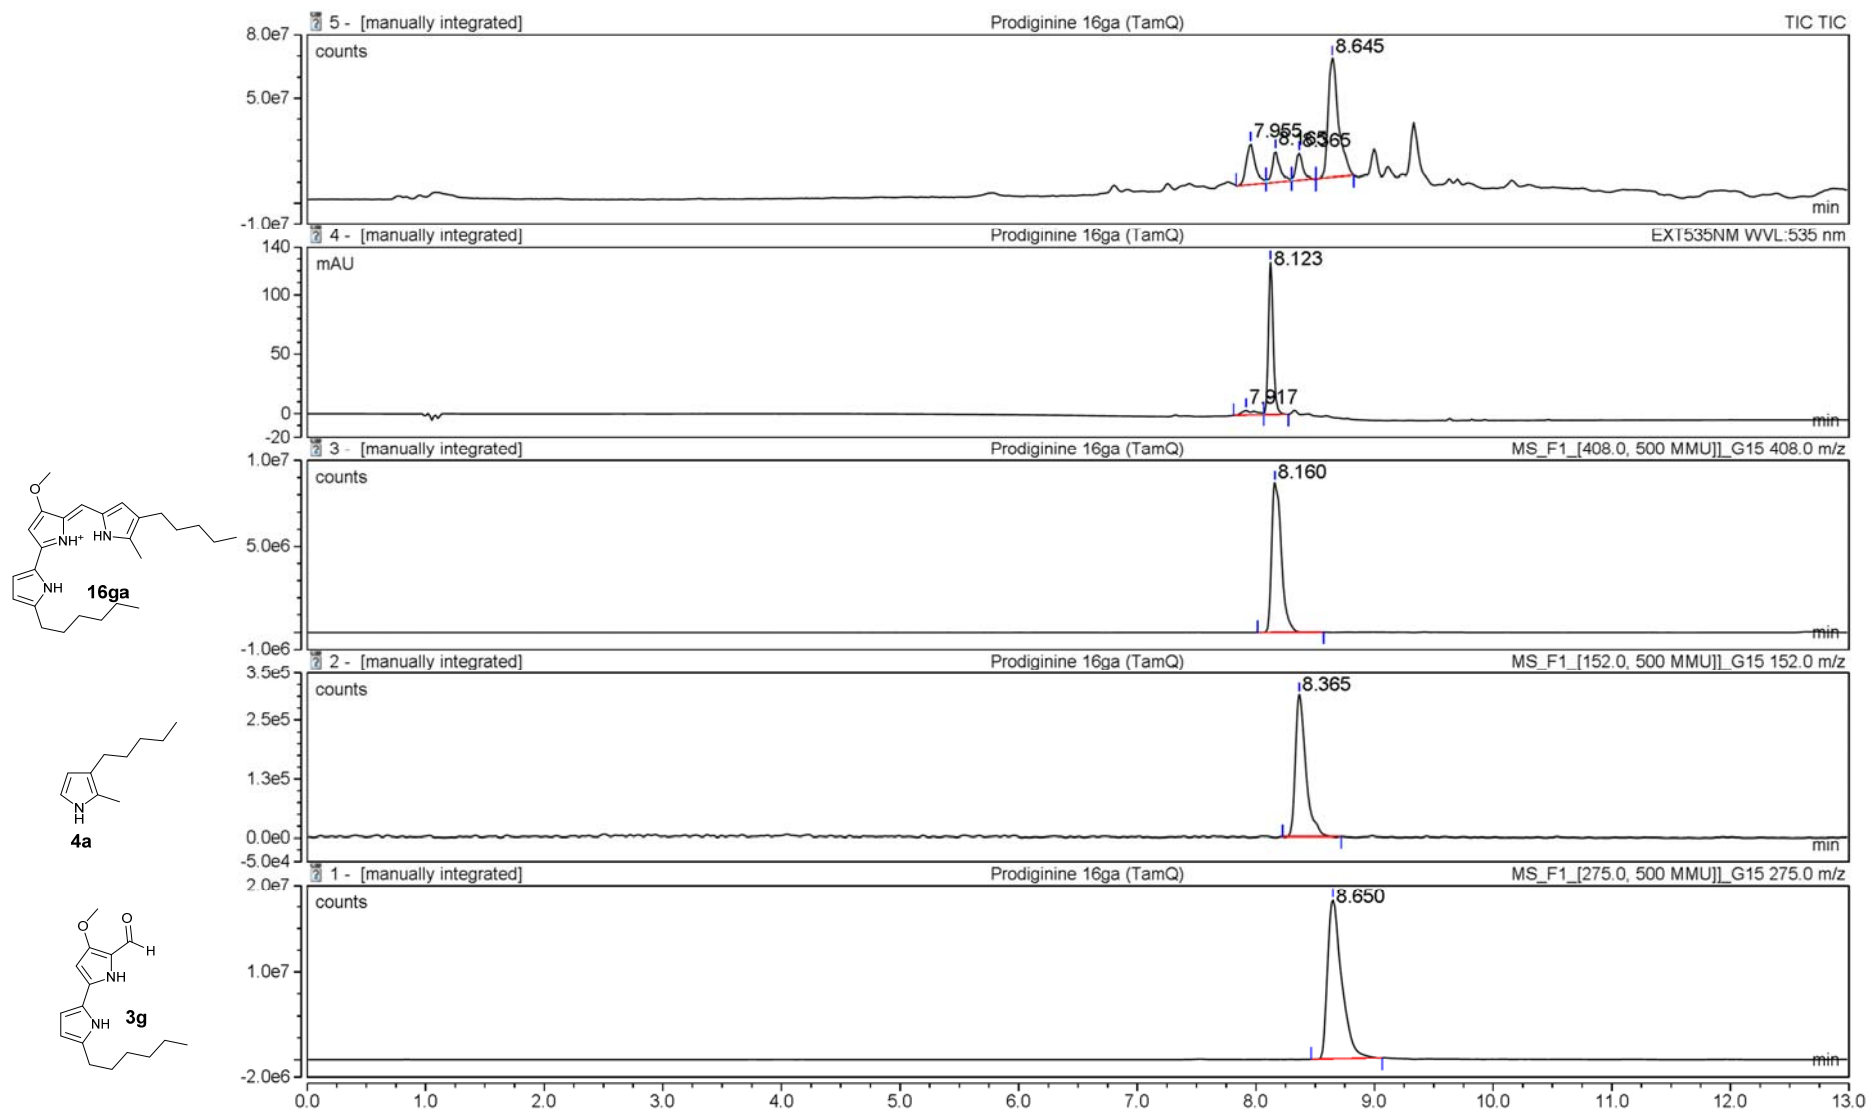

**Figure S49:** LC-MS data [from top to bottom: TIC, UV<sub>535</sub> trace, and EIC of the potential product prodiginine **16ga** ( $m/z$  408.0) and the educts pyrrole **4a** ( $m/z$  152.0) and MBC **3g** ( $m/z$  275.0)] from a representative methanolic reaction extract of the TamQ-catalysed condensation reaction between pyrrole **4a** and MBC **3g**. The structures of starting materials and the expected condensation product are shown on the left-hand site besides the corresponding EIC. Retention time of prodiginine **16ga**  $t_R$  8.12 min.

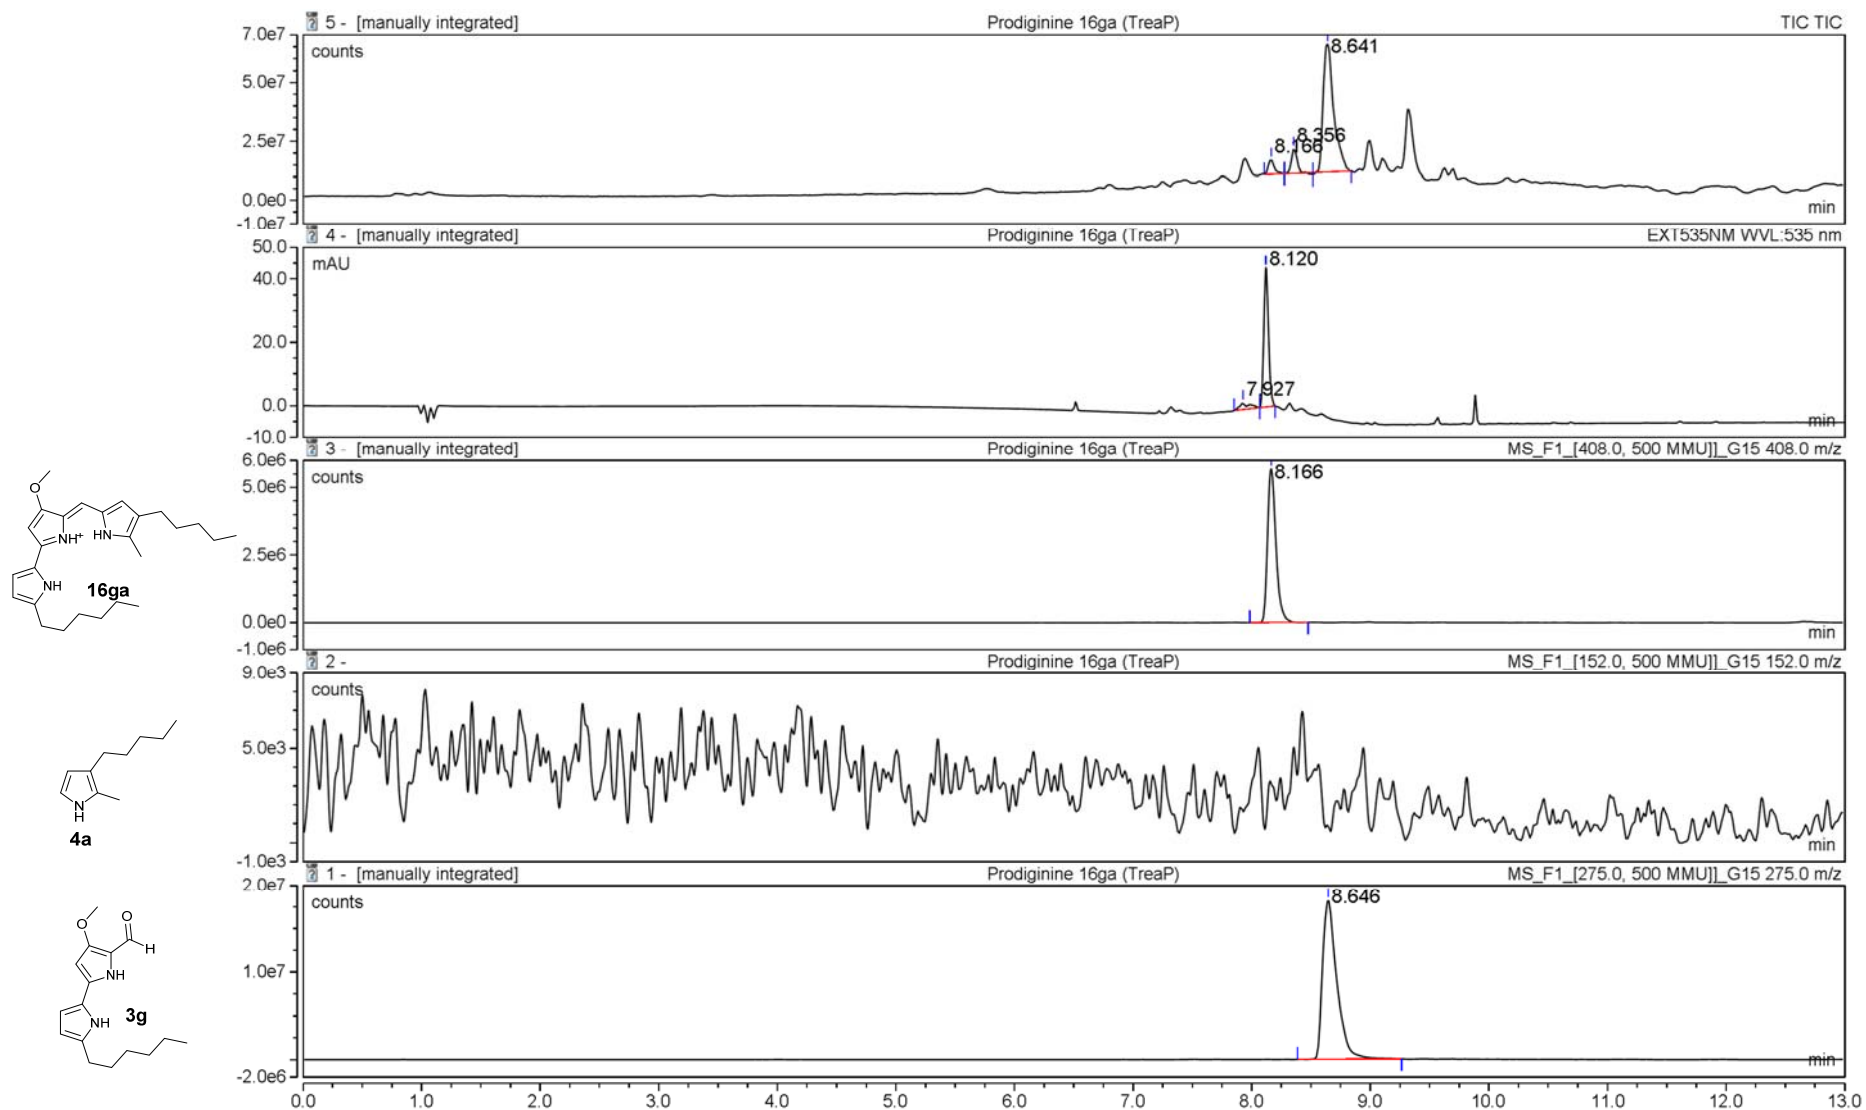

**Figure S50:** LC-MS data [from top to bottom: TIC, UV<sub>535</sub> trace, and EIC of the potential product prodiginine **16ga** (m/z 408.0) and the educts pyrrole **4a** (m/z 152.0) and MBC **3g** (m/z 275.0)] from a representative methanolic reaction extract of the TreaP-catalysed condensation reaction between pyrrole **4a** and MBC **3g**. The structures of starting materials and the expected condensation product are shown on the left-hand site besides the corresponding EIC. Retention time of prodiginine **16ga**  $t_R$  8.12 min.

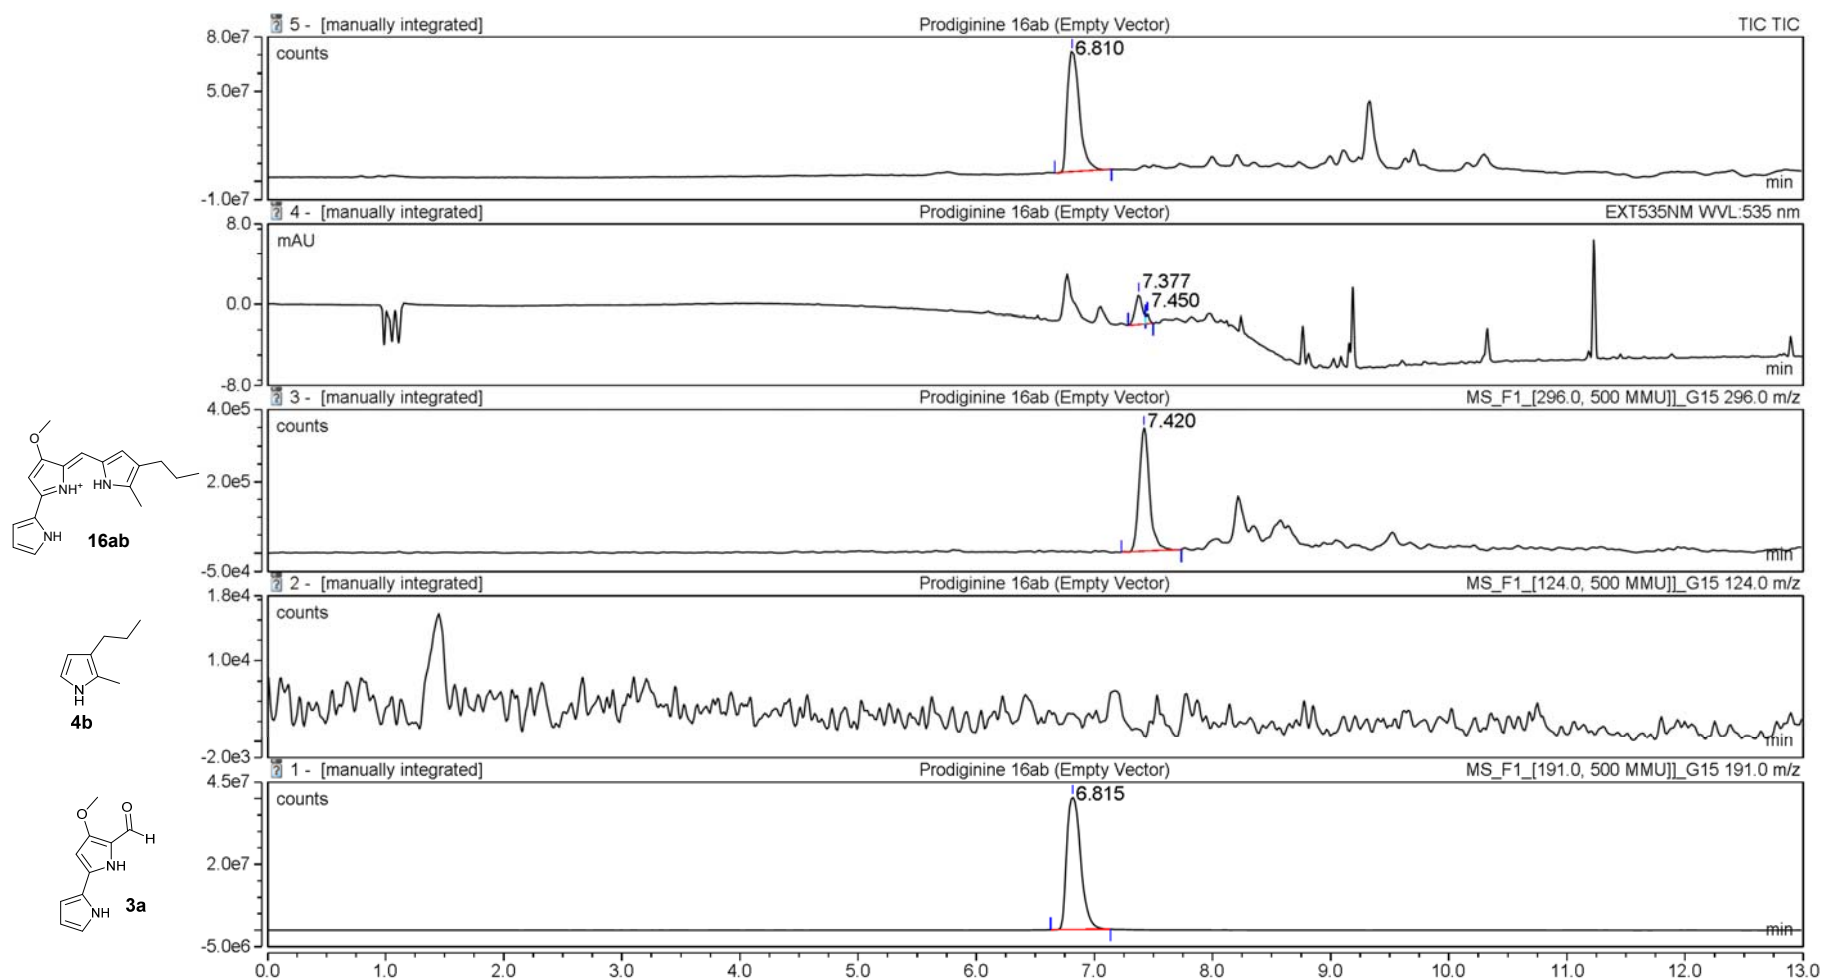

**Figure S51:** LC-MS data [from top to bottom: TIC, UV<sub>535</sub> trace, and extracted ion chromatograms (EIC) of the potential product prodigiosin **16ab** (m/z 296.0) and the educts pyrrole **4b** (m/z 124.0) and MBC **3a** (m/z 191.0)] from a representative methanolic reaction extract of the biocatalytic empty vector control reaction between pyrrole **4b** and MBC **3a**. The structures of starting materials and the expected condensation product are shown on the left-hand site besides the corresponding EIC. The small amount of prodigiosin **16ab** found in the EIC (middle chromatogram) can be traced back to acid-catalysed condensation between pyrrole and MBC during chromatography with 0.1% formic acid. Integration of the corresponding signal from the UV<sub>535</sub> trace gives an integral of 0 mAU·min.

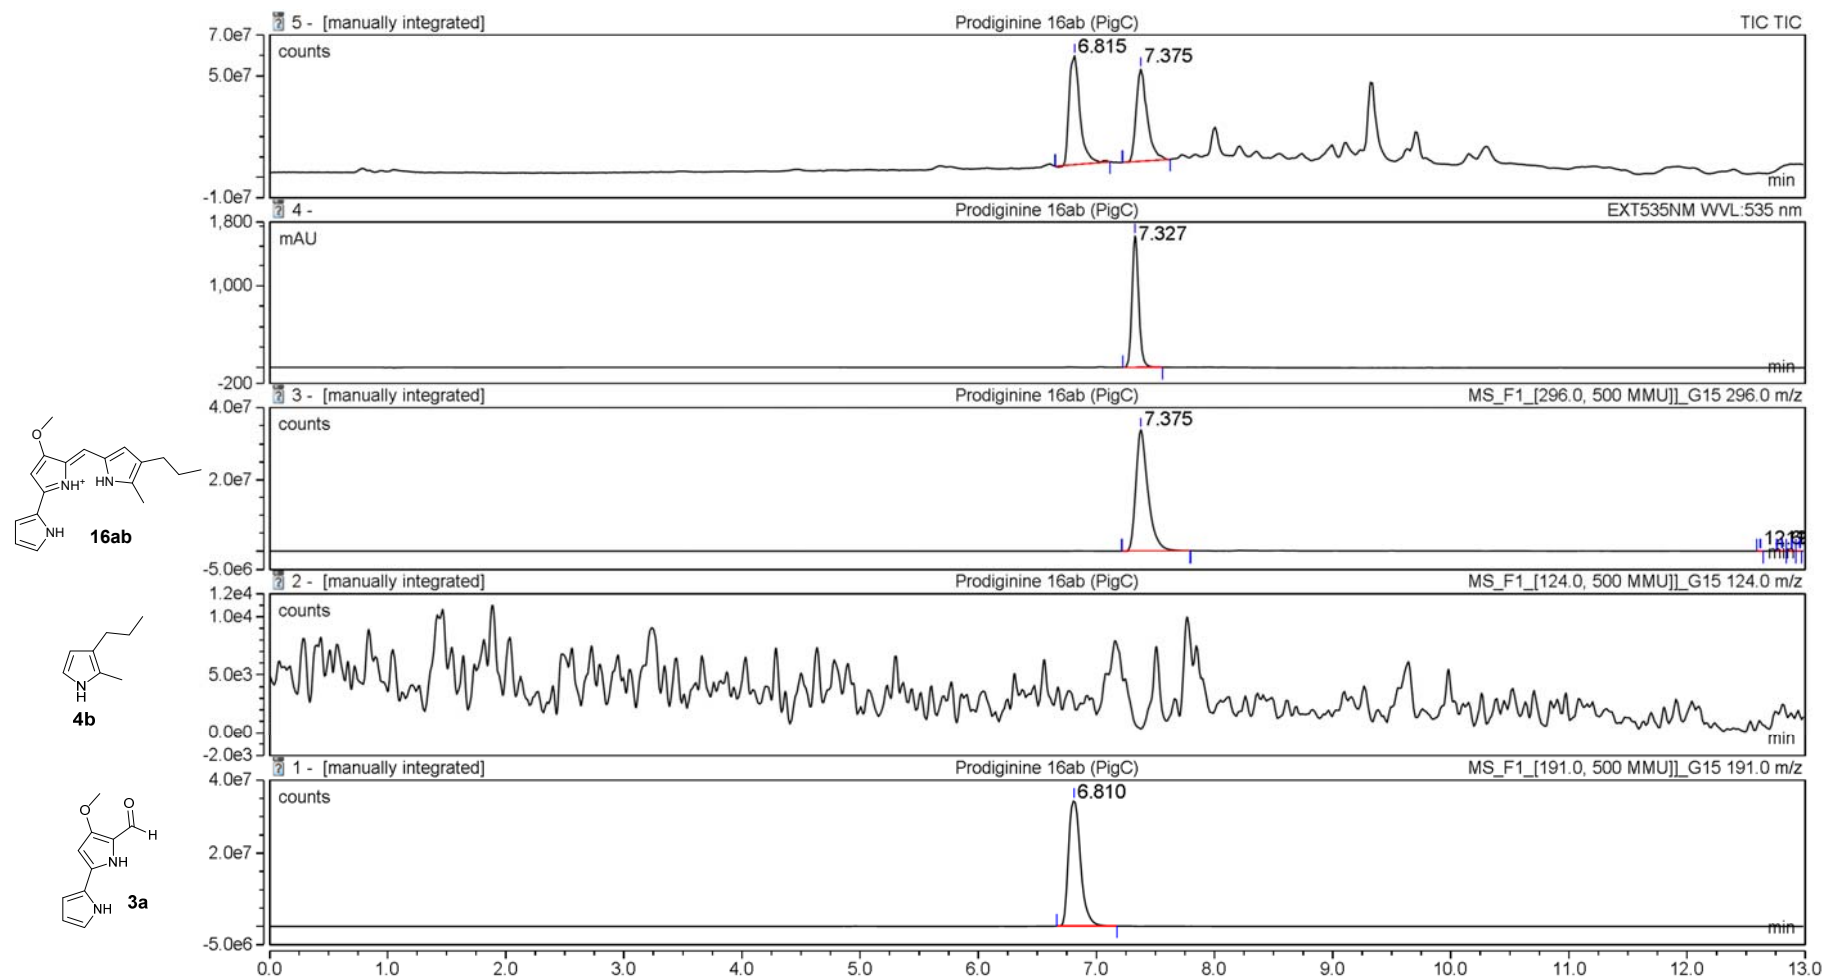

**Figure S52:** LC-MS data [from top to bottom: TIC, UV<sub>535</sub> trace, and EIC of the potential product prodiginine **16ab** (m/z 296.0) and the educts pyrrole **4b** (m/z 124.0) and MBC **3a** (m/z 191.0)] from a representative methanolic reaction extract of the PigC-catalysed condensation reaction between pyrrole **4b** and MBC **3a**. The structures of starting materials and the expected condensation product are shown on the left-hand site besides the corresponding EIC. Retention time of prodiginine **16ab**  $t_R$  7.33 min.

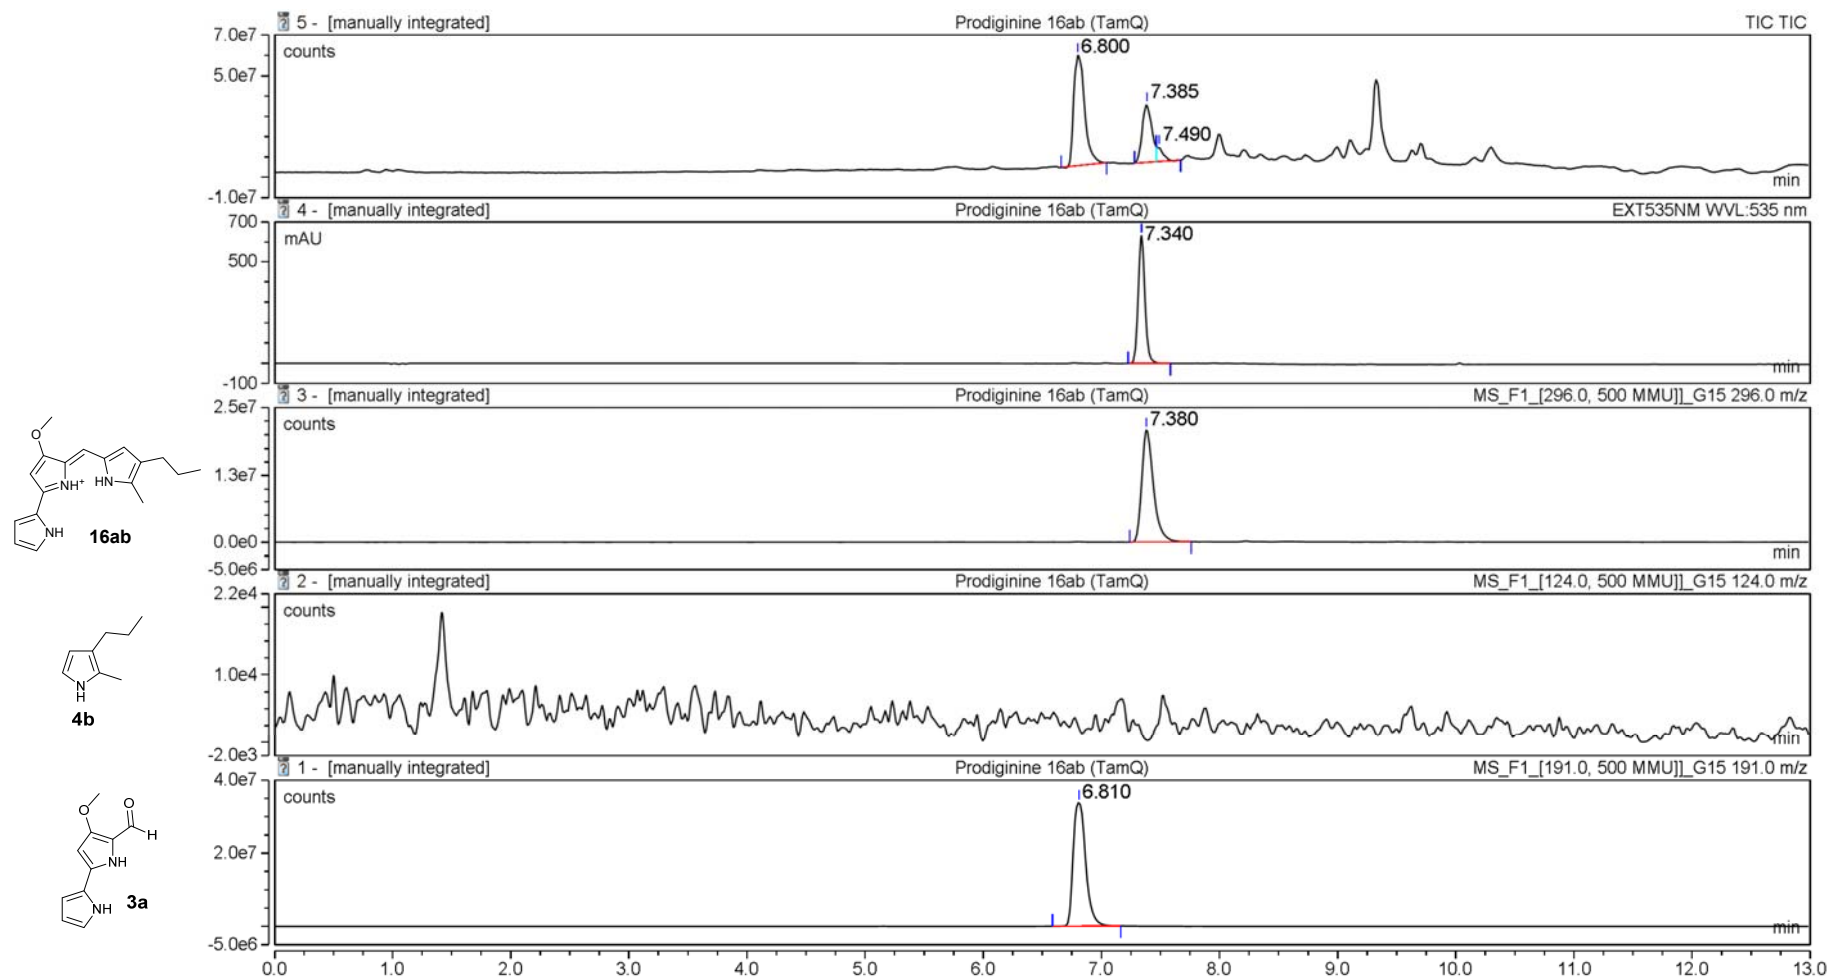

**Figure S53:** LC-MS data [from top to bottom: TIC, UV<sub>535</sub> trace, and EIC of the potential product prodiginine **16ab** (m/z 296.0) and the educts pyrrole **4b** (m/z 124.0) and MBC **3a** (m/z 191.0)] from a representative methanolic reaction extract of the TamQ-catalysed condensation reaction between pyrrole **4b** and MBC **3a**. The structures of starting materials and the expected condensation product are shown on the left-hand site besides the corresponding EIC. Retention time of prodiginine **16ab**  $t_R$  7.34 min.

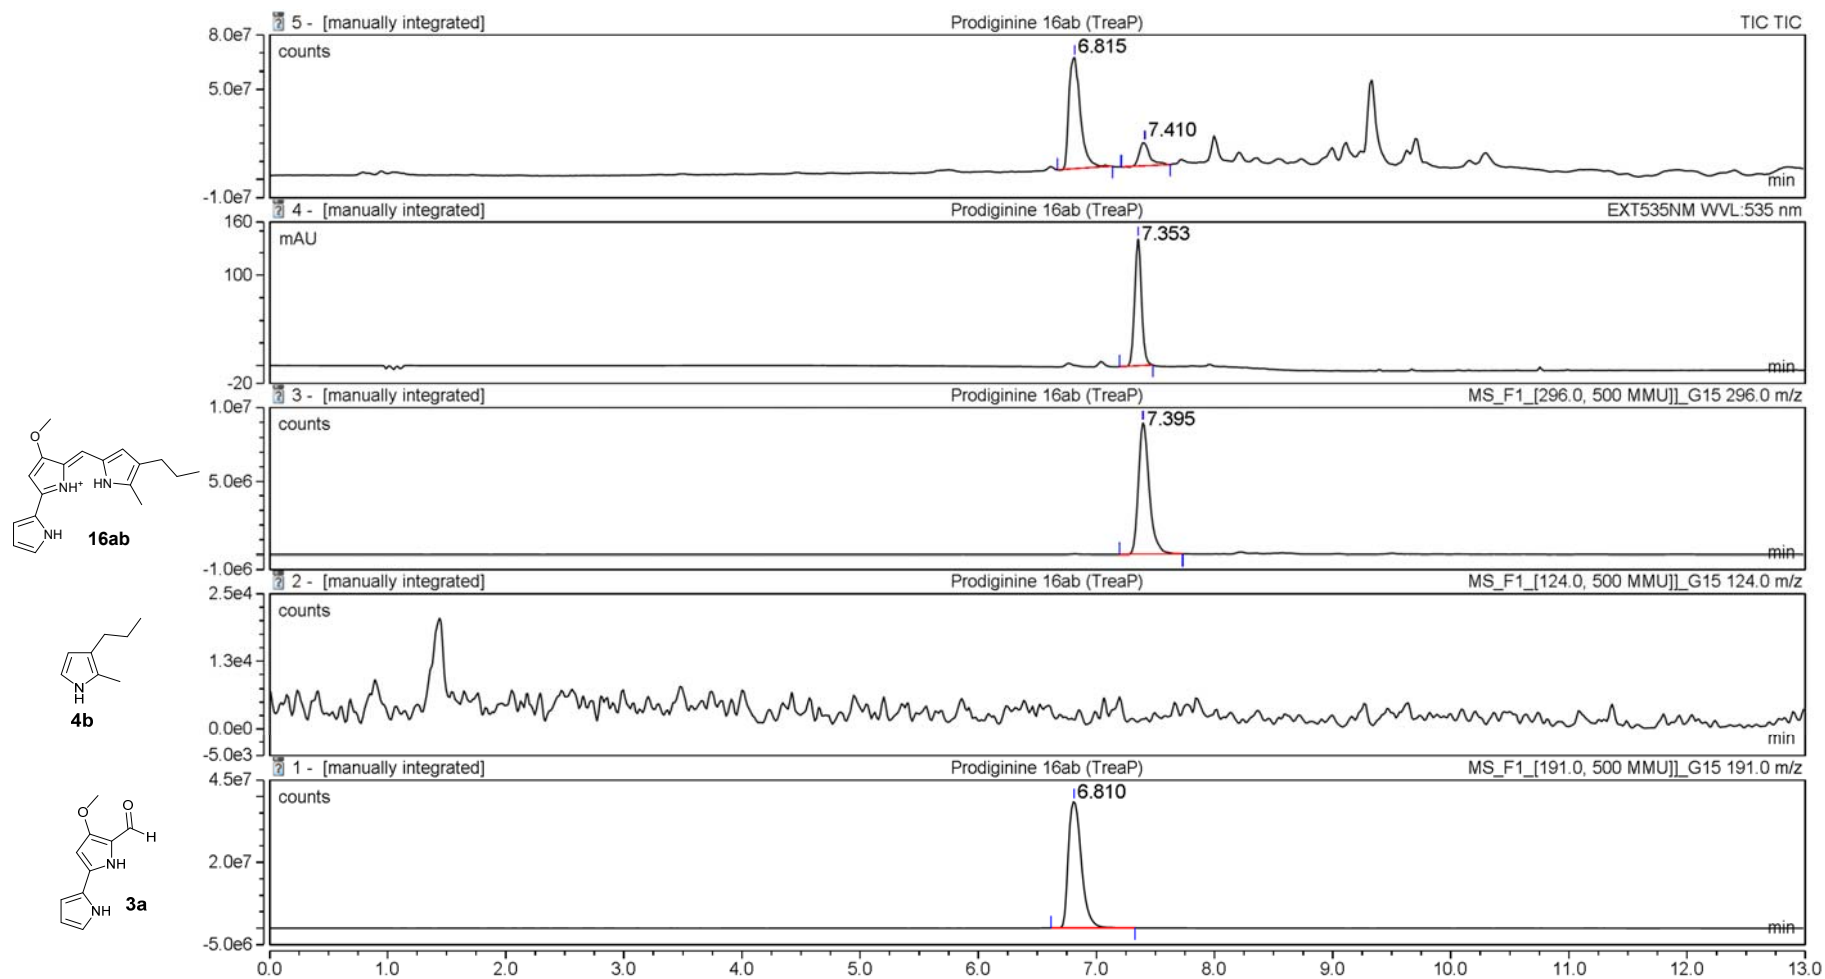

**Figure S54:** LC-MS data [from top to bottom: TIC, UV<sub>535</sub> trace, and EIC of the potential product prodiginine **16ab** (m/z 296.0) and the educts pyrrole **4b** (m/z 124.0) and MBC **3a** (m/z 191.0)] from a representative methanolic reaction extract of the TreaP-catalysed condensation reaction between pyrrole **4b** and MBC **3a**. The structures of starting materials and the expected condensation product are shown on the left-hand site besides the corresponding EIC. Retention time of prodiginine **16ab**  $t_R$  7.35 min.



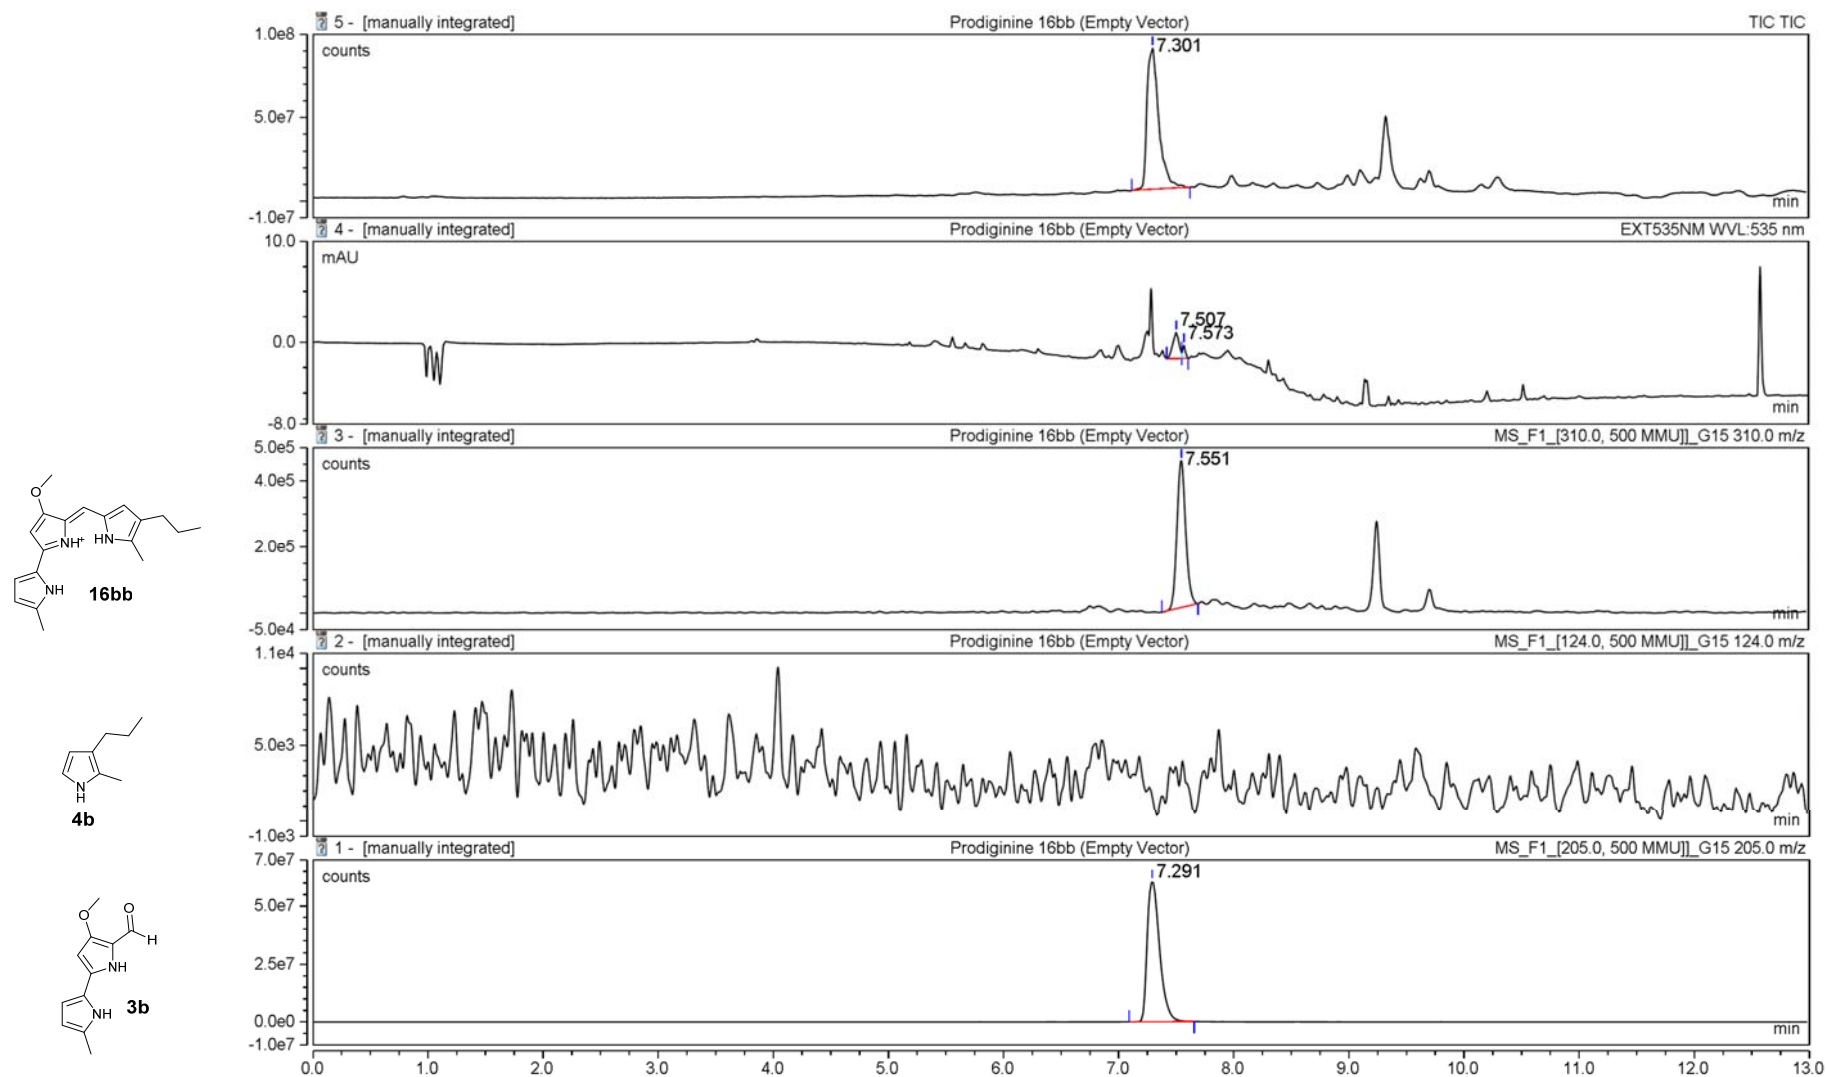

**Figure S55:** LC-MS data [from top to bottom: TIC, UV<sub>535</sub> trace, and extracted ion chromatograms (EIC) of the potential product prodigiosin **16bb** (m/z 310.0) and the educts pyrrole **4b** (m/z 124.0) and MBC **3b** (m/z 205.0)] from a representative methanolic reaction extract of the biocatalytic empty vector control reaction between pyrrole **4b** and MBC **3b**. The structures of starting materials and the expected condensation product are shown on the left-hand site besides the corresponding EIC. The small amount of prodigiosin **16bb** found in the EIC (middle chromatogram) can be traced back to acid-catalysed condensation between pyrrole and MBC during chromatography with 0.1% formic acid. Integration of the corresponding signal from the UV<sub>535</sub> trace gives an integral of 0 mAU·min.

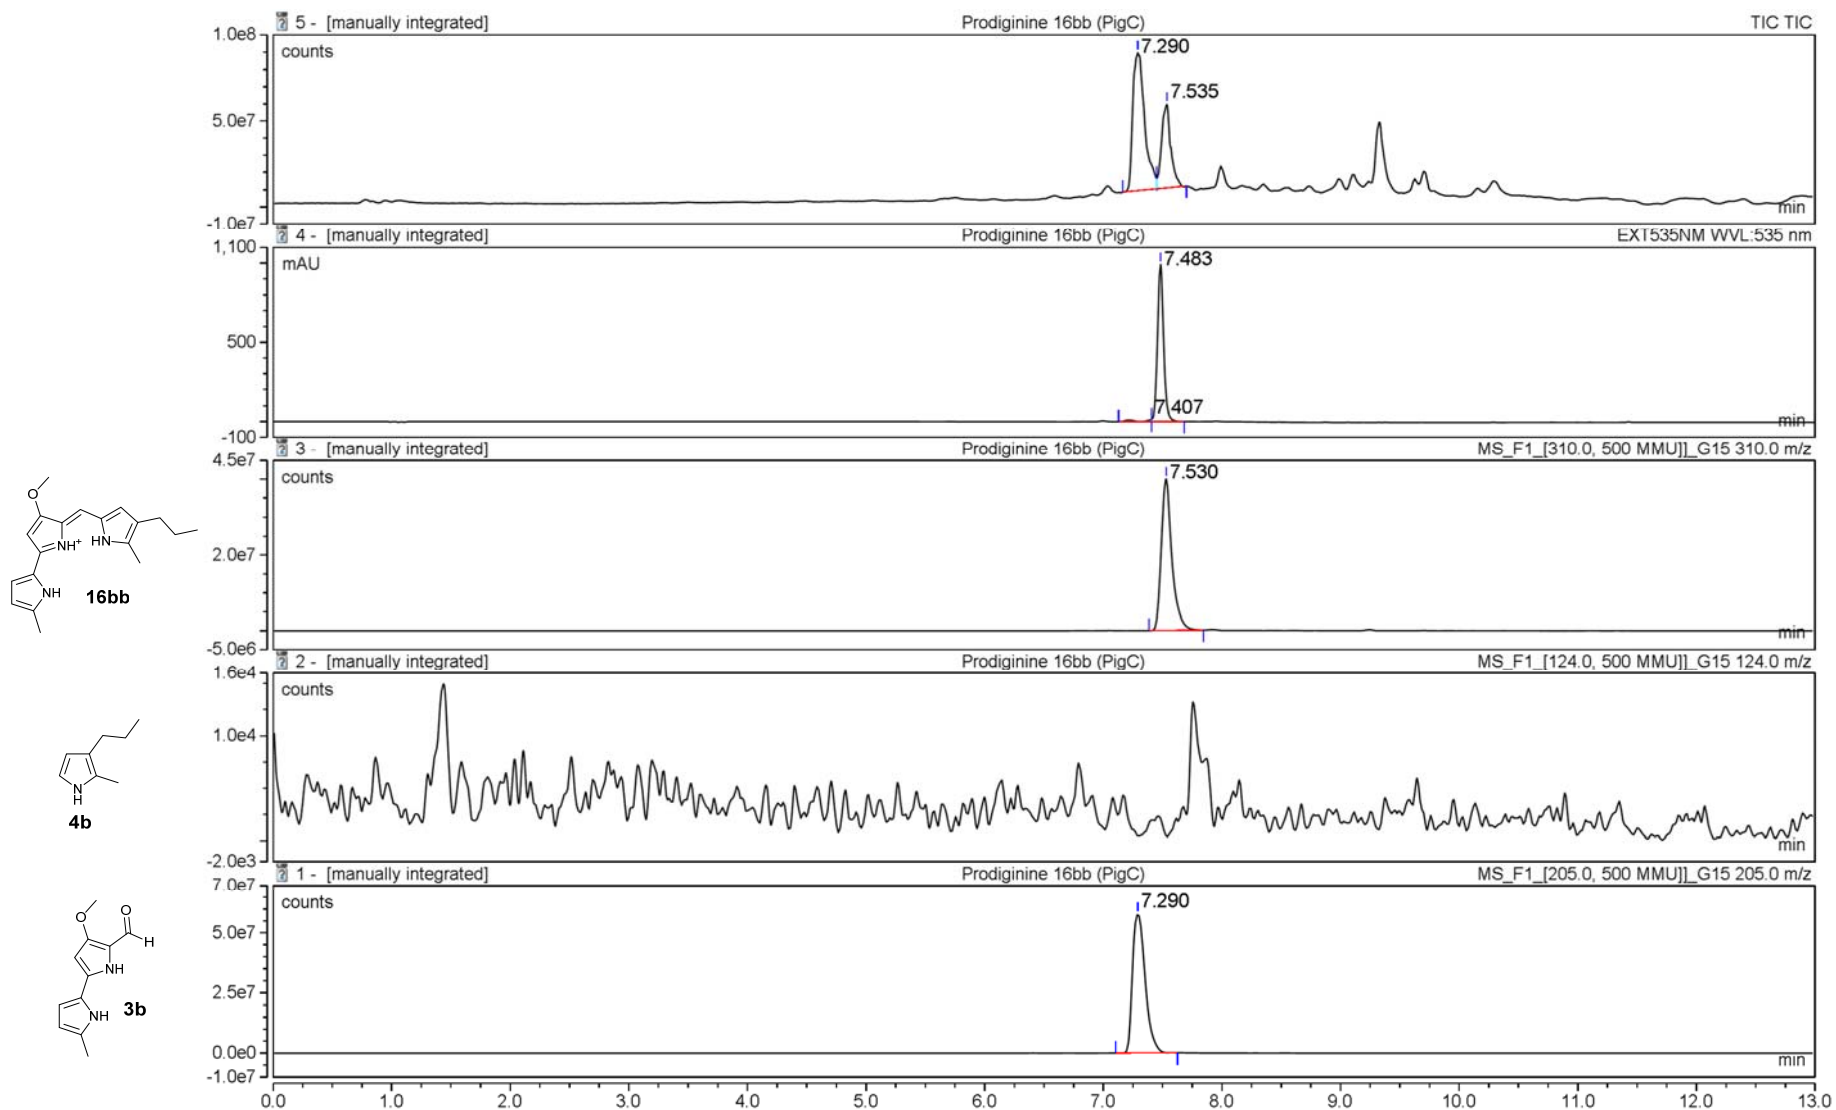

**Figure S56:** LC-MS data [from top to bottom: TIC, UV<sub>535</sub> trace, and EIC of the potential product prodiginine **16bb** (m/z 310.0) and the educts pyrrole **4b** (m/z 124.0) and MBC **3b** (m/z 205.0)] from a representative methanolic reaction extract of the PigC-catalysed condensation reaction between pyrrole **4b** and MBC **3b**. The structures of starting materials and the expected condensation product are shown on the left-hand site besides the corresponding EIC. Retention time of prodiginine **16bb** t<sub>R</sub> 7.48 min.

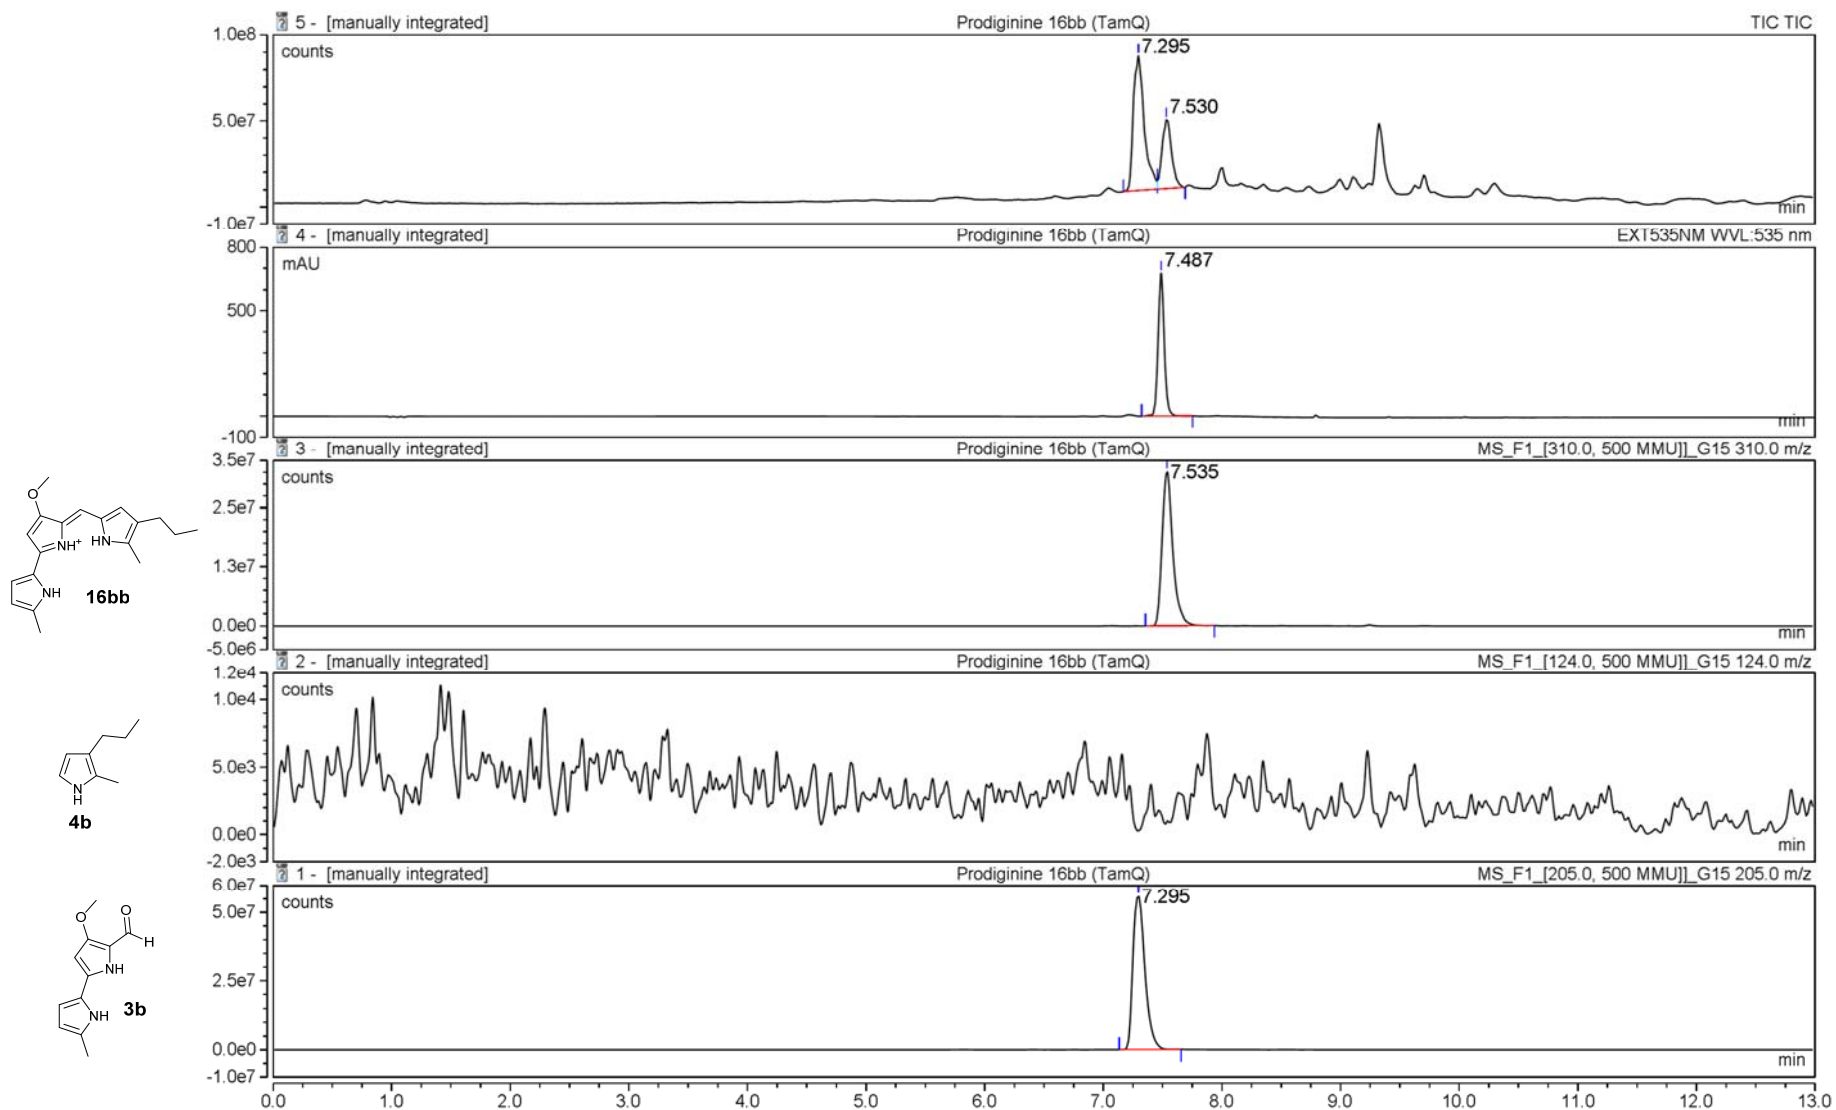

**Figure S57:** LC-MS data [from top to bottom: TIC, UV<sub>535</sub> trace, and EIC of the potential product prodiginine **16bb** (m/z 310.0) and the educts pyrrole **4b** (m/z 124.0) and MBC **3b** (m/z 205.0)] from a representative methanolic reaction extract of the TamQ-catalysed condensation reaction between pyrrole **4b** and MBC **3b**. The structures of starting materials and the expected condensation product are shown on the left-hand site besides the corresponding EIC. Retention time of prodiginine **16bb**  $t_R$  7.49 min.

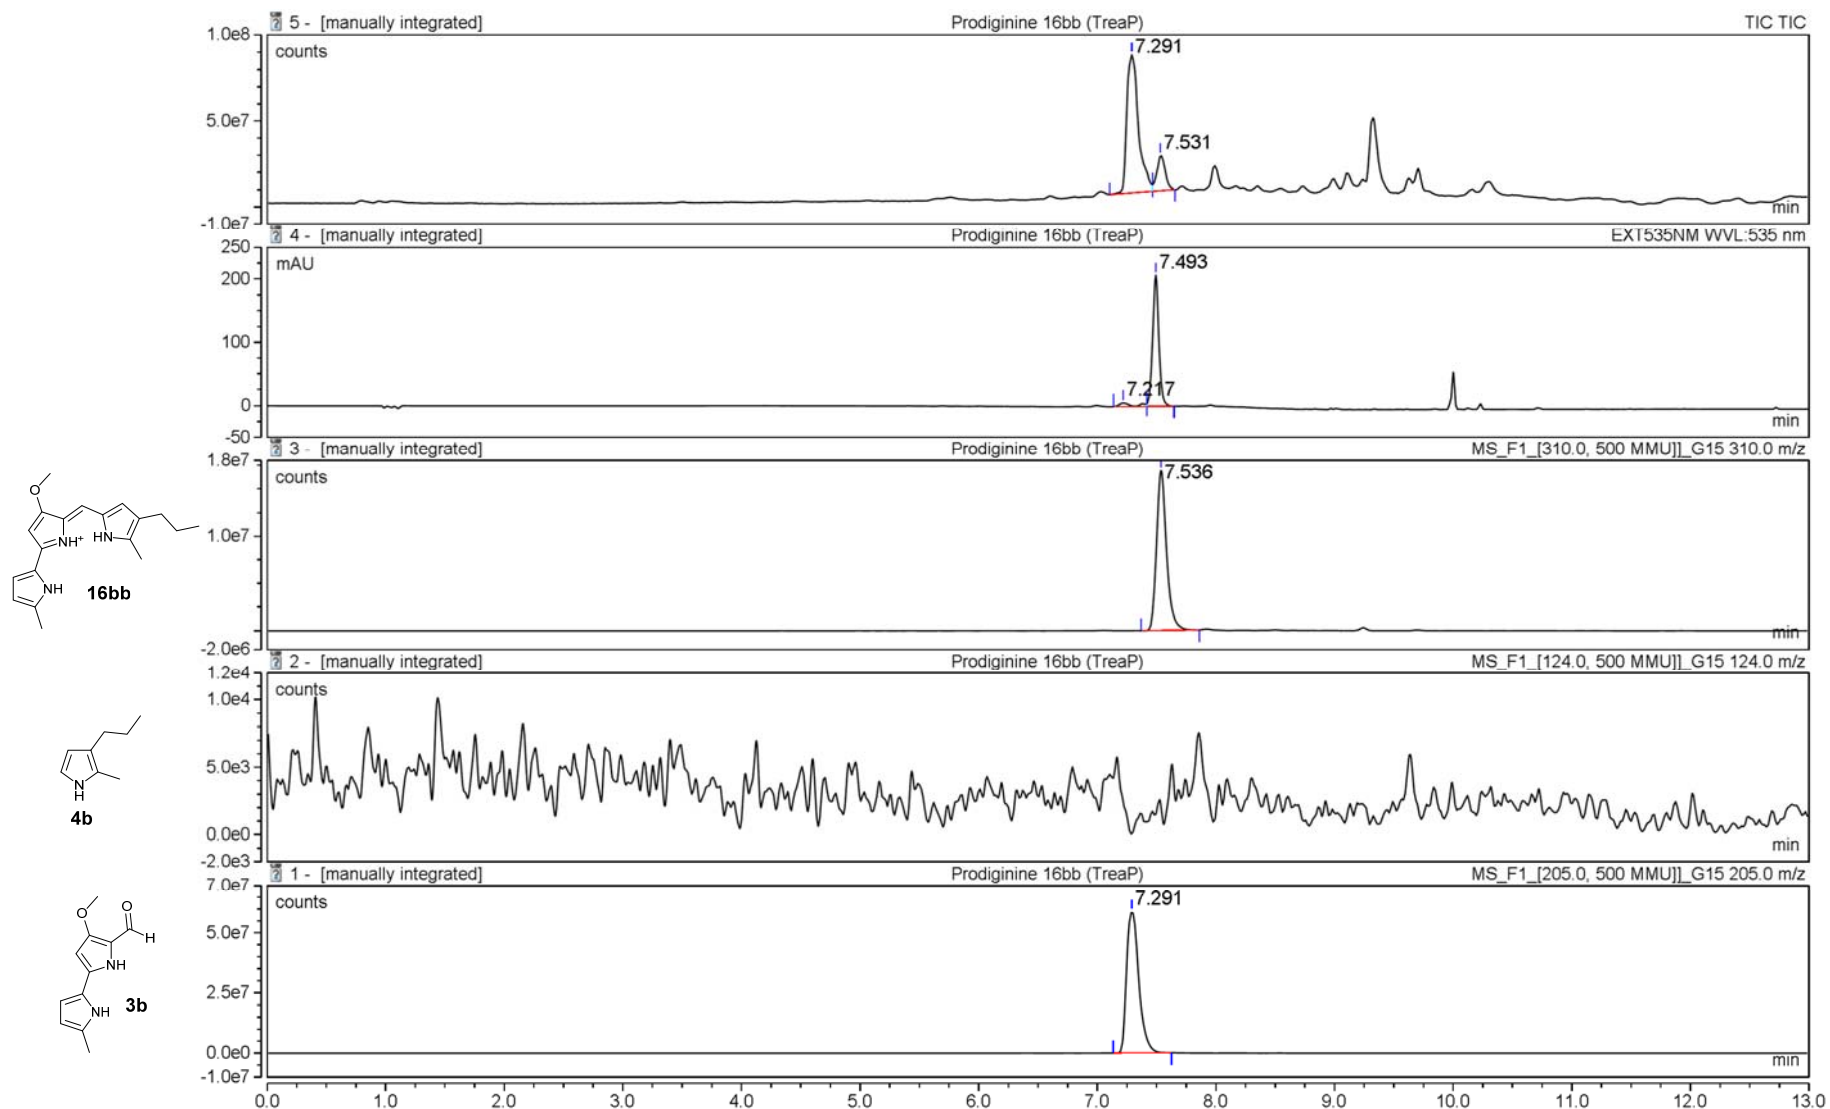

**Figure S58:** LC-MS data [from top to bottom: TIC, UV<sub>535</sub> trace, and EIC of the potential product prodiginine **16bb** (m/z 310.0) and the educts pyrrole **4b** (m/z 124.0) and MBC **3b** (m/z 205.0)] from a representative methanolic reaction extract of the TreaP-catalysed condensation reaction between pyrrole **4b** and MBC **3b**. The structures of starting materials and the expected condensation product are shown on the left-hand site besides the corresponding EIC. Retention time of prodiginine **16bb**  $t_R$  7.49 min.

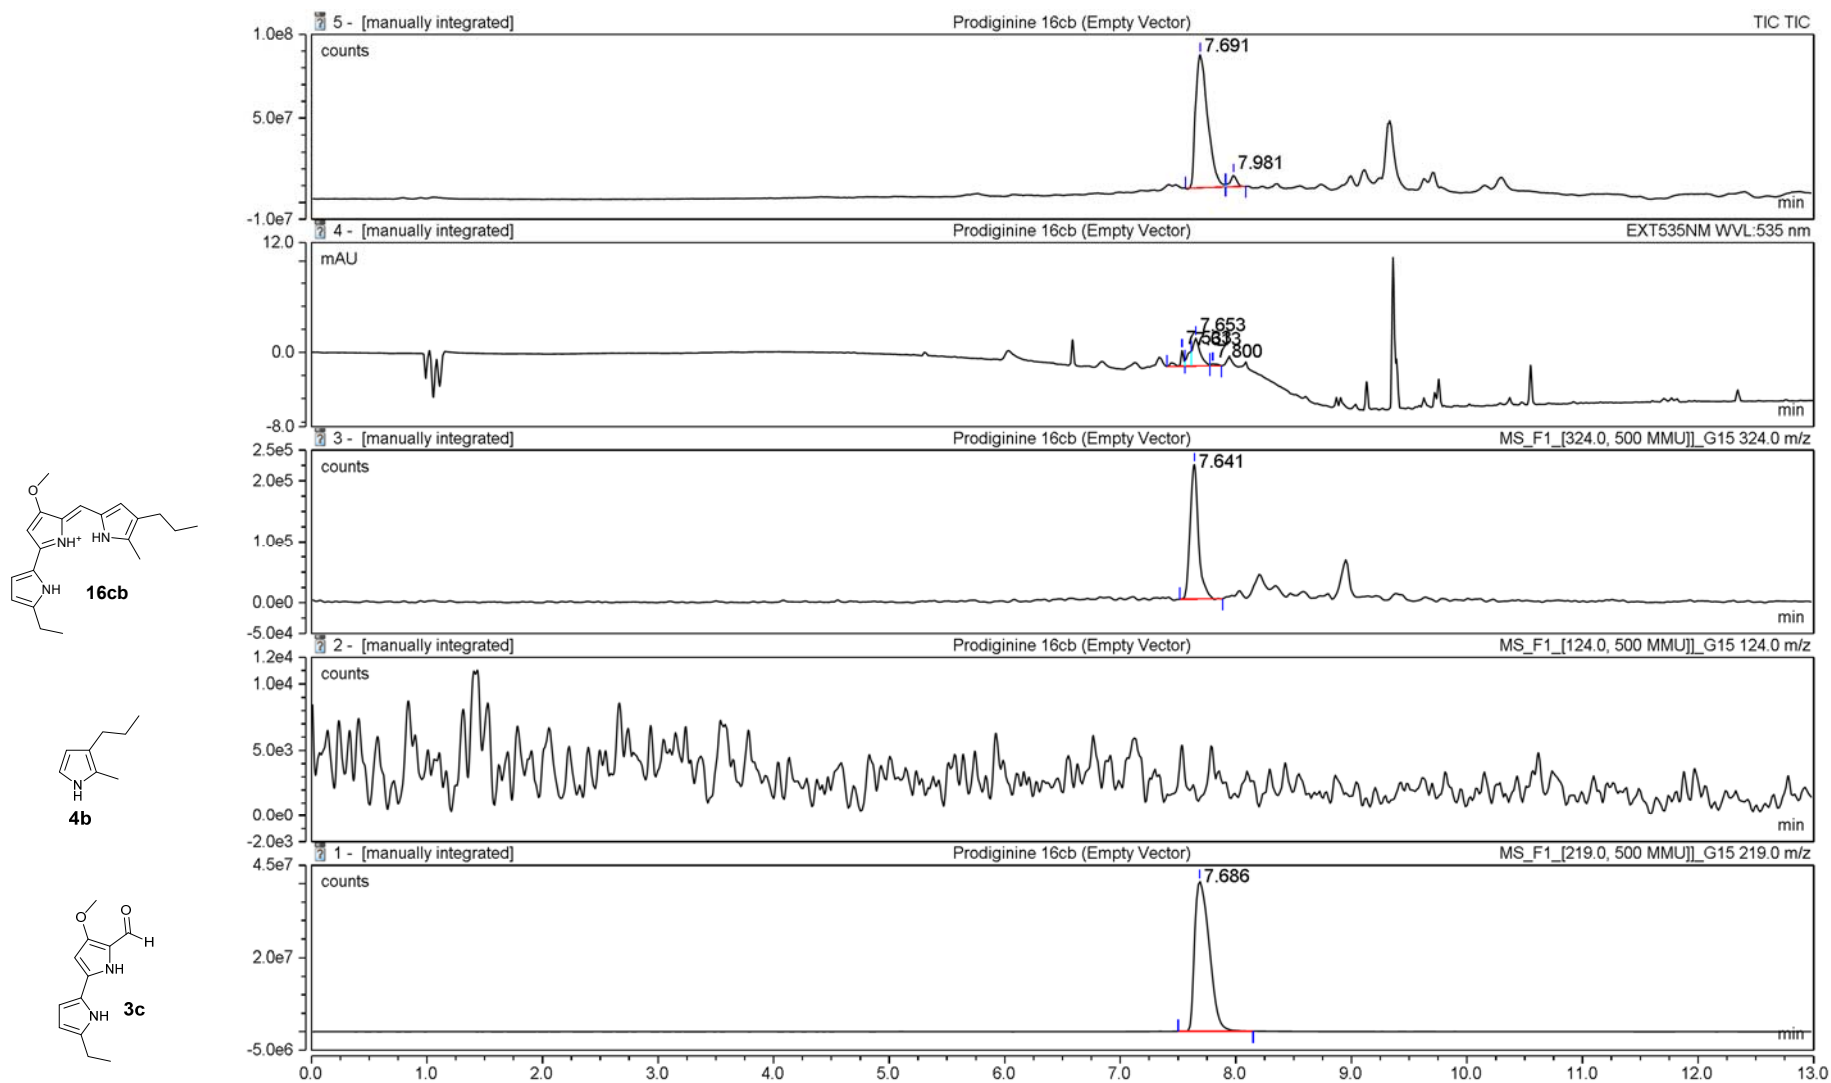

**Figure S59:** LC-MS data [from top to bottom: TIC, UV<sub>535</sub> trace, and extracted ion chromatograms (EIC) of the potential product prodiginosin **16bc** (m/z 324.0) and the educts pyrrole **4b** (m/z 124.0) and MBC **3c** (m/z 219.0)] from a representative methanolic reaction extract of the biocatalytic empty vector control reaction between pyrrole **4b** and MBC **3c**. The structures of starting materials and the expected condensation product are shown on the left-hand site besides the corresponding EIC. The small amount of prodiginosin **16bc** found in the EIC (middle chromatogram) can be traced back to acid-catalysed condensation between pyrrole and MBC during chromatography with 0.1% formic acid. Integration of the corresponding signal from the UV<sub>535</sub> trace gives an integral of 0 mAU·min.

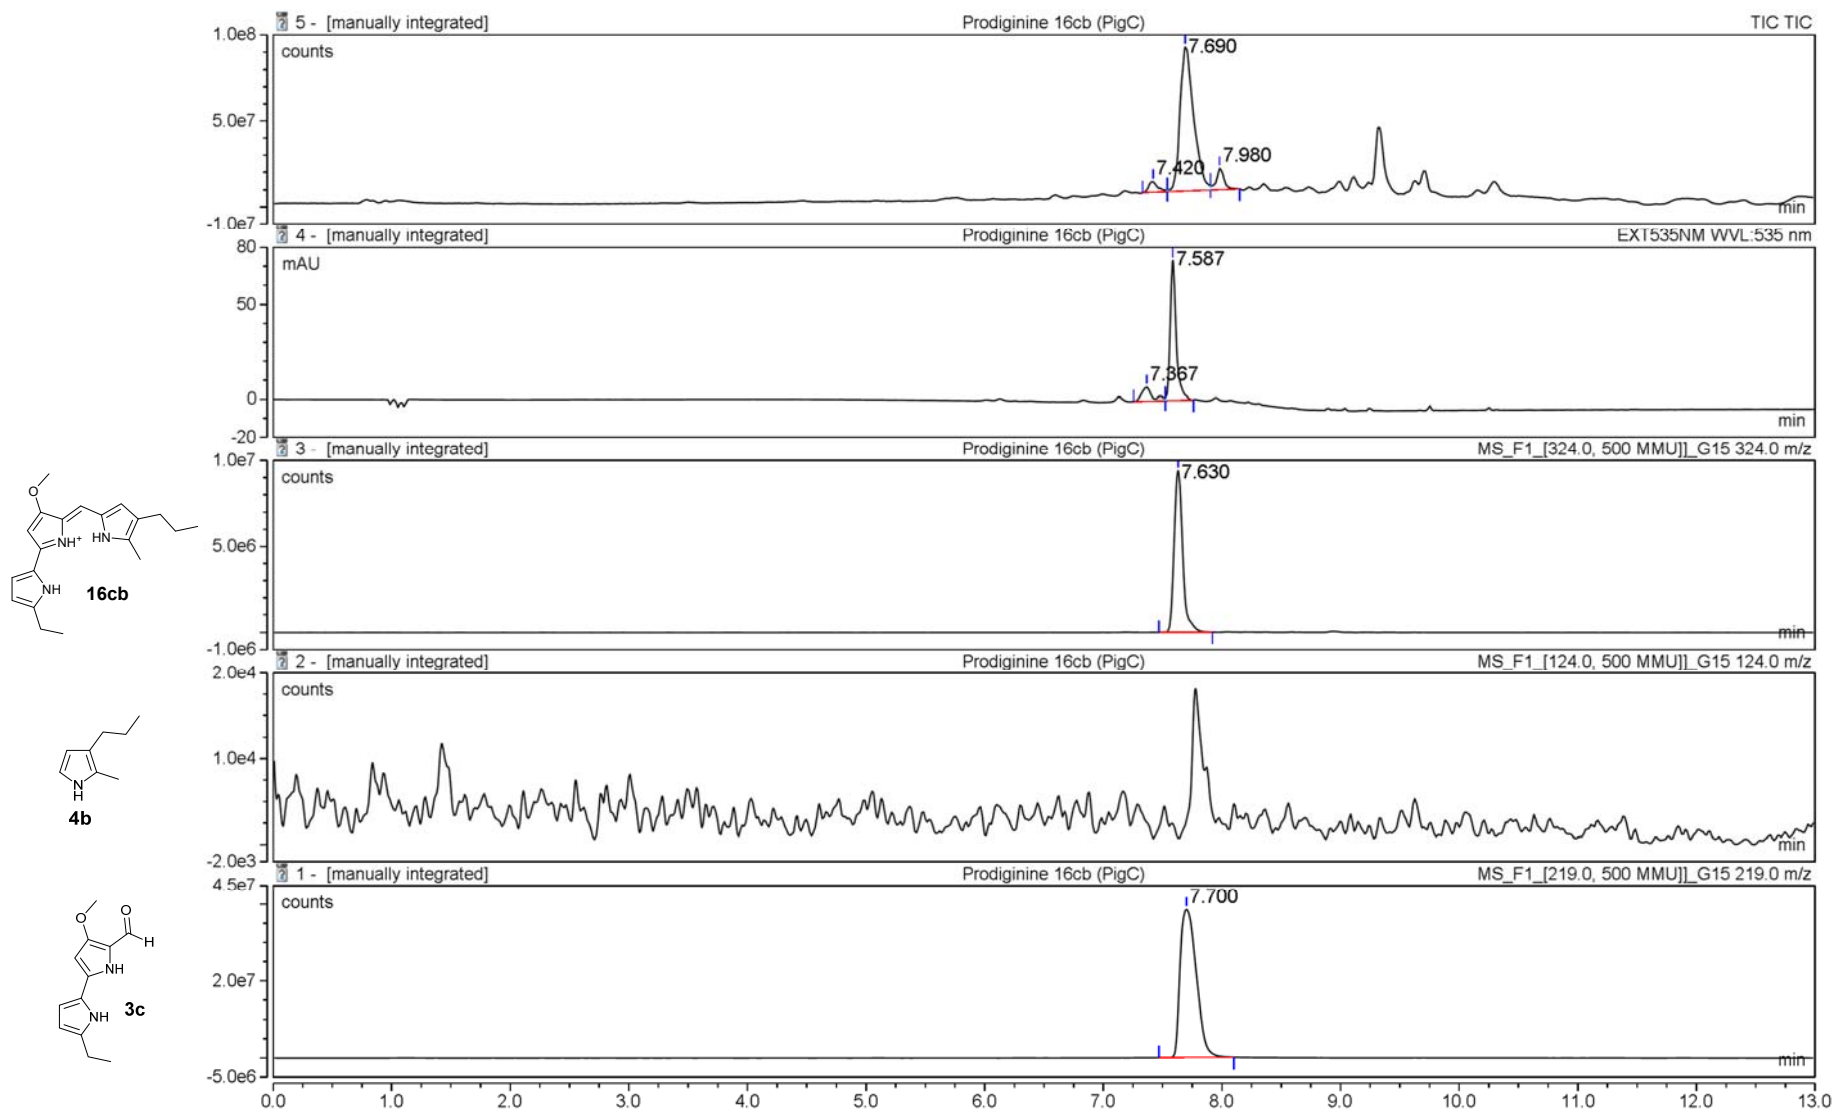

**Figure S60:** LC-MS data [from top to bottom: TIC, UV<sub>535</sub> trace, and EIC of the potential product prodiginine **16cb** ( $m/z$  324.0) and the educts pyrrole **4b** ( $m/z$  124.0) and MBC **3c** ( $m/z$  219.0)] from a representative methanolic reaction extract of the PigC-catalysed condensation reaction between pyrrole **4b** and MBC **3c**. The structures of starting materials and the expected condensation product are shown on the left-hand site besides the corresponding EIC. Retention time of prodiginine **16cb**  $t_R$  7.59 min.

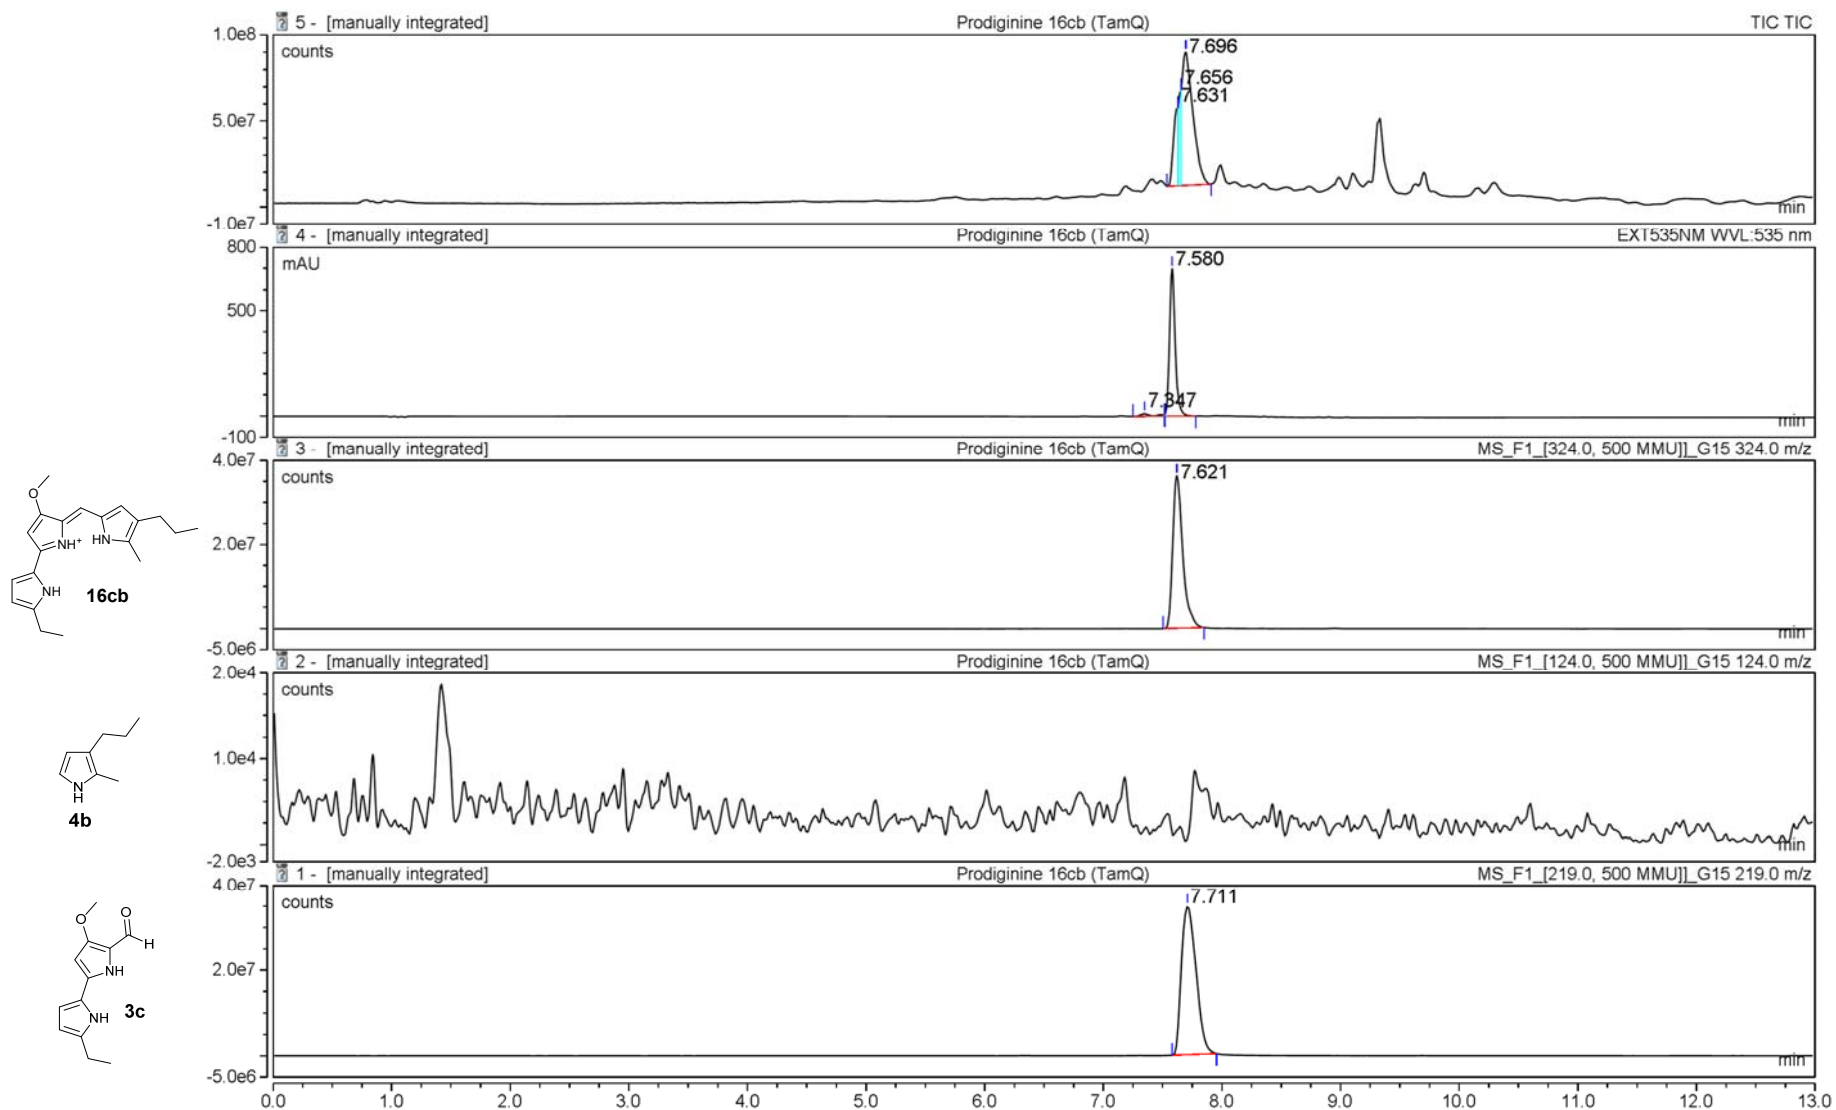

**Figure S61:** LC-MS data [from top to bottom: TIC, UV<sub>535</sub> trace, and EIC of the potential product prodiginine **16cb** (m/z 324.0) and the educts pyrrole **4b** (m/z 124.0) and MBC **3c** (m/z 219.0)] from a representative methanolic reaction extract of the TamQ-catalysed condensation reaction between pyrrole **4b** and MBC **3c**. The structures of starting materials and the expected condensation product are shown on the left-hand site besides the corresponding EIC. Retention time of prodiginine **16cb**  $t_R$  7.58 min.

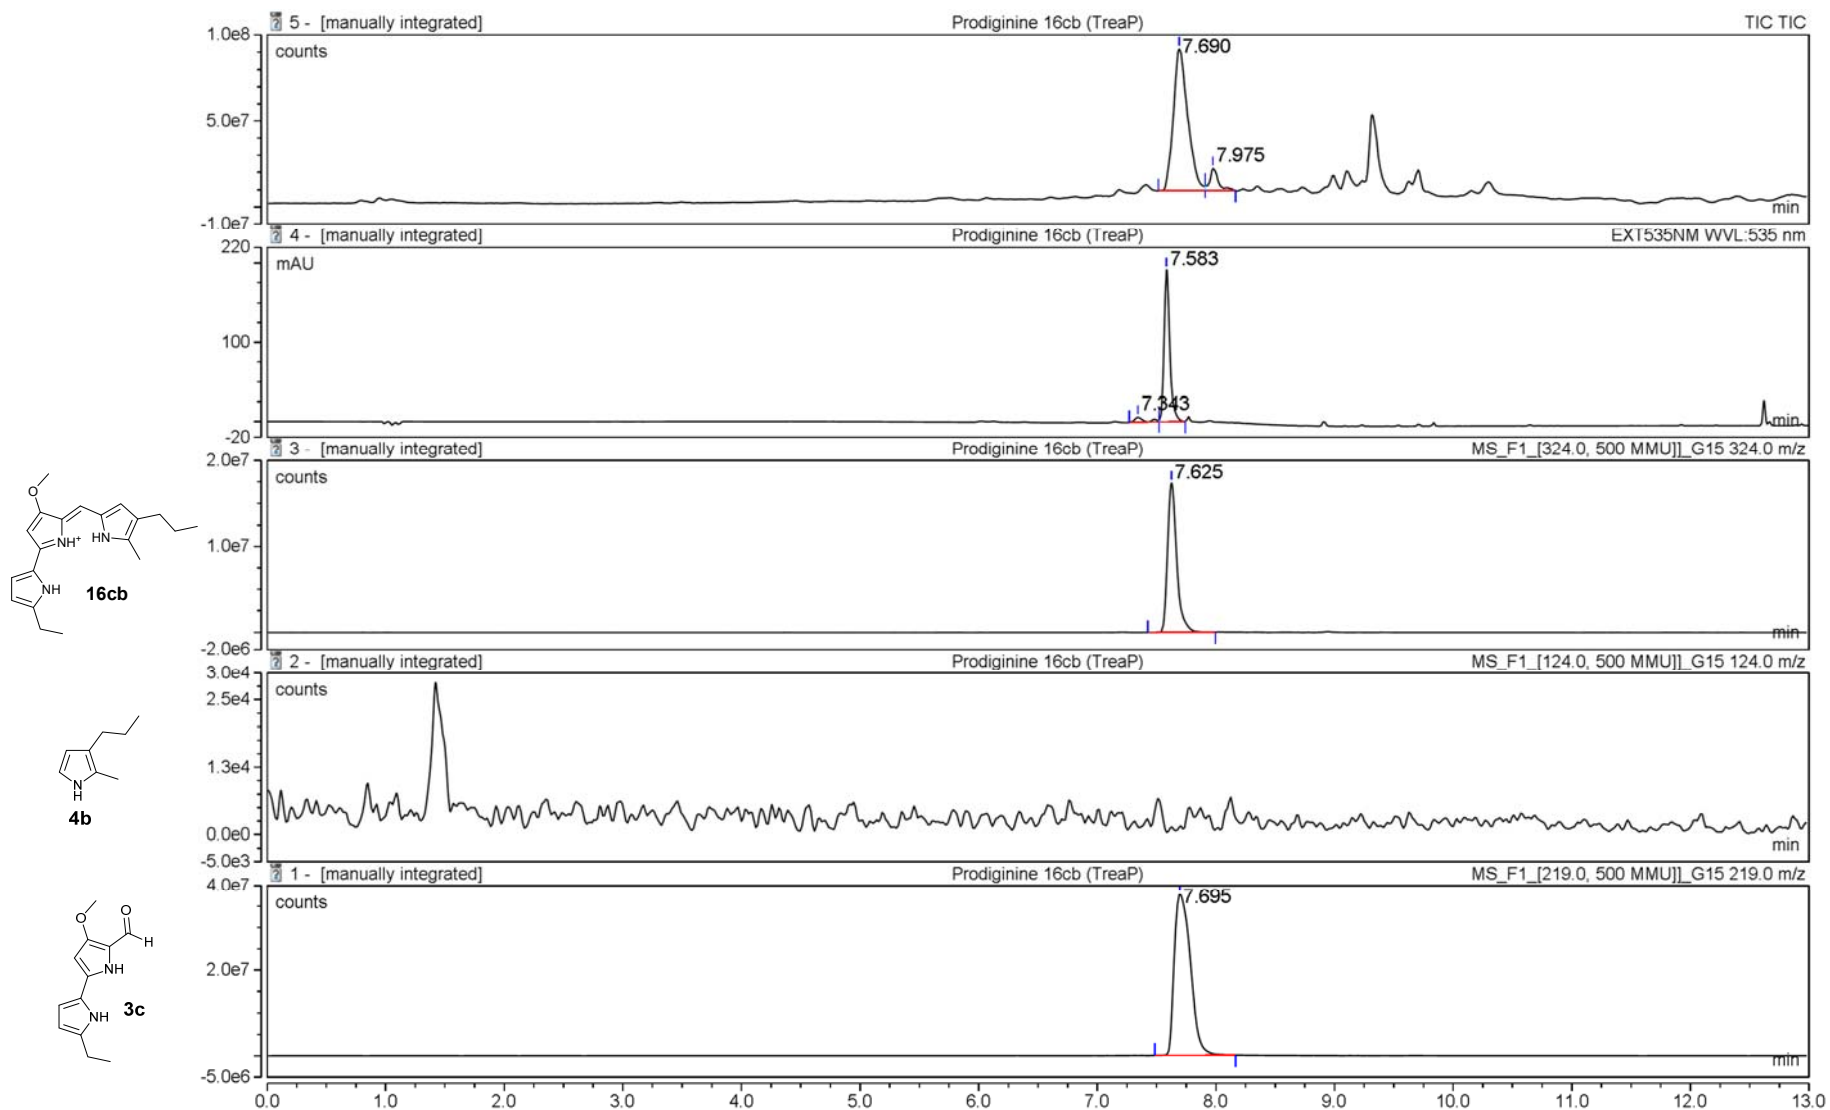

**Figure S62:** LC-MS data [from top to bottom: TIC, UV<sub>535</sub> trace, and EIC of the potential product prodiginine **16cb** (m/z 324.0) and the educts pyrrole **4b** (m/z 124.0) and MBC **3c** (m/z 219.0)] from a representative methanolic reaction extract of the TreaP-catalysed condensation reaction between pyrrole **4b** and MBC **3c**. The structures of starting materials and the expected condensation product are shown on the left-hand site besides the corresponding EIC. Retention time of prodiginine **16cb**  $t_R$  7.58 min.



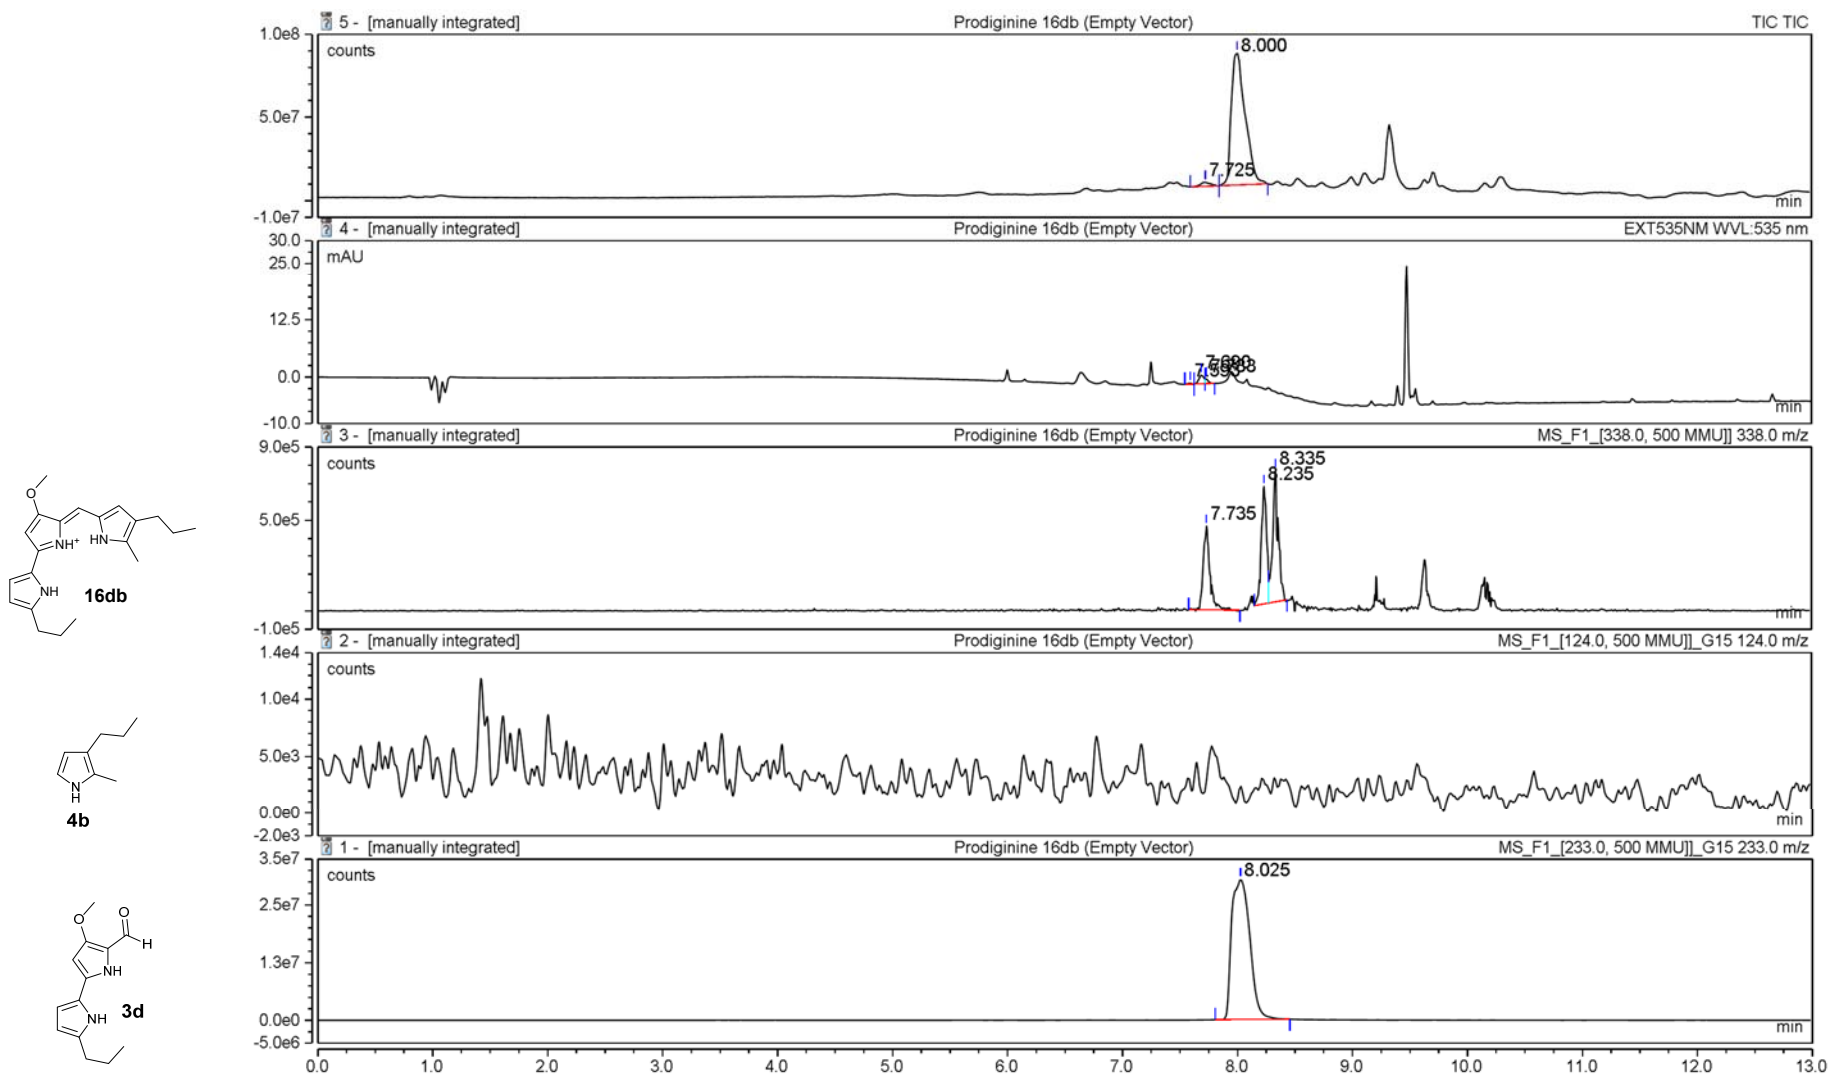

**Figure S63:** LC-MS data [from top to bottom: TIC, UV<sub>535</sub> trace, and extracted ion chromatograms (EIC) of the potential product prodigiosin **16db** (m/z 338.0) and the educts pyrrole **4b** (m/z 124.0) and MBC **3d** (m/z 233.0)] from a representative methanolic reaction extract of the biocatalytic empty vector control reaction between pyrrole **4b** and MBC **3d**. The structures of starting materials and the expected condensation product are shown on the left-hand site besides the corresponding EIC. The small amount of prodigiosin **16db** found in the EIC (middle chromatogram) can be traced back to acid-catalysed condensation between pyrrole and MBC during chromatography with 0.1% formic acid. Integration of the corresponding signal from the UV<sub>535</sub> trace gives an integral of 0 mAU·min.

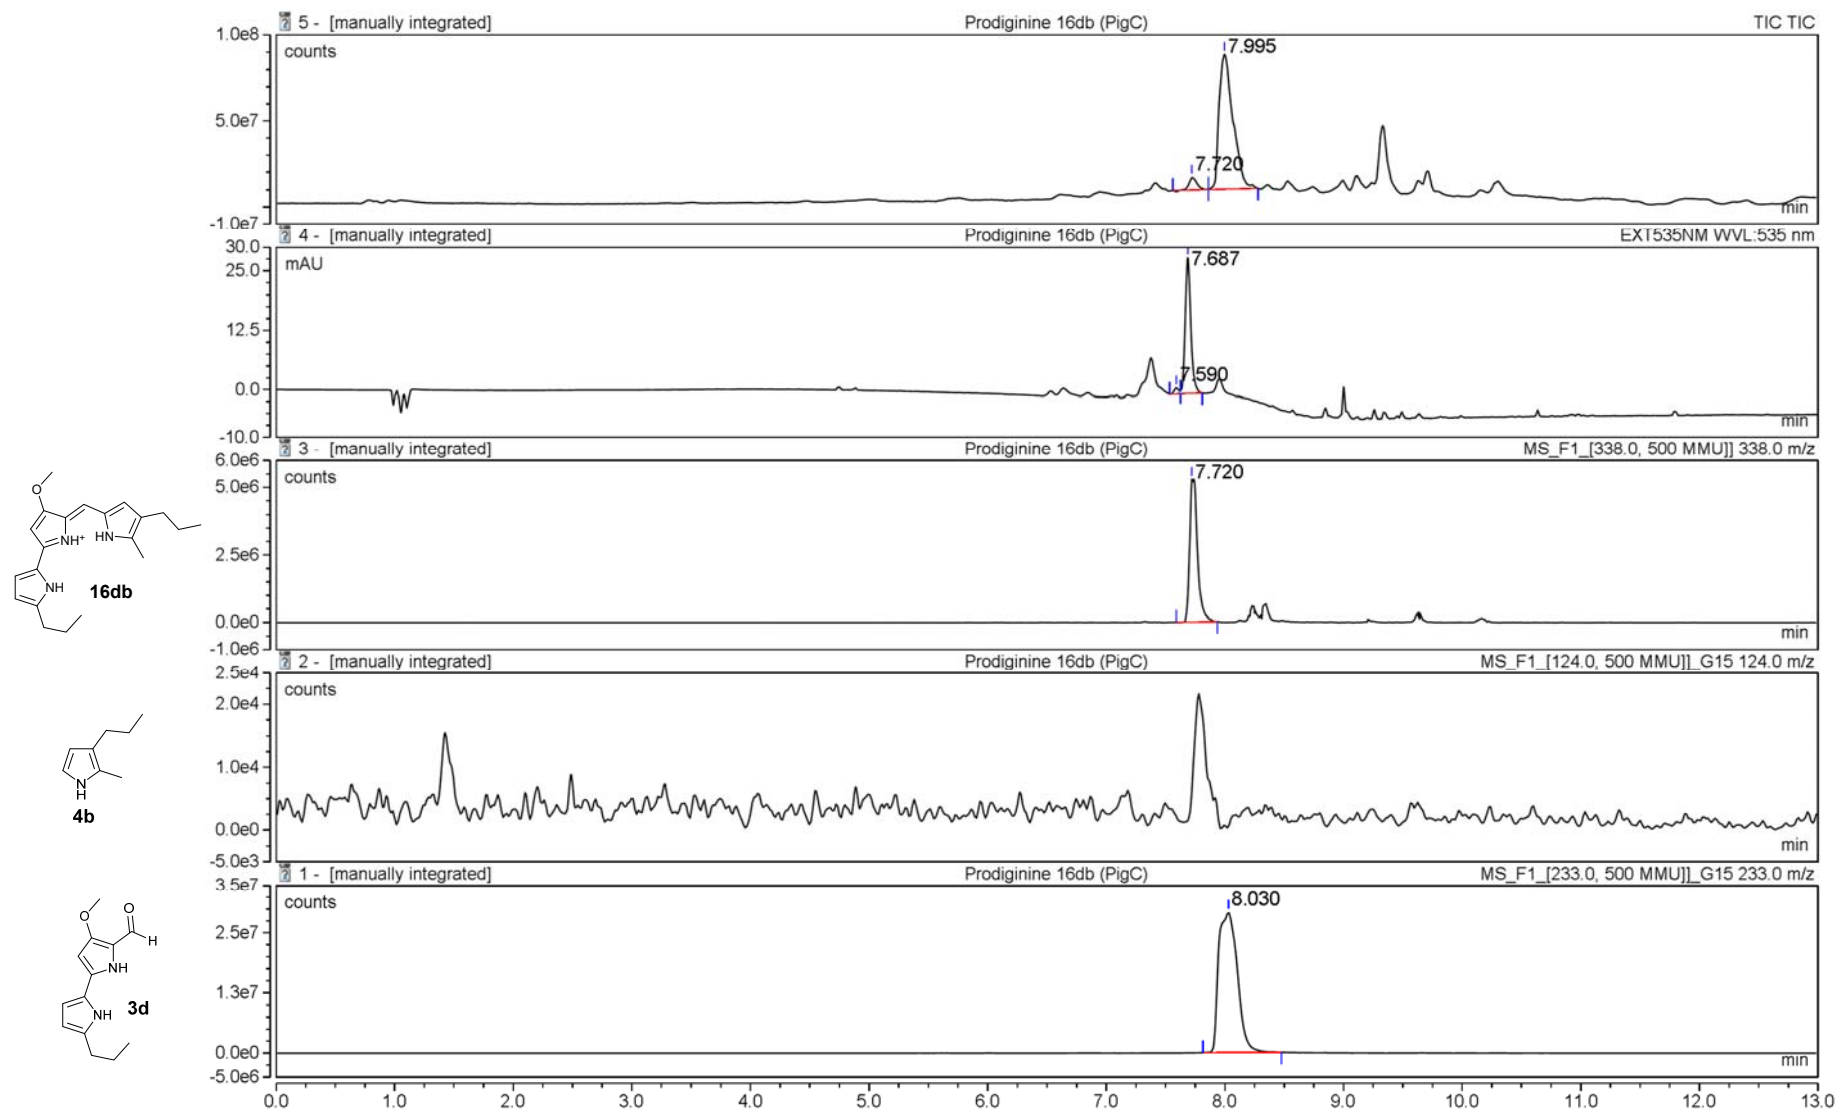

**Figure S64:** LC-MS data [from top to bottom: TIC, UV<sub>535</sub> trace, and EIC of the potential product prodiginine **16db** (m/z 338.0) and the educts pyrrole **4b** (m/z 124.0) and MBC **3d** (m/z 233.0)] from a representative methanolic reaction extract of the PigC-catalysed condensation reaction between pyrrole **4b** and MBC **3d**. The structures of starting materials and the expected condensation product are shown on the left-hand site besides the corresponding EIC. Retention time of prodiginine **16db**  $t_R$  7.69 min.

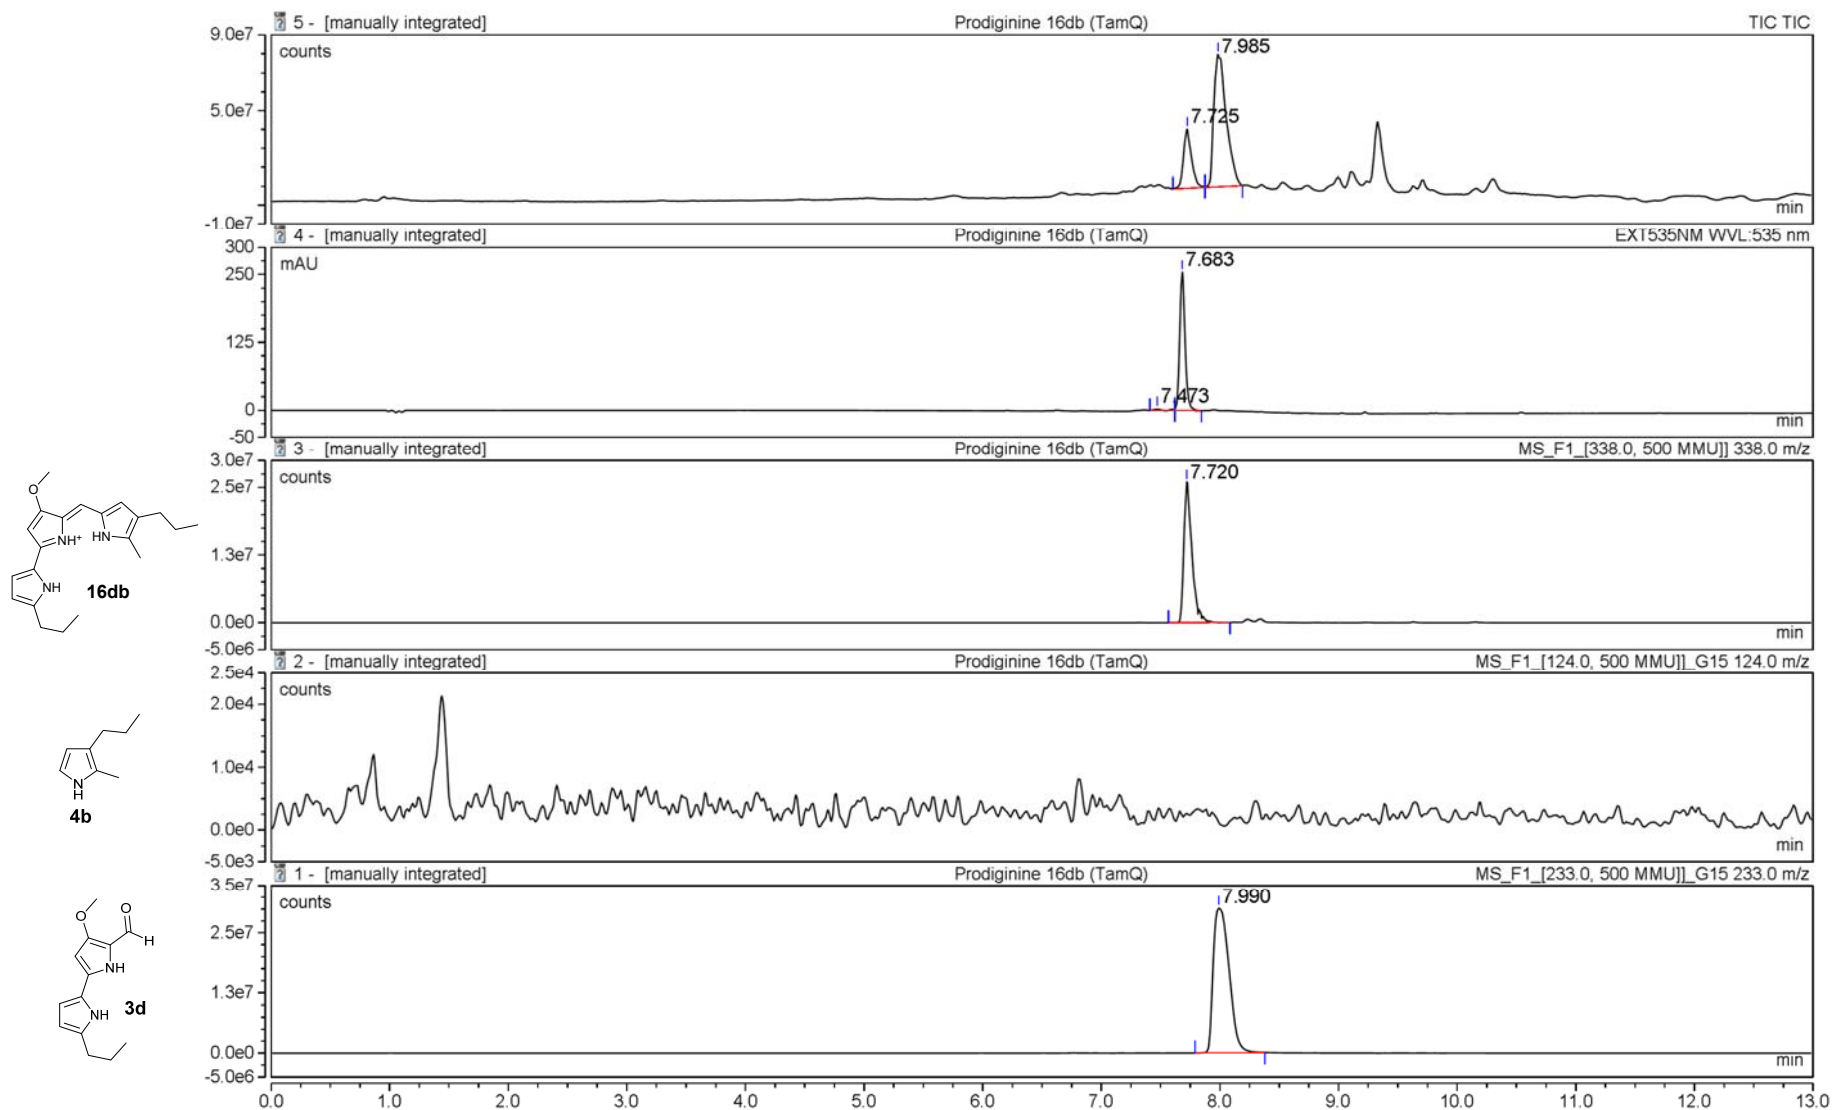

**Figure S65:** LC-MS data [from top to bottom: TIC, UV<sub>535</sub> trace, and EIC of the potential product prodiginine **16db** (m/z 338.0) and the educts pyrrole **4b** (m/z 124.0) and MBC **3d** (m/z 233.0)] from a representative methanolic reaction extract of the TamQ-catalysed condensation reaction between pyrrole **4b** and MBC **3d**. The structures of starting materials and the expected condensation product are shown on the left-hand site besides the corresponding EIC. Retention time of prodiginine **16db**  $t_R$  7.68 min.

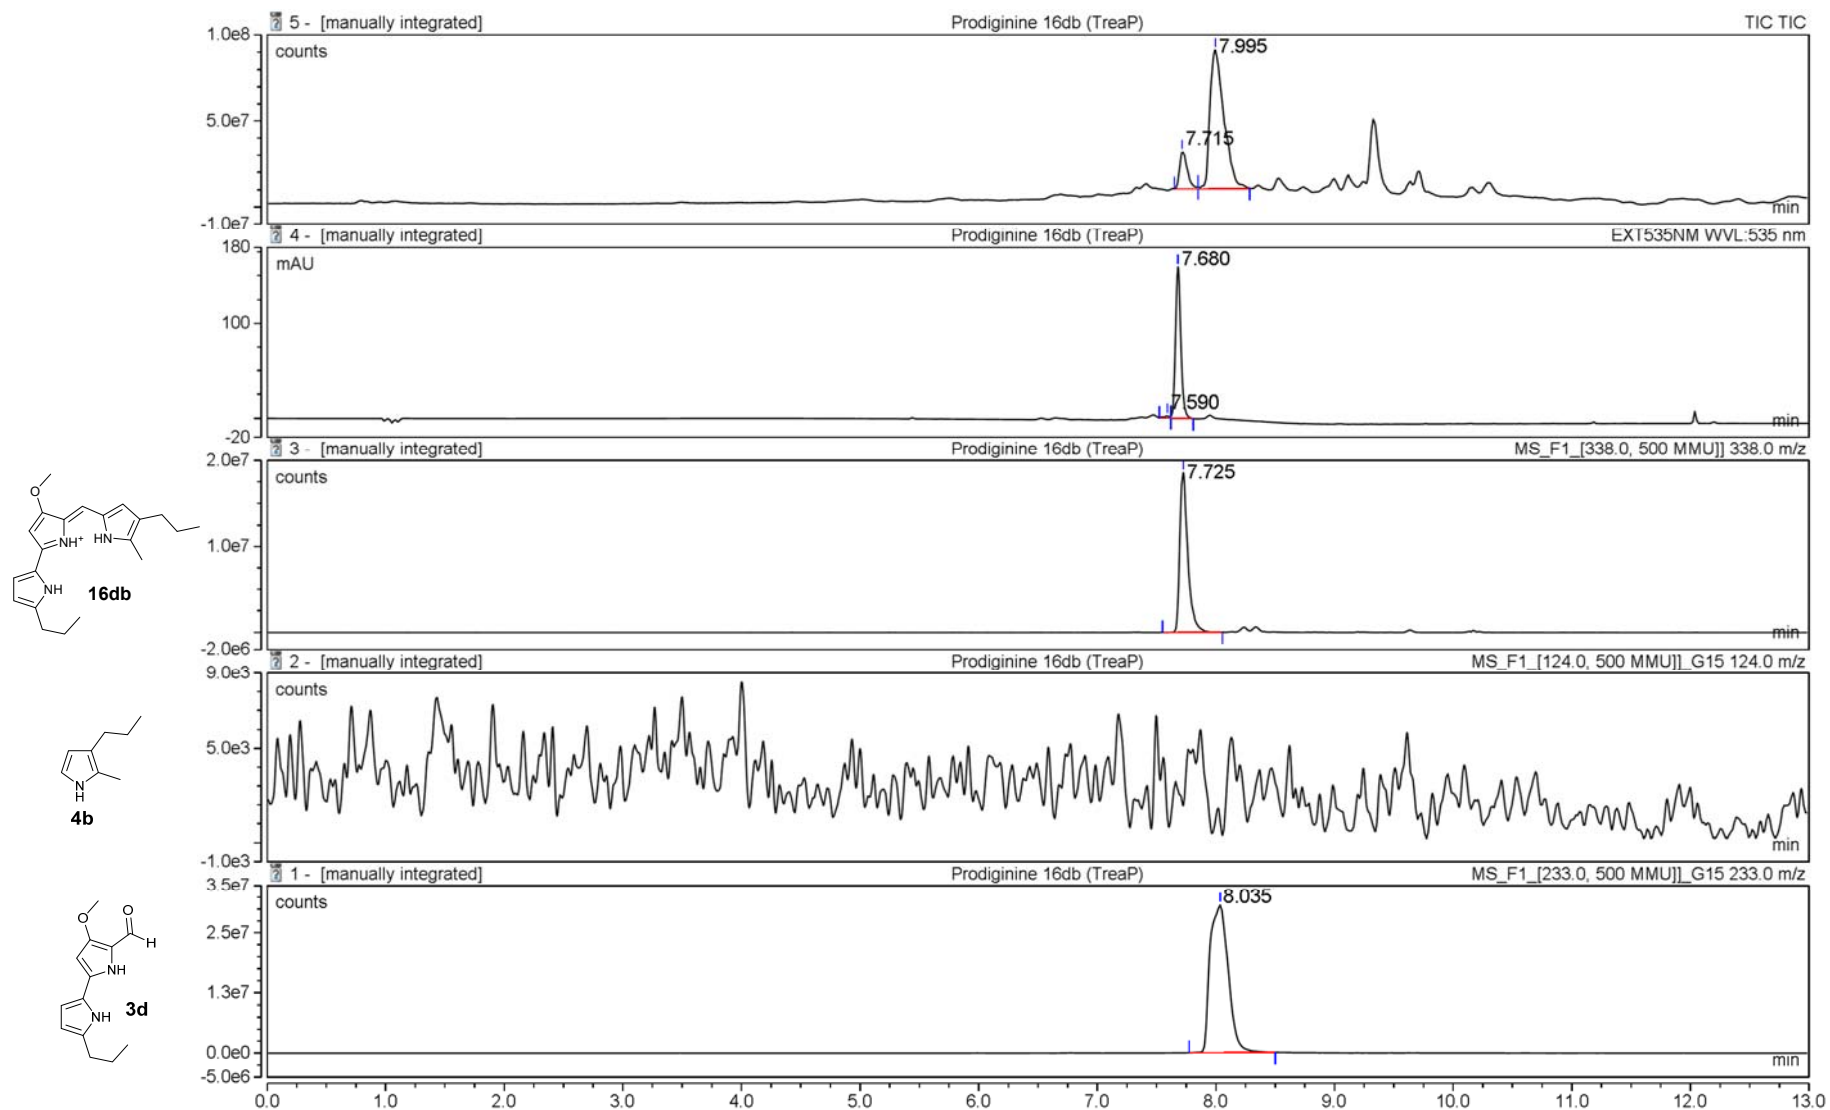

**Figure S66:** LC-MS data [from top to bottom: TIC, UV<sub>535</sub> trace, and EIC of the potential product prodiginine **16db** (m/z 338.0) and the educts pyrrole **4b** (m/z 124.0) and MBC **3d** (m/z 233.0)] from a representative methanolic reaction extract of the TreaP-catalysed condensation reaction between pyrrole **4b** and MBC **3d**. The structures of starting materials and the expected condensation product are shown on the left-hand site besides the corresponding EIC. Retention time of prodiginine **16db**  $t_R$  7.68 min.

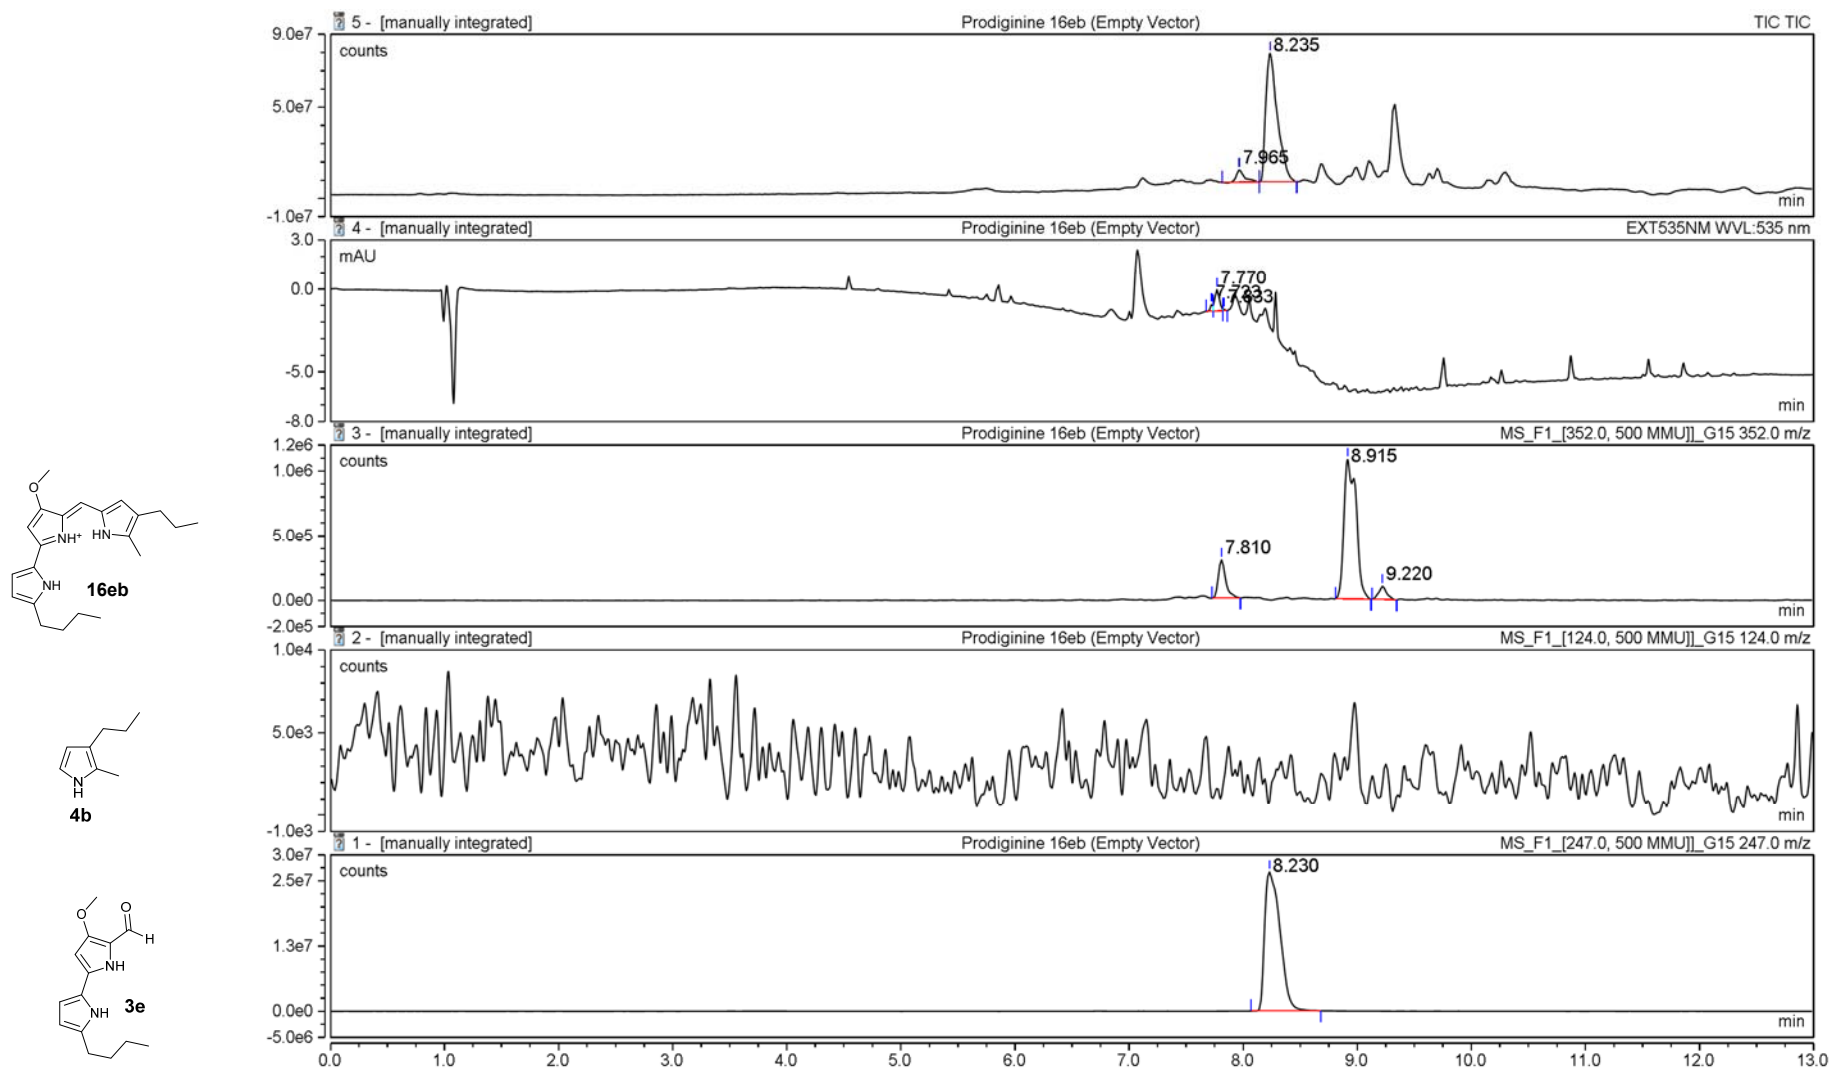

**Figure S67:** LC-MS data [from top to bottom: TIC, UV<sub>535</sub> trace, and extracted ion chromatograms (EIC) of the potential product prodiginosin **16eb** (m/z 352.0) and the educts pyrrole **4b** (m/z 124.0) and MBC **3e** (m/z 247.0)] from a representative methanolic reaction extract of the biocatalytic empty vector control reaction between pyrrole **4b** and MBC **3e**. The structures of starting materials and the expected condensation product are shown on the left-hand site besides the corresponding EIC. The small amount of prodiginosin **16eb** found in the EIC (middle chromatogram) can be traced back to acid-catalysed condensation between pyrrole and MBC during chromatography with 0.1% formic acid. Integration of the corresponding signal from the UV<sub>535</sub> trace gives an integral of 0 mAU·min.

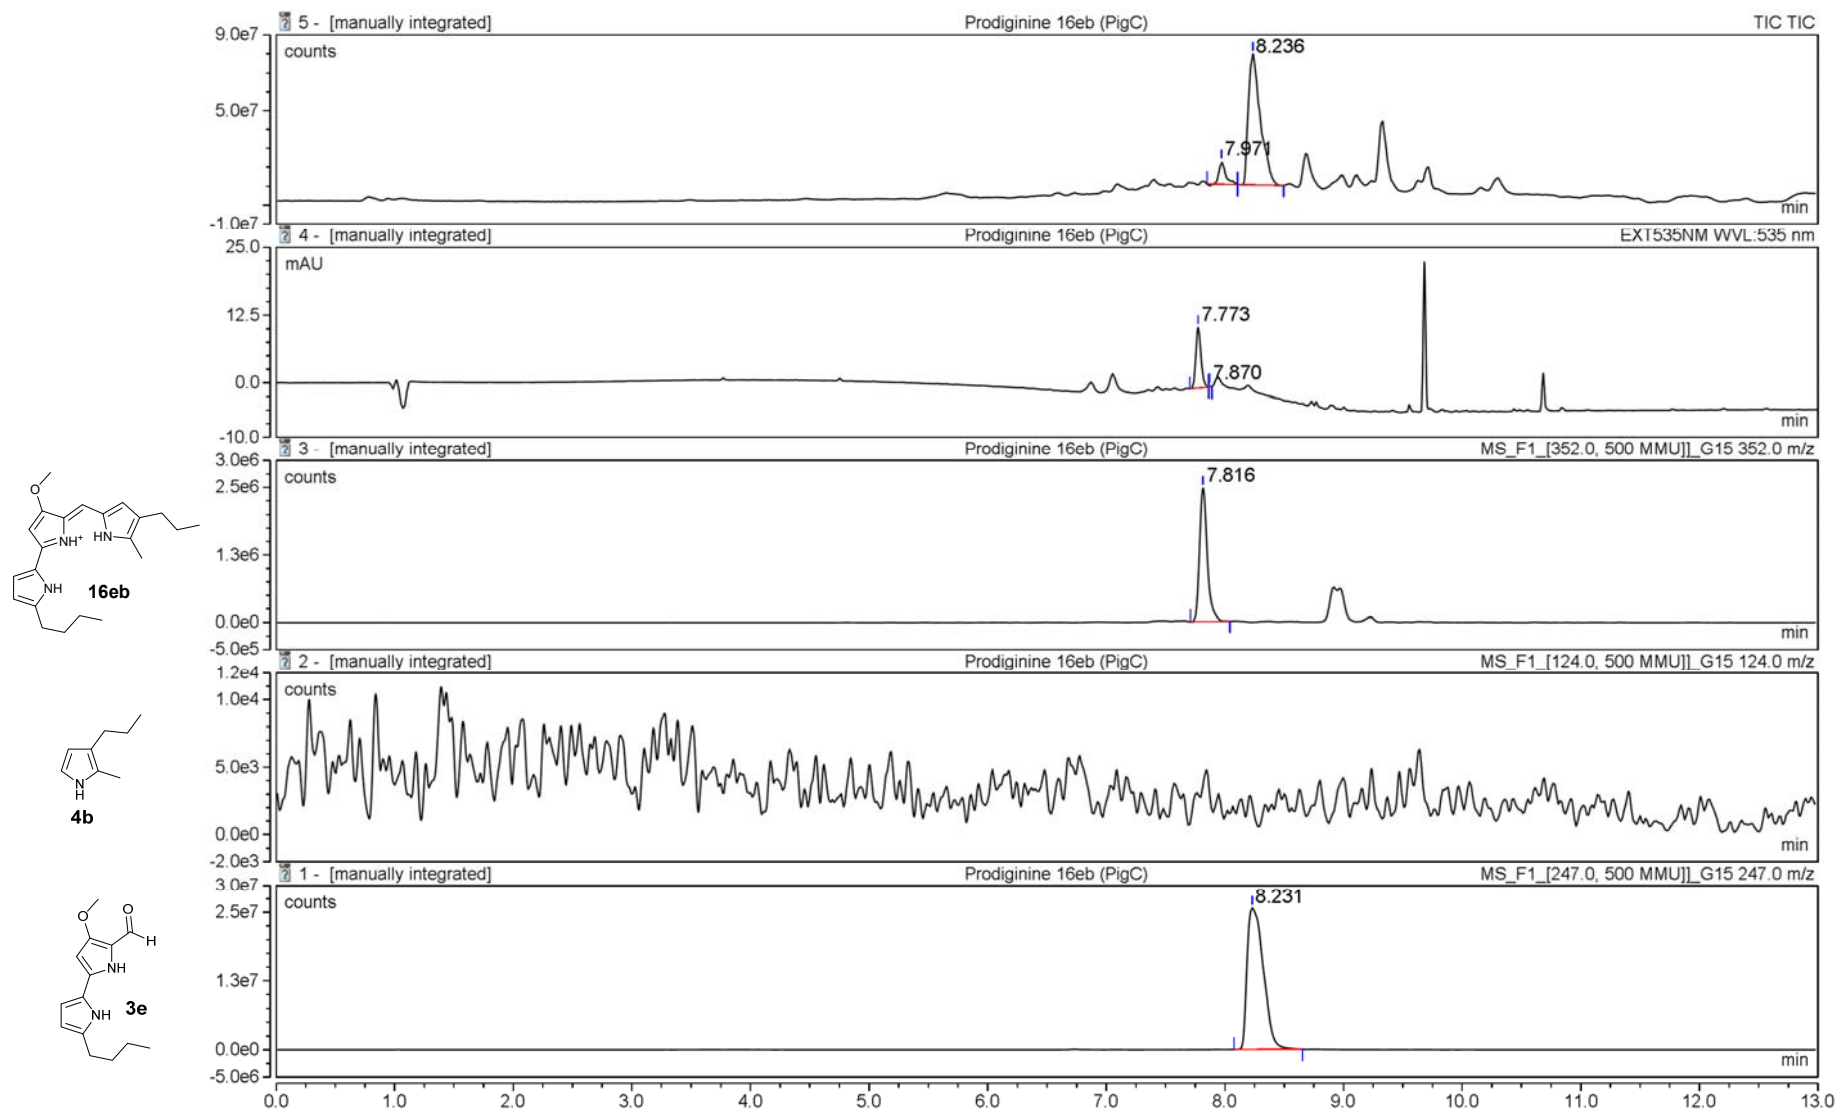

**Figure S68:** LC-MS data [from top to bottom: TIC, UV<sub>535</sub> trace, and EIC of the potential product prodiginine **16eb** ( $m/z$  352.0) and the educts pyrrole **4b** ( $m/z$  124.0) and MBC **3e** ( $m/z$  247.0)] from a representative methanolic reaction extract of the PigC-catalysed condensation reaction between pyrrole **4b** and MBC **3e**. The structures of starting materials and the expected condensation product are shown on the left-hand site besides the corresponding EIC. Retention time of prodiginine **16eb**  $t_R$  7.77 min.

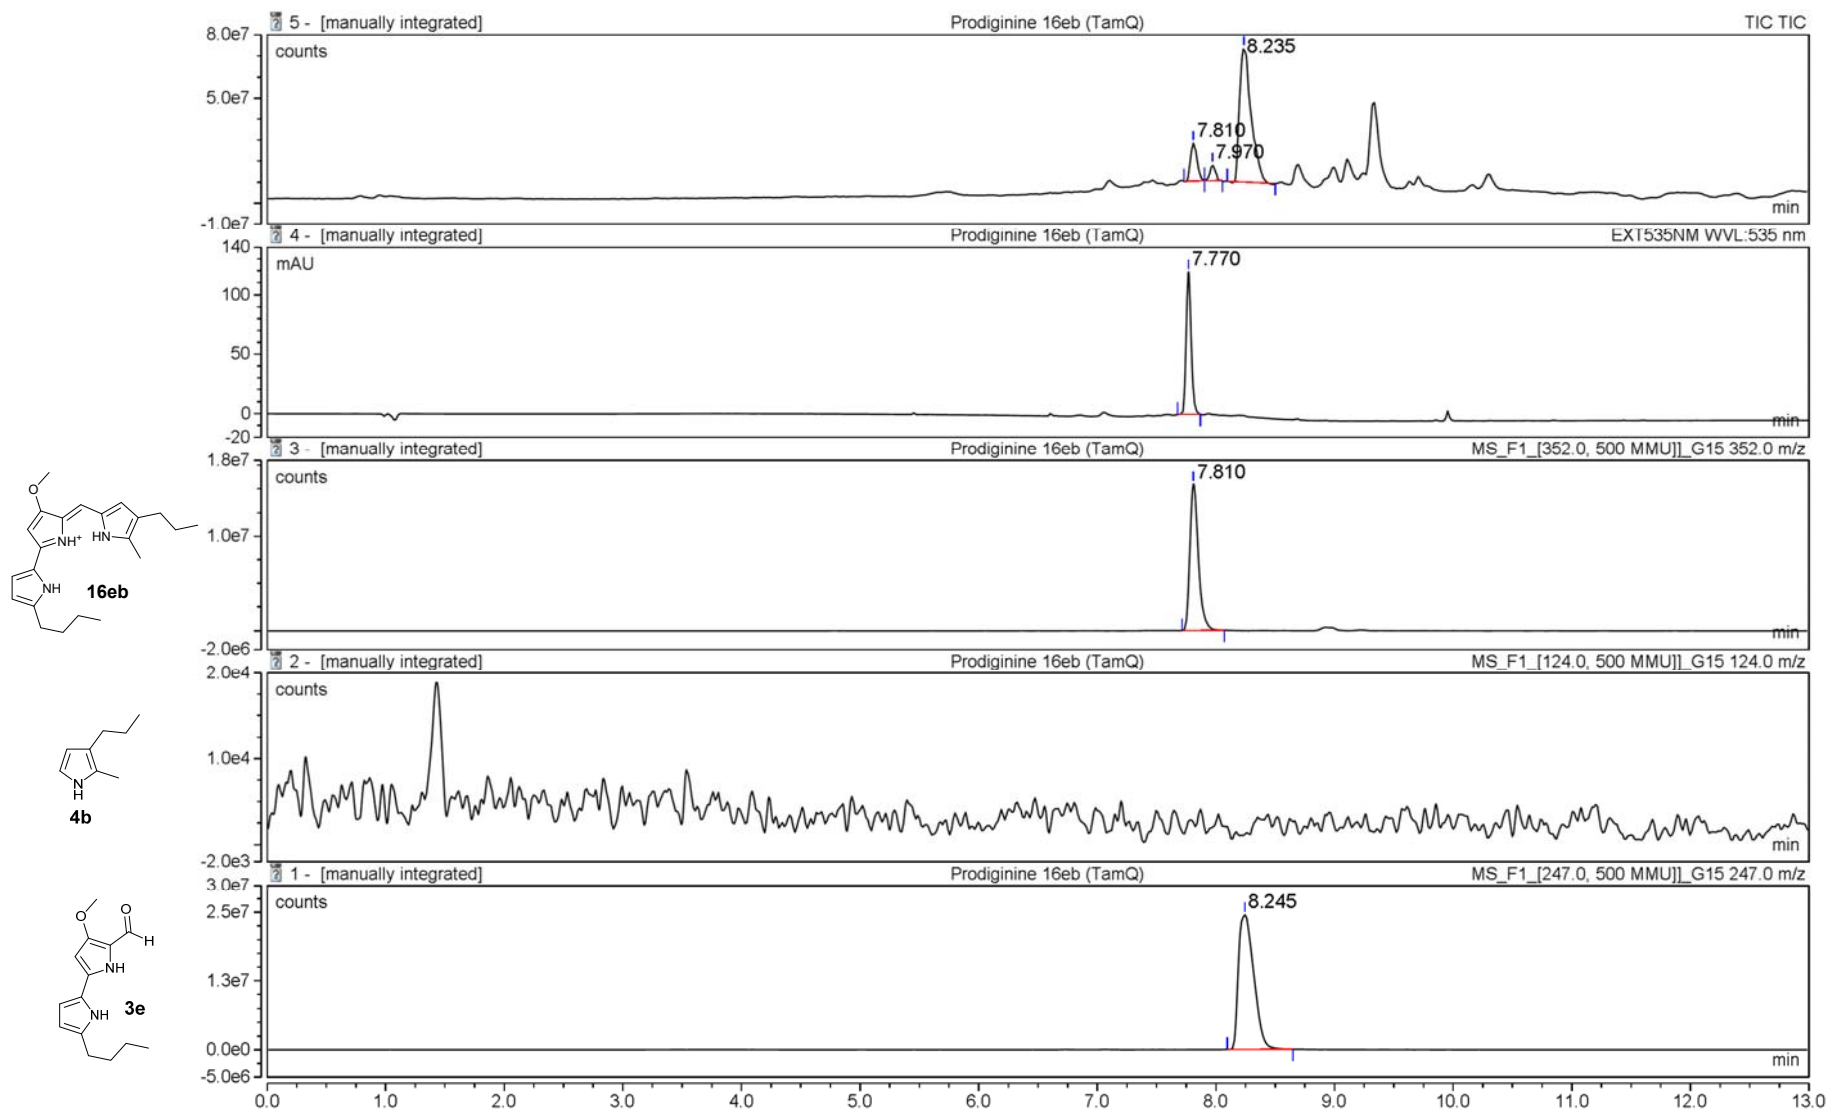

**Figure S69:** LC-MS data [from top to bottom: TIC, UV<sub>535</sub> trace, and EIC of the potential product prodiginine **16eb** (m/z 352.0) and the educts pyrrole **4b** (m/z 124.0) and MBC **3e** (m/z 247.0)] from a representative methanolic reaction extract of the TamQ-catalysed condensation reaction between pyrrole **4b** and MBC **3e**. The structures of starting materials and the expected condensation product are shown on the left-hand side besides the corresponding EIC. Retention time of prodiginine **16eb**  $t_R$  7.77 min.

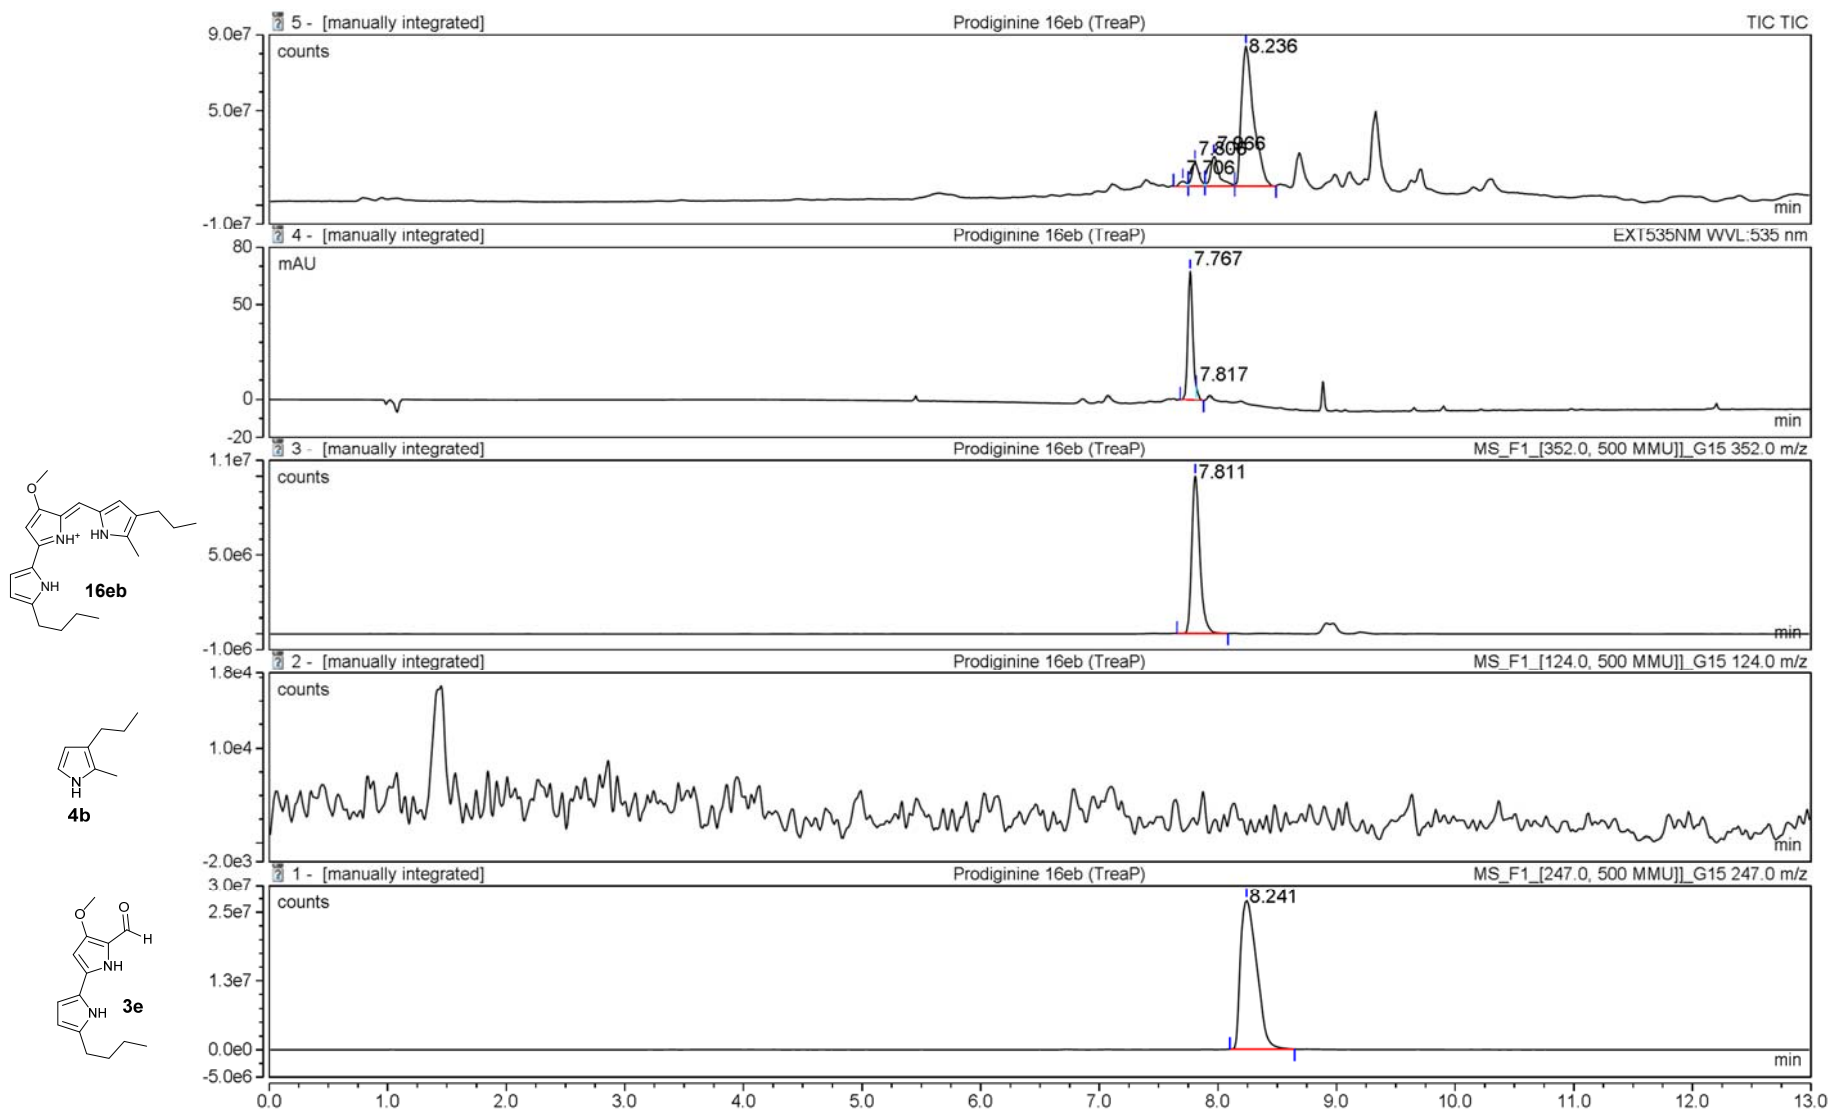

**Figure S70:** LC-MS data [from top to bottom: TIC, UV<sub>535</sub> trace, and EIC of the potential product prodiginine **16eb** (m/z 352.0) and the educts pyrrole **4b** (m/z 124.0) and MBC **3e** (m/z 247.0)] from a representative methanolic reaction extract of the TreaP-catalysed condensation reaction between pyrrole **4b** and MBC **3e**. The structures of starting materials and the expected condensation product are shown on the left-hand side besides the corresponding EIC. Retention time of prodiginine **16eb**  $t_R$  7.77 min.



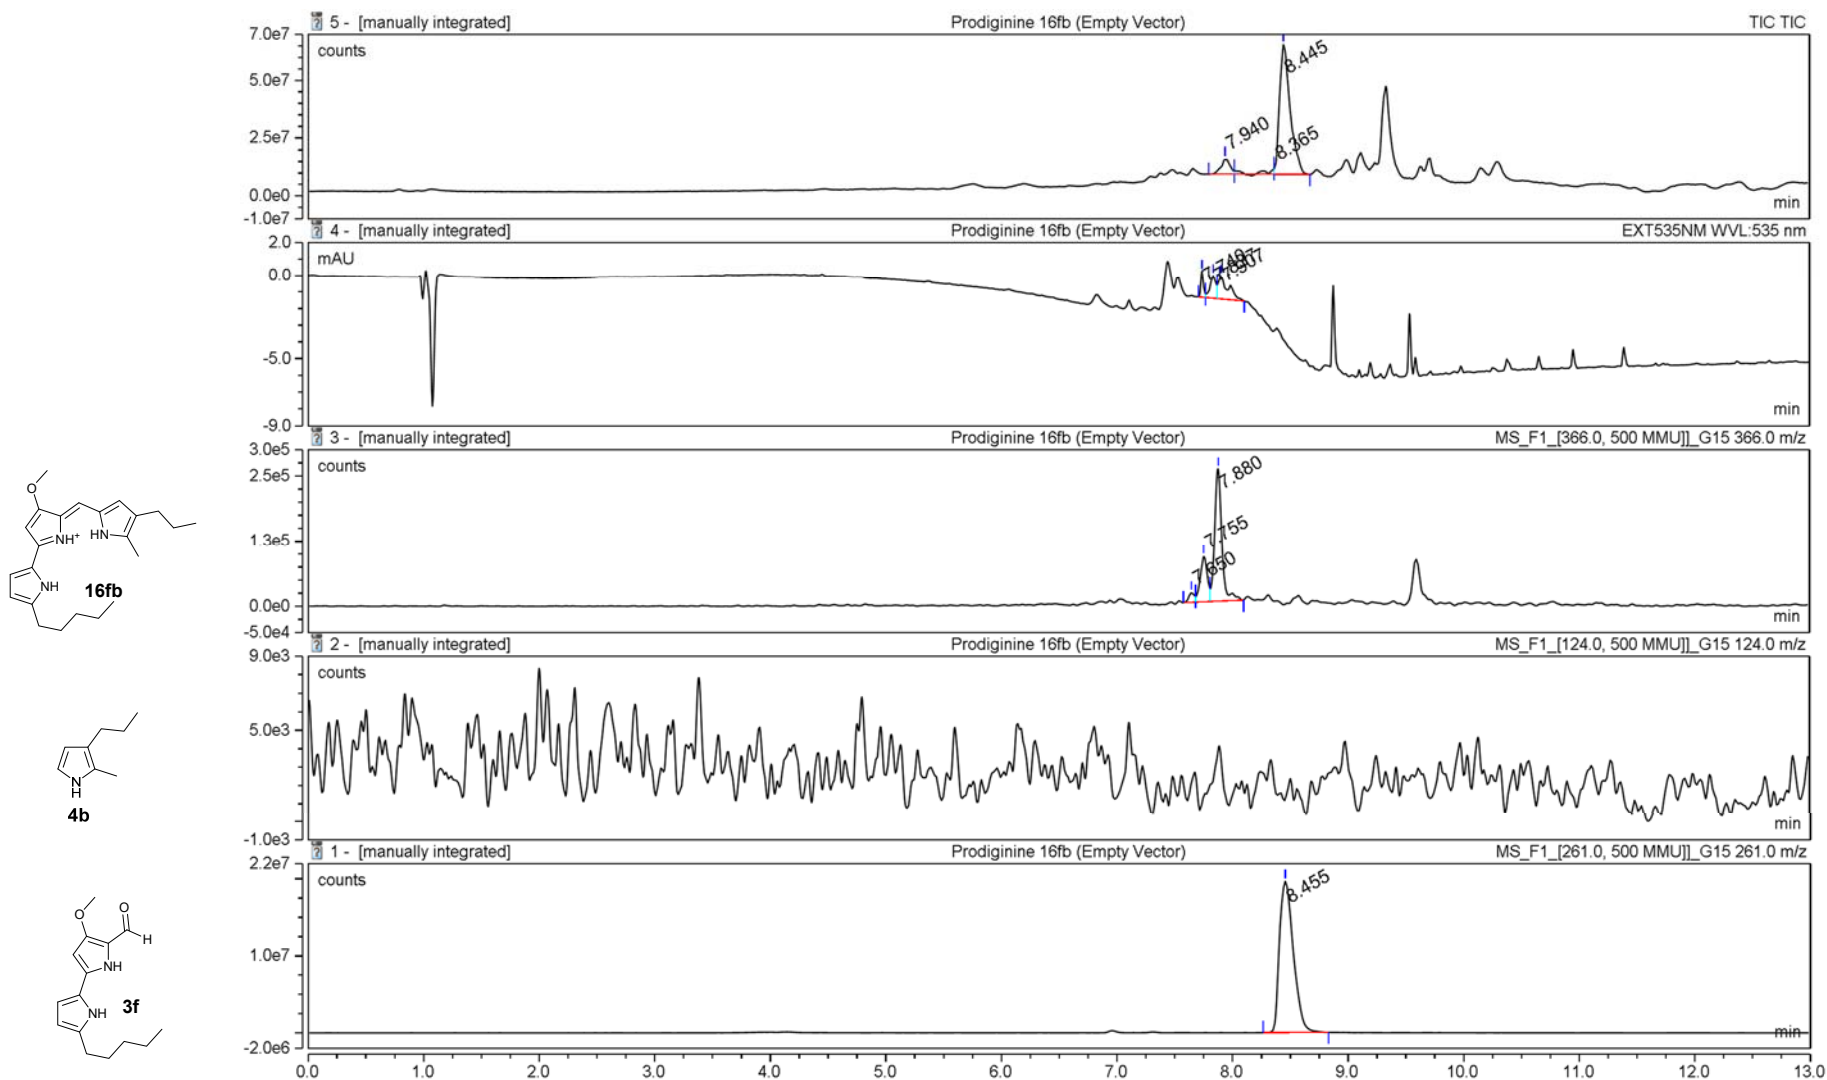

**Figure S71:** LC-MS data [from top to bottom: TIC, UV<sub>535</sub> trace, and extracted ion chromatograms (EIC) of the potential product prodigiosin **16fb** (m/z 366.0) and the educts pyrrole **4b** (m/z 124.0) and MBC **3f** (m/z 261.0)] from a representative methanolic reaction extract of the biocatalytic empty vector control reaction between pyrrole **4b** and MBC **3f**. The structures of starting materials and the expected condensation product are shown on the left-hand side besides the corresponding EIC. The small amount of prodigiosin **16fb** found in the EIC (middle chromatogram) can be traced back to acid-catalysed condensation between pyrrole and MBC during chromatography with 0.1% formic acid. Integration of the corresponding signal from the UV<sub>535</sub> trace gives an integral of 0 mAU·min.

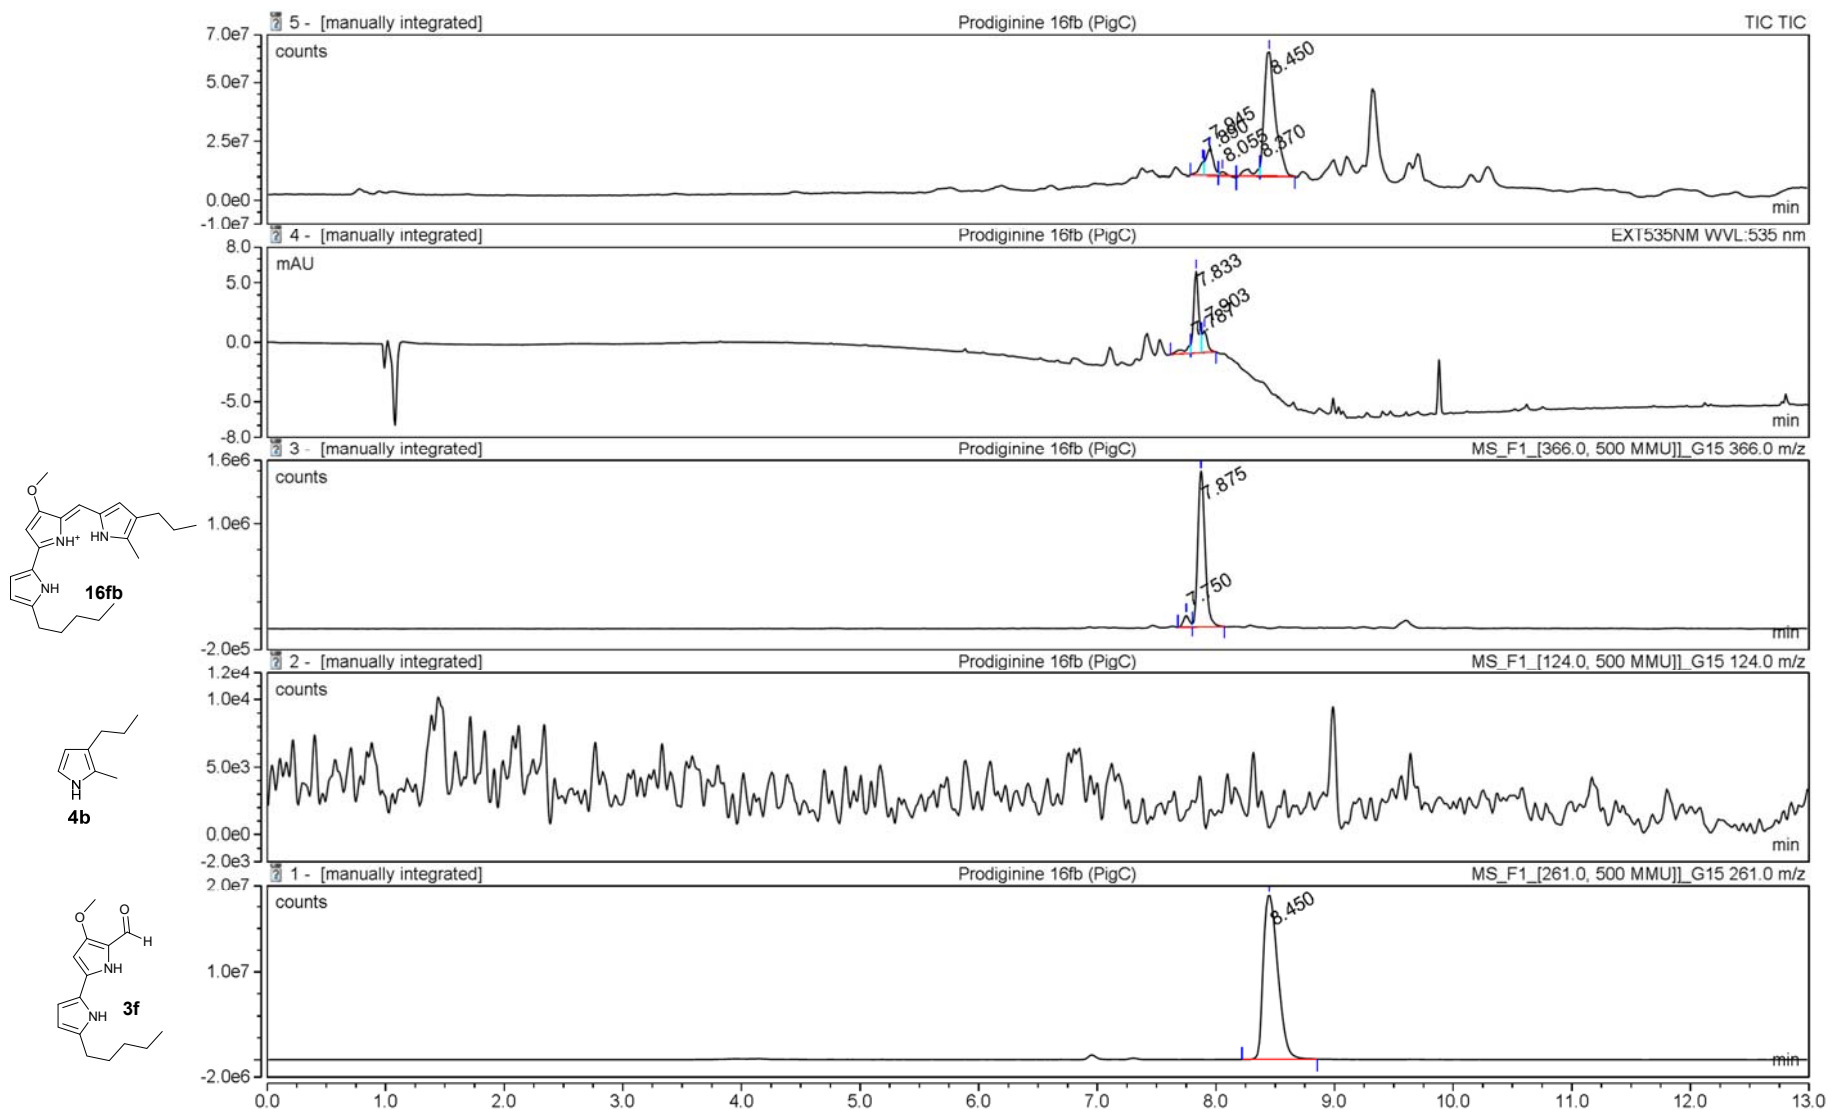

**Figure S72:** LC-MS data [from top to bottom: TIC, UV<sub>535</sub> trace, and EIC of the potential product prodiginine **16fb** (m/z 366.0) and the educts pyrrole **4b** (m/z 124.0) and MBC **3f** (m/z 261.0)] from a representative methanolic reaction extract of the PigC-catalysed condensation reaction between pyrrole **4b** and MBC **3f**. The structures of starting materials and the expected condensation product are shown on the left-hand site besides the corresponding EIC. Retention time of prodiginine **16fb**  $t_R$  7.83 min.

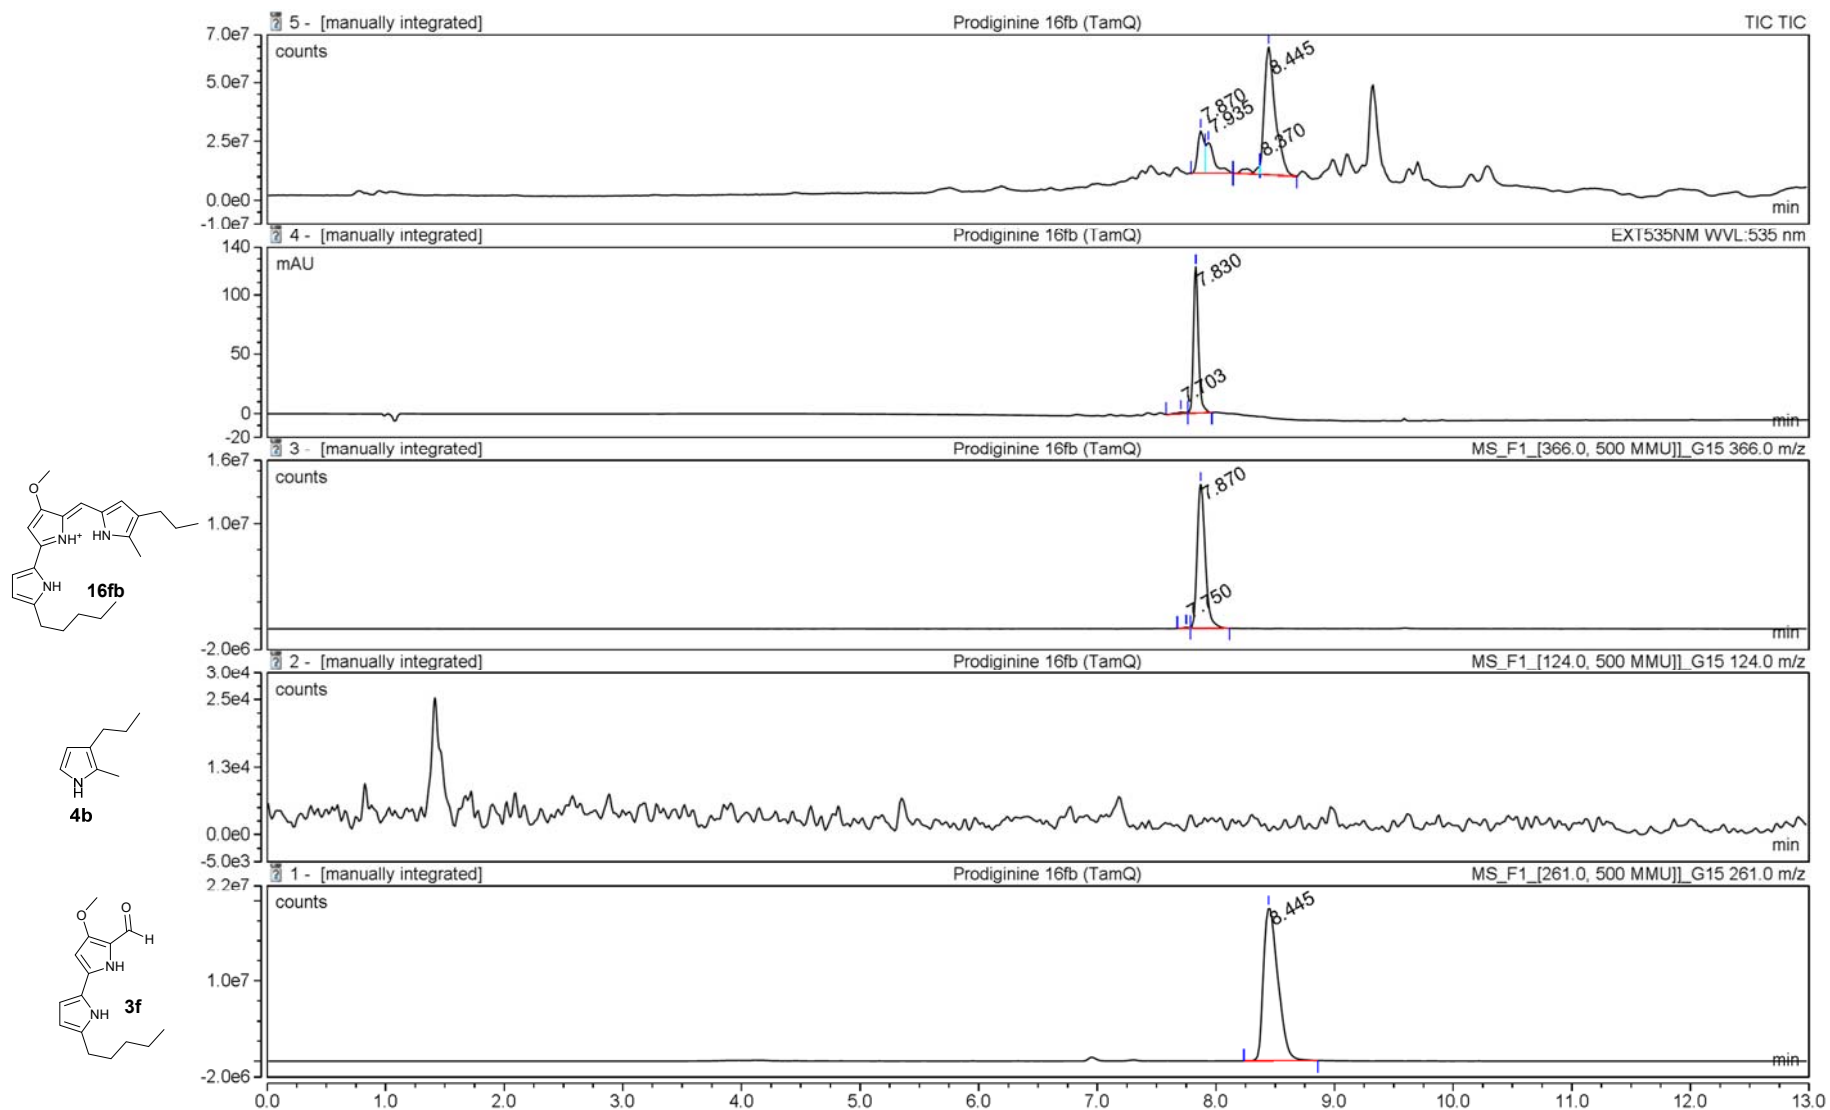

**Figure S73:** LC-MS data [from top to bottom: TIC, UV<sub>535</sub> trace, and EIC of the potential product prodiginine **16fb** (m/z 366.0) and the educts pyrrole **4b** (m/z 124.0) and MBC **3f** (m/z 261.0)] from a representative methanolic reaction extract of the TamQ-catalysed condensation reaction between pyrrole **4b** and MBC **3f**. The structures of starting materials and the expected condensation product are shown on the left-hand side besides the corresponding EIC. Retention time of prodiginine **16fb**  $t_R$  7.83 min.

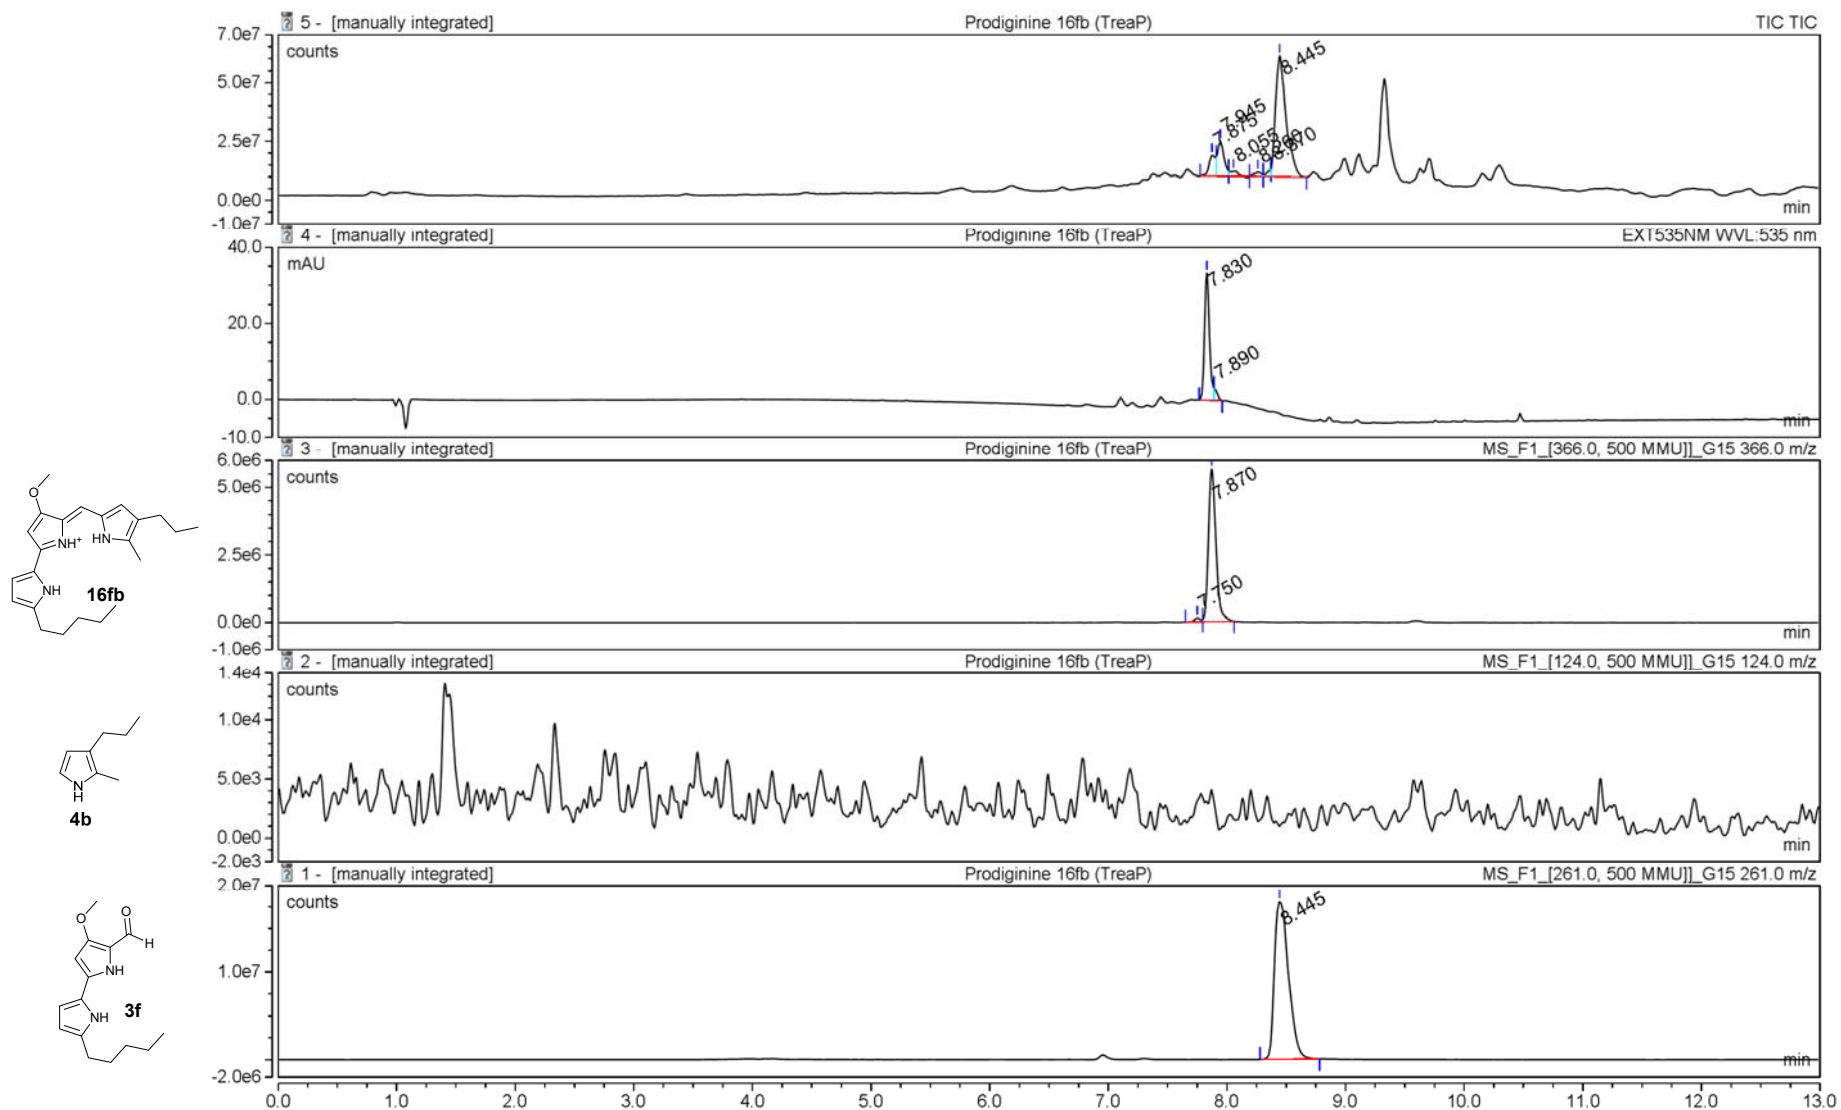

**Figure S74:** LC-MS data [from top to bottom: TIC, UV<sub>535</sub> trace, and EIC of the potential product prodiginine **16fb** (m/z 366.0) and the educts pyrrole **4b** (m/z 124.0) and MBC **3f** (m/z 261.0)] from a representative methanolic reaction extract of the TreaP-catalysed condensation reaction between pyrrole **4b** and MBC **3f**. The structures of starting materials and the expected condensation product are shown on the left-hand site besides the corresponding EIC. Retention time of prodiginine **16fb**  $t_R$  7.83 min.

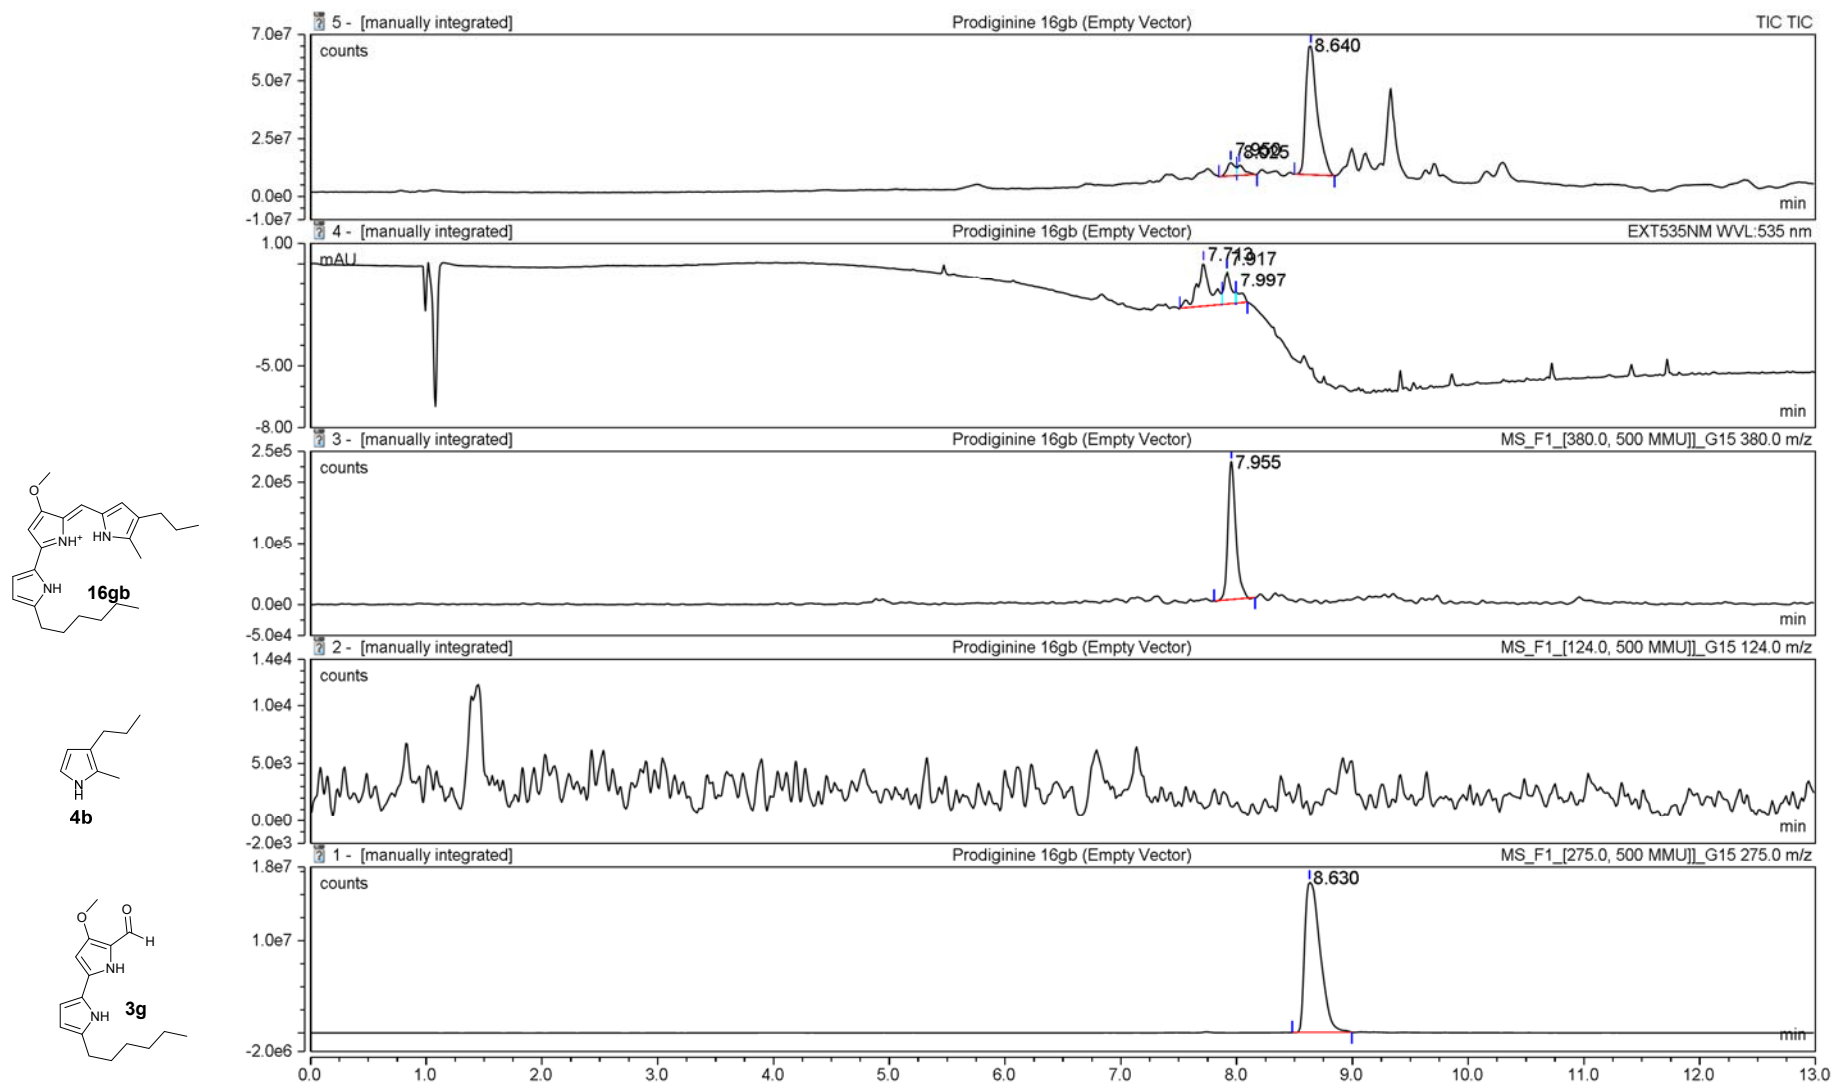

**Figure S75:** LC-MS data [from top to bottom: TIC, UV<sub>535</sub> trace, and extracted ion chromatograms (EIC) of the potential product prodiginosin **16gb** (m/z 380.0) and the educts pyrrole **4b** (m/z 124.0) and MBC **3g** (m/z 275.0)] from a representative methanolic reaction extract of the biocatalytic empty vector control reaction between pyrrole **4b** and MBC **3g**. The structures of starting materials and the expected condensation product are shown on the left-hand site besides the corresponding EIC. The small amount of prodiginosin **16gb** found in the EIC (middle chromatogram) can be traced back to acid-catalysed condensation between pyrrole and MBC during chromatography with 0.1% formic acid. Integration of the corresponding signal from the UV<sub>535</sub> trace gives an integral of 0 mAU·min.

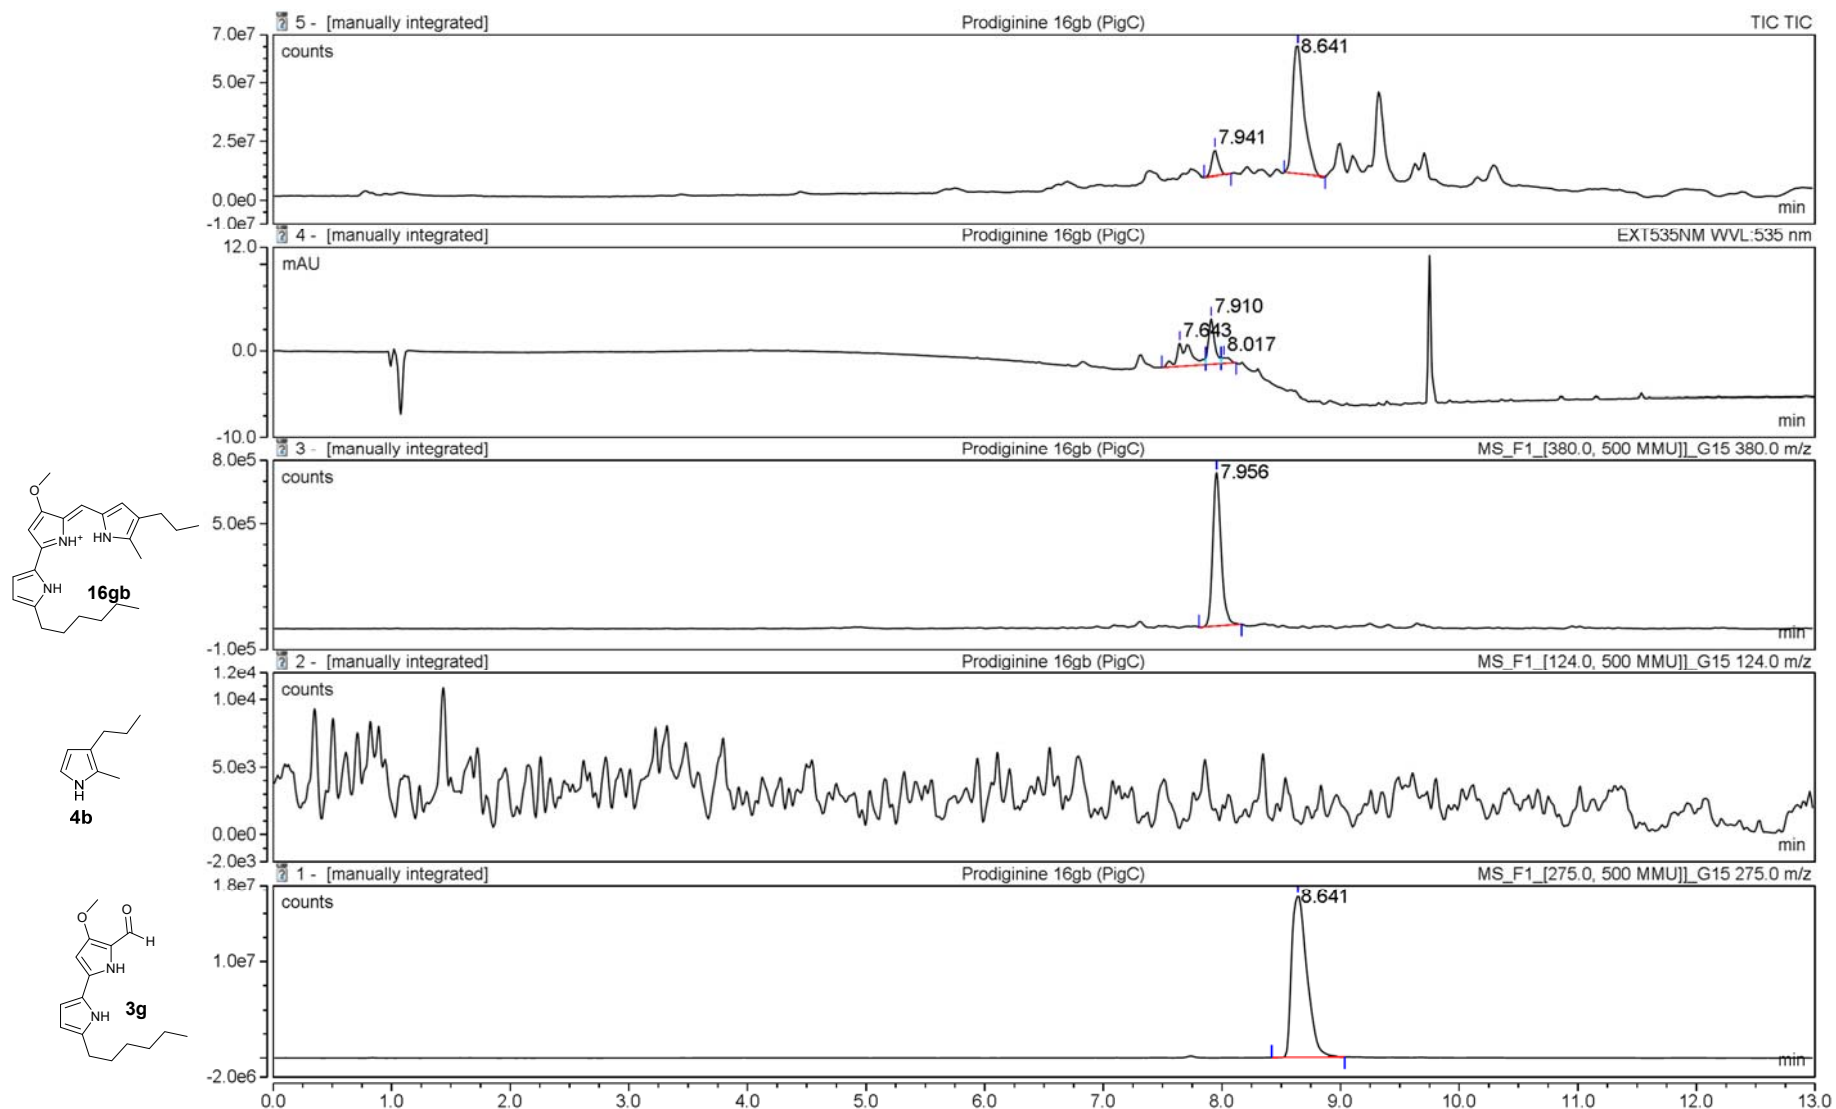

**Figure S76:** LC-MS data [from top to bottom: TIC, UV<sub>535</sub> trace, and EIC of the potential product prodiginine **16gb** (m/z 380.0) and the educts pyrrole **4b** (m/z 124.0) and MBC **3g** (m/z 275.0)] from a representative methanolic reaction extract of the PigC-catalysed condensation reaction between pyrrole **4b** and MBC **3g**. The structures of starting materials and the expected condensation product are shown on the left-hand site besides the corresponding EIC. Retention time of prodiginine **16gb** t<sub>R</sub> 7.91 min.

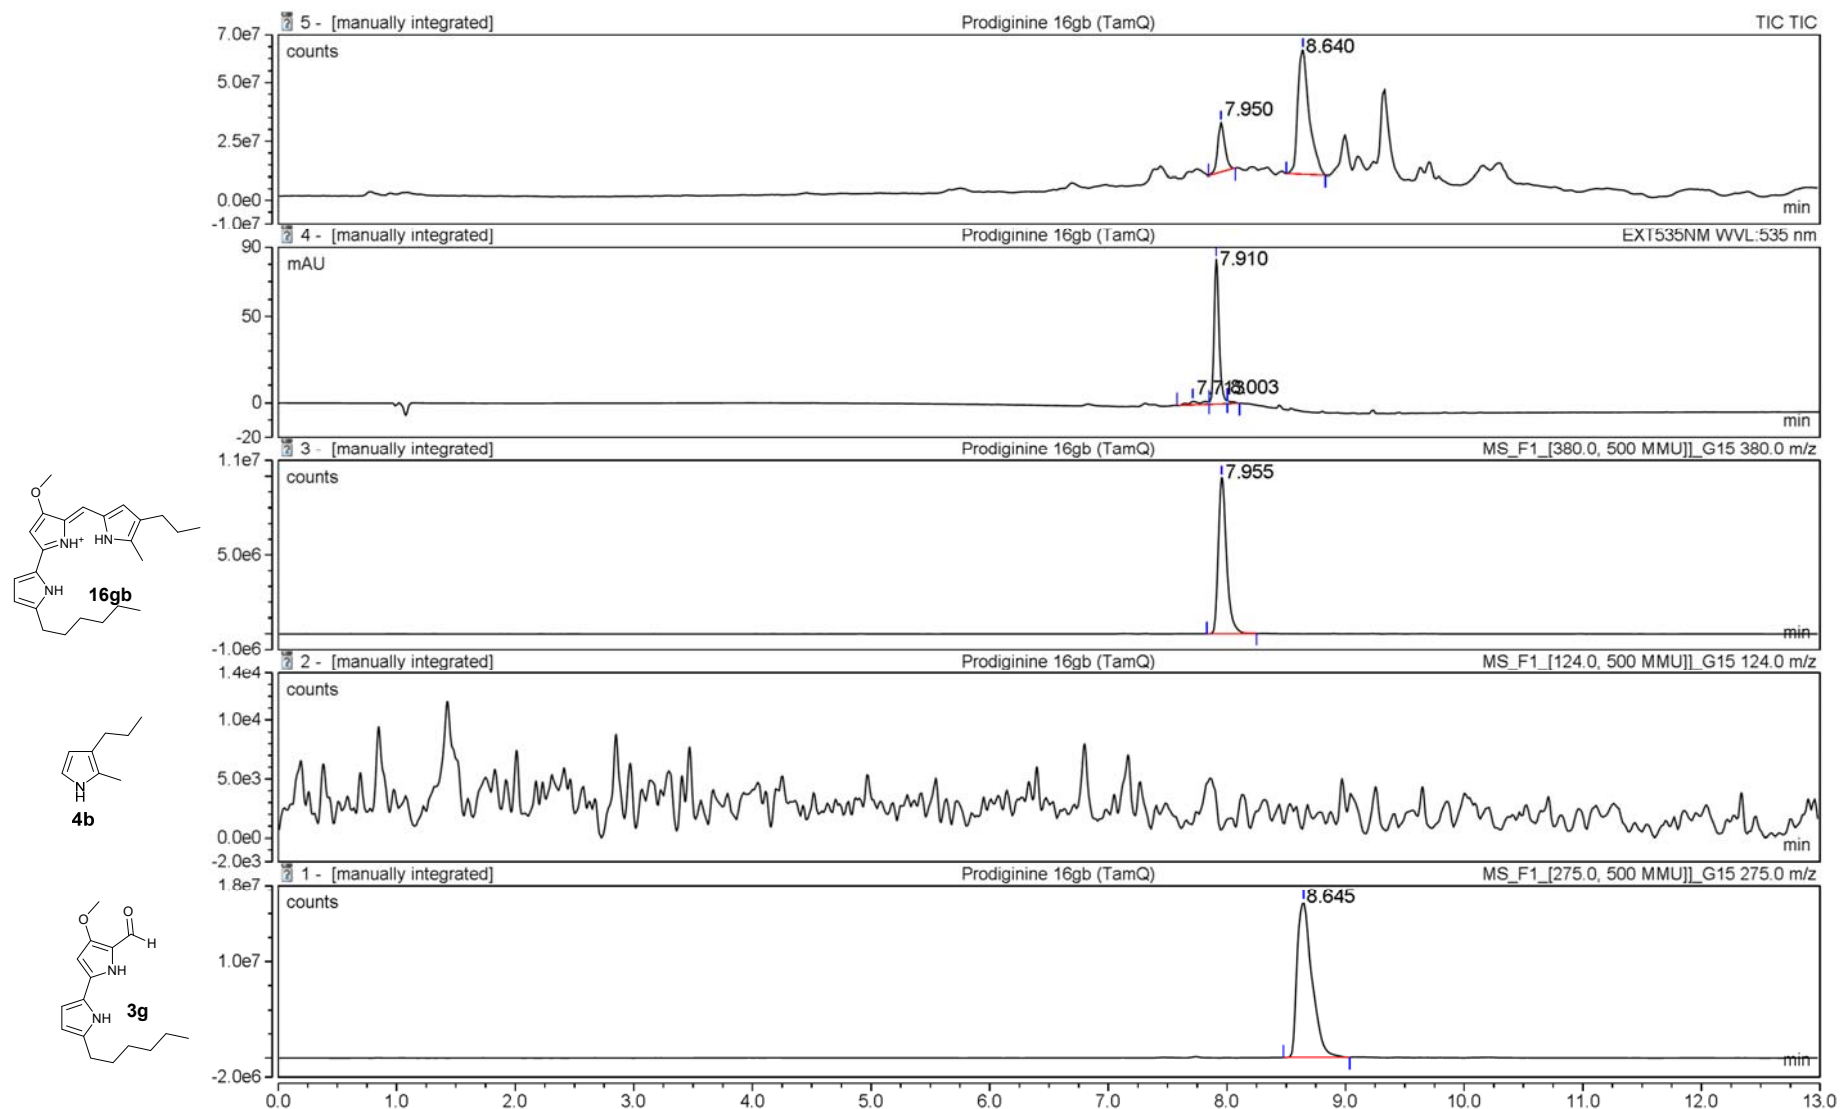

**Figure S77:** LC-MS data [from top to bottom: TIC, UV<sub>535</sub> trace, and EIC of the potential product prodiginine **16gb** (m/z 380.0) and the educts pyrrole **4b** (m/z 124.0) and MBC **3g** (m/z 275.0)] from a representative methanolic reaction extract of the TamQ-catalysed condensation reaction between pyrrole **4b** and MBC **3g**. The structures of starting materials and the expected condensation product are shown on the left-hand side besides the corresponding EIC. Retention time of prodiginine **16gb**  $t_R$  7.91 min.

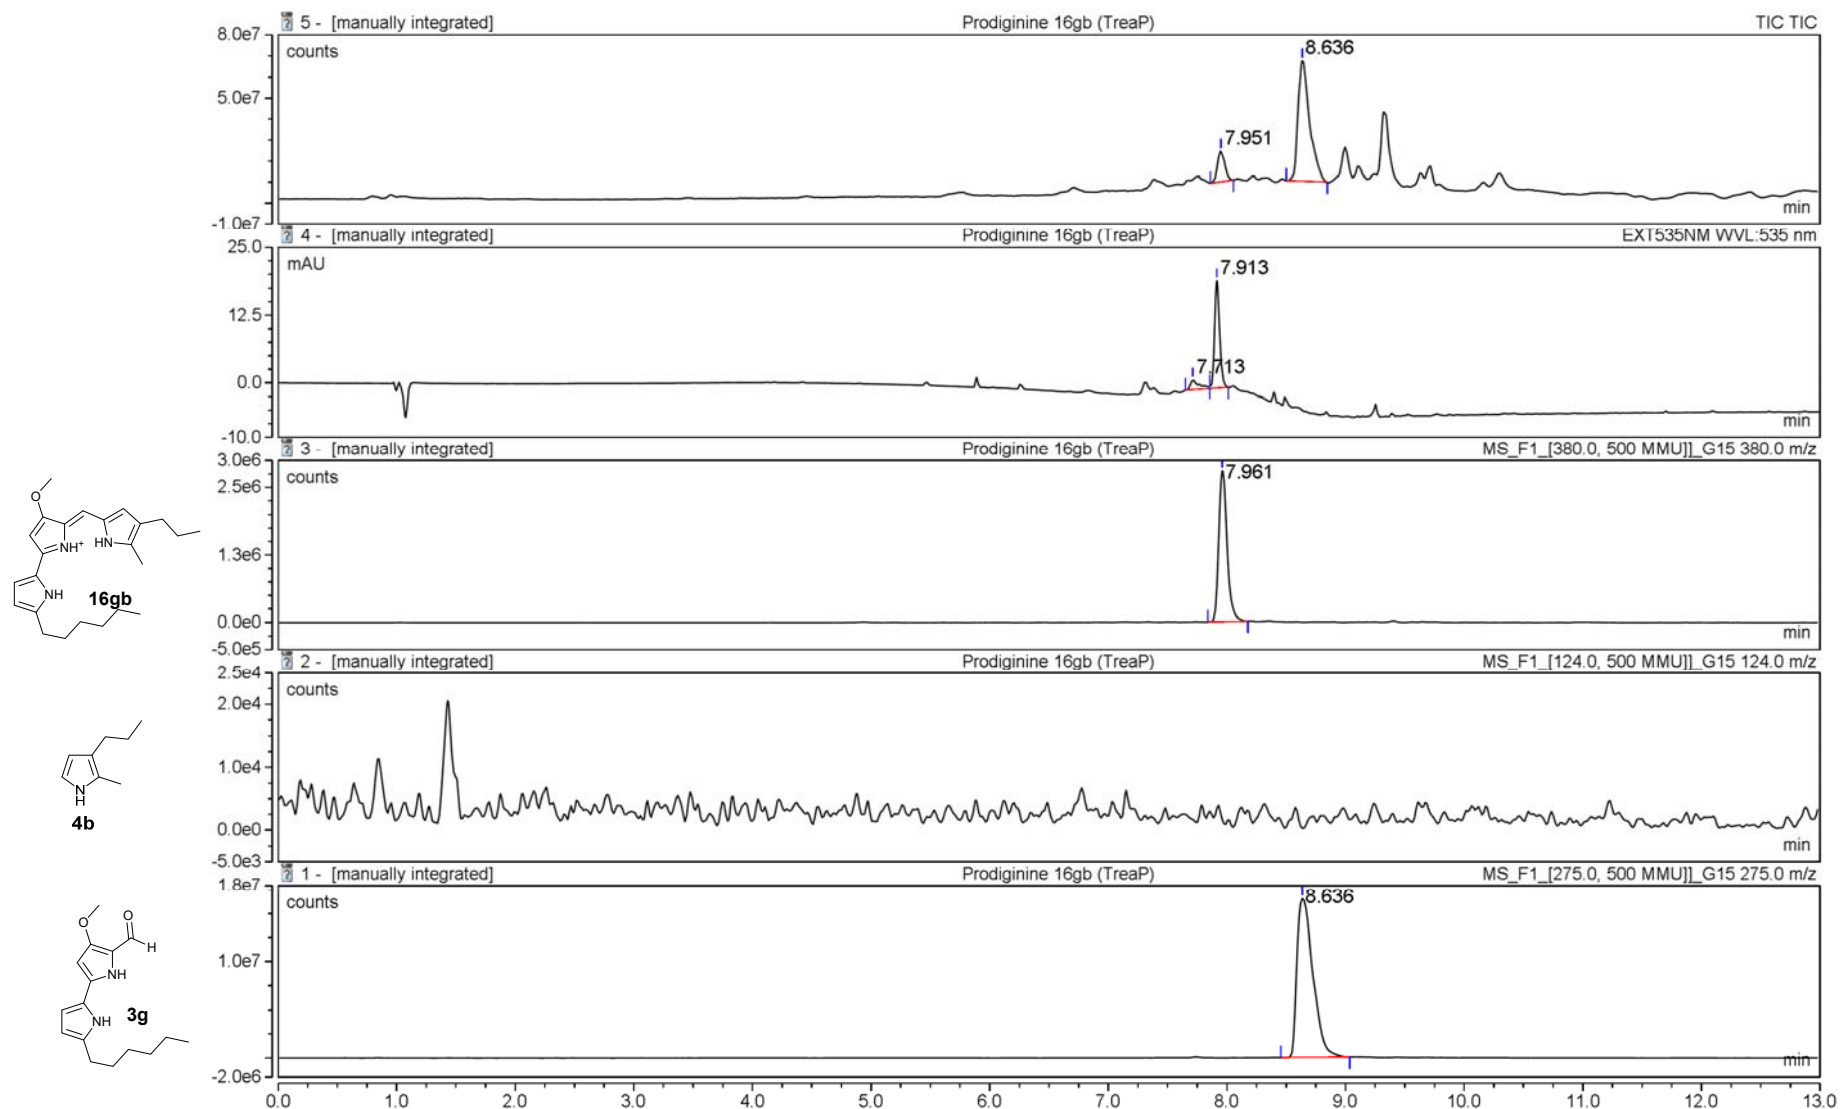

**Figure S78:** LC-MS data [from top to bottom: TIC, UV<sub>535</sub> trace, and EIC of the potential product prodiginine **16gb** (m/z 380.0) and the educts pyrrole **4b** (m/z 124.0) and MBC **3g** (m/z 275.0)] from a representative methanolic reaction extract of the TreaP-catalysed condensation reaction between pyrrole **4b** and MBC **3g**. The structures of starting materials and the expected condensation product are shown on the left-hand site besides the corresponding EIC. Retention time of prodiginine **16gb**  $t_R$  7.91 min.



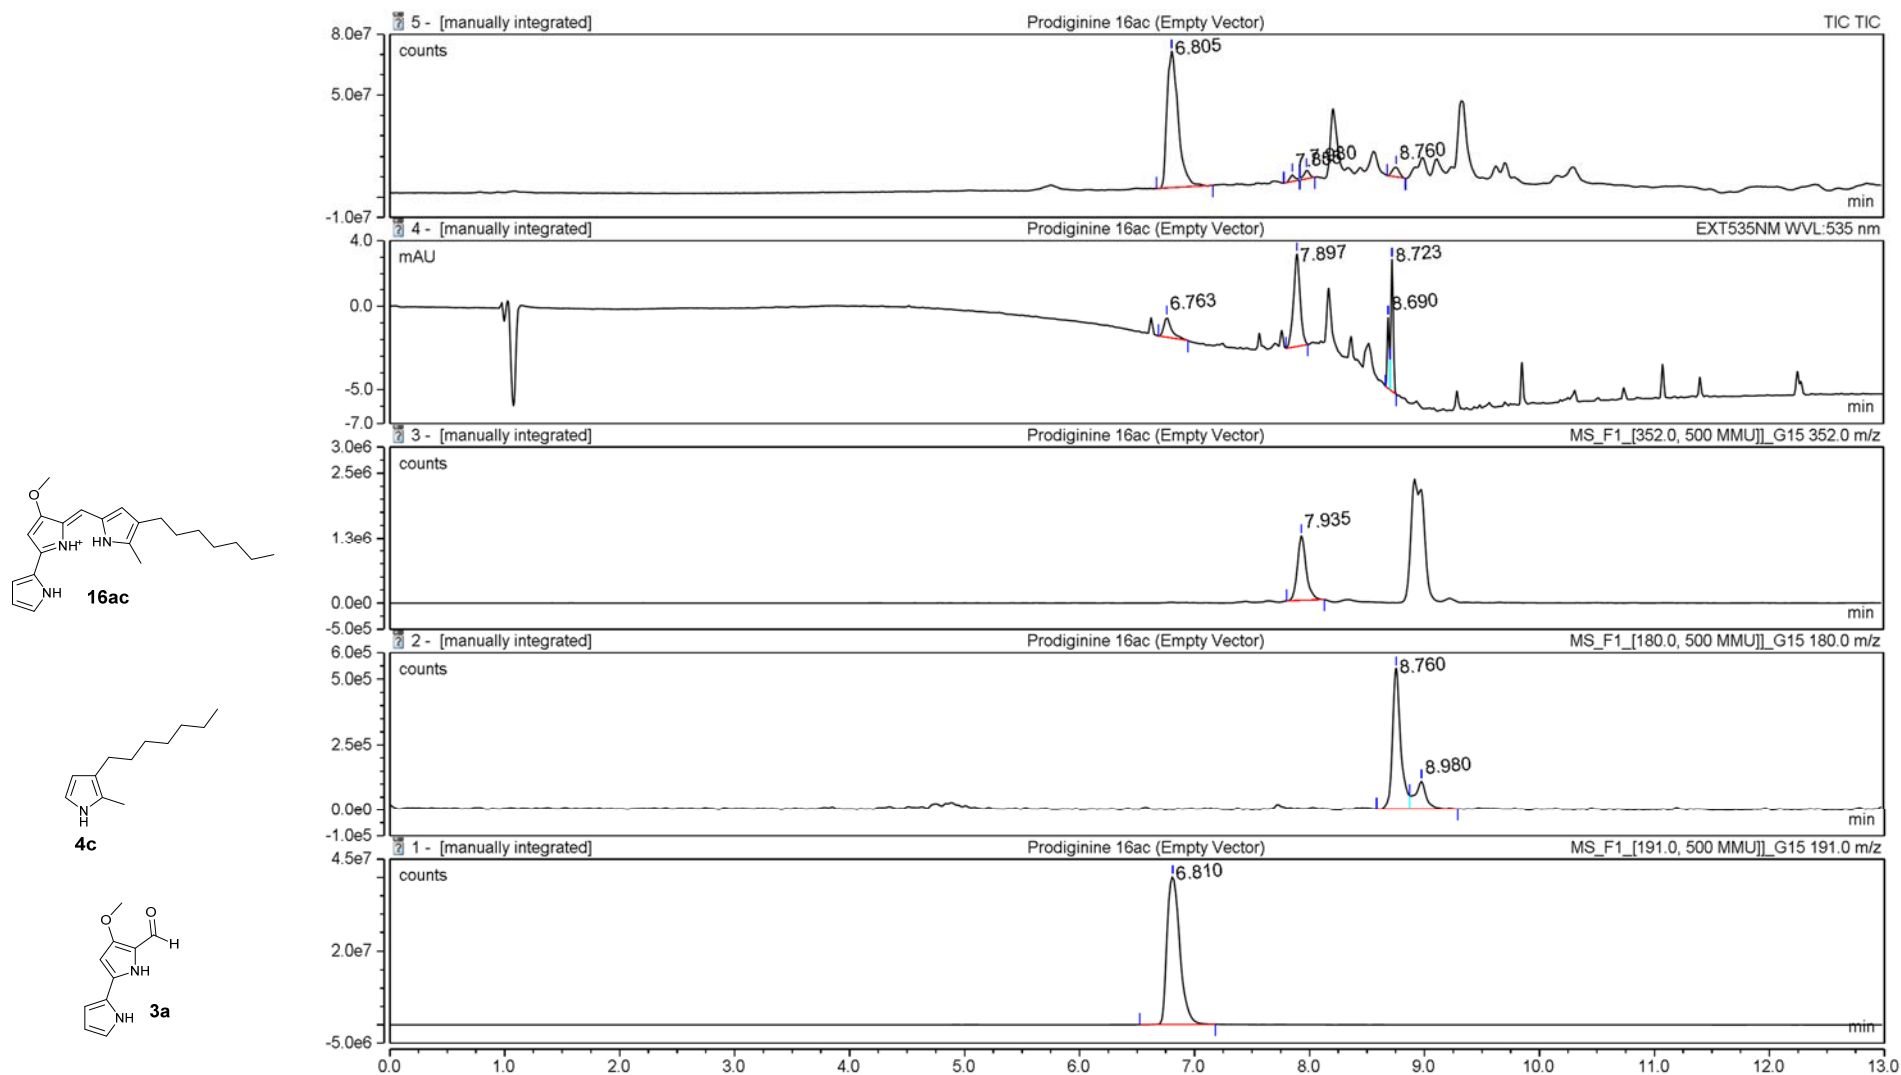

**Figure S79:** LC-MS data [from top to bottom: TIC, UV<sub>535</sub> trace, and extracted ion chromatograms (EIC) of the potential product prodiginine **16ac** ( $m/z$  352.0) and the educts pyrrole **4c** ( $m/z$  191.0) and MBC **3a** ( $m/z$  191.0)] from a representative methanolic reaction extract of the biocatalytic empty vector control reaction between pyrrole **4c** and MBC **3a**. The structures of starting materials and the expected condensation product are shown on the left-hand site besides the corresponding EIC. The small amount of prodiginine **16ac** found in the EIC (middle chromatogram) can be traced back to acid-catalysed condensation between pyrrole and MBC during chromatography with 0.1% formic acid. Integration of the corresponding signal from the UV<sub>535</sub> trace gives an integral of 0 mAU·min.

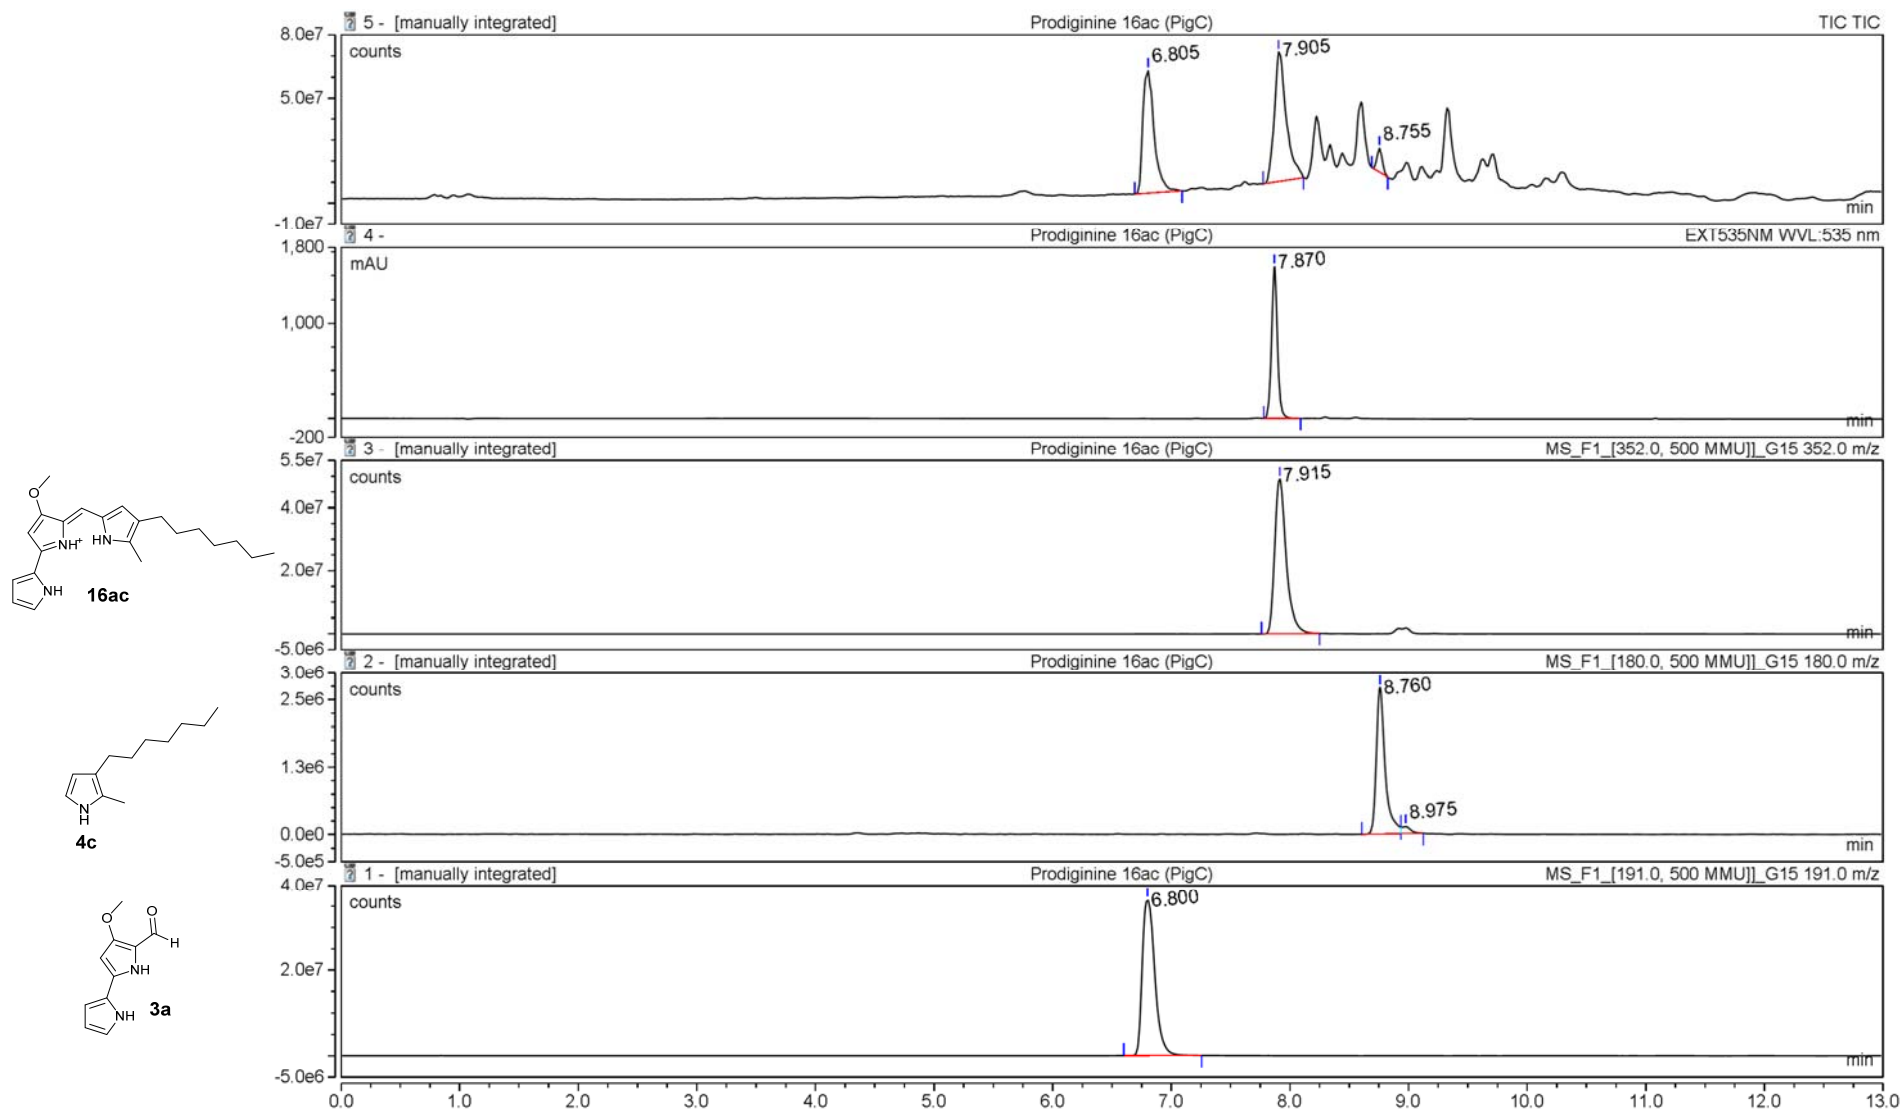

**Figure S80:** LC-MS data [from top to bottom: TIC, UV<sub>335</sub> trace, and EIC of the potential product prodiginine **16ac** (m/z 352.0) and the educts pyrrole **4c** (m/z 191.0) and MBC **3a** (m/z 191.0)] from a representative methanolic reaction extract of the PigC-catalysed condensation reaction between pyrrole **4c** and MBC **3a**. The structures of starting materials and the expected condensation product are shown on the left-hand site besides the corresponding EIC. Retention time of prodiginine **16ac**  $t_R$  7.87 min.

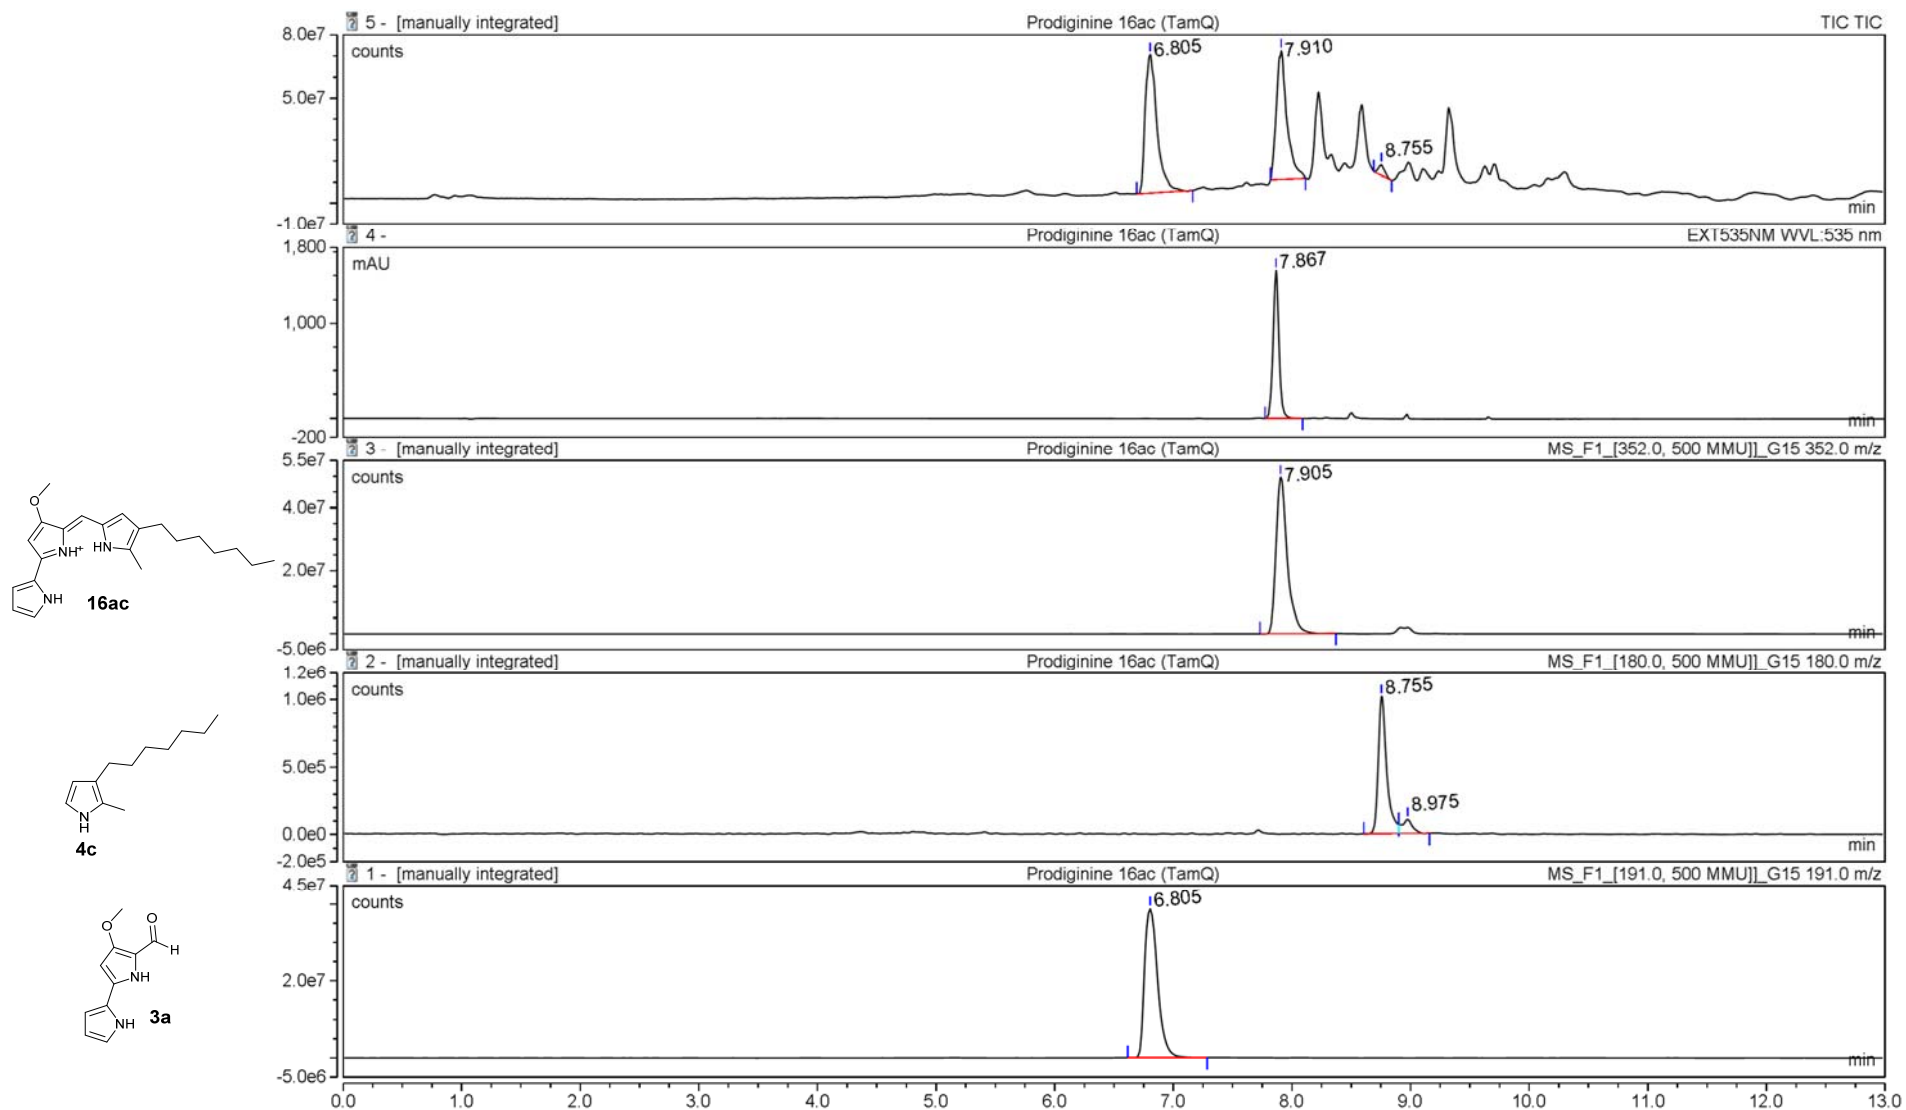

**Figure S81:** LC-MS data [from top to bottom: TIC, UV<sub>535</sub> trace, and EIC of the potential product prodiginine **16ac** (m/z 352.0) and the educts pyrrole **4c** (m/z 191.0) and MBC **3a** (m/z 191.0)] from a representative methanolic reaction extract of the TamQ-catalysed condensation reaction between pyrrole **4c** and MBC **3a**. The structures of starting materials and the expected condensation product are shown on the left-hand site besides the corresponding EIC. Retention time of prodiginine **16ac**  $t_R$  7.87 min.

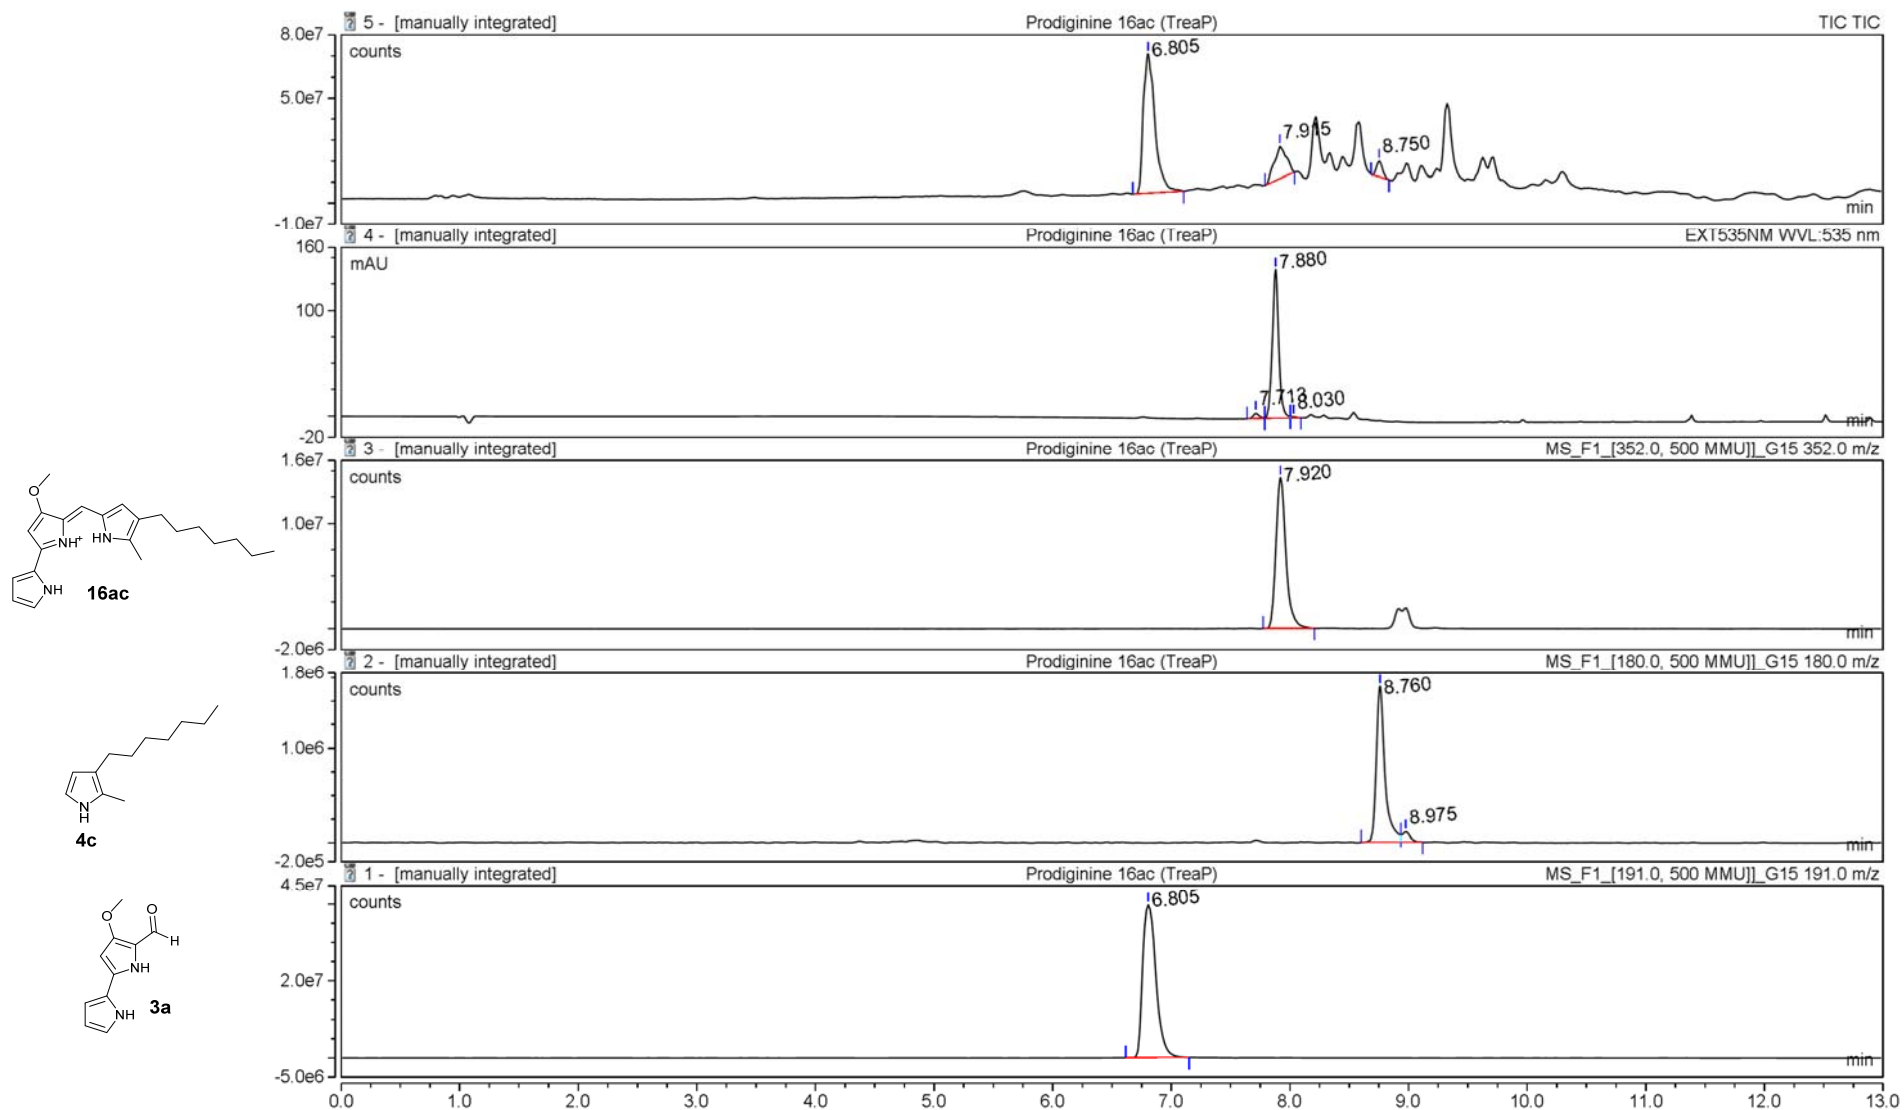

**Figure S82:** LC-MS data [from top to bottom: TIC, UV<sub>355</sub> trace, and EIC of the potential product prodiginine **16ac** (m/z 352.0) and the educts pyrrole **4c** (m/z 191.0) and MBC **3a** (m/z 191.0)] from a representative methanolic reaction extract of the TreaP-catalysed condensation reaction between pyrrole **4c** and MBC **3a**. The structures of starting materials and the expected condensation product are shown on the left-hand site besides the corresponding EIC. Retention time of prodiginine **16ac**  $t_R$  7.88 min.

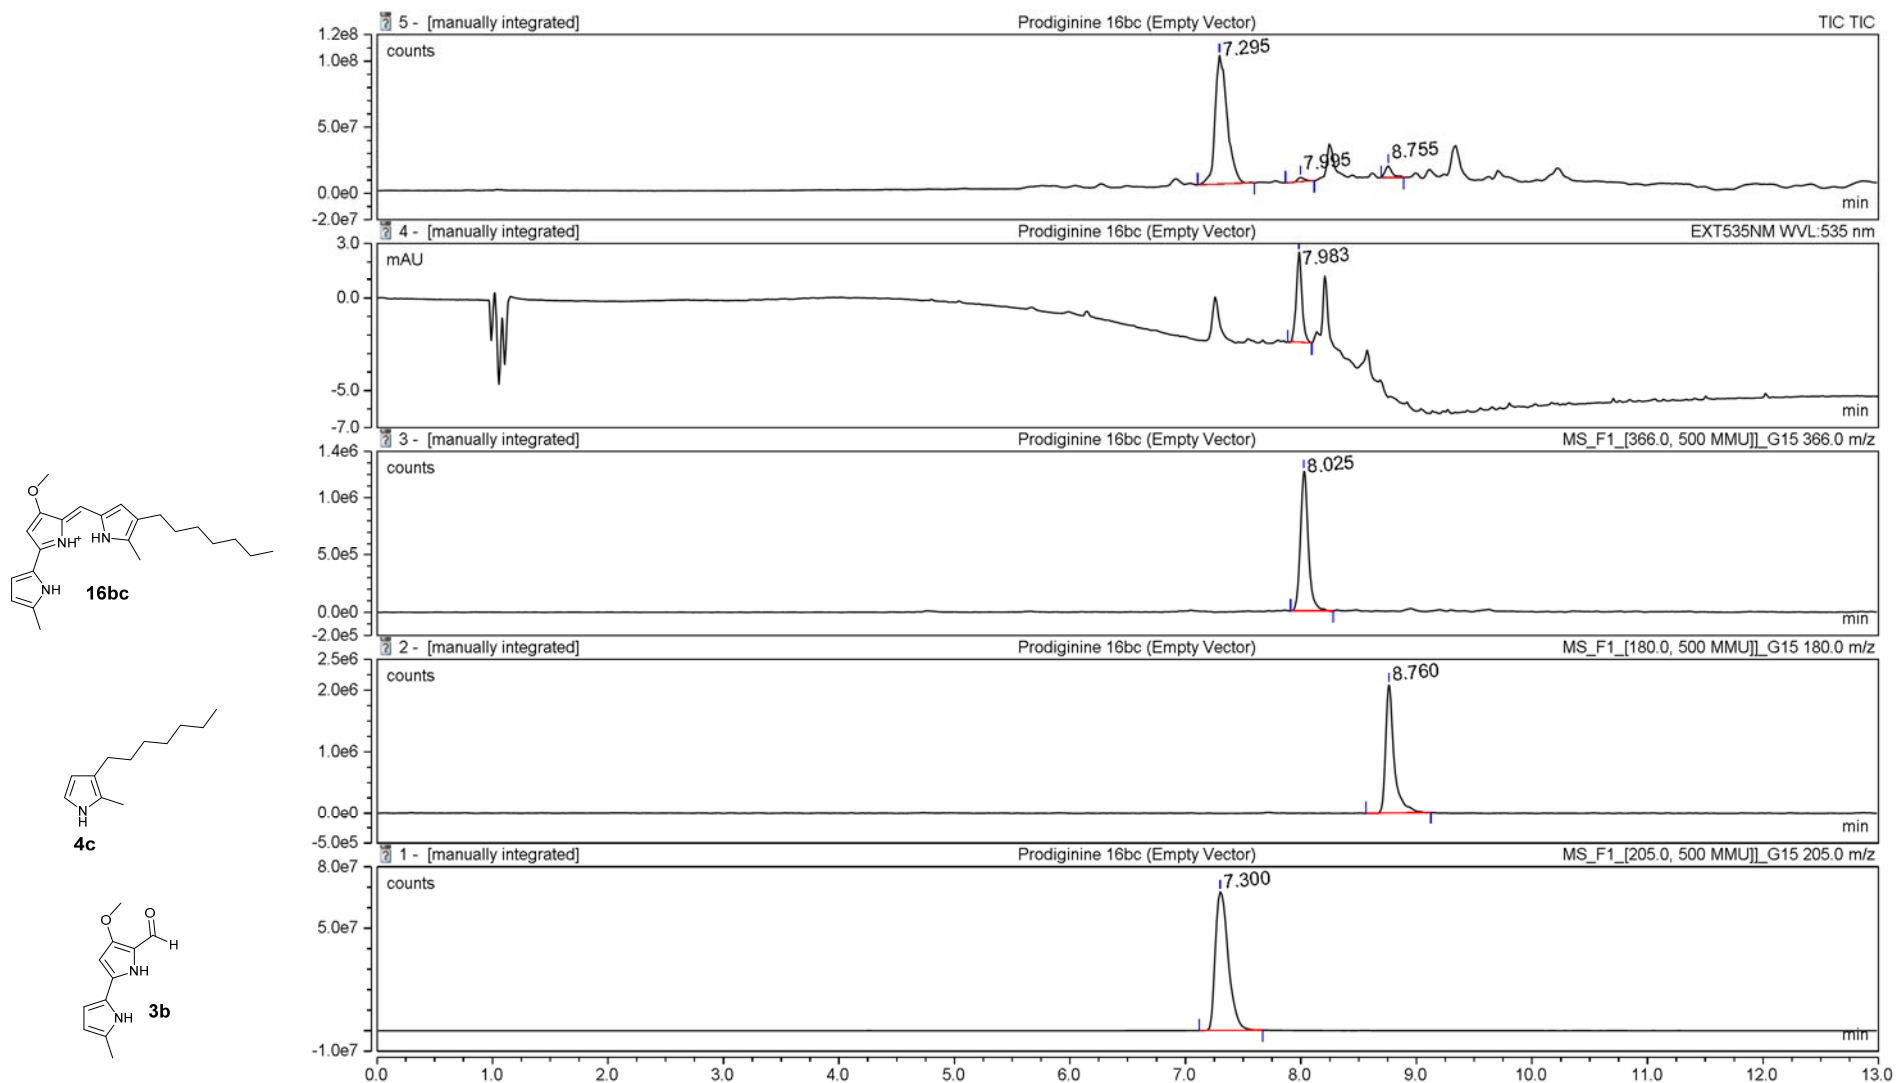

**Figure S83:** LC-MS data [from top to bottom: TIC, UV<sub>535</sub> trace, and extracted ion chromatograms (EIC) of the potential product prodigiosin **16bc** (m/z 366.0) and the educts pyrrole **4c** (m/z 180.0) and MBC **3b** (m/z 205.0)] from a representative methanolic reaction extract of the biocatalytic empty vector control reaction between pyrrole **4c** and MBC **3b**. The structures of starting materials and the expected condensation product are shown on the left-hand site besides the corresponding EIC. The small amount of prodigiosin **16bc** found in the EIC (middle chromatogram) can be traced back to acid-catalysed condensation between pyrrole and MBC during chromatography with 0.1% formic acid. Integration of the corresponding signal from the UV<sub>535</sub> trace gives an integral of 0 mAU·min.

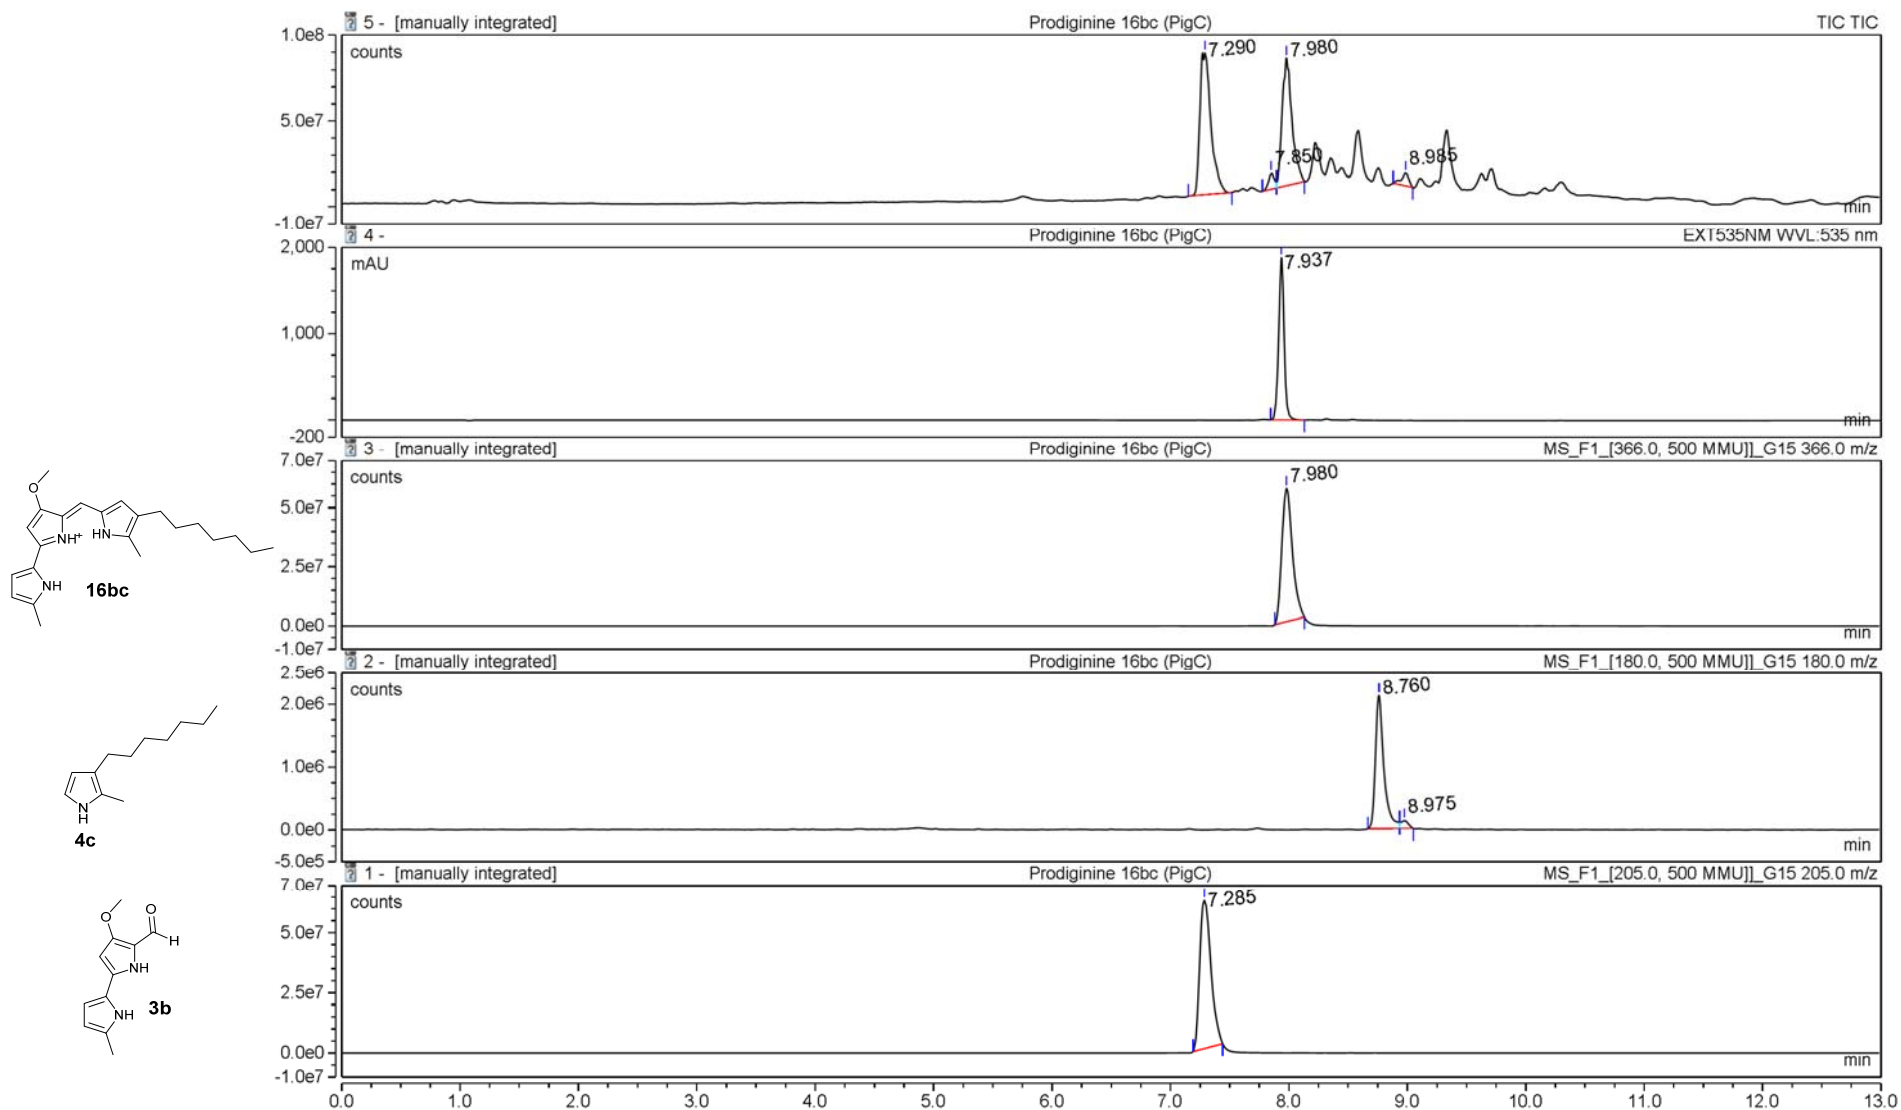

**Figure S84:** LC-MS data [from top to bottom: TIC, UV<sub>335</sub> trace, and EIC of the potential product prodiginine **16bc** (m/z 366.0) and the educts pyrrole **4c** (m/z 191.0) and MBC **3b** (m/z 205.0)] from a representative methanolic reaction extract of the PigC-catalysed condensation reaction between pyrrole **4c** and MBC **3b**. The structures of starting materials and the expected condensation product are shown on the left-hand site besides the corresponding EIC. Retention time of prodiginine **16bc**  $t_R$  7.94 min.

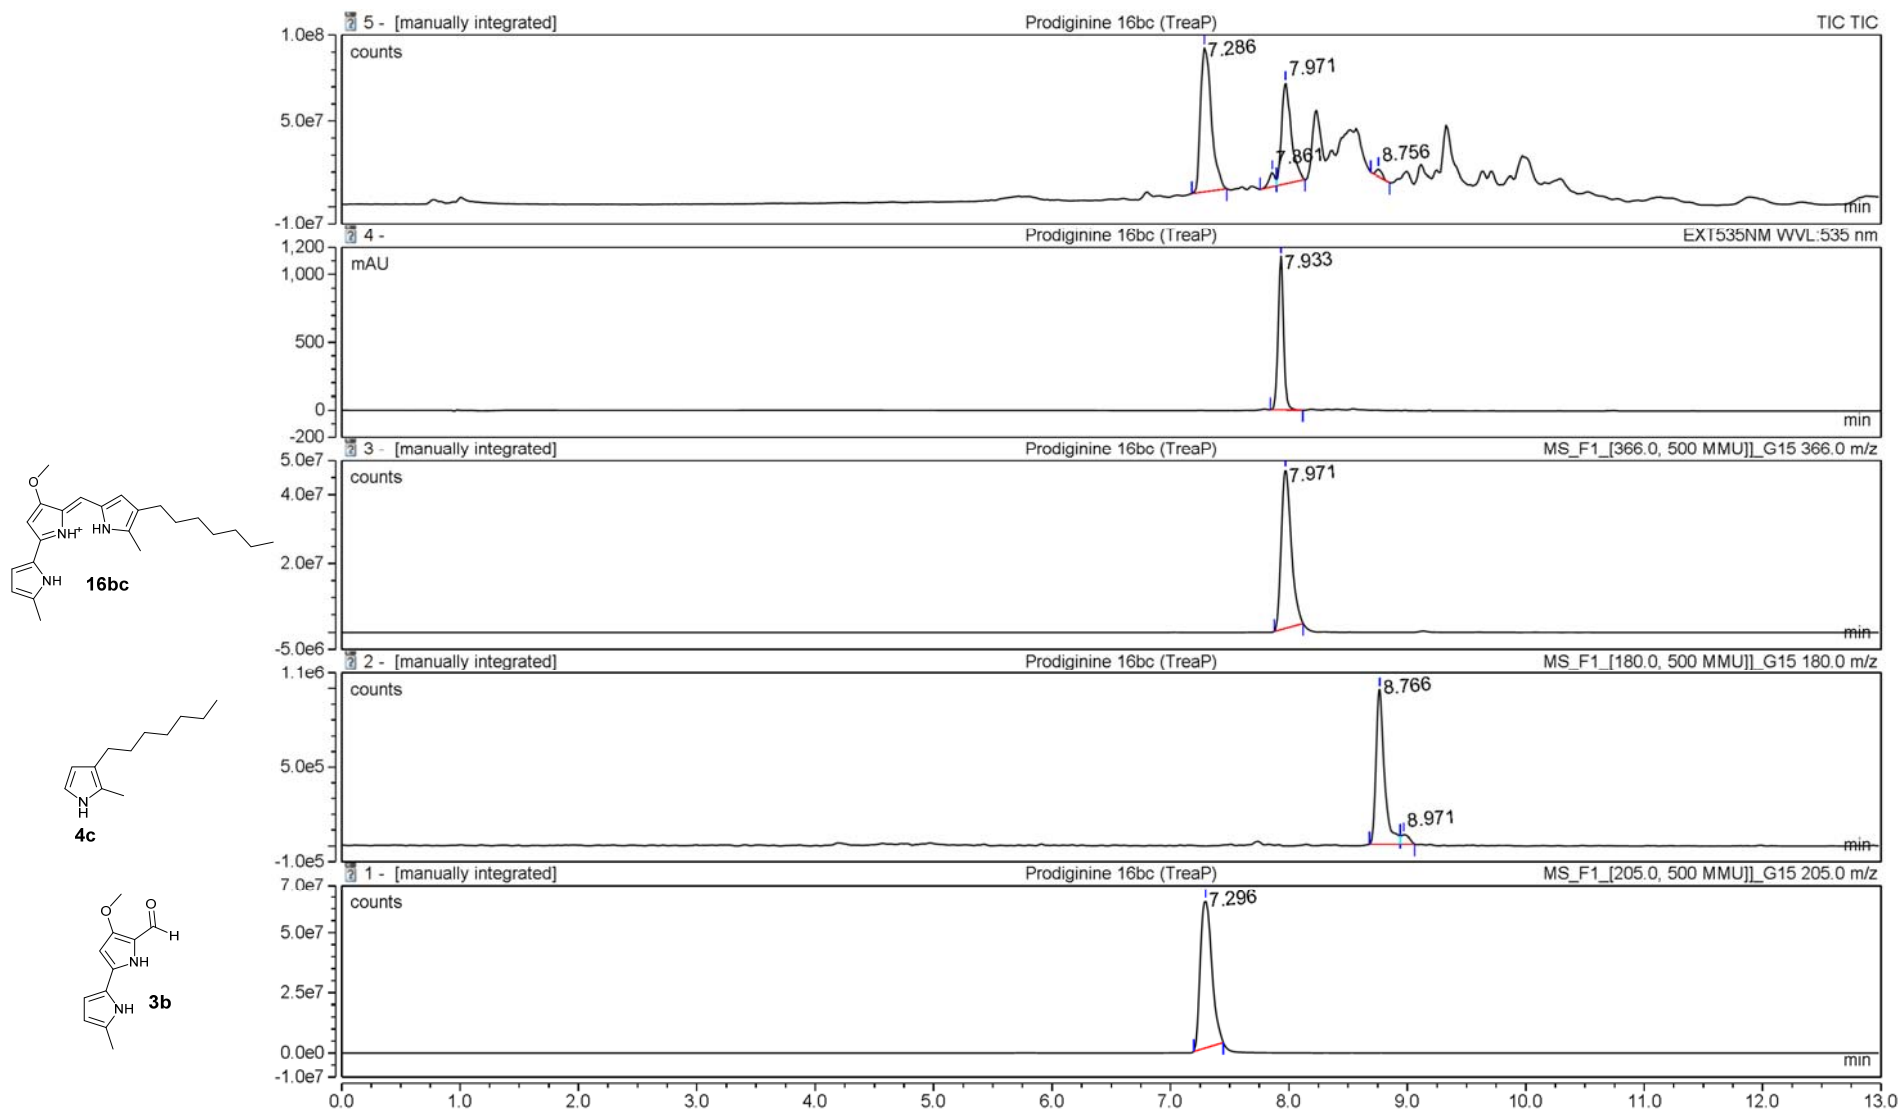

**Figure S85:** LC-MS data [from top to bottom: TIC, UV<sub>535</sub> trace, and EIC of the potential product prodiginine **16bc** (m/z 366.0) and the educts pyrrole **4c** (m/z 191.0) and MBC **3b** (m/z 205.0)] from a representative methanolic reaction extract of the TamQ-catalysed condensation reaction between pyrrole **4c** and MBC **3b**. The structures of starting materials and the expected condensation product are shown on the left-hand site besides the corresponding EIC. Retention time of prodiginine **16bc**  $t_R$  7.93 min.

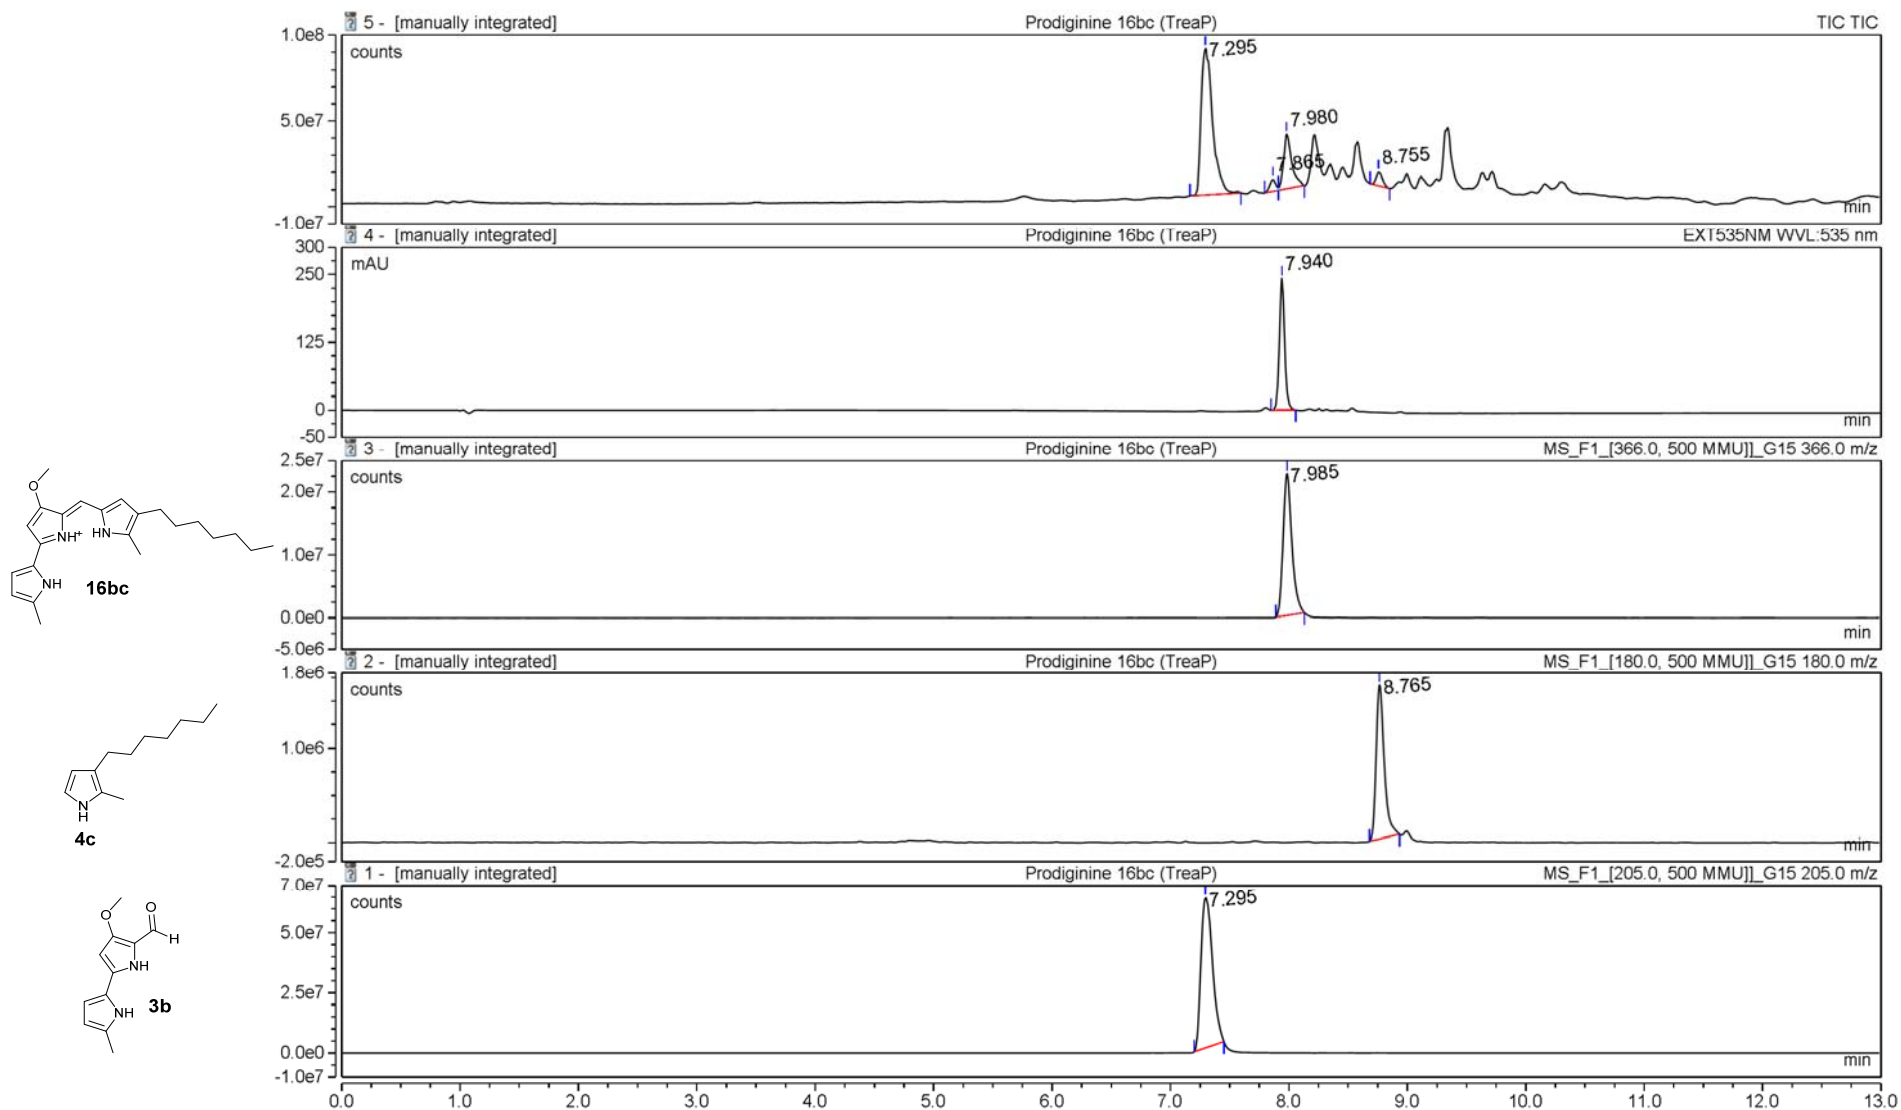

**Figure S86:** LC-MS data [from top to bottom: TIC, UV<sub>535</sub> trace, and EIC of the potential product prodiginine **16bc** (m/z 366.0) and the educts pyrrole **4c** (m/z 191.0) and MBC **3b** (m/z 205.0)] from a representative methanolic reaction extract of the TreaP-catalysed condensation reaction between pyrrole **4c** and MBC **3b**. The structures of starting materials and the expected condensation product are shown on the left-hand site besides the corresponding EIC. Retention time of prodiginine **16bc**  $t_R$  7.94 min.



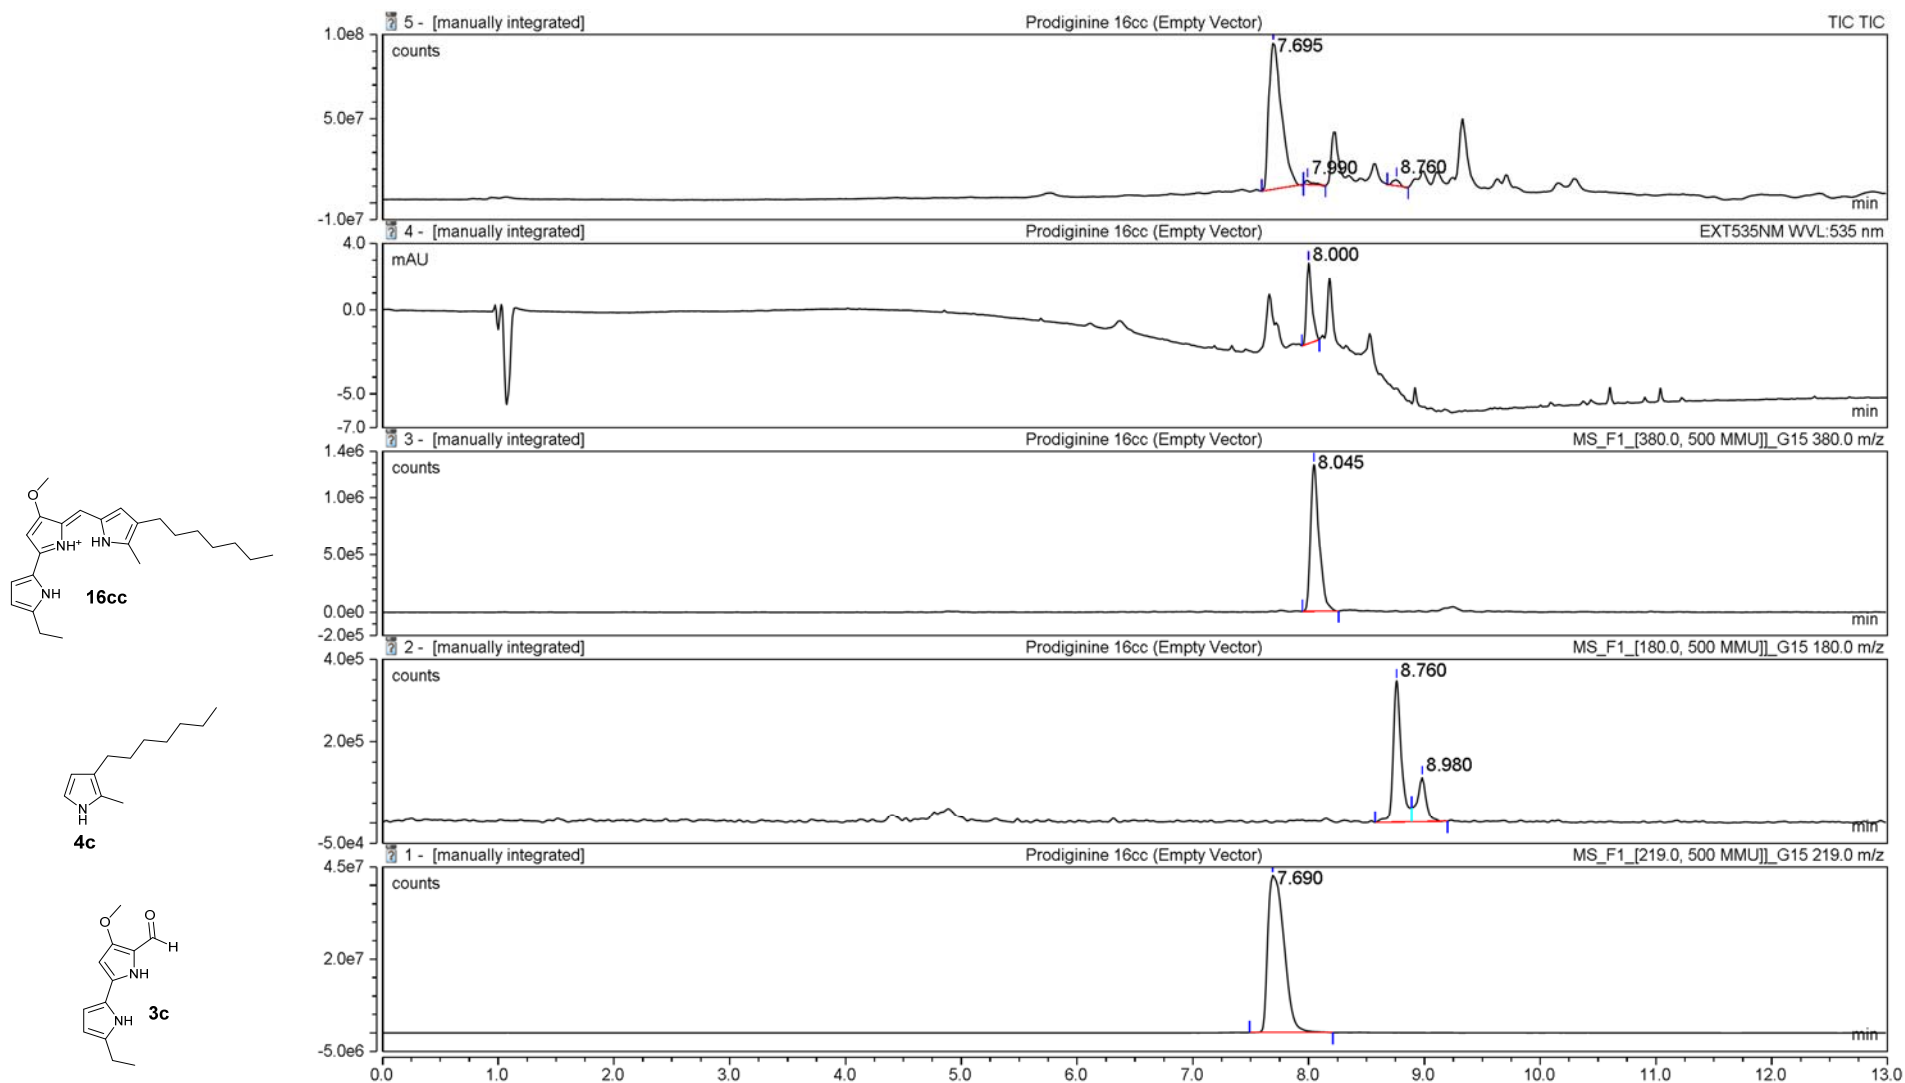

**Figure S87:** LC-MS data [from top to bottom: TIC, UV<sub>535</sub> trace, and extracted ion chromatograms (EIC) of the potential product prodiginosin **16cc** ( $m/z$  380.0) and the educts pyrrole **4c** ( $m/z$  180.0) and MBC **3c** ( $m/z$  219.0)] from a representative methanolic reaction extract of the biocatalytic empty vector control reaction between pyrrole **4c** and MBC **3c**. The structures of starting materials and the expected condensation product are shown on the left-hand site besides the corresponding EIC. The small amount of prodiginosin **16cc** found in the EIC (middle chromatogram) can be traced back to acid-catalysed condensation between pyrrole and MBC during chromatography with 0.1% formic acid. Integration of the corresponding signal from the UV<sub>535</sub> trace gives an integral of 0 mAU·min.

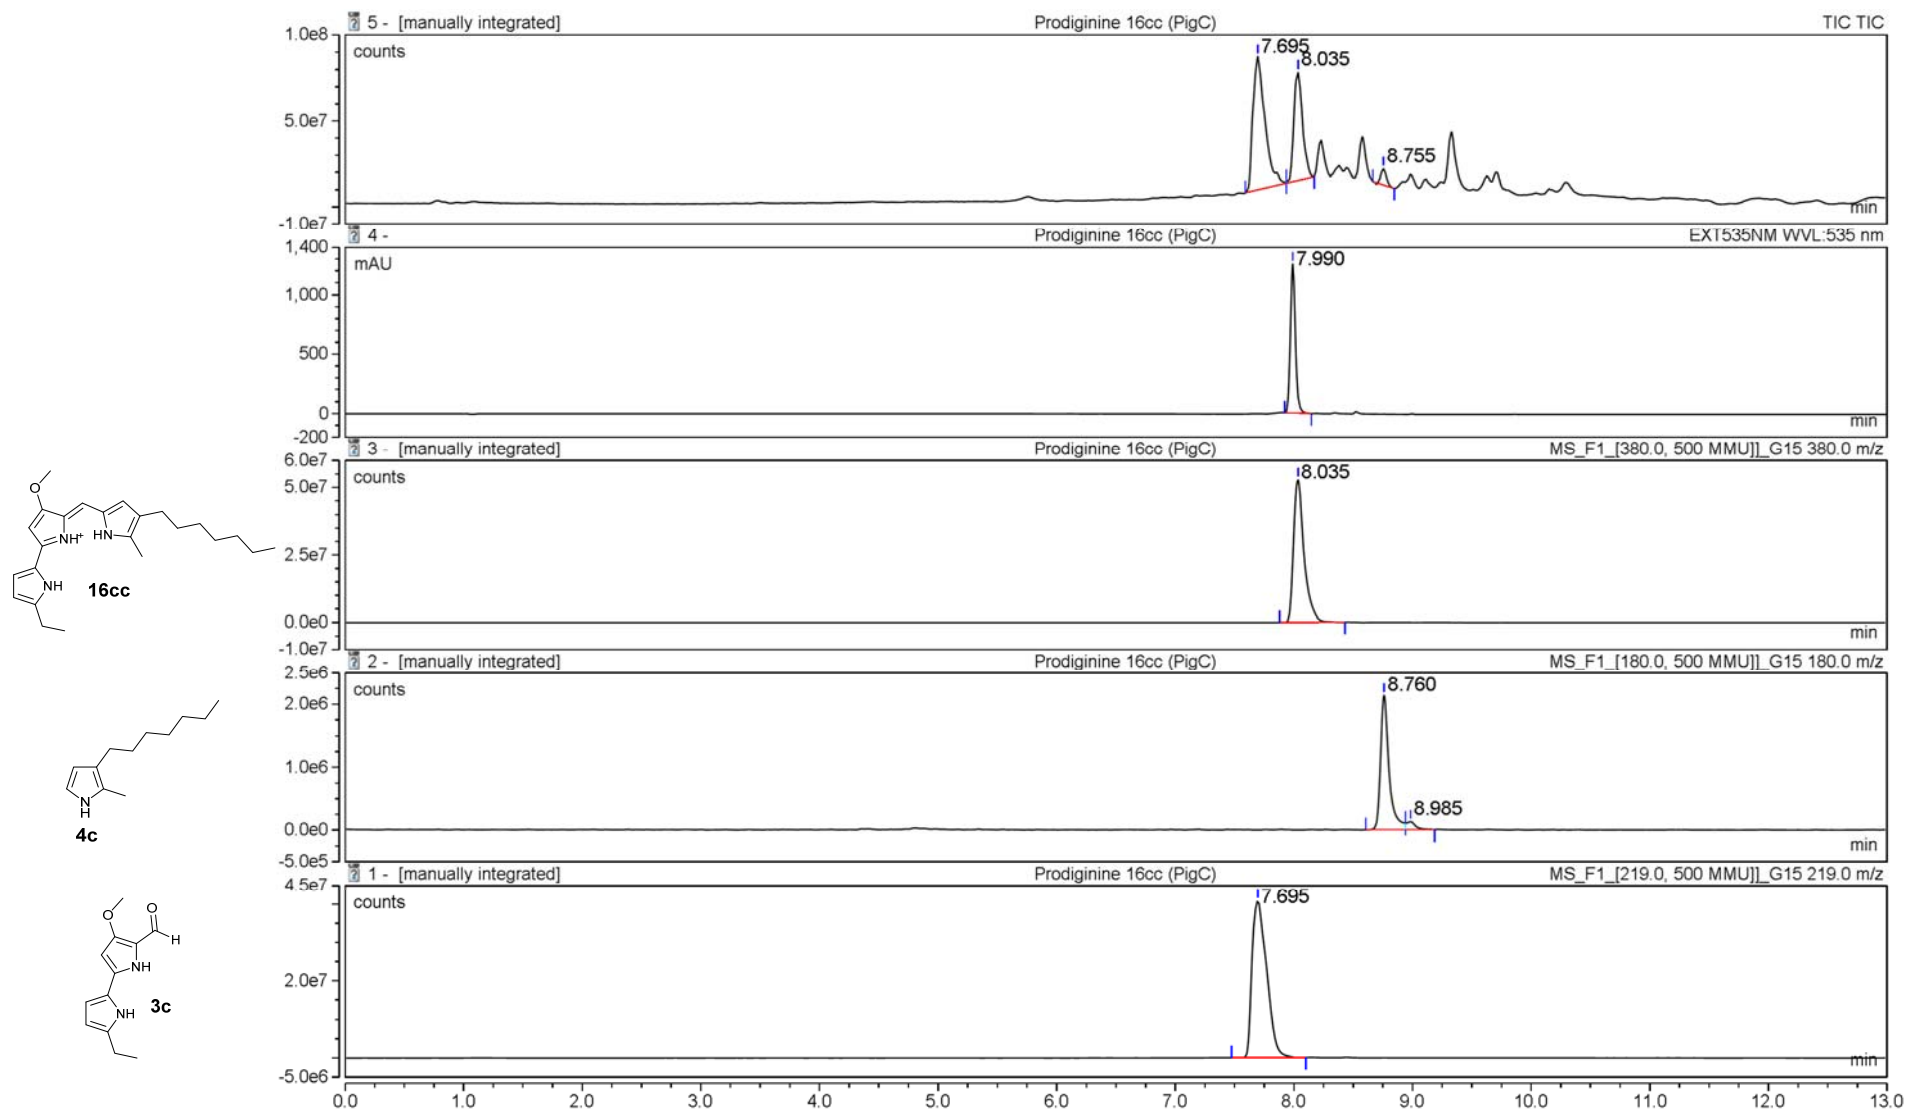

**Figure S88:** LC-MS data [from top to bottom: TIC, UV<sub>535</sub> trace, and EIC of the potential product prodiginine **16cc** (m/z 380.0) and the educts pyrrole **4c** (m/z 191.0) and MBC **3c** (m/z 219.0)] from a representative methanolic reaction extract of the PigC-catalysed condensation reaction between pyrrole **4c** and MBC **3c**. The structures of starting materials and the expected condensation product are shown on the left-hand site besides the corresponding EIC. Retention time of prodiginine **16cc**  $t_R$  7.99 min.

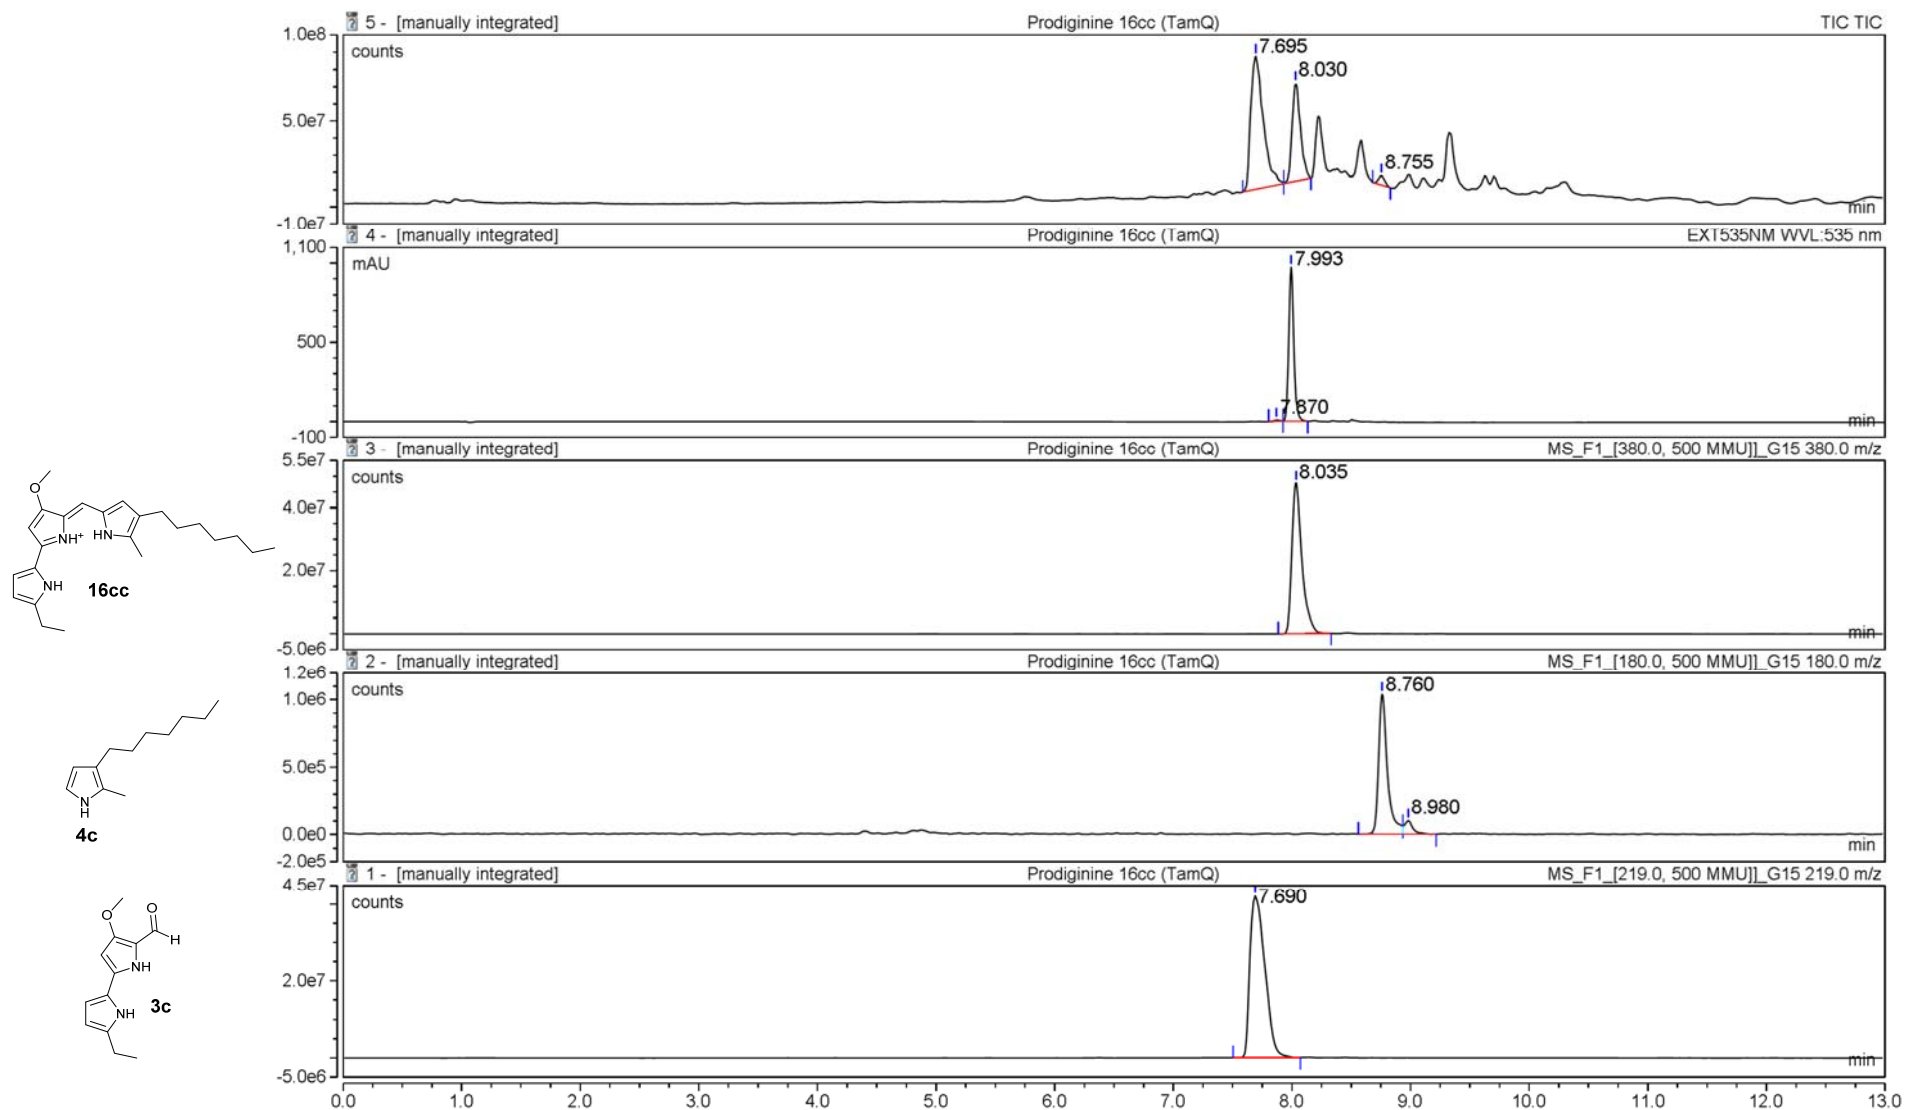

**Figure S89:** LC-MS data [from top to bottom: TIC, UV<sub>535</sub> trace, and EIC of the potential product prodiginine **16cc** (m/z 380.0) and the educts pyrrole **4c** (m/z 191.0) and MBC **3c** (m/z 219.0)] from a representative methanolic reaction extract of the TamQ-catalysed condensation reaction between pyrrole **4c** and MBC **3c**. The structures of starting materials and the expected condensation product are shown on the left-hand site besides the corresponding EIC. Retention time of prodiginine **16cc**  $t_R$  7.99 min.

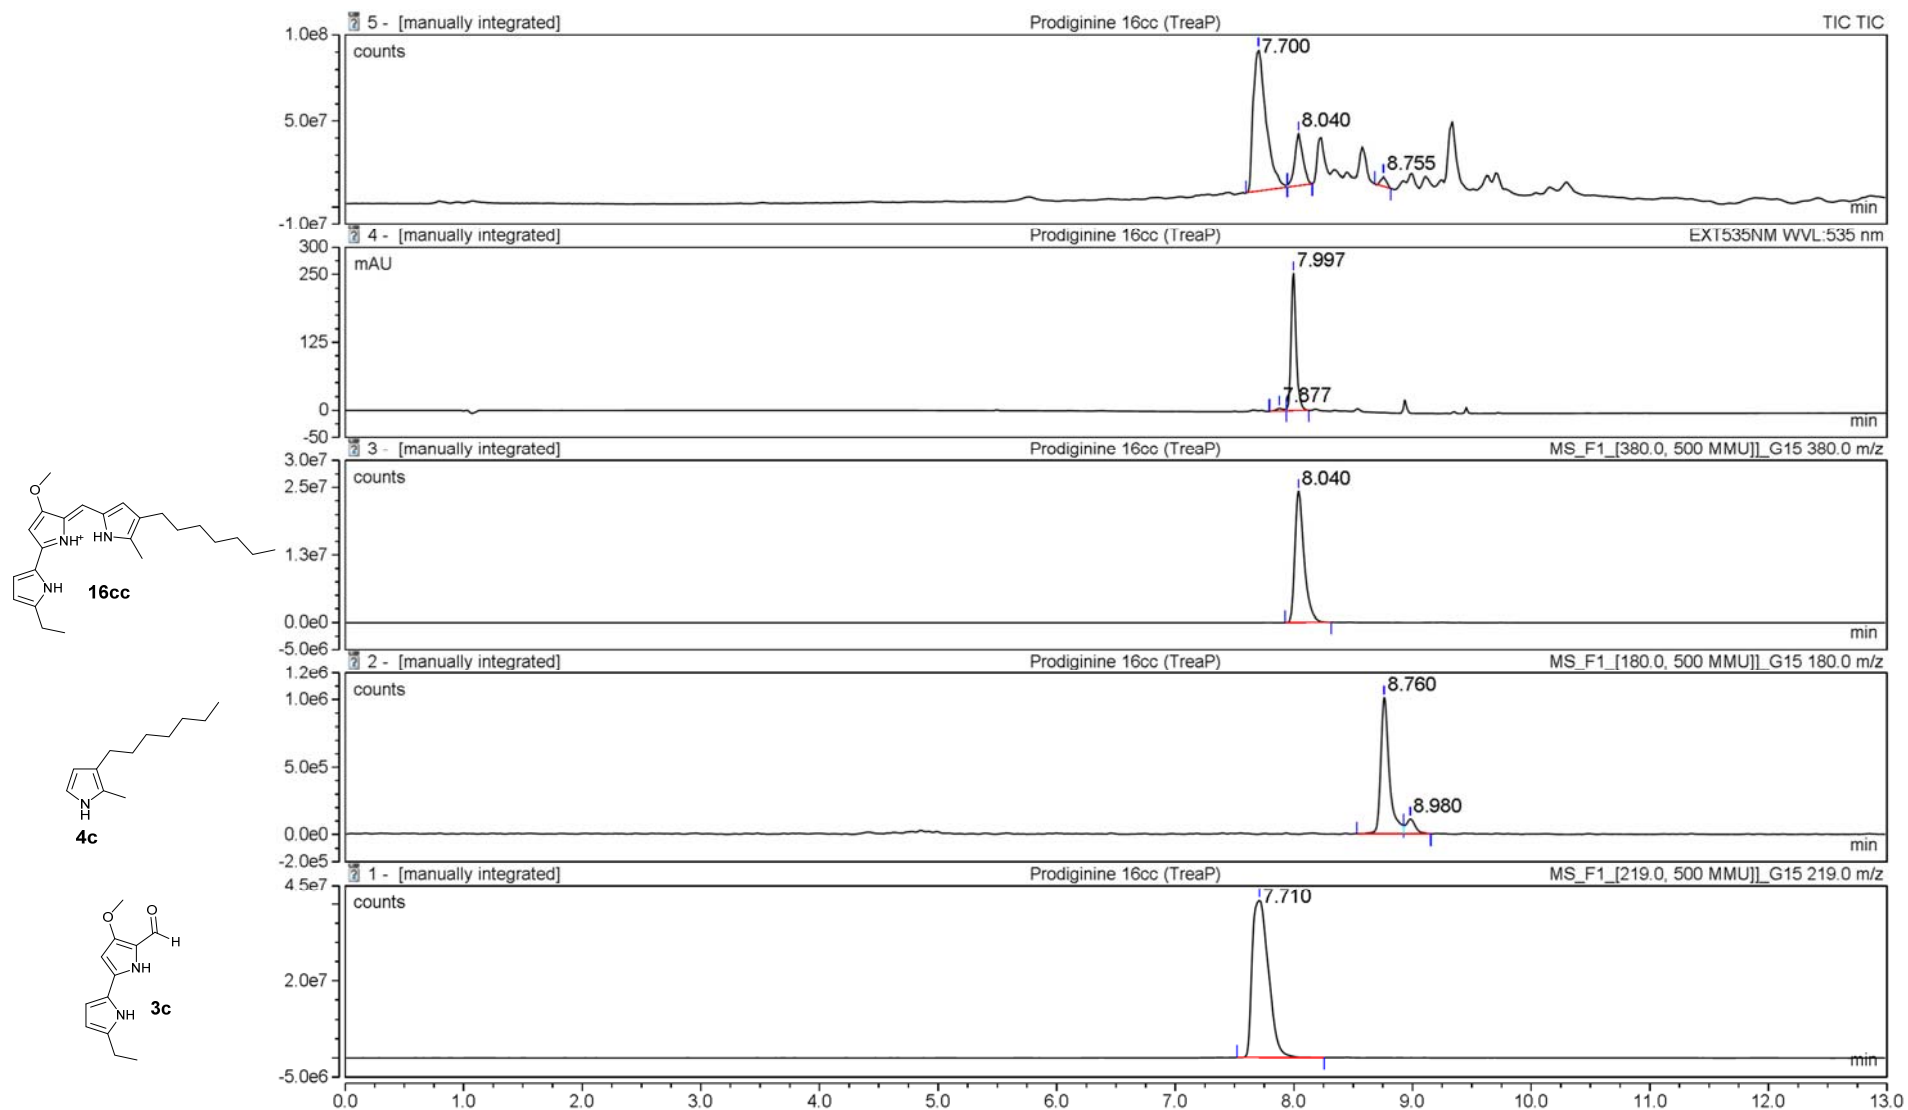

**Figure S90:** LC-MS data [from top to bottom: TIC, UV<sub>535</sub> trace, and EIC of the potential product prodiginine **16cc** (m/z 380.0) and the educts pyrrole **4c** (m/z 180.0) and MBC **3c** (m/z 219.0)] from a representative methanolic reaction extract of the TreaP-catalysed condensation reaction between pyrrole **4c** and MBC **3c**. The structures of starting materials and the expected condensation product are shown on the left-hand site besides the corresponding EIC. Retention time of prodiginine **16cc**  $t_R$  8.00 min.

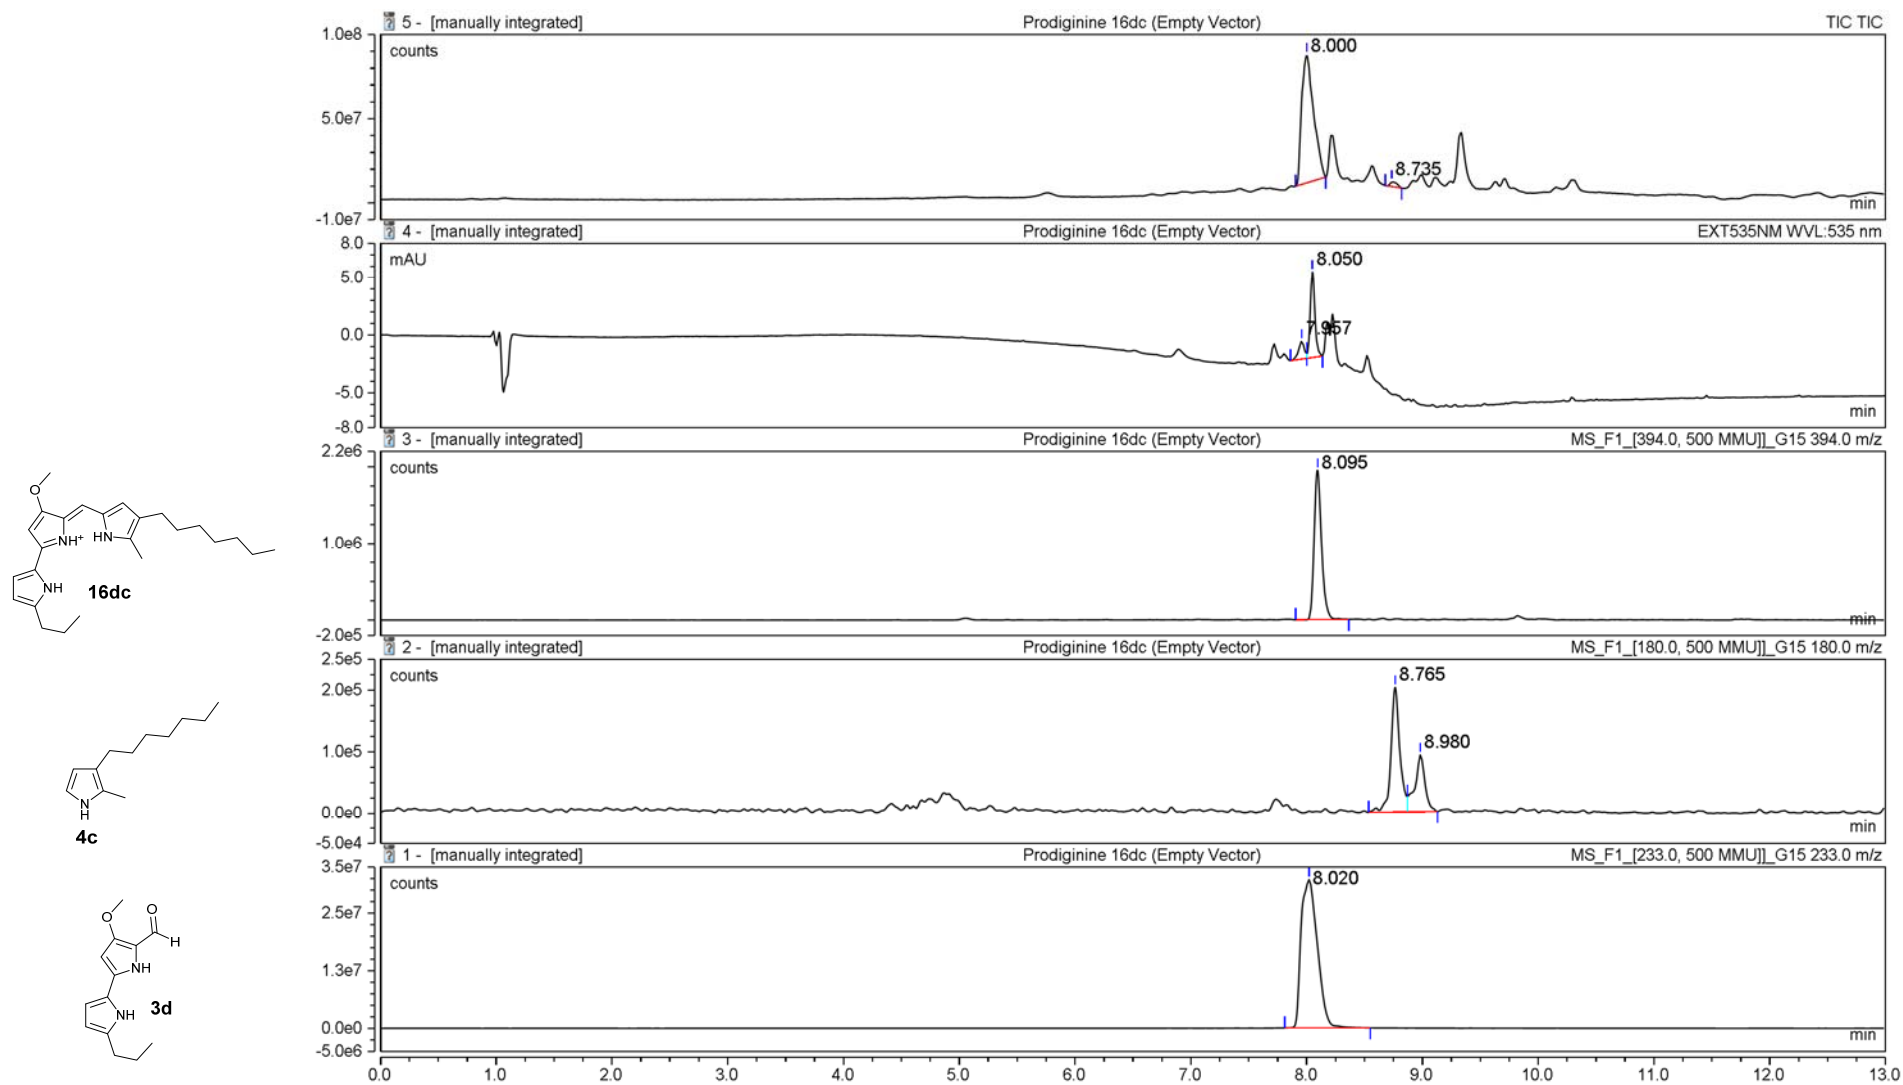

**Figure S91:** LC-MS data [from top to bottom: TIC, UV<sub>535</sub> trace, and extracted ion chromatograms (EIC) of the potential product prodigiosin **16dc** (m/z 394.0) and the educts pyrrole **4c** (m/z 180.0) and MBC **3d** (m/z 233.0)] from a representative methanolic reaction extract of the biocatalytic empty vector control reaction between pyrrole **4c** and MBC **3d**. The structures of starting materials and the expected condensation product are shown on the left-hand site besides the corresponding EIC. The small amount of prodigiosin **16dc** found in the EIC (middle chromatogram) can be traced back to acid-catalysed condensation between pyrrole and MBC during chromatography with 0.1% formic acid. Integration of the corresponding signal from the UV<sub>535</sub> trace gives an integral of 0 mAU·min.

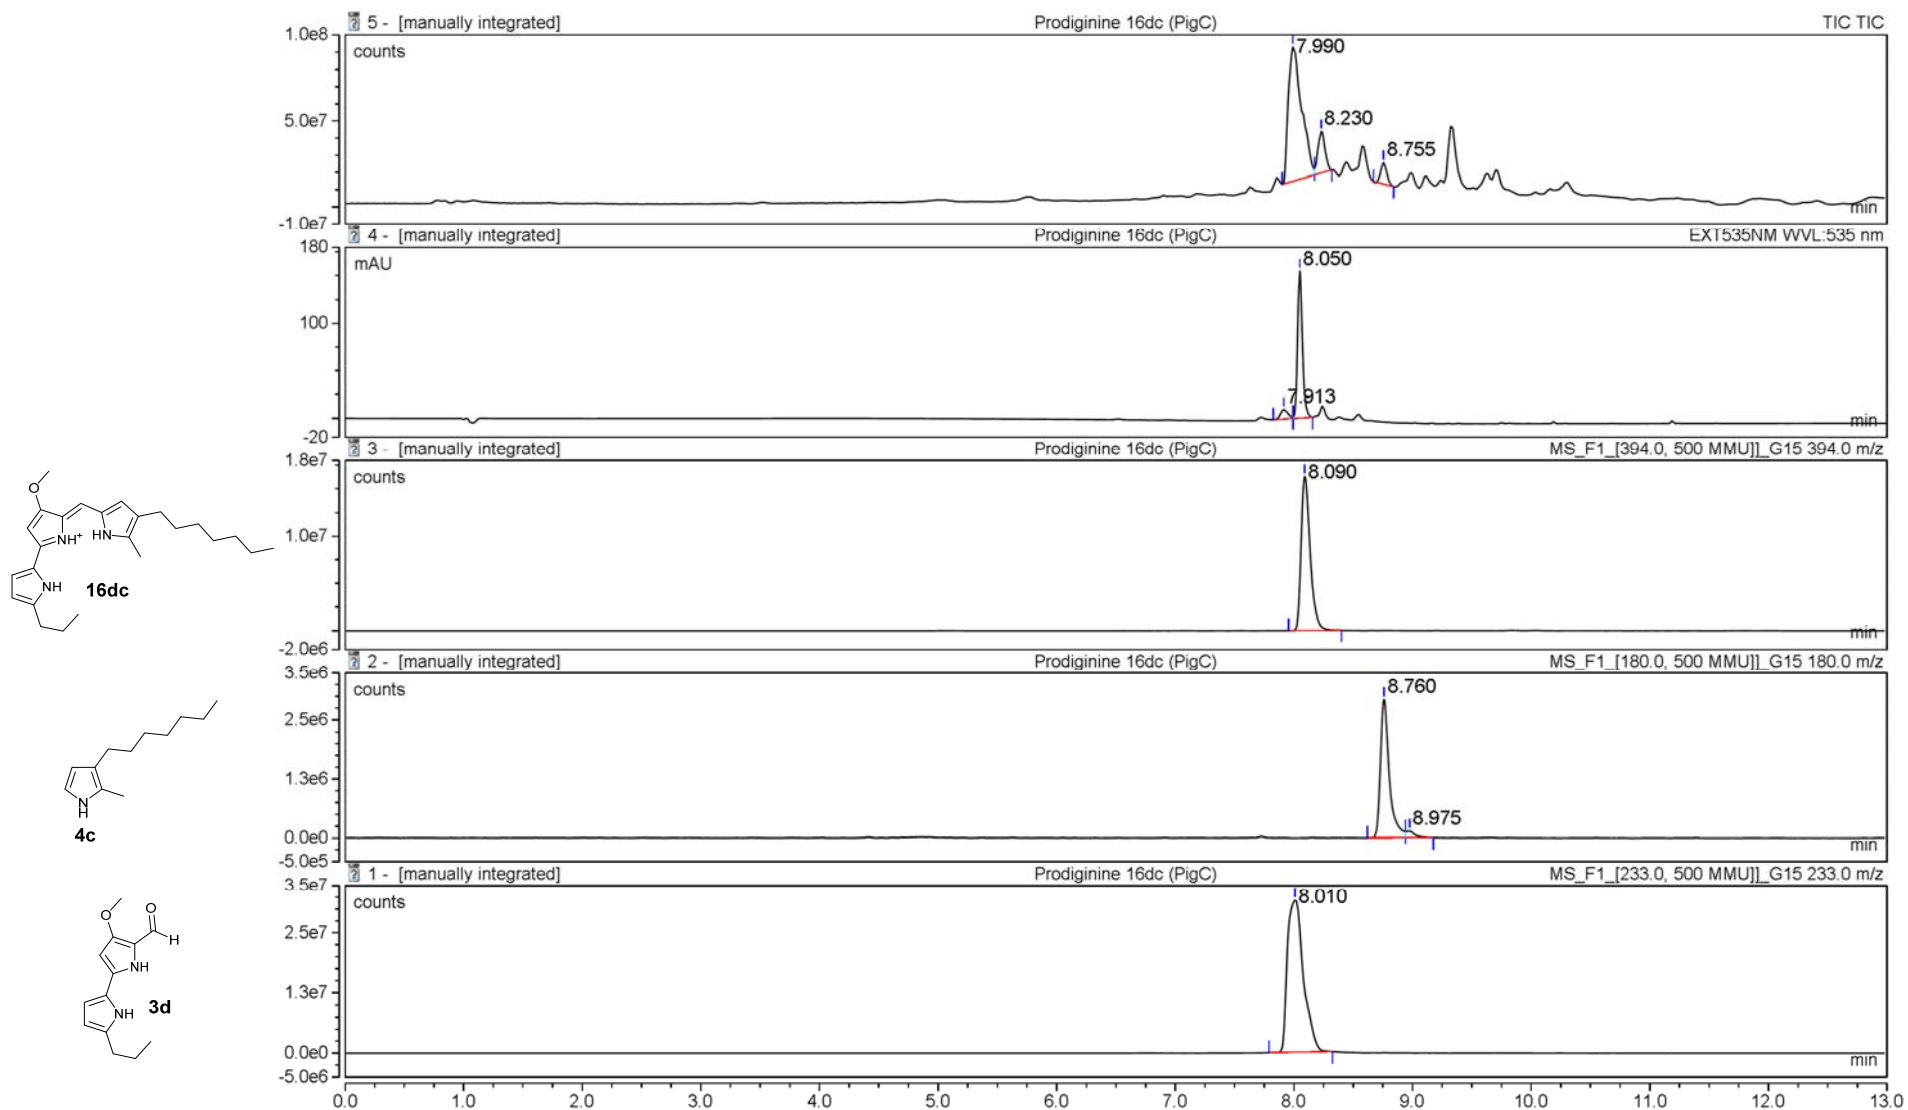

**Figure S92:** LC-MS data [from top to bottom: TIC, UV<sub>535</sub> trace, and EIC of the potential product prodiginine **16dc** (m/z 394.0) and the educts pyrrole **4c** (m/z 191.0) and MBC **3d** (m/z 233.0)] from a representative methanolic reaction extract of the PigC-catalysed condensation reaction between pyrrole **4c** and MBC **3d**. The structures of starting materials and the expected condensation product are shown on the left-hand site besides the corresponding EIC. Retention time of prodiginine **16dc**  $t_R$  8.05 min.

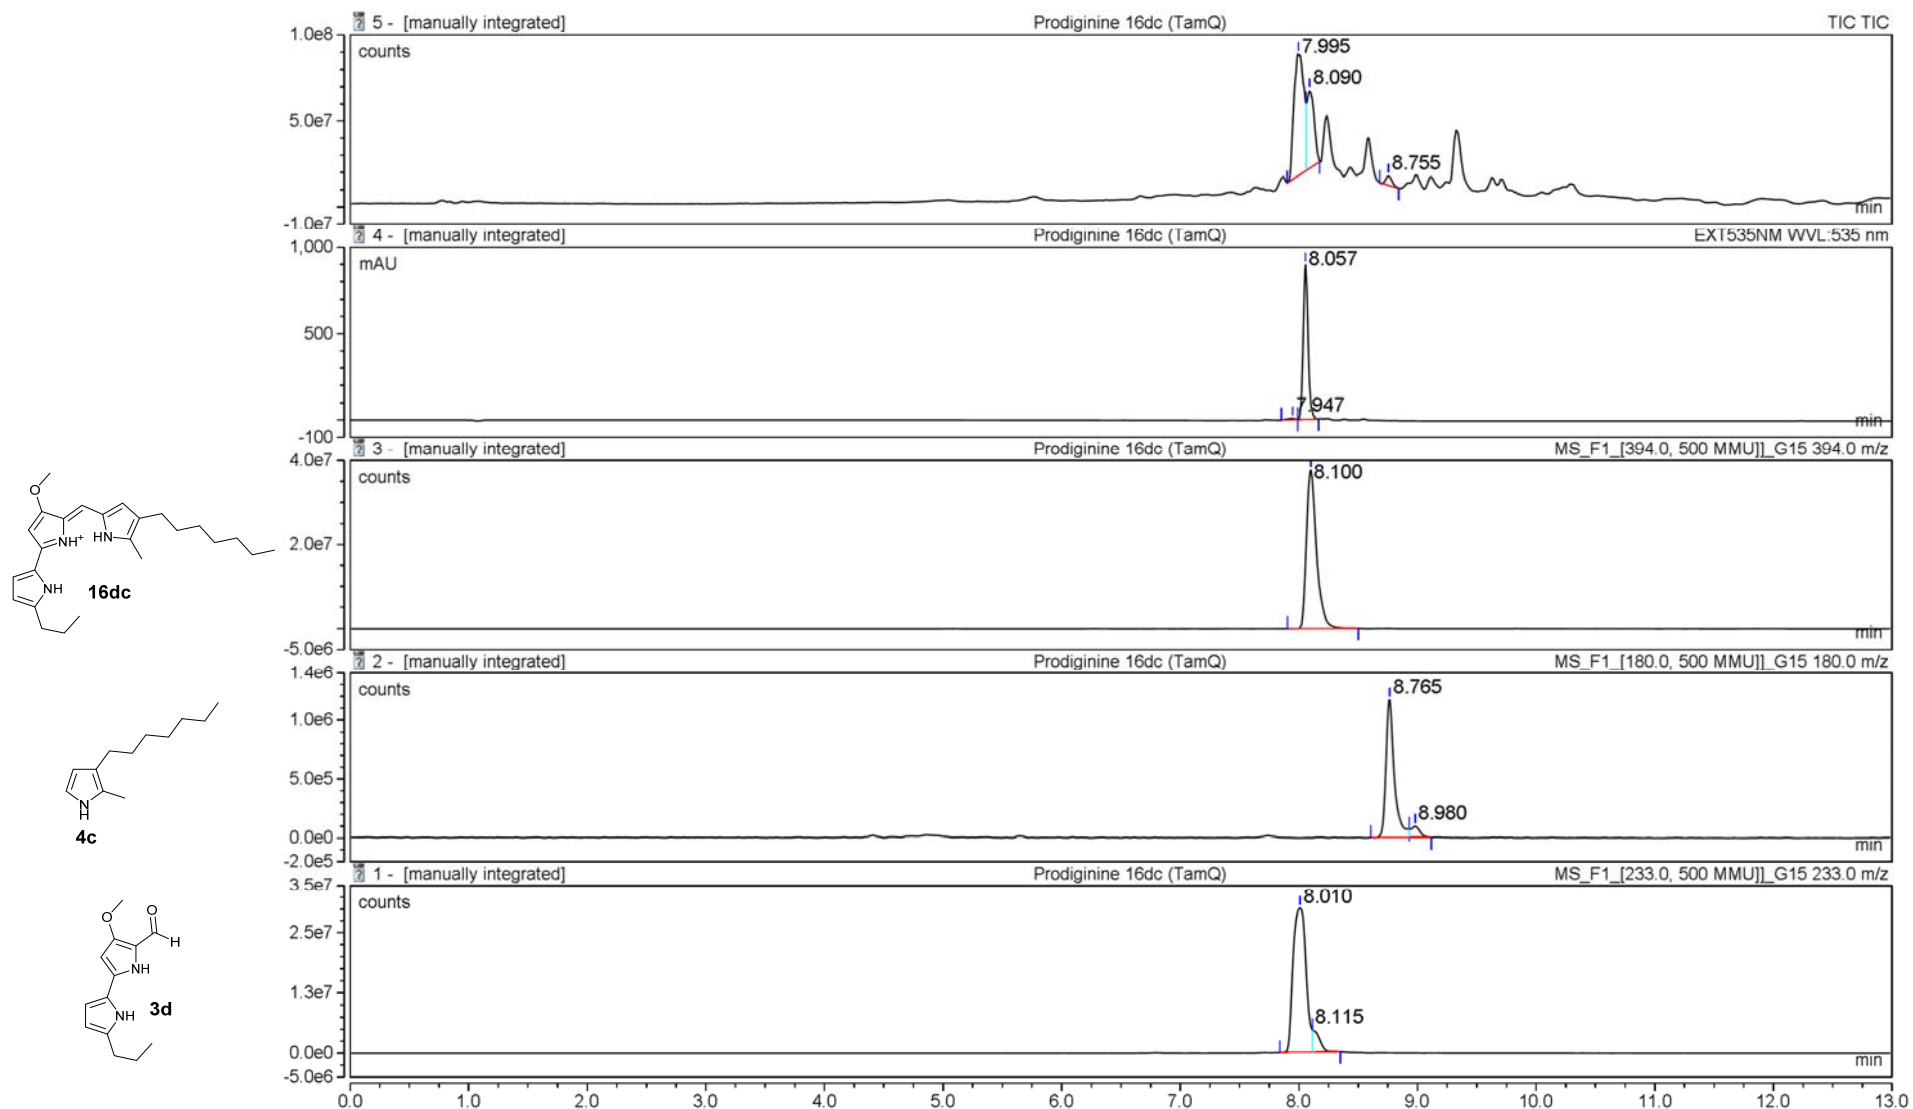

**Figure S93:** LC-MS data [from top to bottom: TIC, UV<sub>535</sub> trace, and EIC of the potential product prodiginine **16dc** ( $m/z$  394.0) and the educts pyrrole **4c** ( $m/z$  180.0) and MBC **3d** ( $m/z$  233.0)] from a representative methanolic reaction extract of the TamQ-catalysed condensation reaction between pyrrole **4c** and MBC **3d**. The structures of starting materials and the expected condensation product are shown on the left-hand site besides the corresponding EIC. Retention time of prodiginine **16dc**  $t_R$  8.06 min.

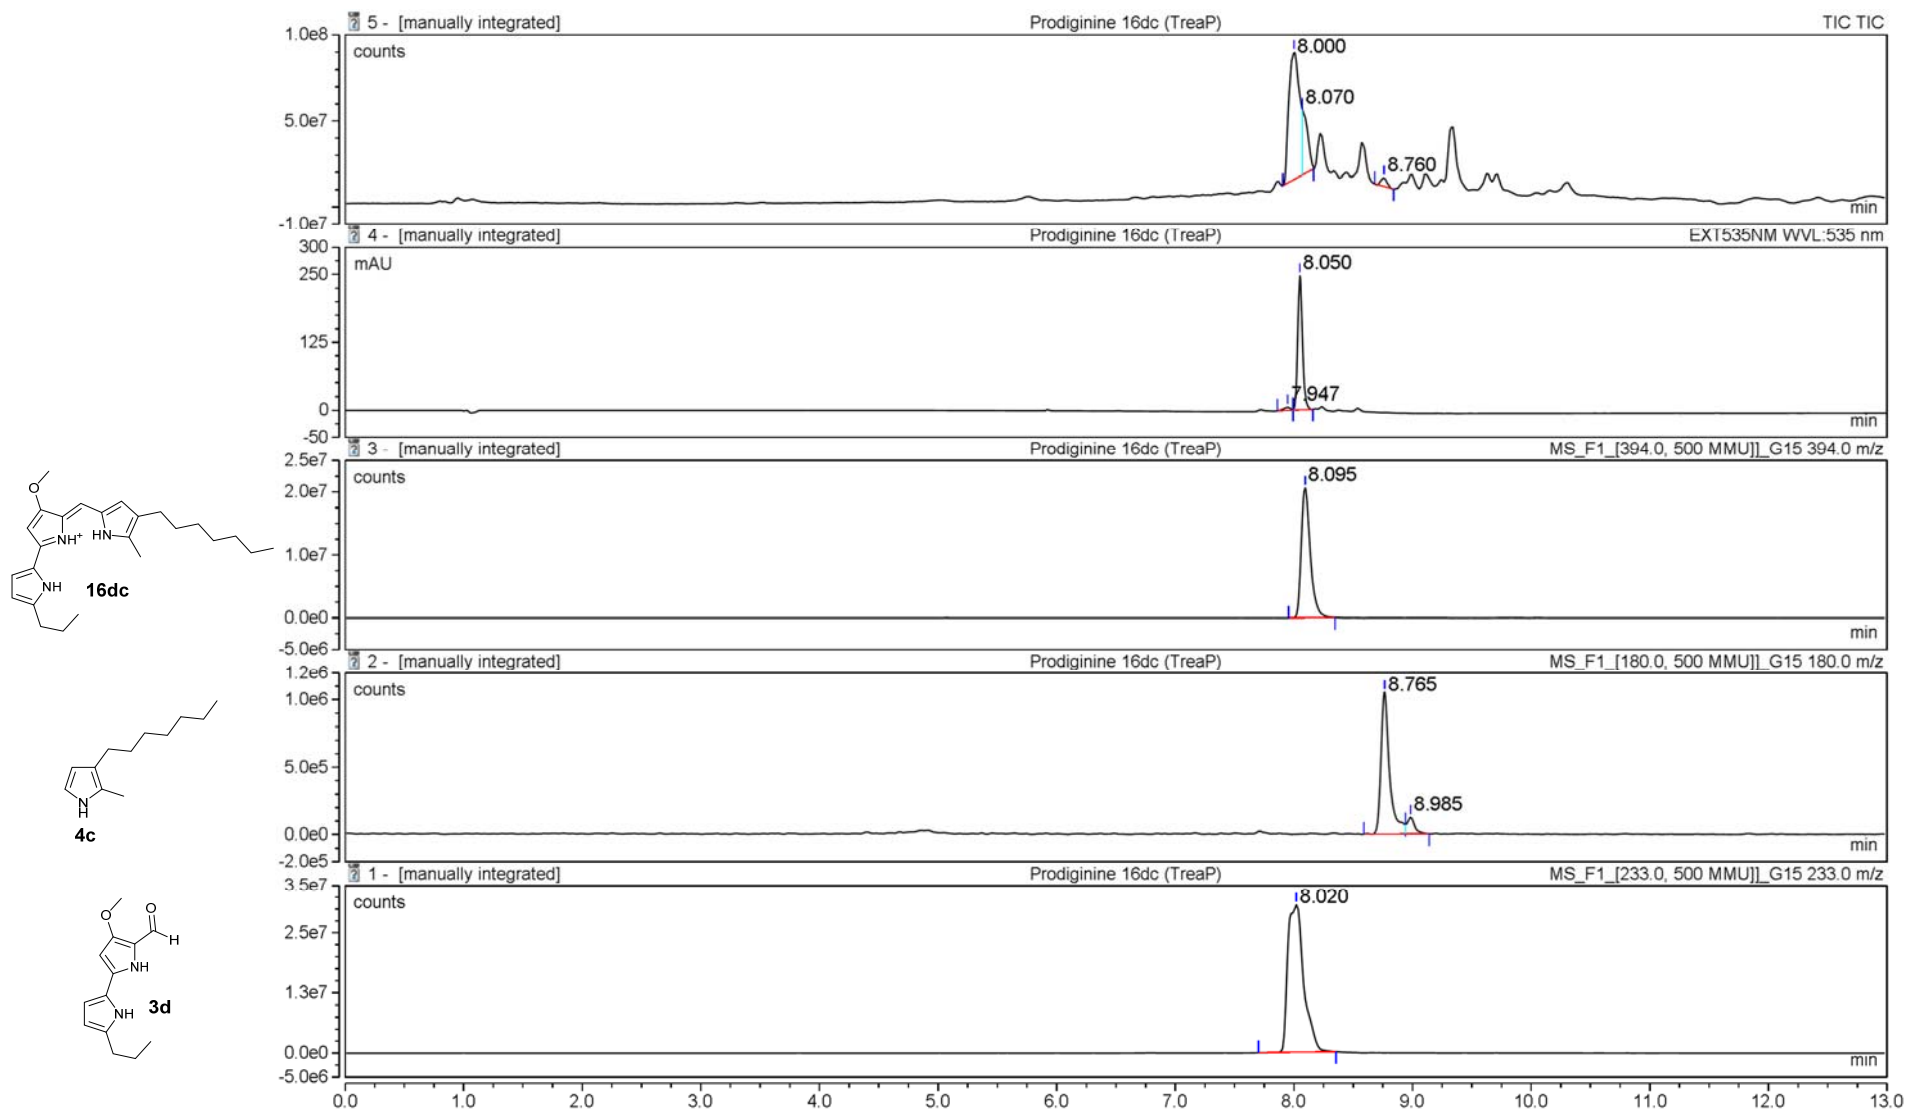

**Figure S94:** LC-MS data [from top to bottom: TIC, UV<sub>535</sub> trace, and EIC of the potential product prodiginine **16dc** ( $m/z$  394.0) and the educts pyrrole **4c** ( $m/z$  191.0) and MBC **3d** ( $m/z$  233.0)] from a representative methanolic reaction extract of the TreaP-catalysed condensation reaction between pyrrole **4c** and MBC **3d**. The structures of starting materials and the expected condensation product are shown on the left-hand site besides the corresponding EIC. Retention time of prodiginine **16dc**  $t_R$  8.05 min.



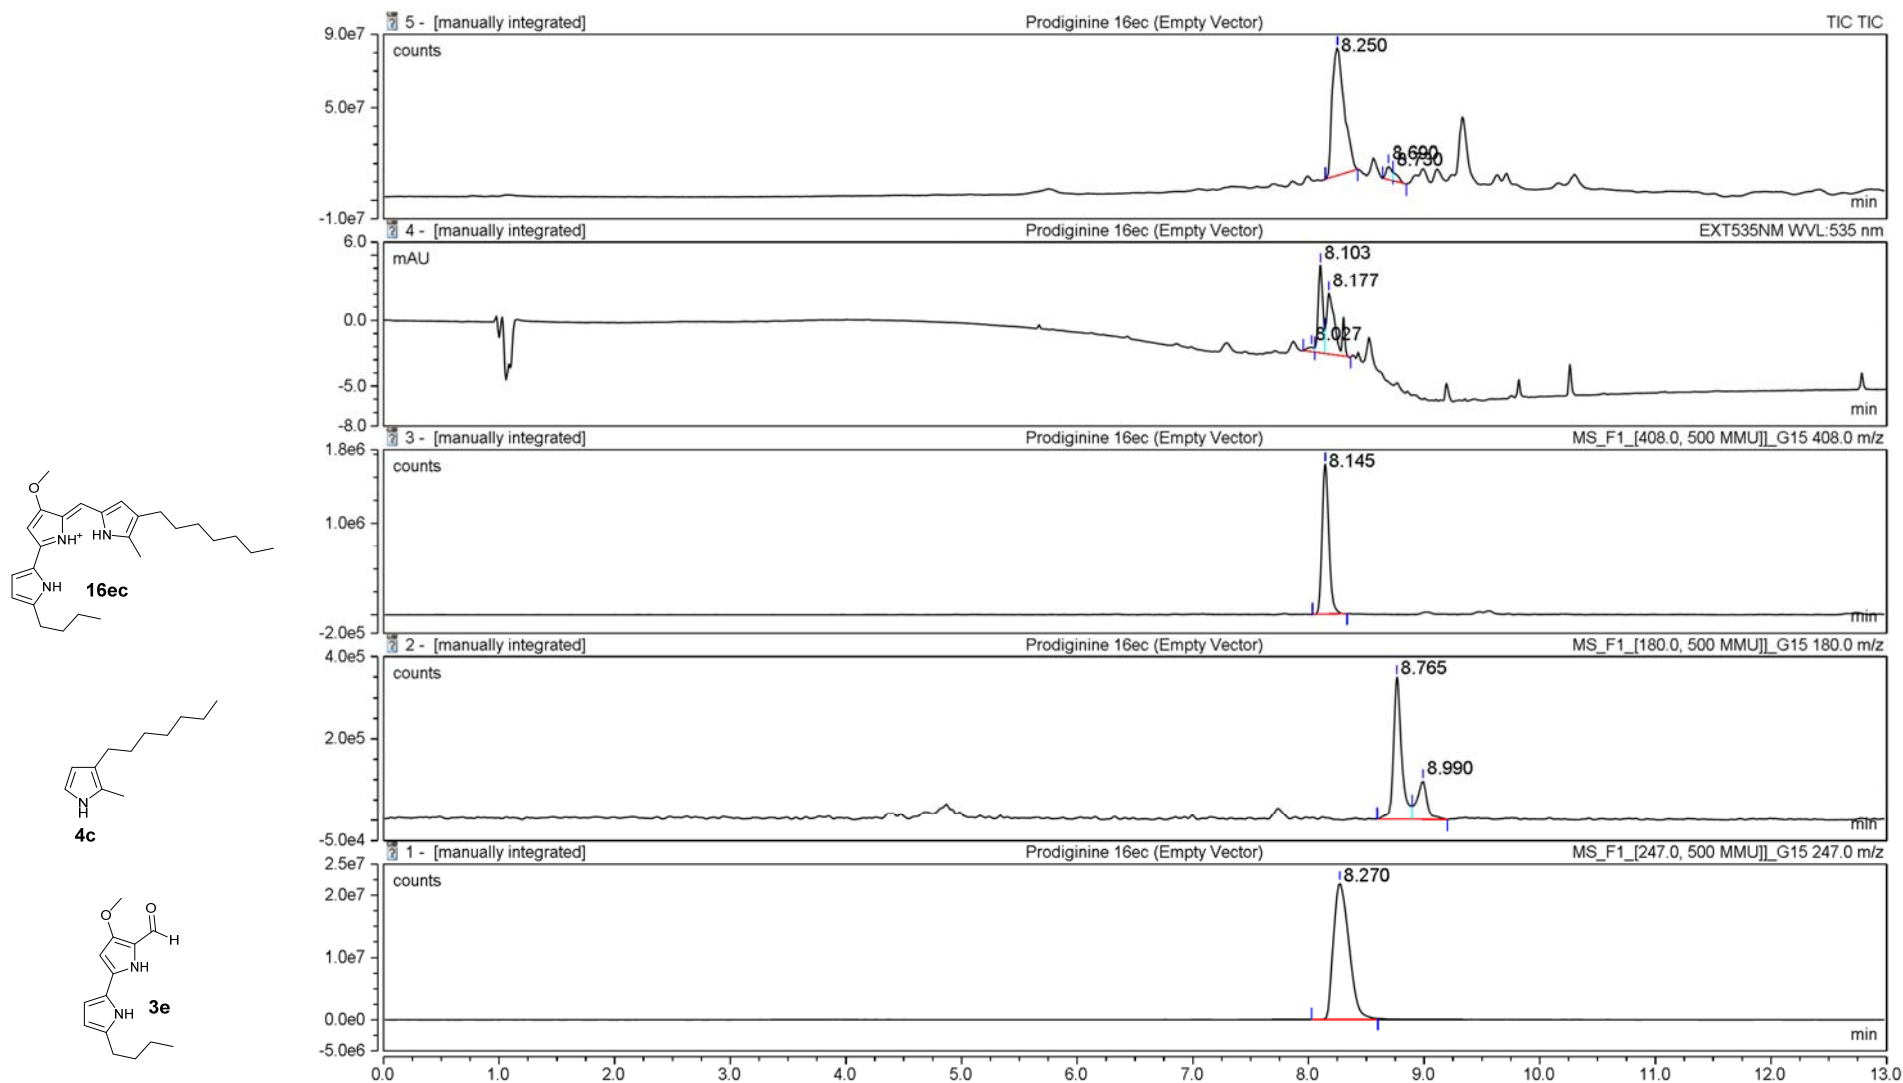

**Figure S95:** LC-MS data [from top to bottom: TIC, UV<sub>535</sub> trace, and extracted ion chromatograms (EIC) of the potential product prodigiosin **16ec** (m/z 408.0) and the educts pyrrole **4c** (m/z 180.0) and MBC **3e** (m/z 247.0)] from a representative methanolic reaction extract of the biocatalytic empty vector control reaction between pyrrole **4c** and MBC **3e**. The structures of starting materials and the expected condensation product are shown on the left-hand site besides the corresponding EIC. The small amount of prodigiosin **16ec** found in the EIC (middle chromatogram) can be traced back to acid-catalysed condensation between pyrrole and MBC during chromatography with 0.1% formic acid. Integration of the corresponding signal from the UV<sub>535</sub> trace gives an integral of 0 mAU·min.

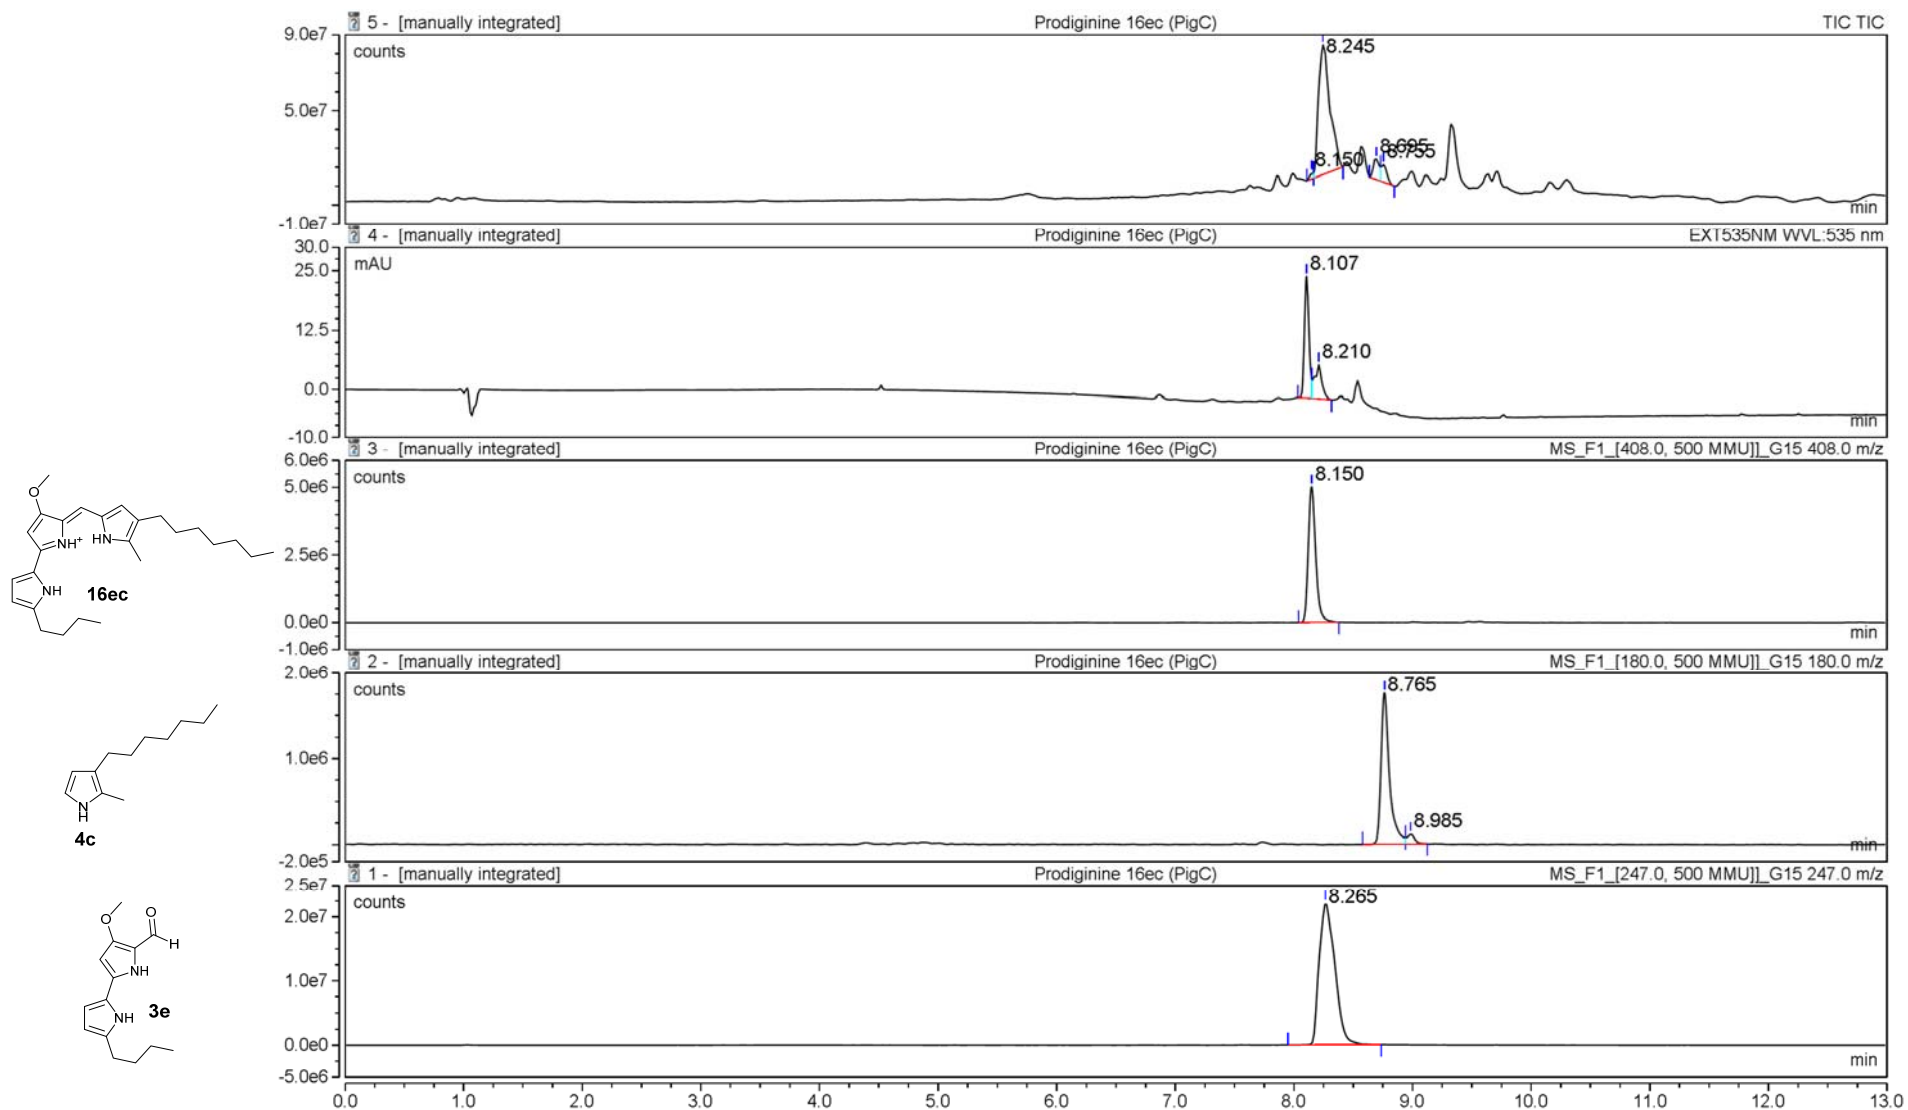

**Figure S96:** LC-MS data [from top to bottom: TIC, UV<sub>535</sub> trace, and EIC of the potential product prodiginine **16ec** (m/z 408.0) and the educts pyrrole **4c** (m/z 191.0) and MBC **3e** (m/z 247.0)] from a representative methanolic reaction extract of the PigC-catalysed condensation reaction between pyrrole **4c** and MBC **3e**. The structures of starting materials and the expected condensation product are shown on the left-hand site besides the corresponding EIC. Retention time of prodiginine **16ec**  $t_R$  8.11 min.

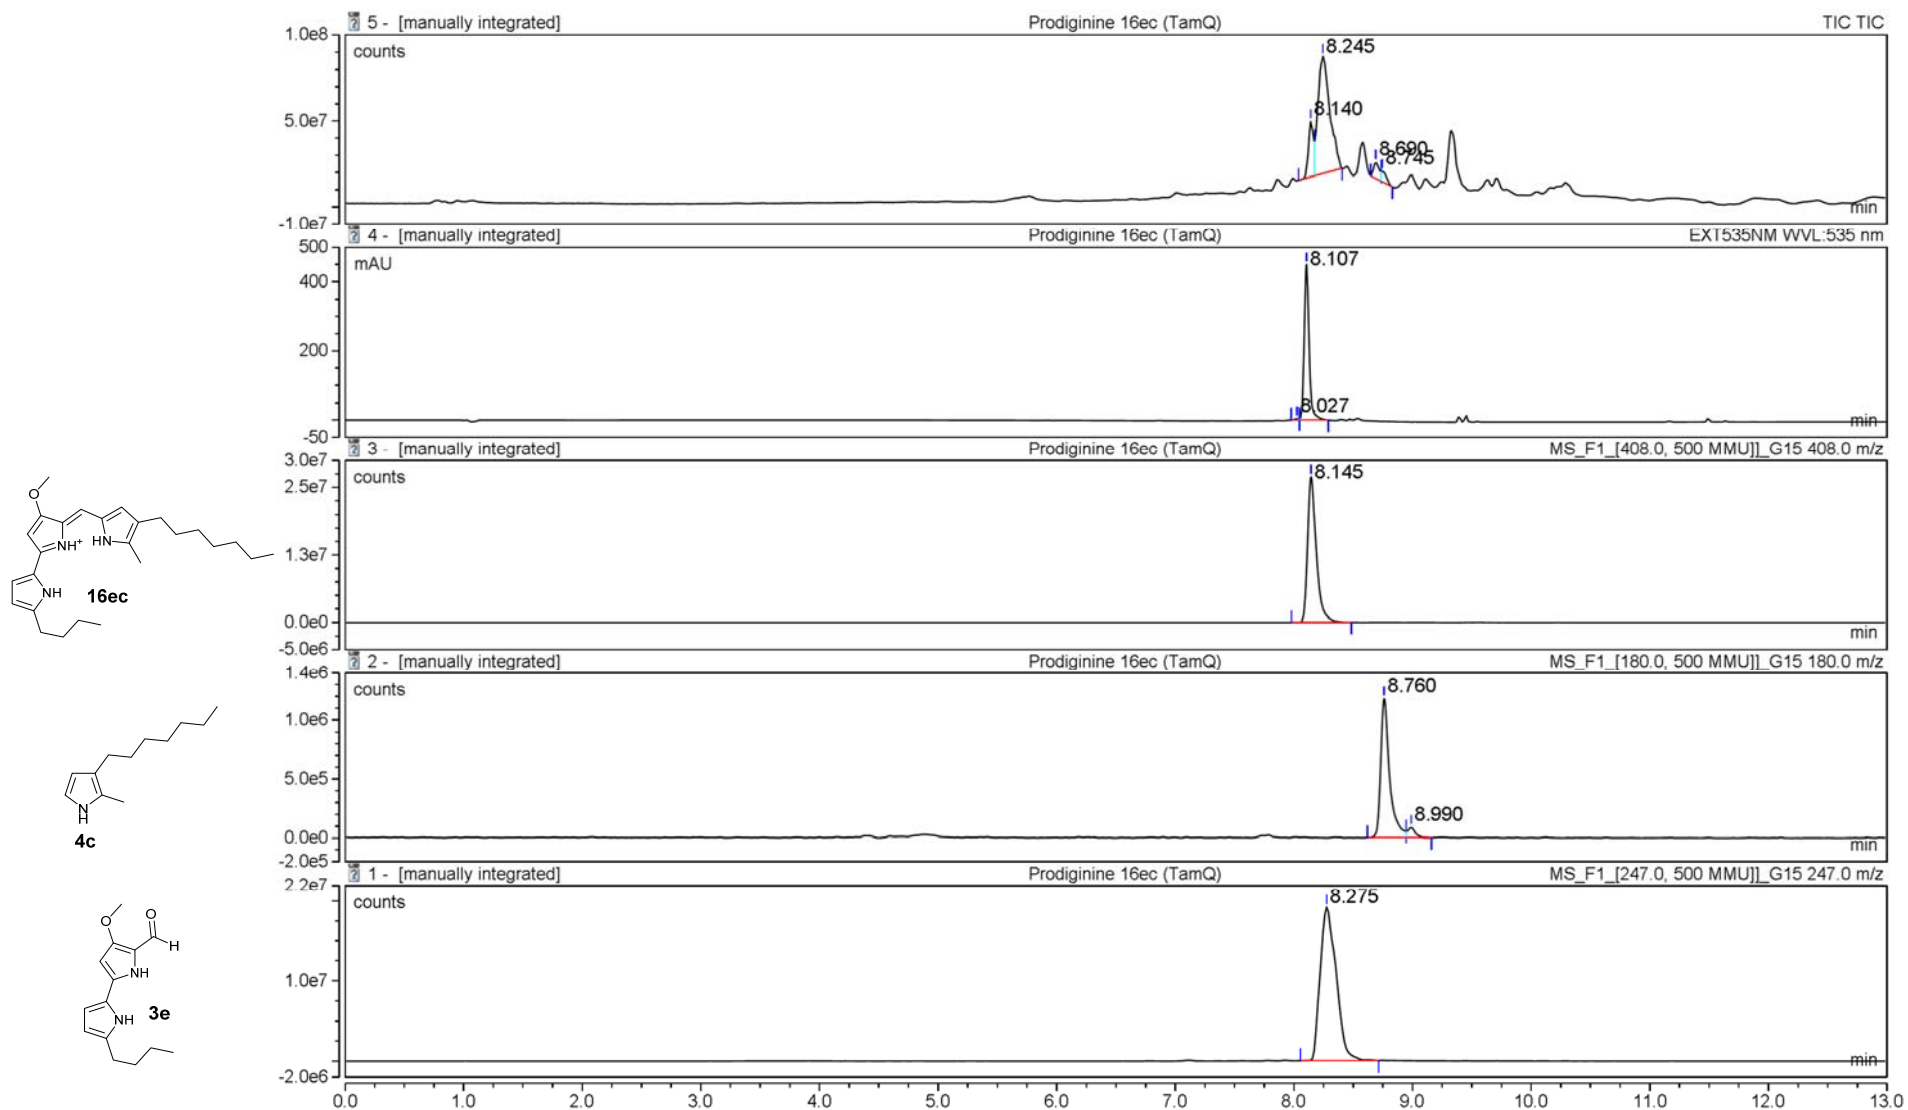

**Figure S97:** LC-MS data [from top to bottom: TIC, UV<sub>535</sub> trace, and EIC of the potential product prodiginine **16ec** (m/z 408.0) and the educts pyrrole **4c** (m/z 191.0) and MBC **3e** (m/z 247.0)] from a representative methanolic reaction extract of the TamQ-catalysed condensation reaction between pyrrole **4c** and MBC **3e**. The structures of starting materials and the expected condensation product are shown on the left-hand site besides the corresponding EIC. Retention time of prodiginine **16ec**  $t_R$  8.11 min.

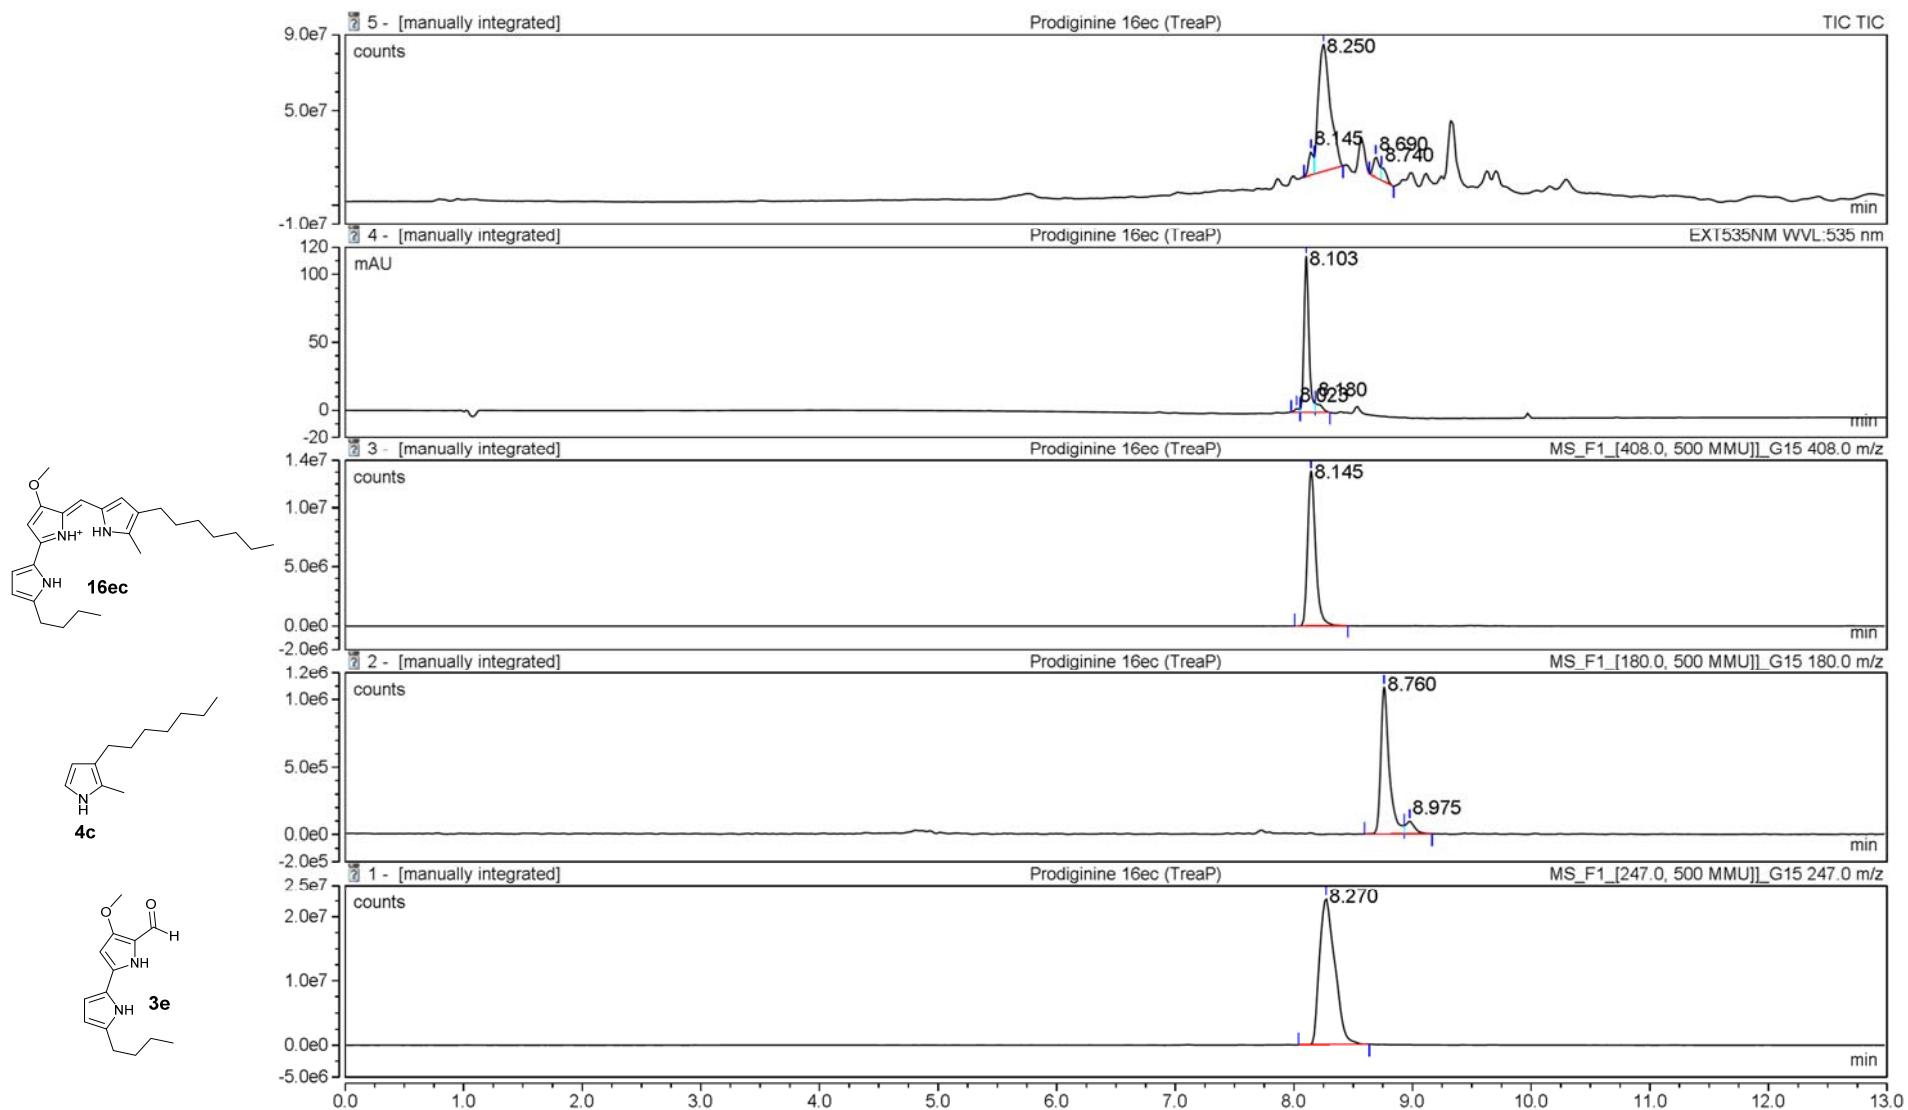

**Figure S98:** LC-MS data [from top to bottom: TIC, UV<sub>535</sub> trace, and EIC of the potential product prodiginine **16ec** (m/z 408.0) and the educts pyrrole **4c** (m/z 191.0) and MBC **3e** (m/z 247.0)] from a representative methanolic reaction extract of the TreaP-catalysed condensation reaction between pyrrole **4c** and MBC **3e**. The structures of starting materials and the expected condensation product are shown on the left-hand side besides the corresponding EIC. Retention time of prodiginine **16ec**  $t_R$  8.10 min.

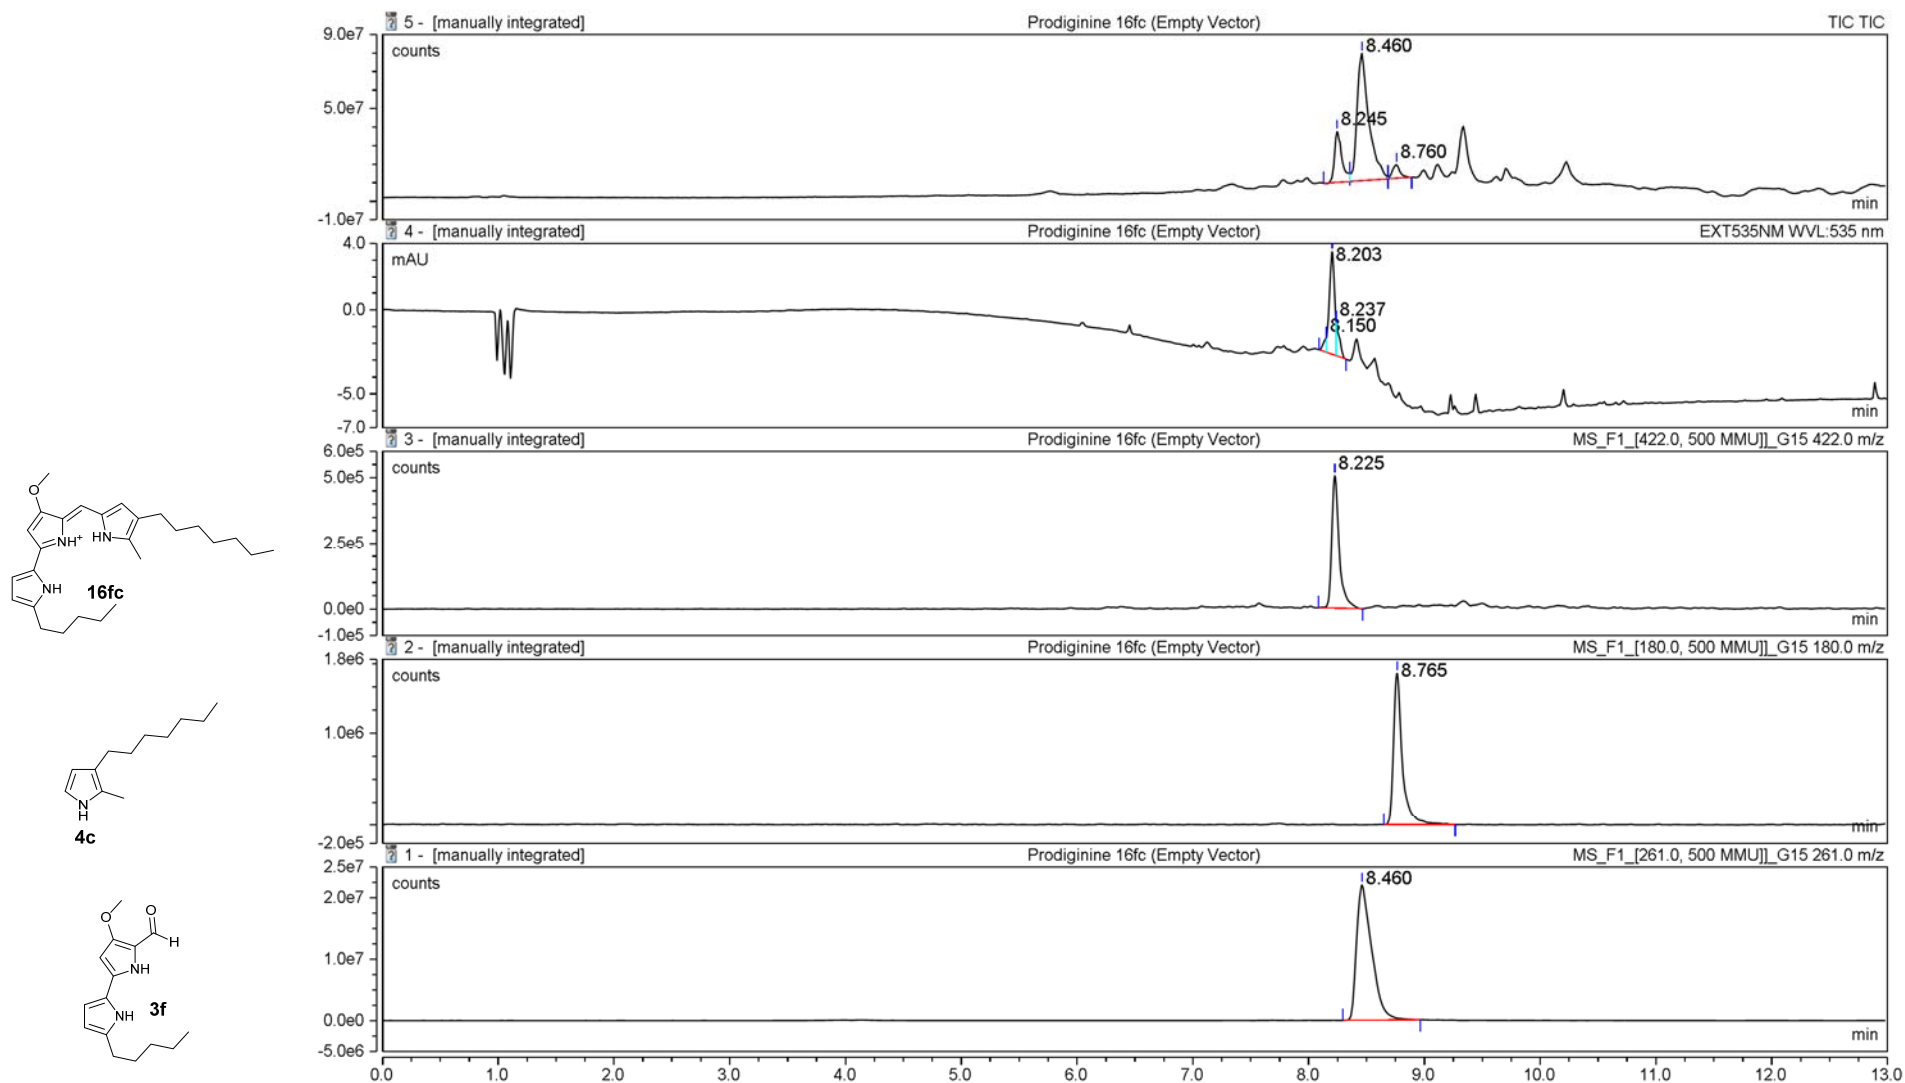

**Figure S99:** LC-MS data [from top to bottom: TIC, UV<sub>535</sub> trace, and extracted ion chromatograms (EIC) of the potential product prodiginosin **16fc** (m/z 422.0) and the educts pyrrole **4c** (m/z 180.0) and MBC **3f** (m/z 261.0)] from a representative methanolic reaction extract of the biocatalytic empty vector control reaction between pyrrole **4c** and MBC **3f**. The structures of starting materials and the expected condensation product are shown on the left-hand site besides the corresponding EIC. The small amount of prodiginosin **16fc** found in the EIC (middle chromatogram) can be traced back to acid-catalysed condensation between pyrrole and MBC during chromatography with 0.1% formic acid. Integration of the corresponding signal from the UV<sub>535</sub> trace gives an integral of 0 mAU·min.

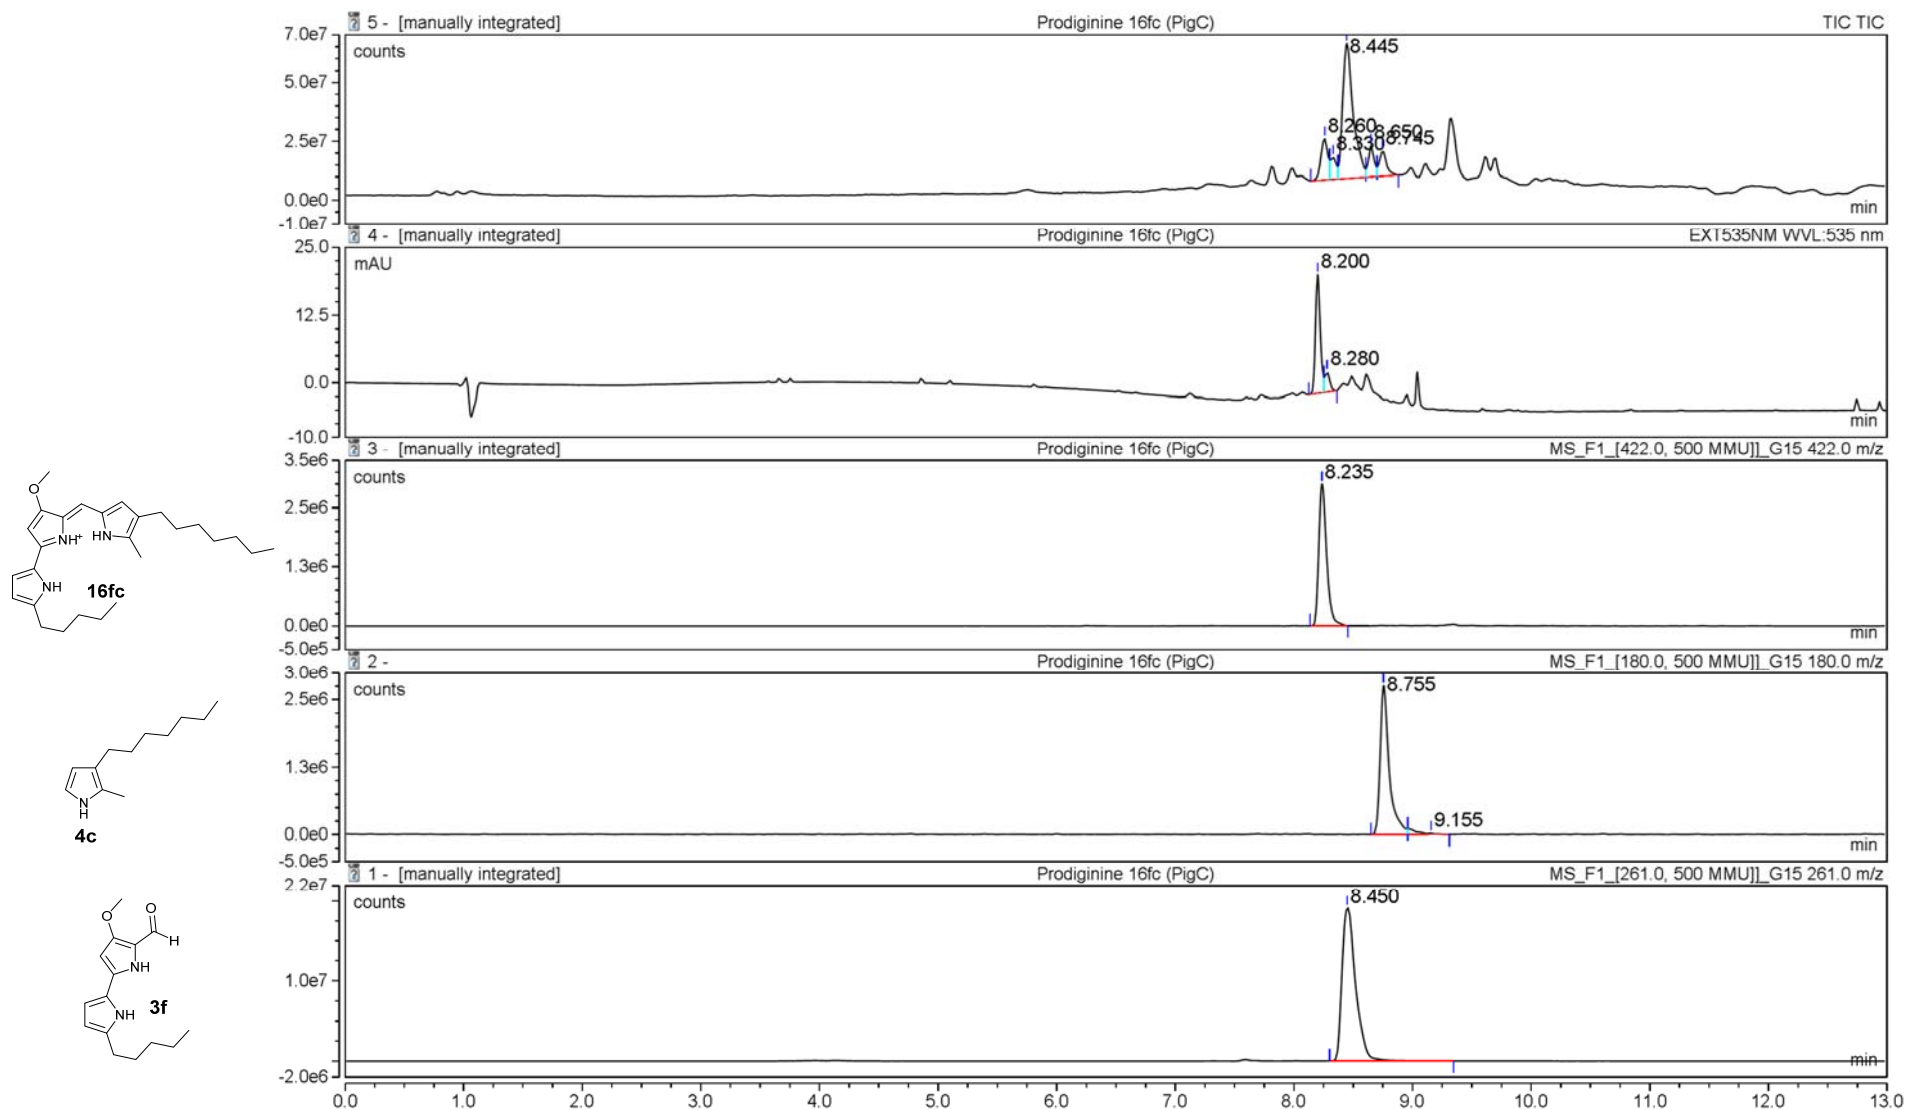

**Figure S100:** LC-MS data [from top to bottom: TIC, UV<sub>535</sub> trace, and EIC of the potential product prodiginine **16fc** (m/z 422.0) and the educts pyrrole **4c** (m/z 191.0) and MBC **3f** (m/z 261.0)] from a representative methanolic reaction extract of the PigC-catalysed condensation reaction between pyrrole **4c** and MBC **3f**. The structures of starting materials and the expected condensation product are shown on the left-hand site besides the corresponding EIC. Retention time of prodiginine **16fc**  $t_R$  8.20 min.

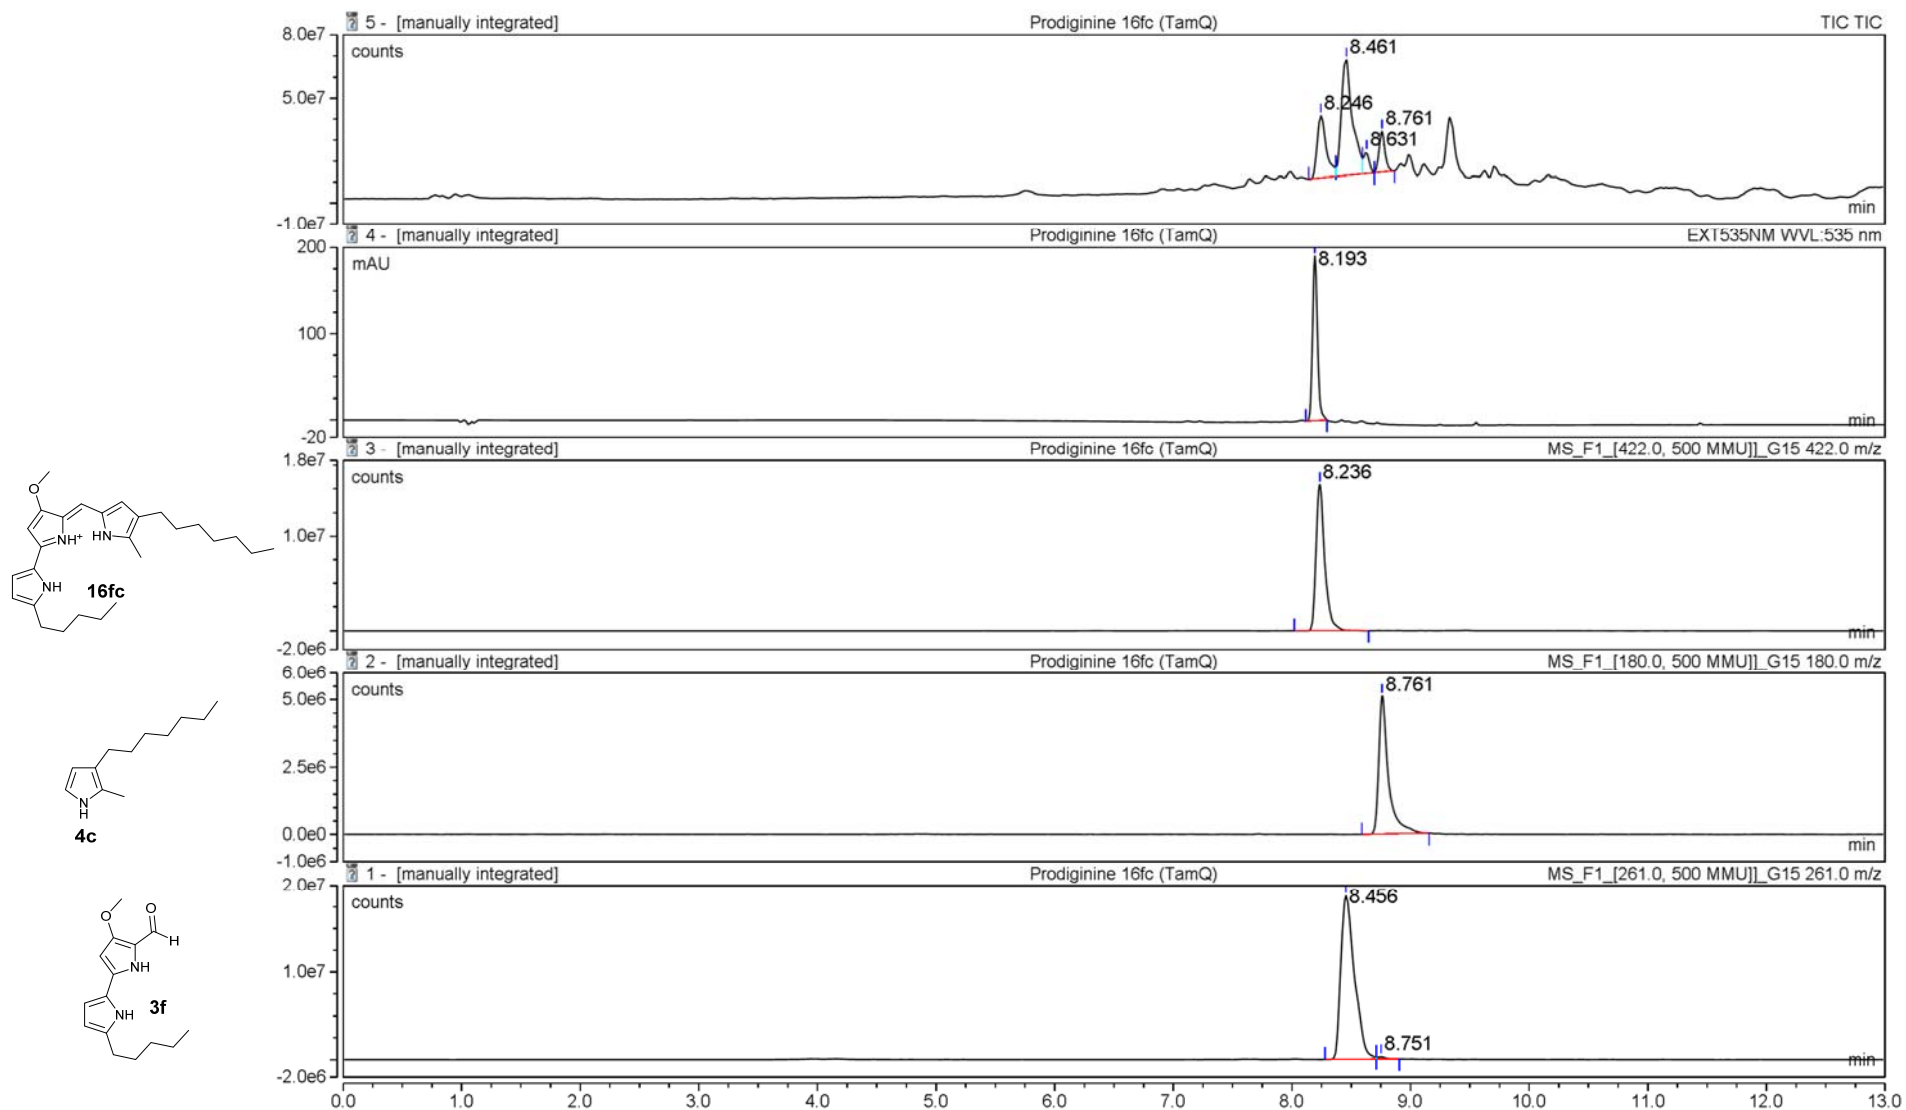

**Figure S101:** LC-MS data [from top to bottom: TIC, UV<sub>535</sub> trace, and EIC of the potential product prodiginine **16fc** (m/z 422.0) and the educts pyrrole **4c** (m/z 191.0) and MBC **3f** (m/z 261.0)] from a representative methanolic reaction extract of the TamQ-catalysed condensation reaction between pyrrole **4c** and MBC **3f**. The structures of starting materials and the expected condensation product are shown on the left-hand site besides the corresponding EIC. Retention time of prodiginine **16fc**  $t_R$  8.19 min.

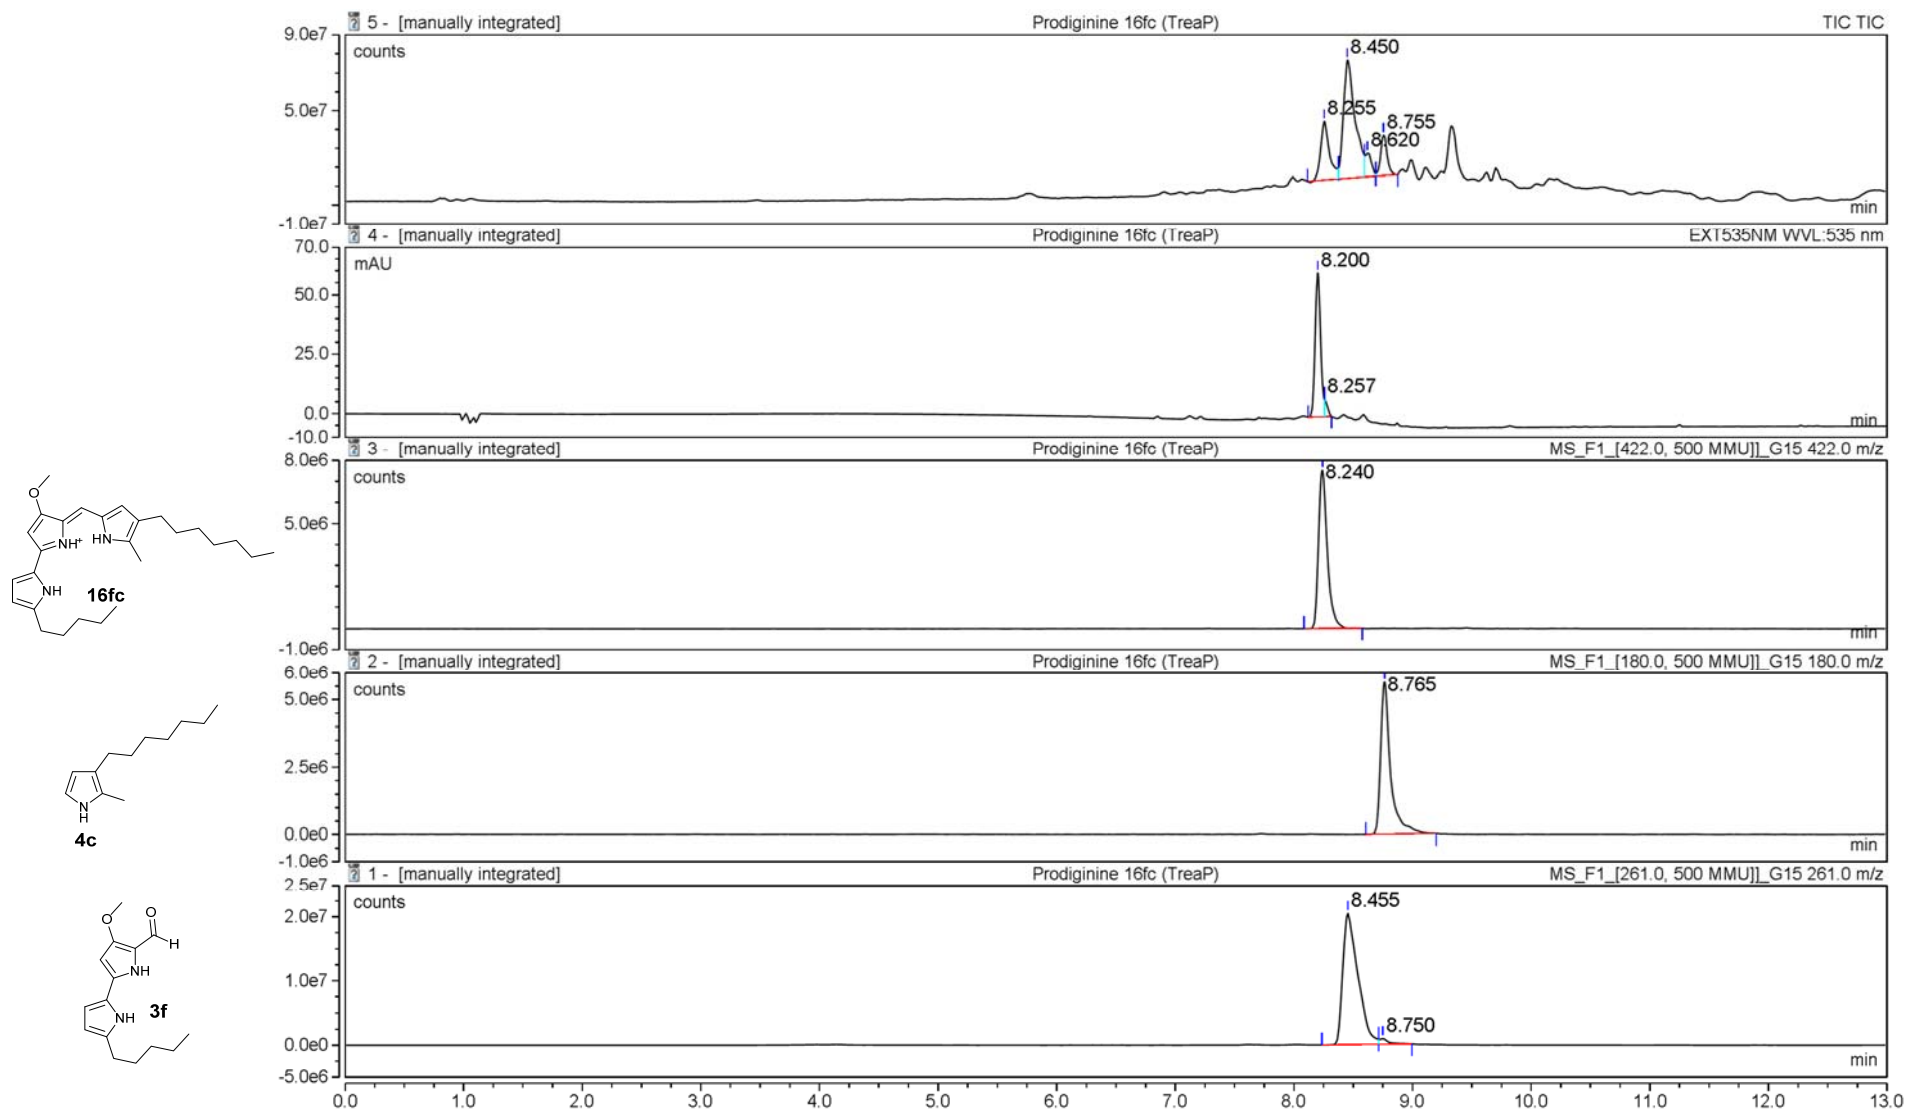

**Figure S102:** LC-MS data [from top to bottom: TIC, UV<sub>535</sub> trace, and EIC of the potential product prodiginine **16fc** (m/z 422.0) and the educts pyrrole **4c** (m/z 180.0) and MBC **3f** (m/z 261.0)] from a representative methanolic reaction extract of the TreaP-catalysed condensation reaction between pyrrole **4c** and MBC **3f**. The structures of starting materials and the expected condensation product are shown on the left-hand site besides the corresponding EIC. Retention time of prodiginine **16fc**  $t_R$  8.20 min.



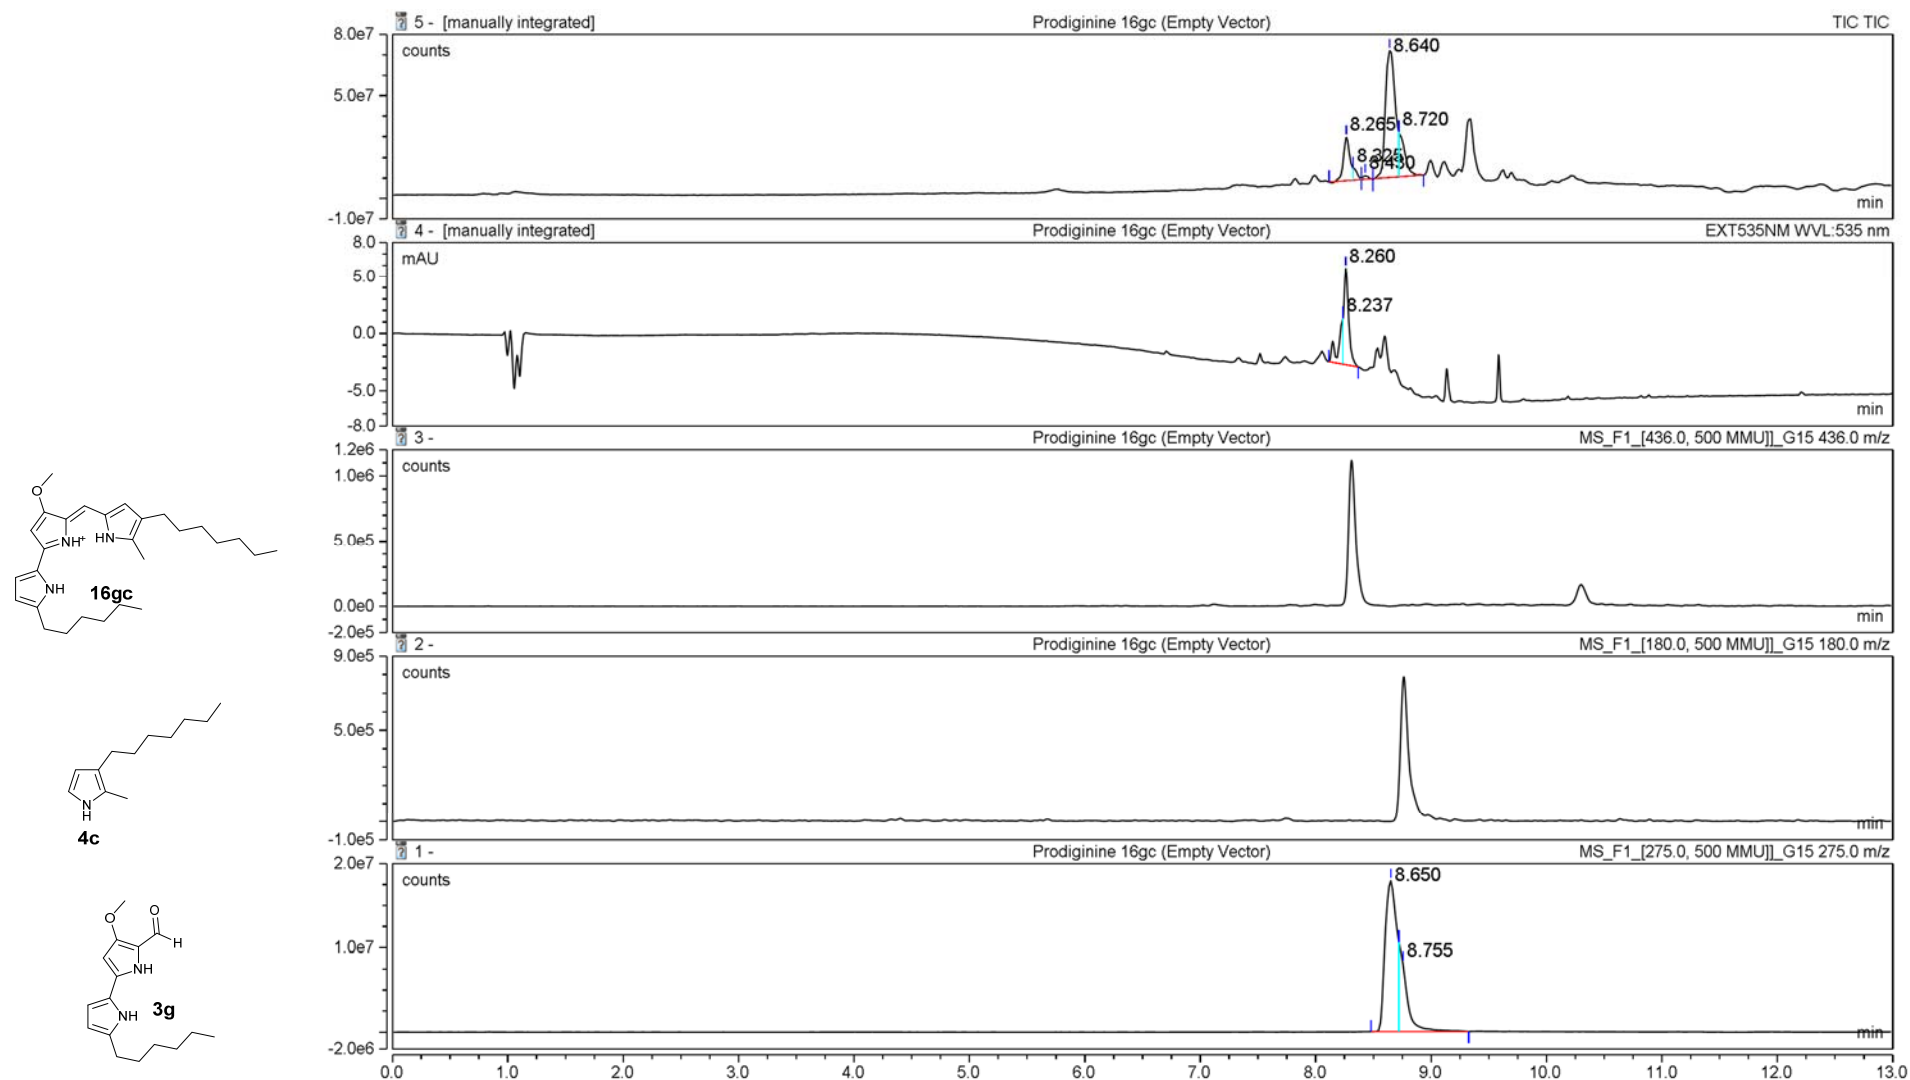

**Figure S103:** LC-MS data [from top to bottom: TIC, UV<sub>535</sub> trace, and extracted ion chromatograms (EIC) of the potential product prodiginosin **16gc** (m/z 436.0) and the educts pyrrole **4c** (m/z 180.0) and MBC **3g** (m/z 275.0)] from a representative methanolic reaction extract of the biocatalytic empty vector control reaction between pyrrole **4c** and MBC **3g**. The structures of starting materials and the expected condensation product are shown on the left-hand side besides the corresponding EIC. The small amount of prodiginosin **16gc** found in the EIC (middle chromatogram) can be traced back to acid-catalysed condensation between pyrrole and MBC during chromatography with 0.1% formic acid. Integration of the corresponding signal from the UV<sub>535</sub> trace gives an integral of 0 mAU·min.

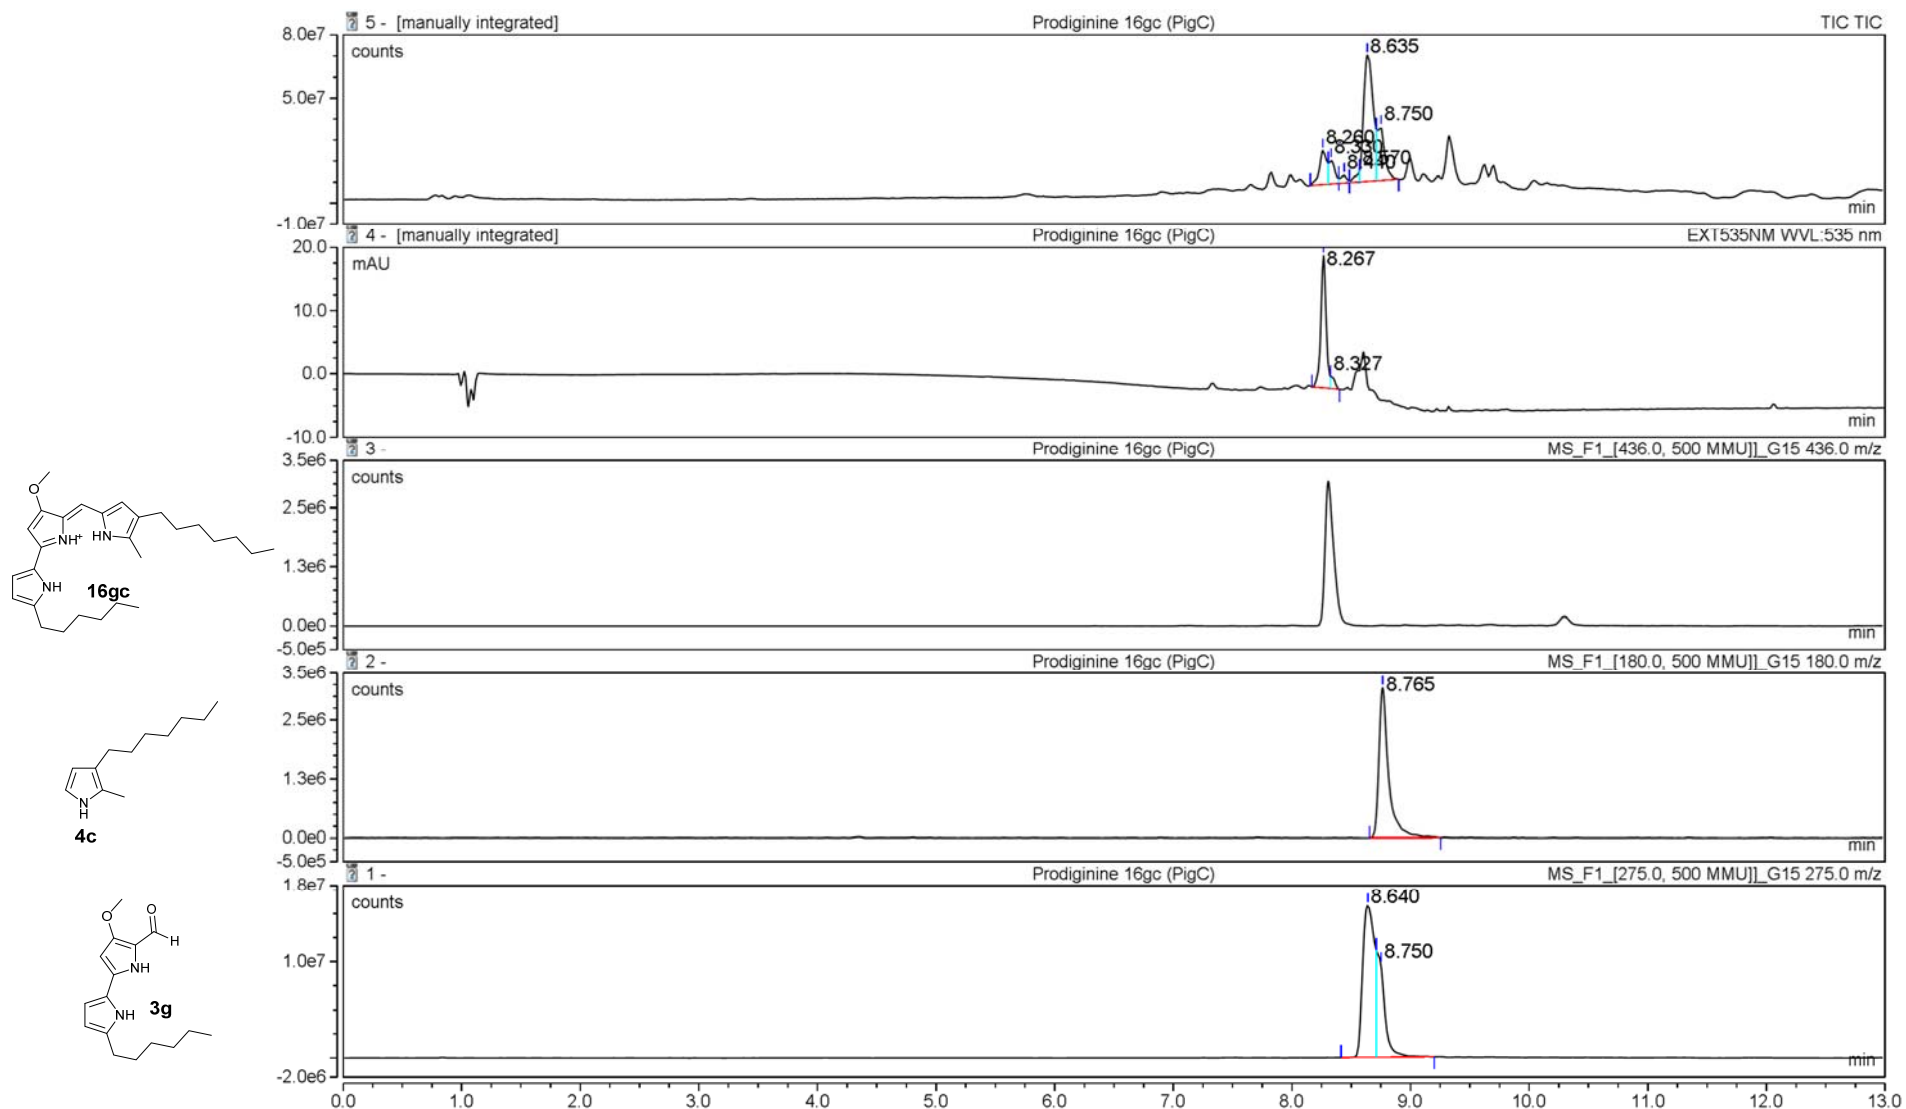

**Figure S104:** LC-MS data [from top to bottom: TIC, UV<sub>535</sub> trace, and EIC of the potential product prodiginine **16gc** (m/z 436.0) and the educts pyrrole **4c** (m/z 191.0) and MBC **3g** (m/z 275.0)] from a representative methanolic reaction extract of the PigC-catalysed condensation reaction between pyrrole **4c** and MBC **3g**. The structures of starting materials and the expected condensation product are shown on the left-hand site besides the corresponding EIC. Retention time of prodiginine **16gc**  $t_R$  8.27 min.

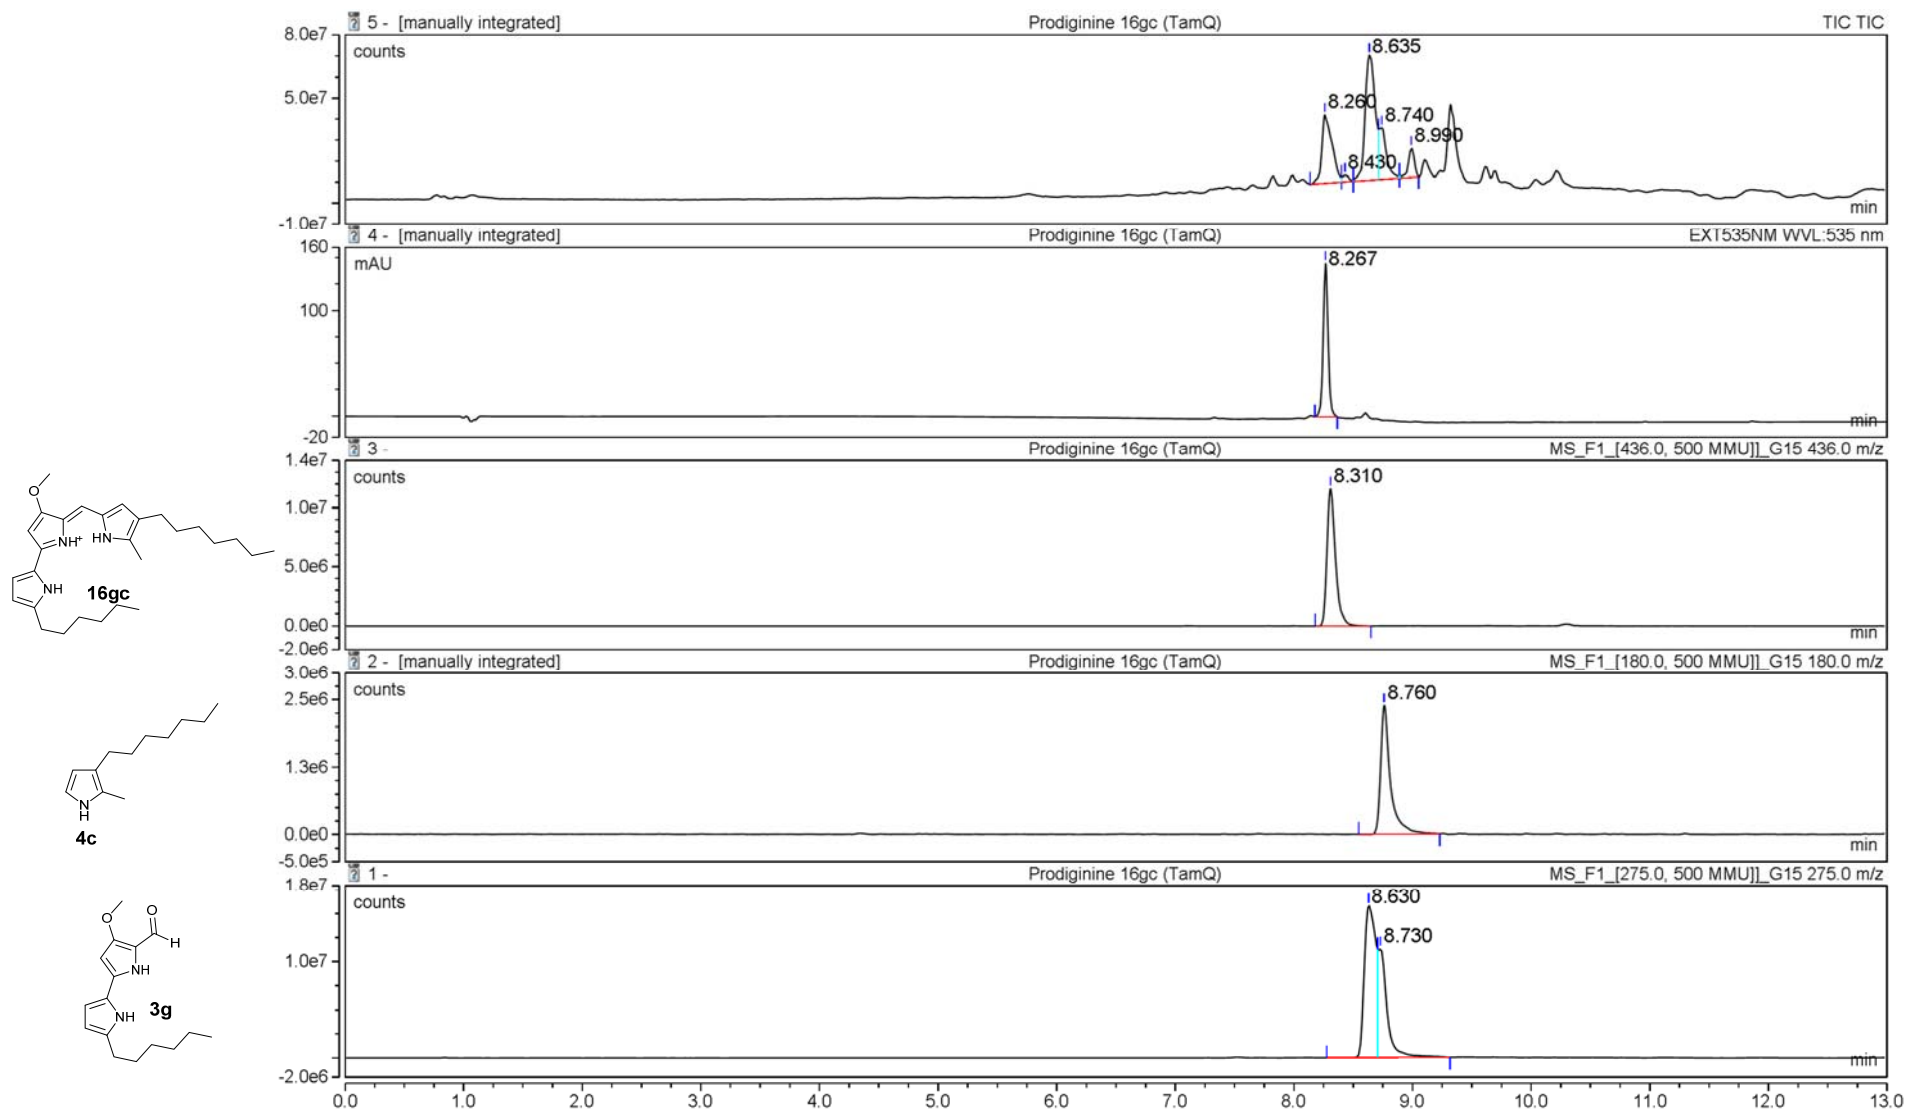

**Figure S105:** LC-MS data [from top to bottom: TIC, UV<sub>535</sub> trace, and EIC of the potential product prodiginine **16gc** (m/z 436.0) and the educts pyrrole **4c** (m/z 191.0) and MBC **3g** (m/z 275.0)] from a representative methanolic reaction extract of the TamQ-catalysed condensation reaction between pyrrole **4c** and MBC **3g**. The structures of starting materials and the expected condensation product are shown on the left-hand site besides the corresponding EIC. Retention time of prodiginine **16gc**  $t_R$  8.27 min.

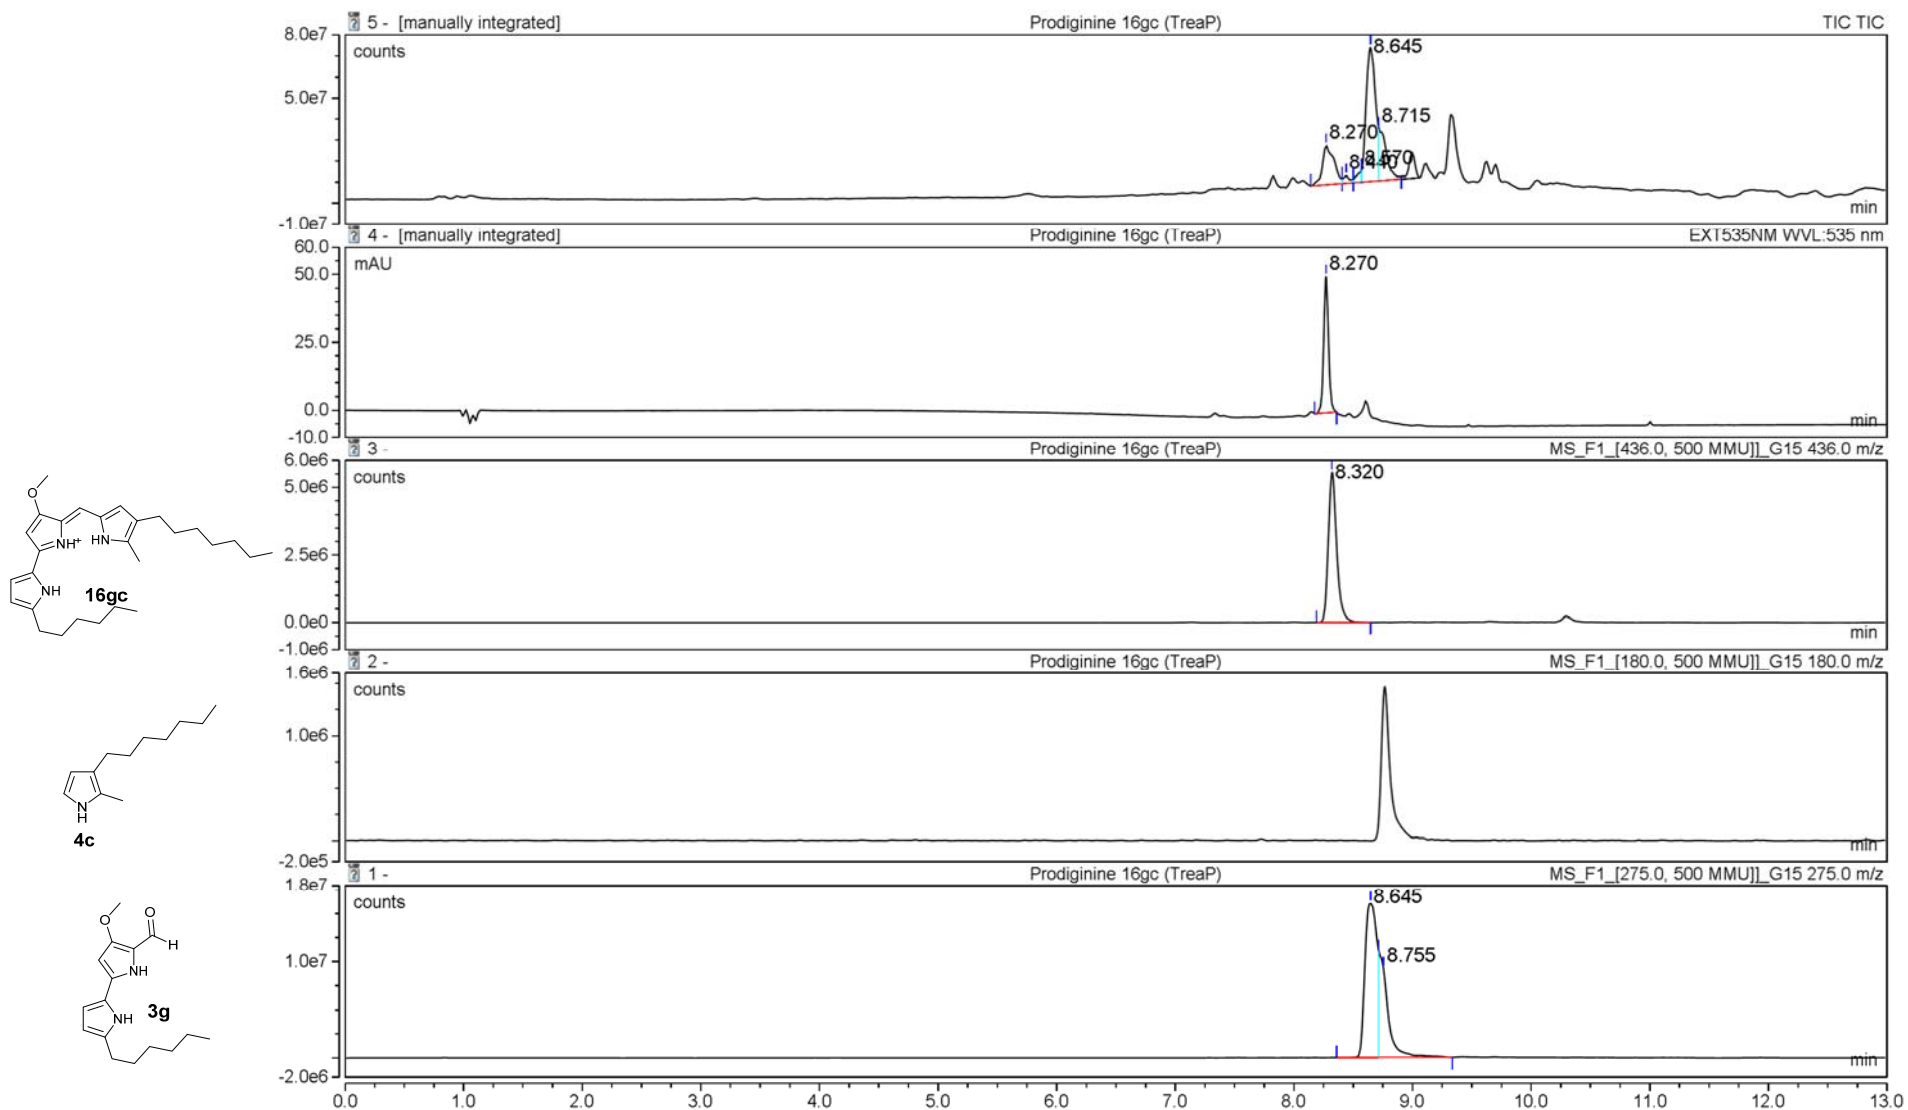

**Figure S106:** LC-MS data [from top to bottom: TIC, UV<sub>535</sub> trace, and EIC of the potential product prodiginine **16gc** (m/z 436.0) and the educts pyrrole **4c** (m/z 191.0) and MBC **3g** (m/z 275.0)] from a representative methanolic reaction extract of the TreaP-catalysed condensation reaction between pyrrole **4c** and MBC **3g**. The structures of starting materials and the expected condensation product are shown on the left-hand site besides the corresponding EIC. Retention time of prodiginine **16gc**  $t_R$  8.27 min.

### 13. LC-MS Chromatograms – Negative Controls

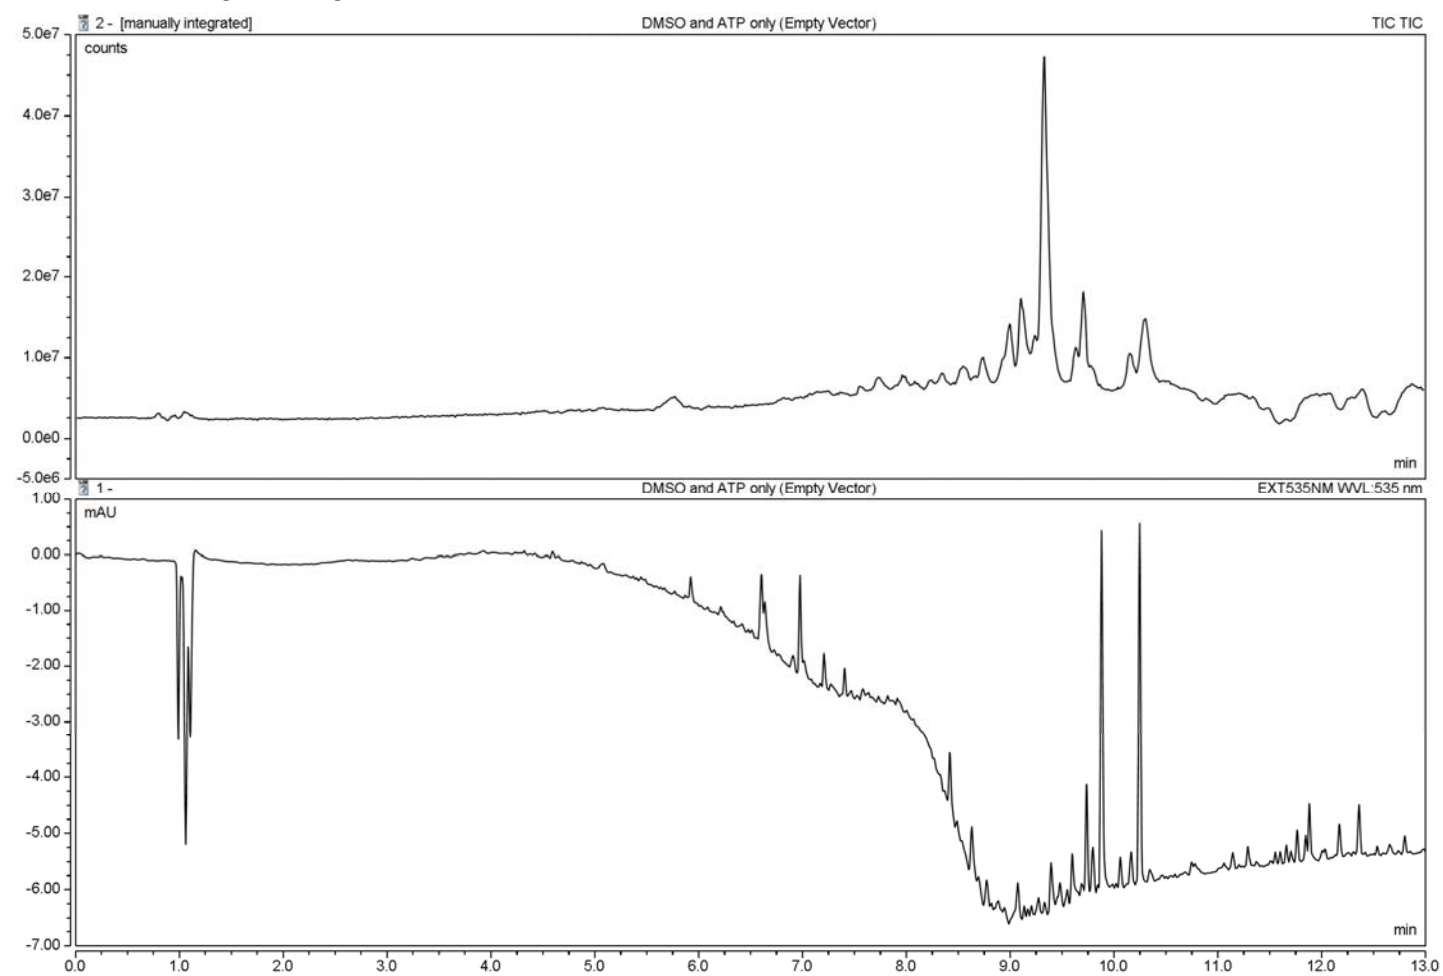

**Figure S107:** LC-MS data (TIC and UV<sub>535</sub> trace) of the methanolic reaction extract from the empty vector negative control reaction, containing ATP and DMSO only, but no pyrroles or MBC derivatives.

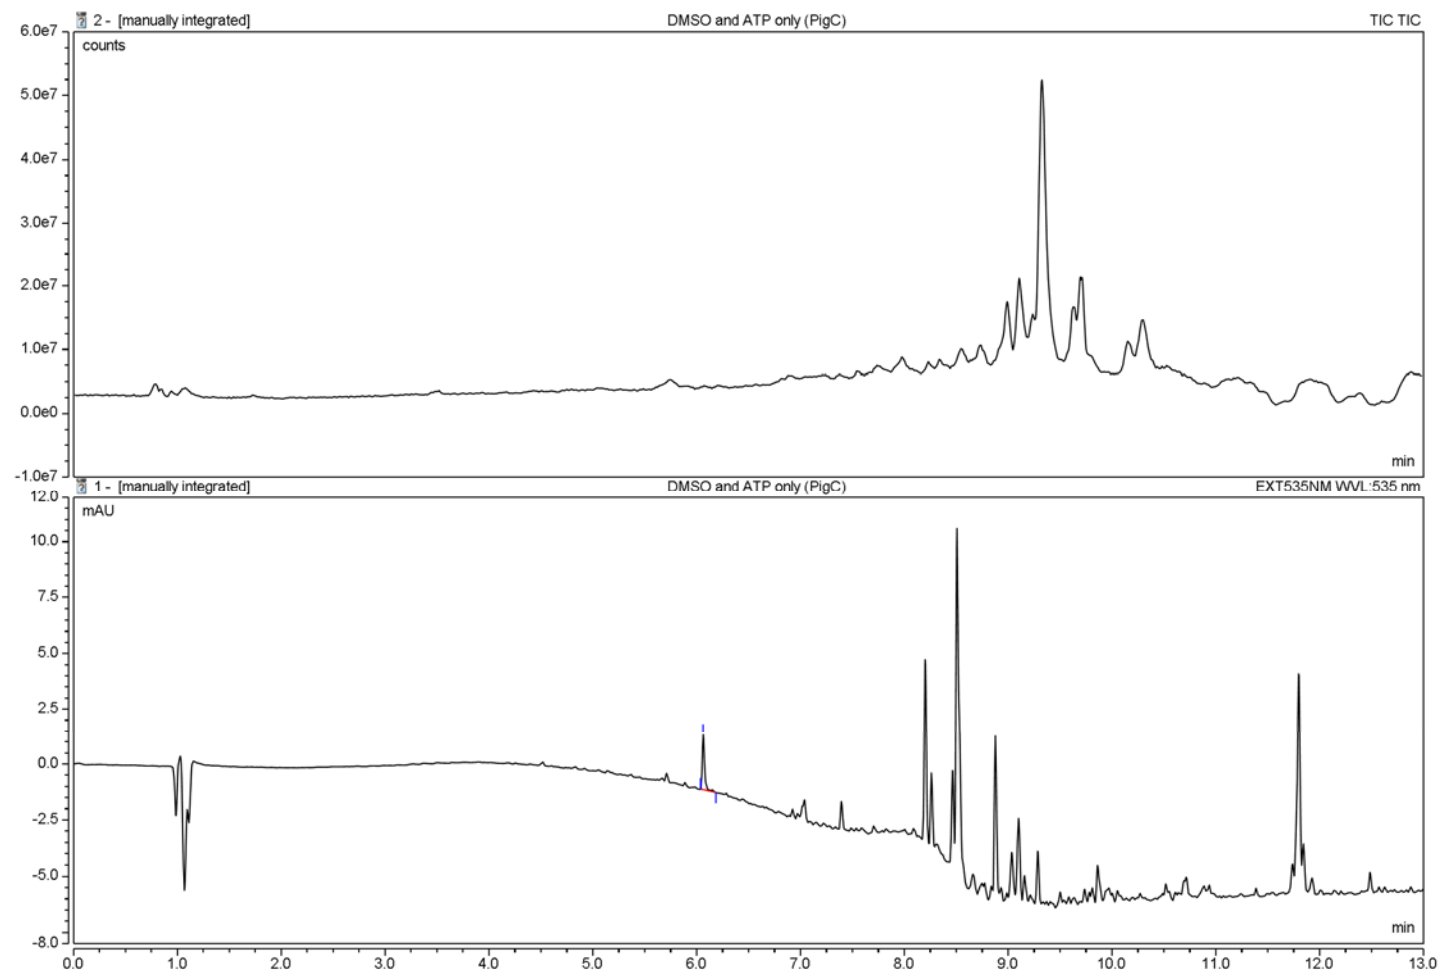

**Figure S108:** LC-MS data (TIC and UV<sub>535</sub> trace) of the methanolic reaction extract from the PigC negative control reaction, containing ATP and DMSO only, but no pyrroles or MBC derivatives.

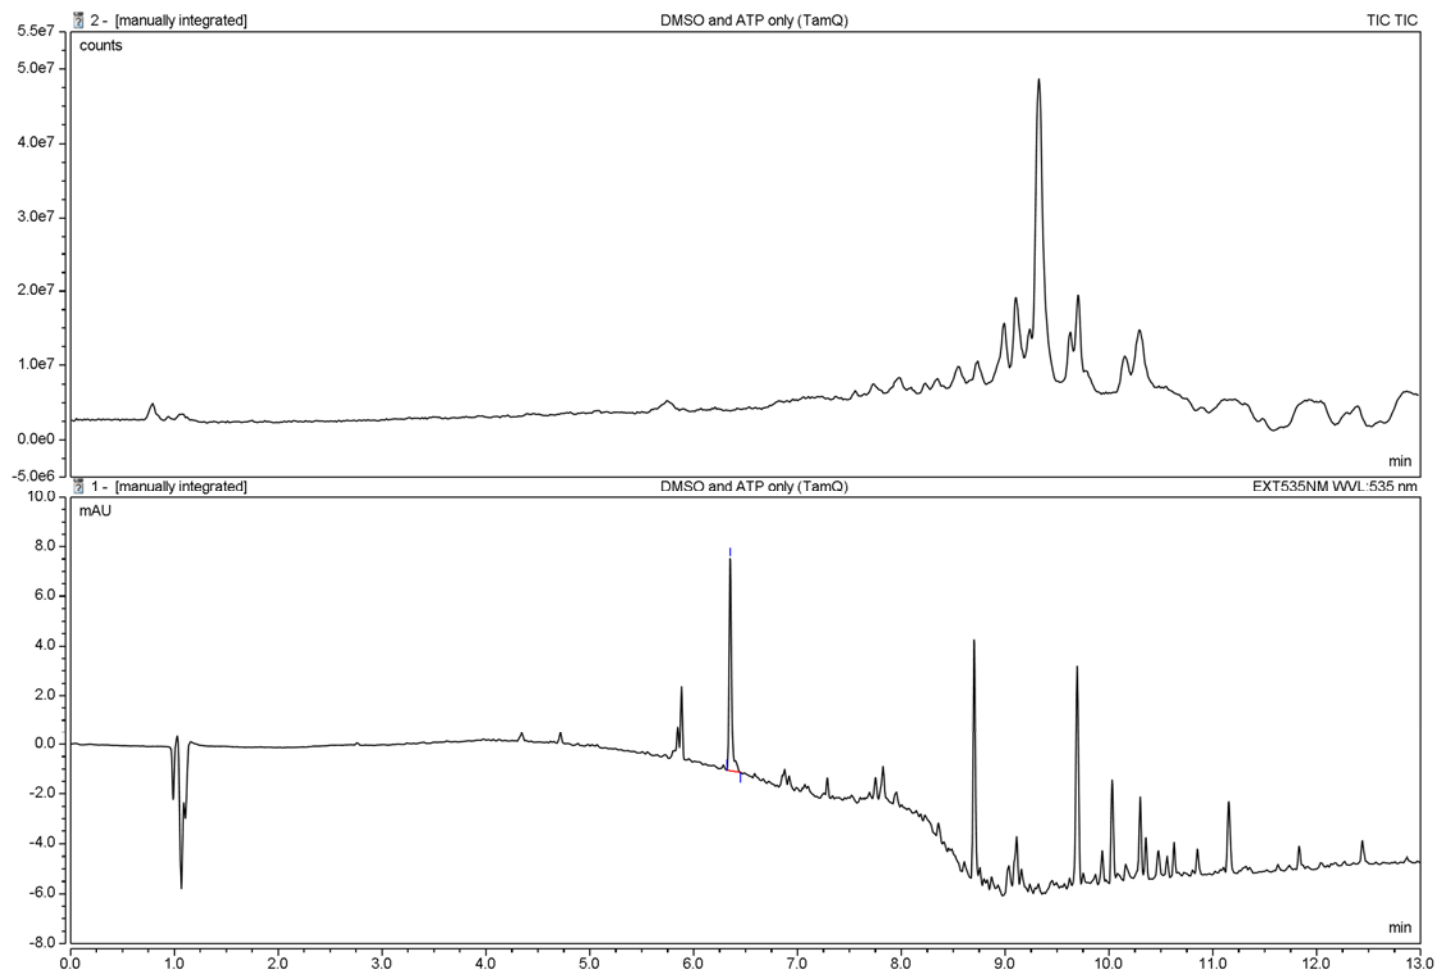

**Figure S109:** LC-MS data (TIC and UV<sub>535</sub> trace) of the methanolic reaction extract from the TamQ negative control reaction, containing ATP and DMSO only, but no pyrroles or MBC derivatives.

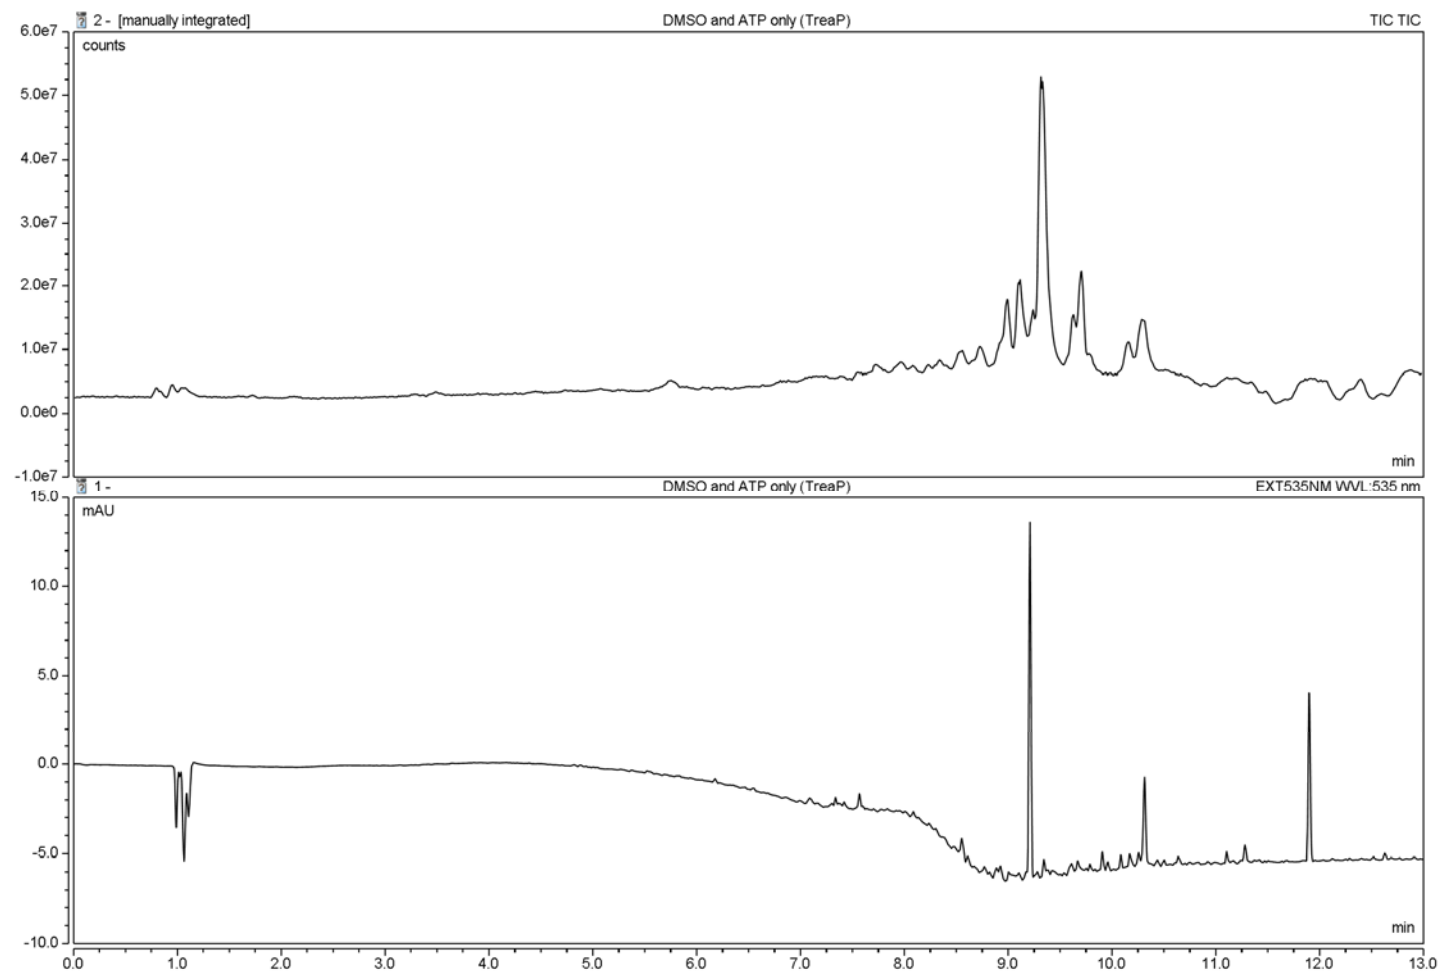

**Figure S110:** LC-MS data (TIC and UV<sub>535</sub> trace) of the methanolic reaction extract from the TreaP negative control reaction, containing ATP and DMSO only, but no pyrroles or MBC derivatives.



#### 14. LC-MS Chromatograms – Control Reactions

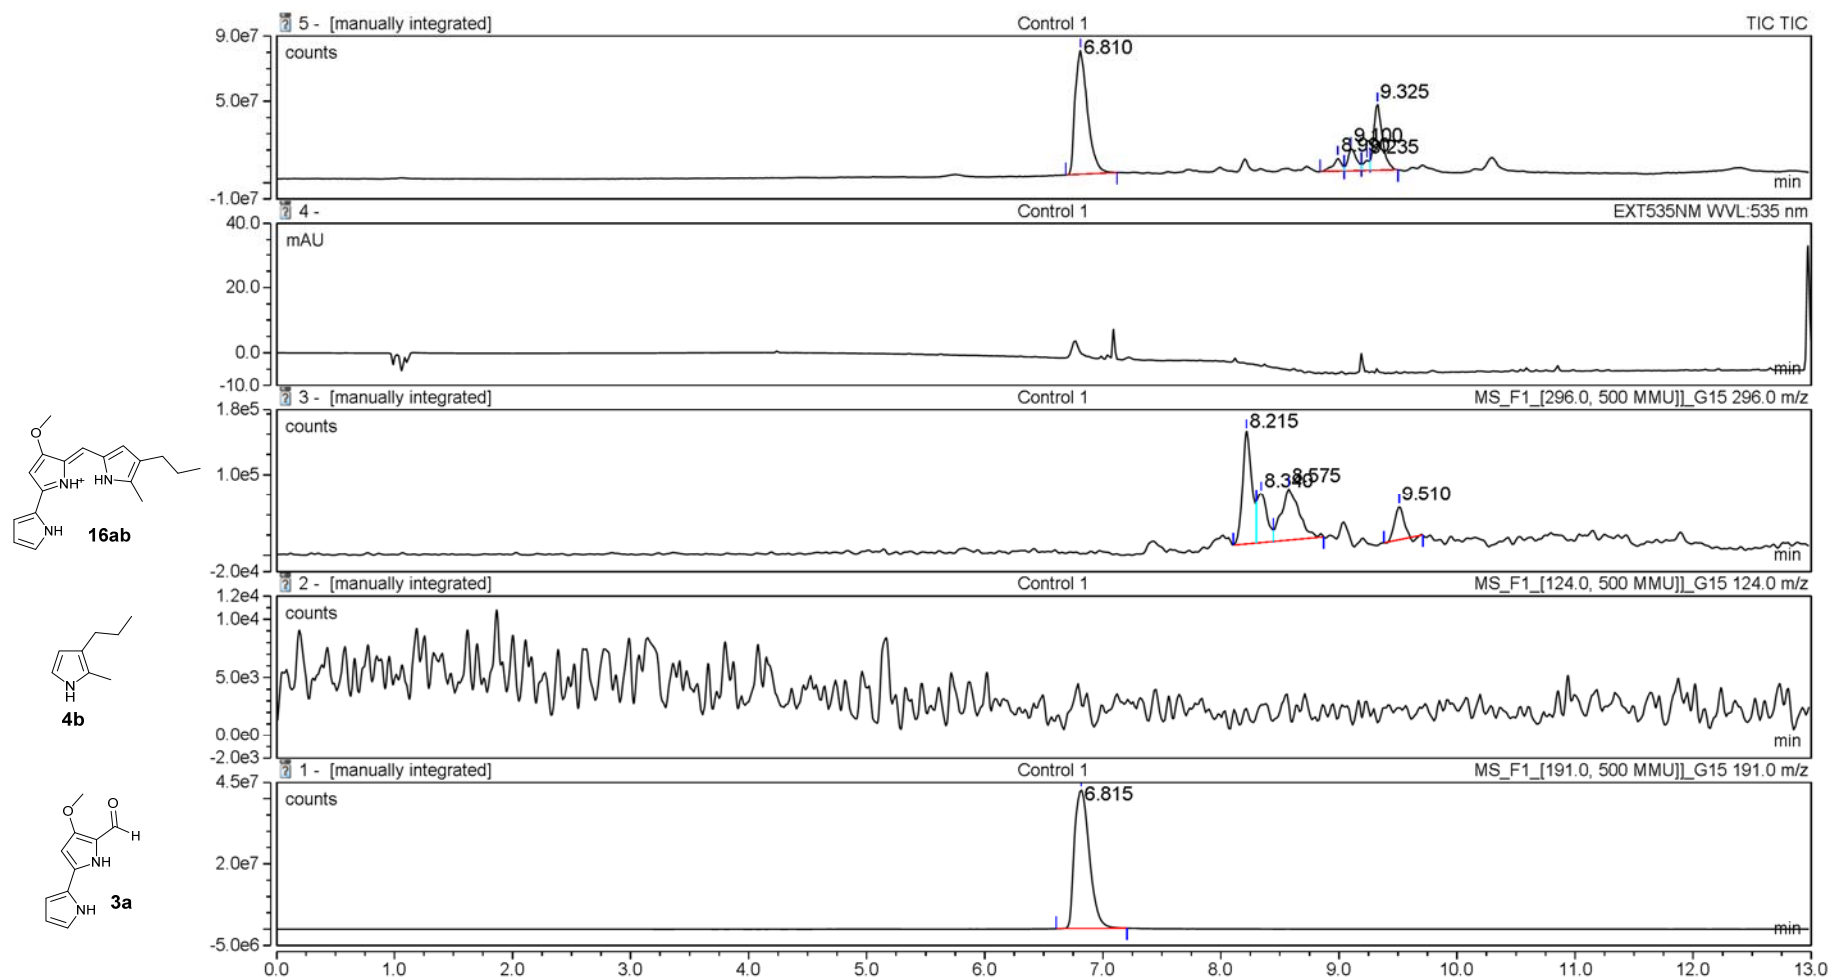

**Figure S111:** LC-MS data (TIC, UV<sub>535</sub>, and extracted ion chromatograms) of control reaction 1, containing MBC **3a** (m/z 191.0) and pyrrole **4b** (m/z 124.0), ATP and KP<sub>i</sub> buffer, but no enzyme containing cell lysates. The potential condensation product prodiginine **16ab** (m/z 296.0) with a retention time  $t_R$  of 7.33 min is not found in the UV trace at 535 nm.

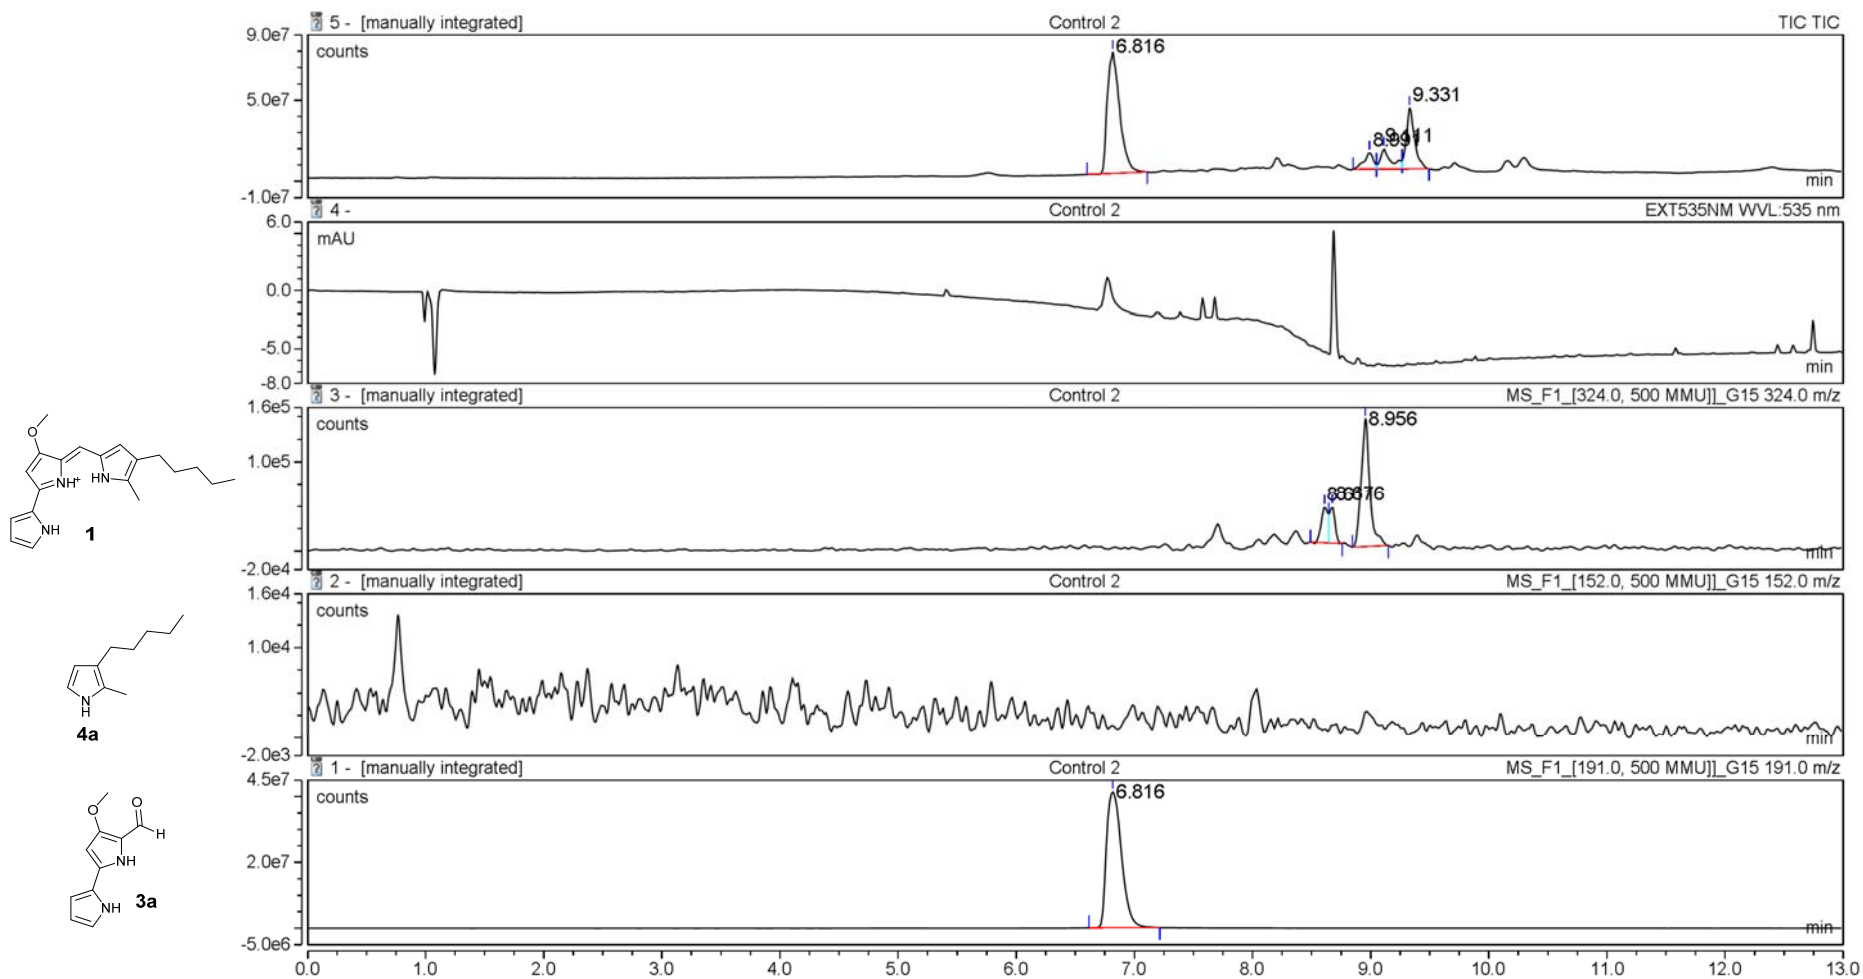

**Figure S112:** LC-MS data (TIC, UV<sub>535</sub>, and extracted ion chromatograms) of control reaction 2, containing MBC **3a** (m/z 191.0) and pyrrole **4a** (m/z 152.0), ATP and K<sub>p</sub>i buffer, but no enzyme containing cell lysates. The potential condensation product prodigiousin **1** (m/z 324.0) with a retention time  $t_R$  of 7.62 min is not found in the UV trace at 535 nm.

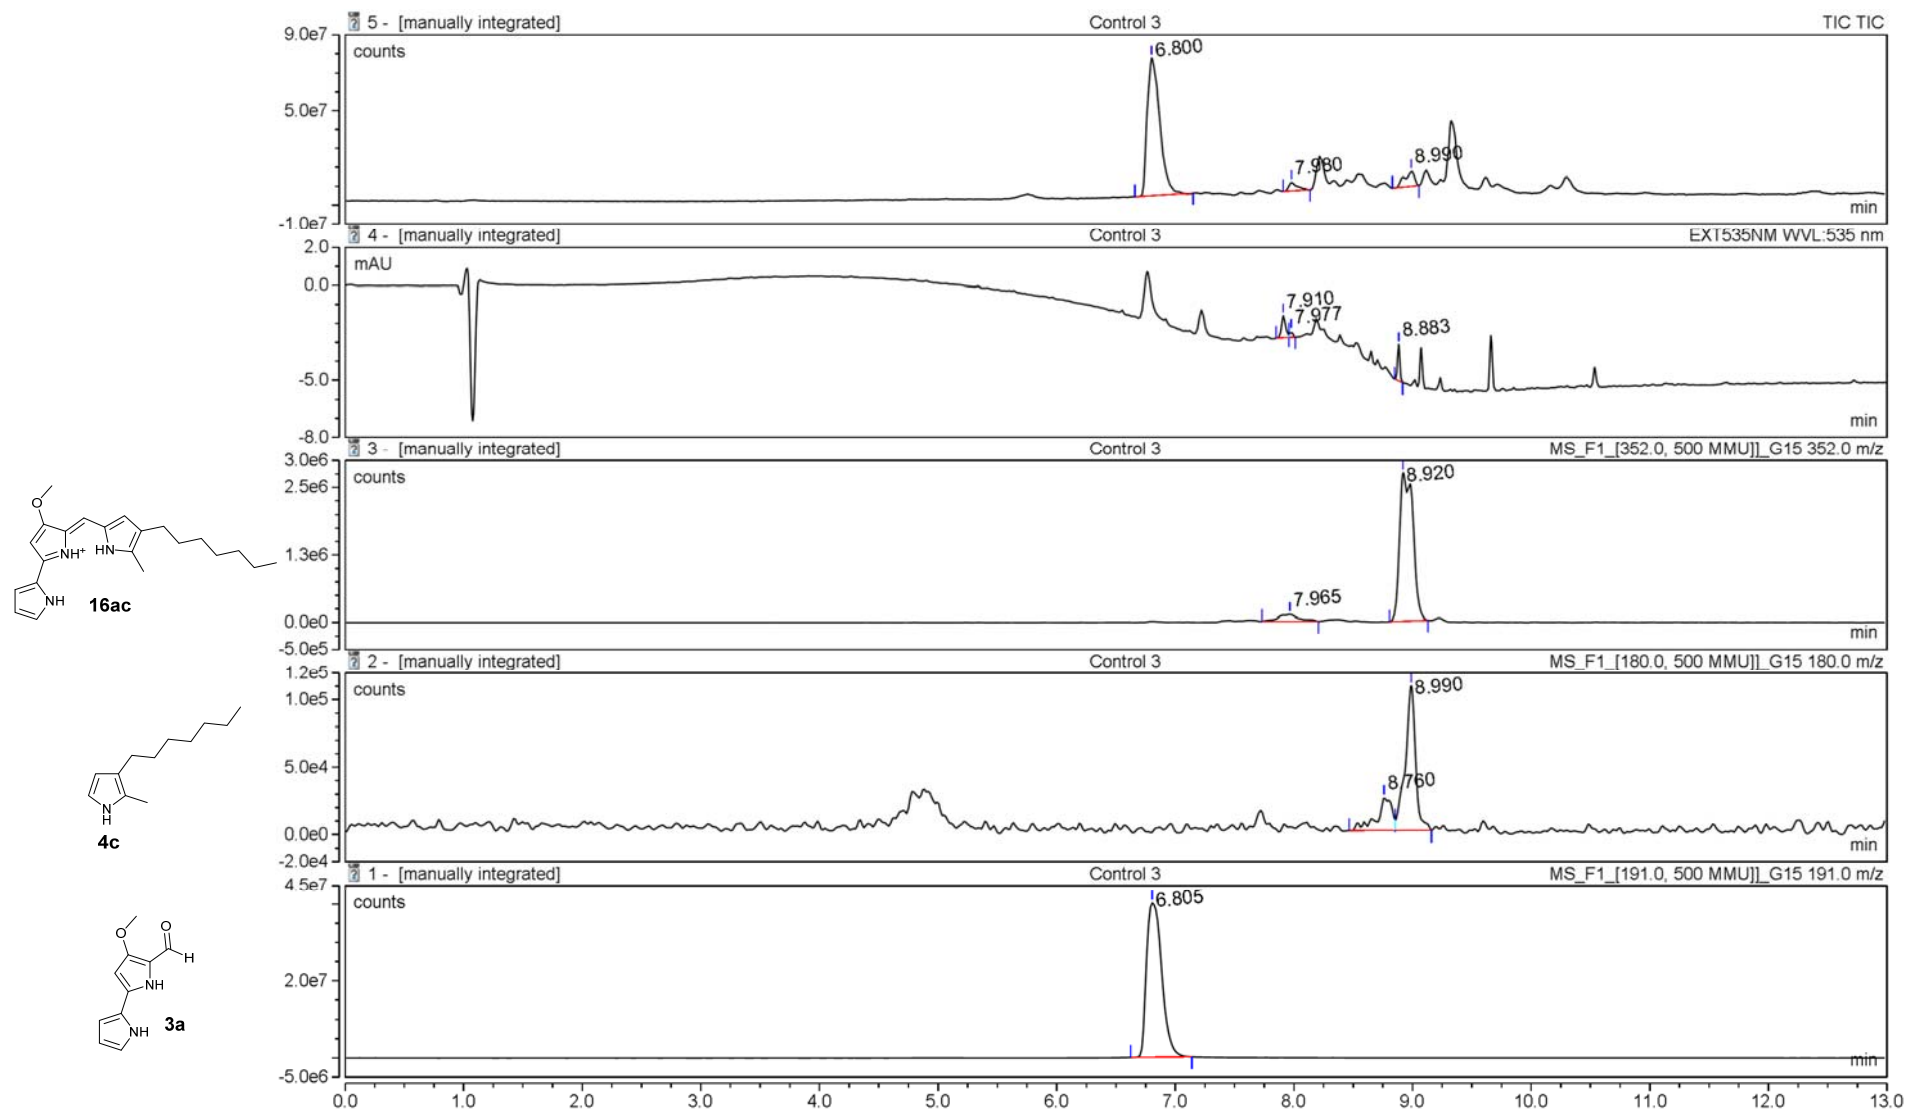

**Figure S113:** LC-MS data (TIC, UV<sub>535</sub>, and extracted ion chromatograms) of control reaction 3, containing MBC **3a** (m/z 191.0) and pyrrole **4c** (m/z 180.0), ATP and KP<sub>i</sub> buffer, but no enzyme containing cell lysates. The potential condensation product prodiginine **16ac** (m/z 352.0) with a retention time  $t_R$  of 7.87 min is not found in the UV trace at 535 nm.

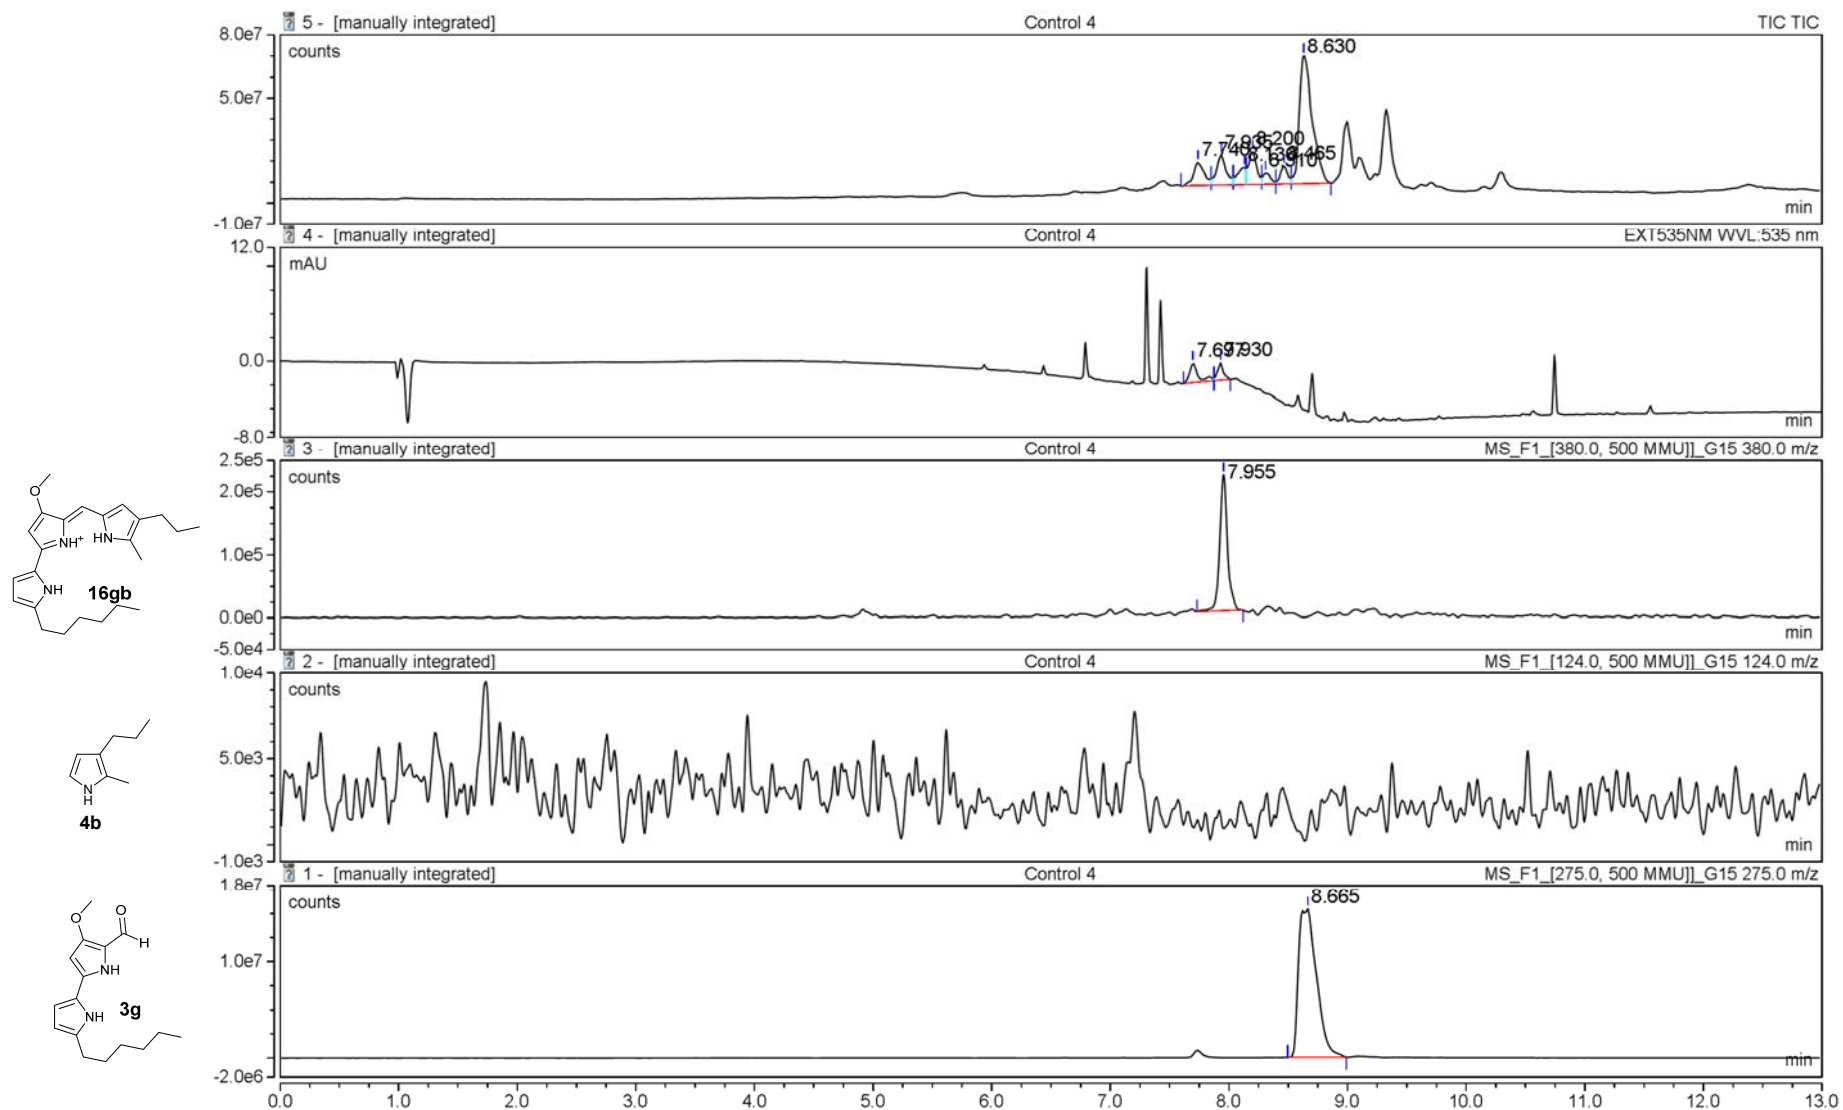

**Figure S114:** LC-MS data (TIC, UV<sub>535</sub>, and extracted ion chromatograms) of control reaction 4, containing MBC **3g** (m/z 275.0) and pyrrole **4b** (m/z 124.0), ATP and KP<sub>i</sub> buffer, but no enzyme containing cell lysates. The potential condensation product prodiginine **16gb** (m/z 380.0) with a retention time  $t_R$  of 7.91 min is not found in the UV trace at 535 nm.

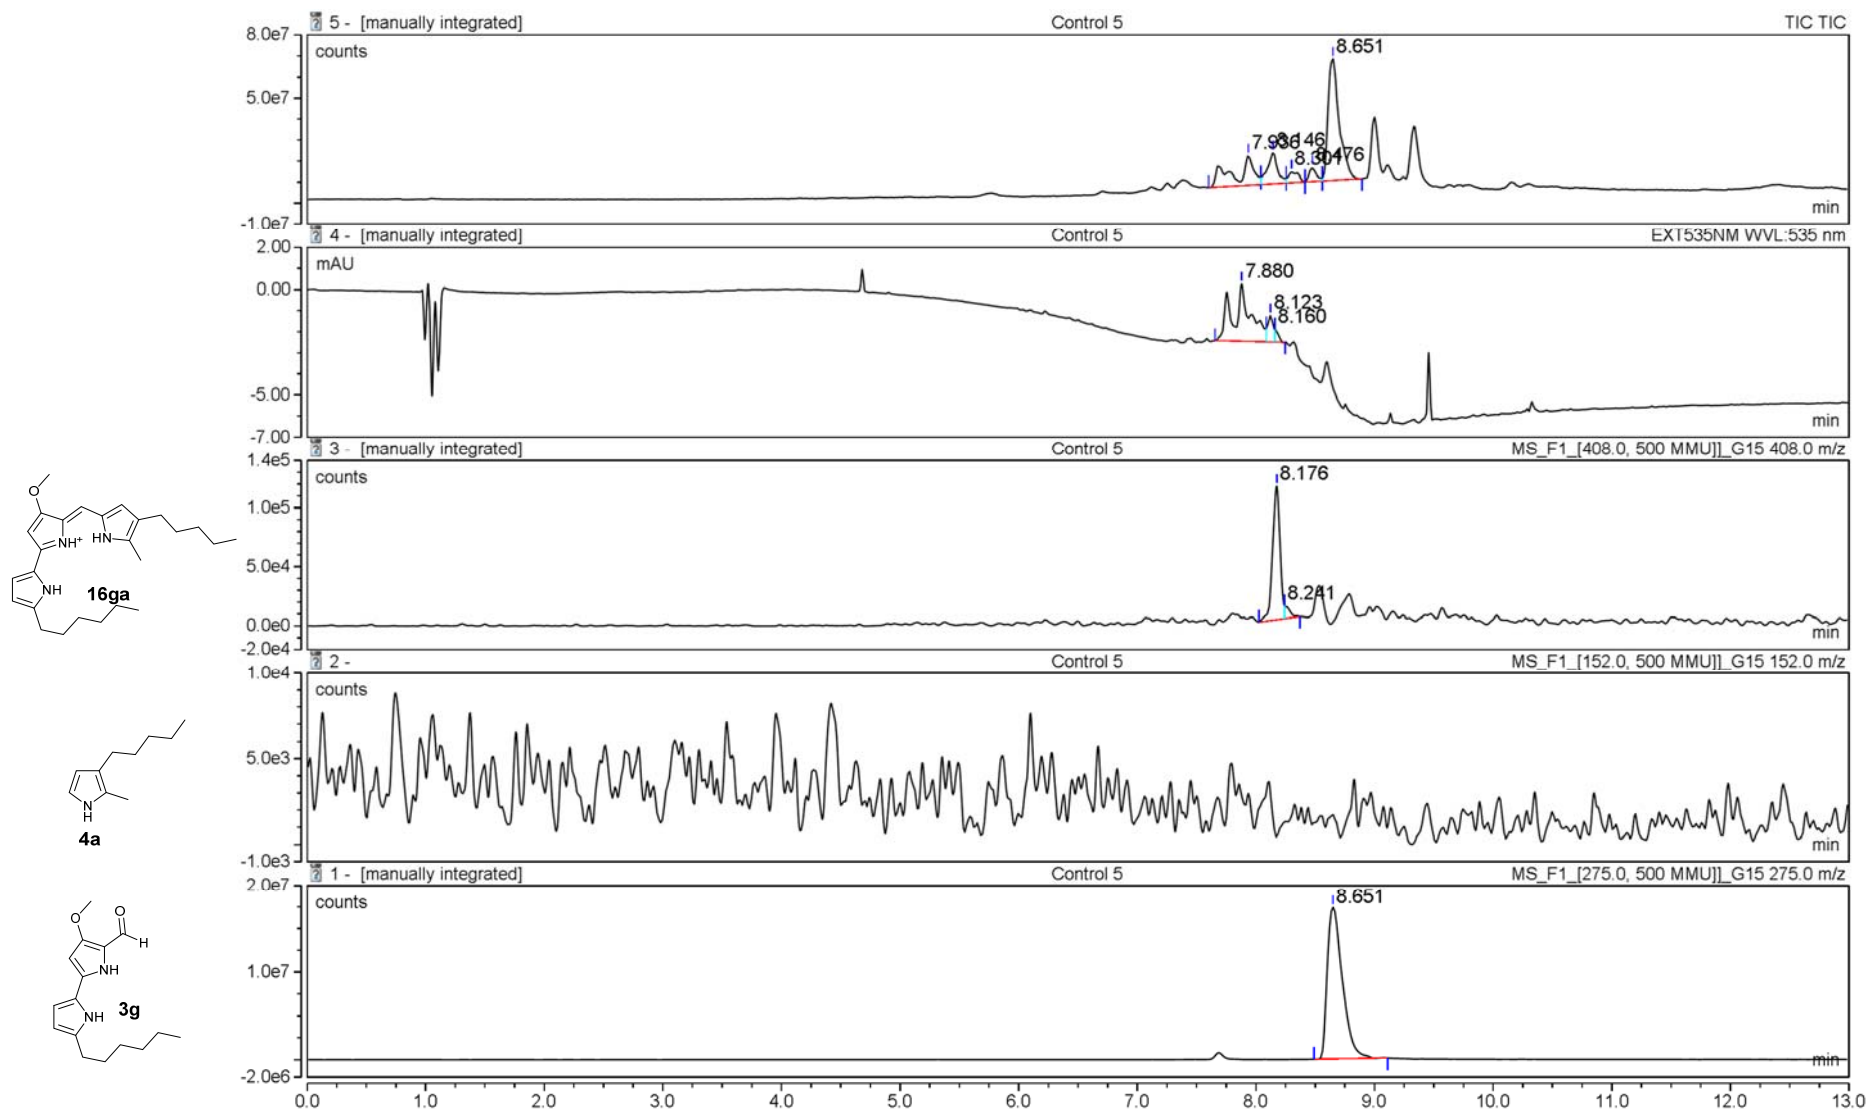

**Figure S115:** LC-MS data (TIC, UV<sub>535</sub>, and extracted ion chromatograms) of control reaction 5, containing MBC **3g** (m/z 275.0) and pyrrole **4a** (m/z 152.0), ATP and KP<sub>i</sub> buffer, but no enzyme containing cell lysates. The potential condensation product prodigiosin **16ga** (m/z 408.0) with a retention time  $t_R$  of 8.12 min is not found in the UV trace at 535 nm.

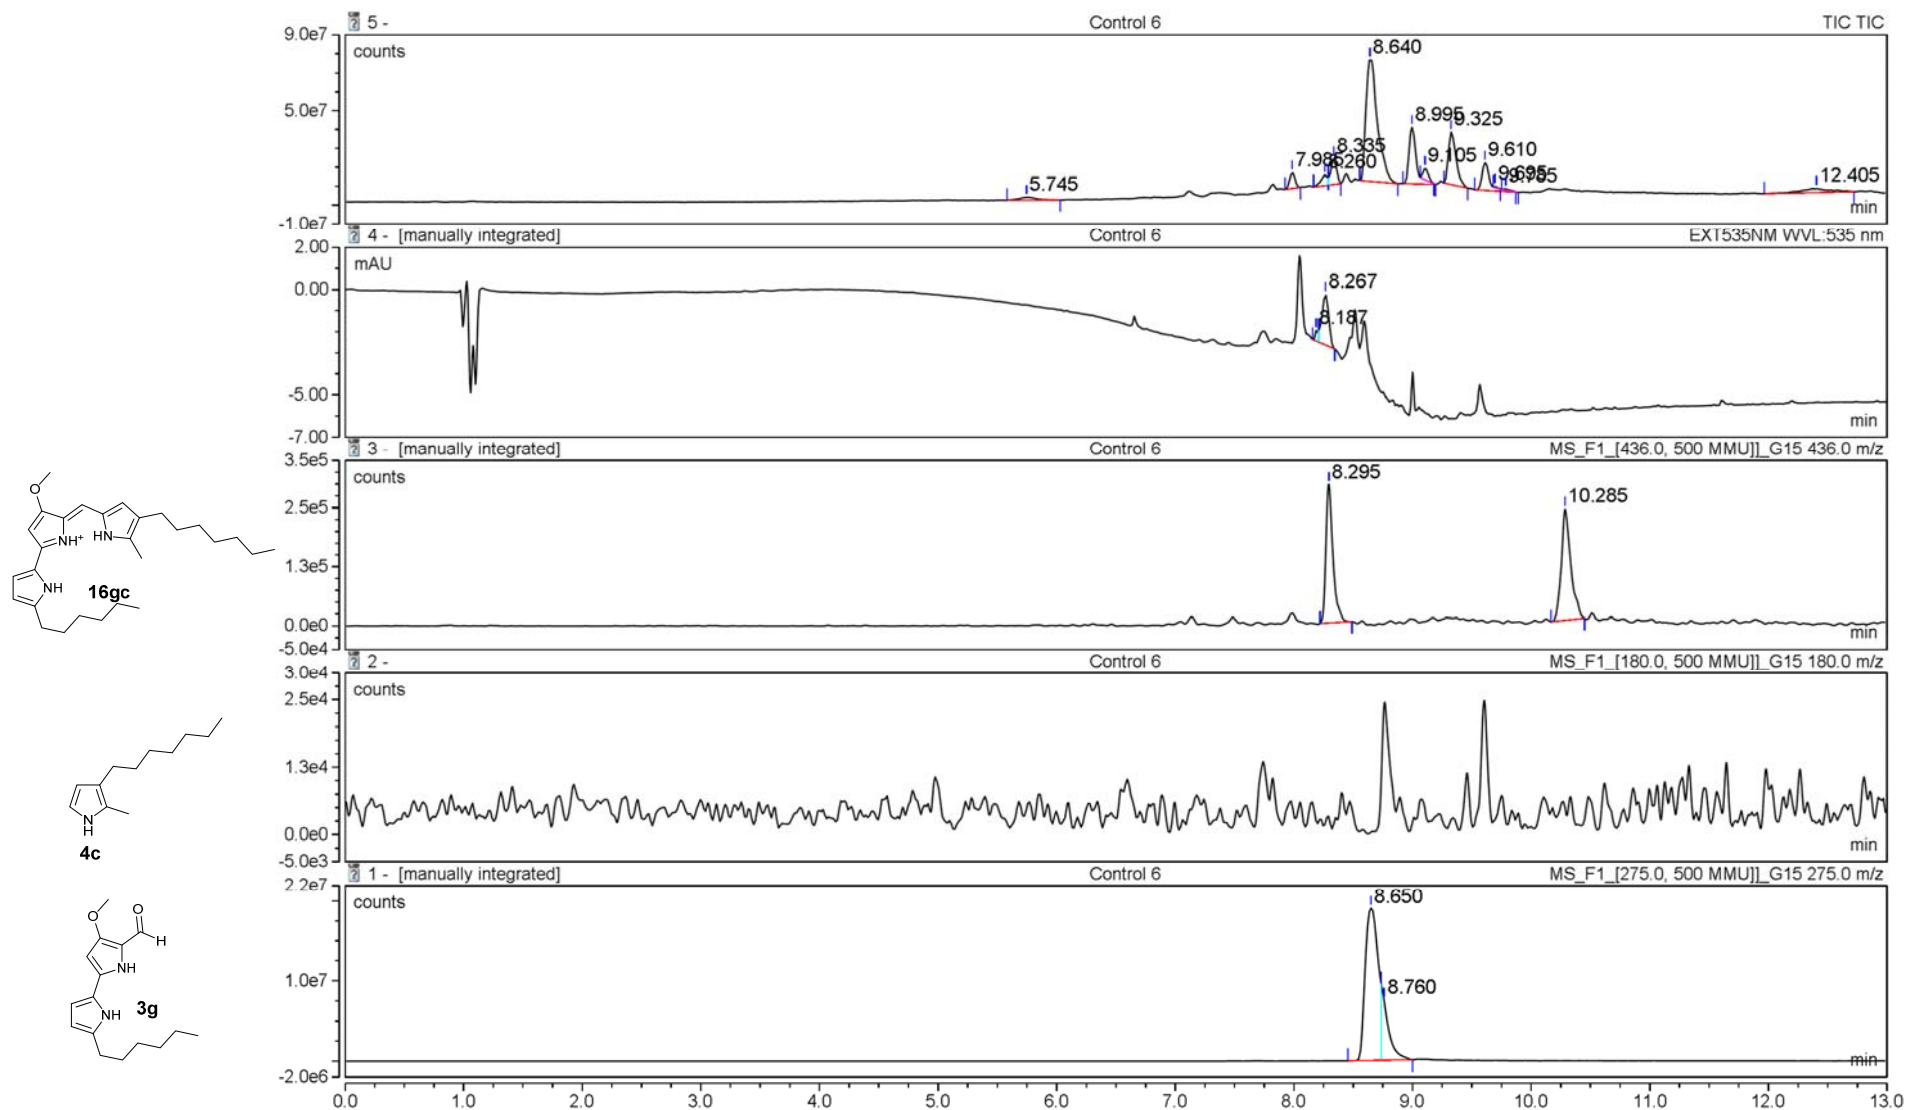

**Figure S116:** LC-MS data (TIC, UV<sub>535</sub>, and extracted ion chromatograms) of control reaction 6, containing MBC **3g** (m/z 275.0) and pyrrole **4c** (m/z 180.0), ATP and KP<sub>i</sub> buffer, but no enzyme containing cell lysates. The potential condensation product prodigiosin **16gc** (m/z 436.0) with a retention time  $t_R$  of 8.27 min is not found in the UV trace at 535 nm.

15. Dose-response plots for cell viability screening of urothelial carcinoma cell lines RT-112 and RT-112<sup>res</sup> with chemically synthesised prodiginines 16a–gb, prodigiosin (1), and obatoclax mesylate

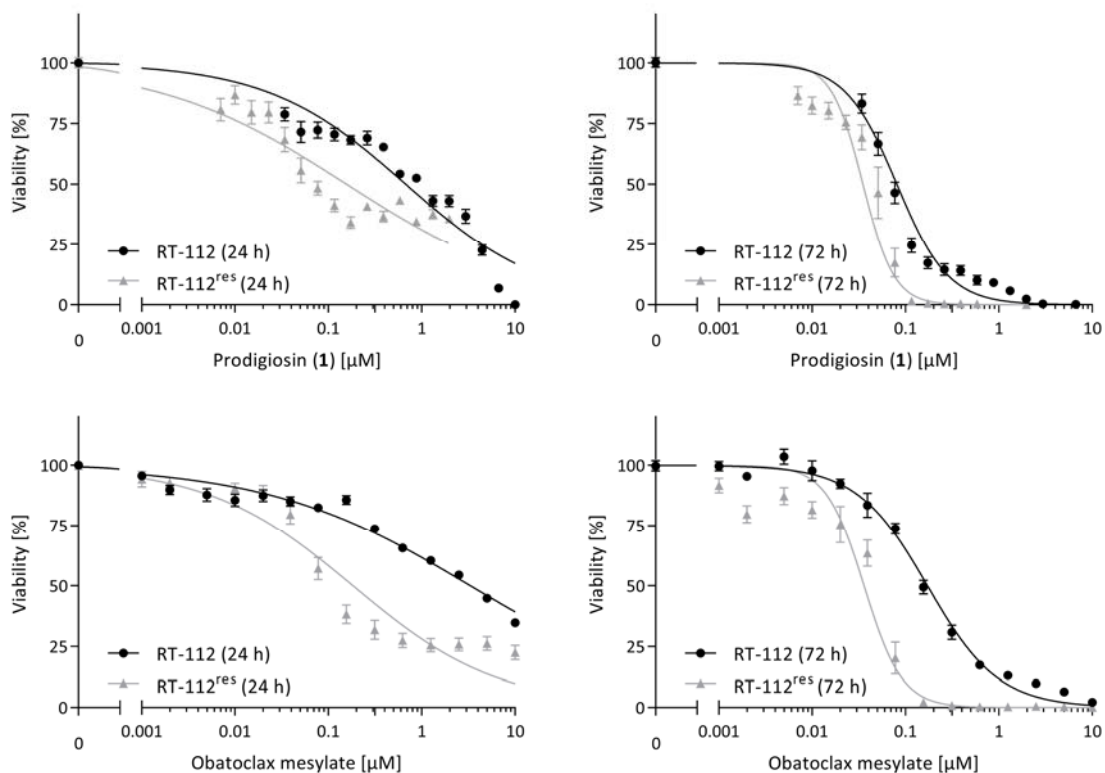

**Figure S117:** Dose-response curves of urothelial cancer cell lines RT-112 (black circles) and the cisplatin-resistant progeny RT-112<sup>res</sup> (grey triangles) for prodigiosin (1) and obatoclax mesylate. Cell viability was determined via MTT assay and plotted against the prodiginine concentration ( $\mu\text{M}$ ). The left column contains the viability read out after 24 h of incubation, the right column contains the viability read out after 72 h of incubation. Error bars in the corresponding colour represent standard deviations. Three biological replicates were prepared for each experiment and each biological replicate comprised data of three technical replicates.

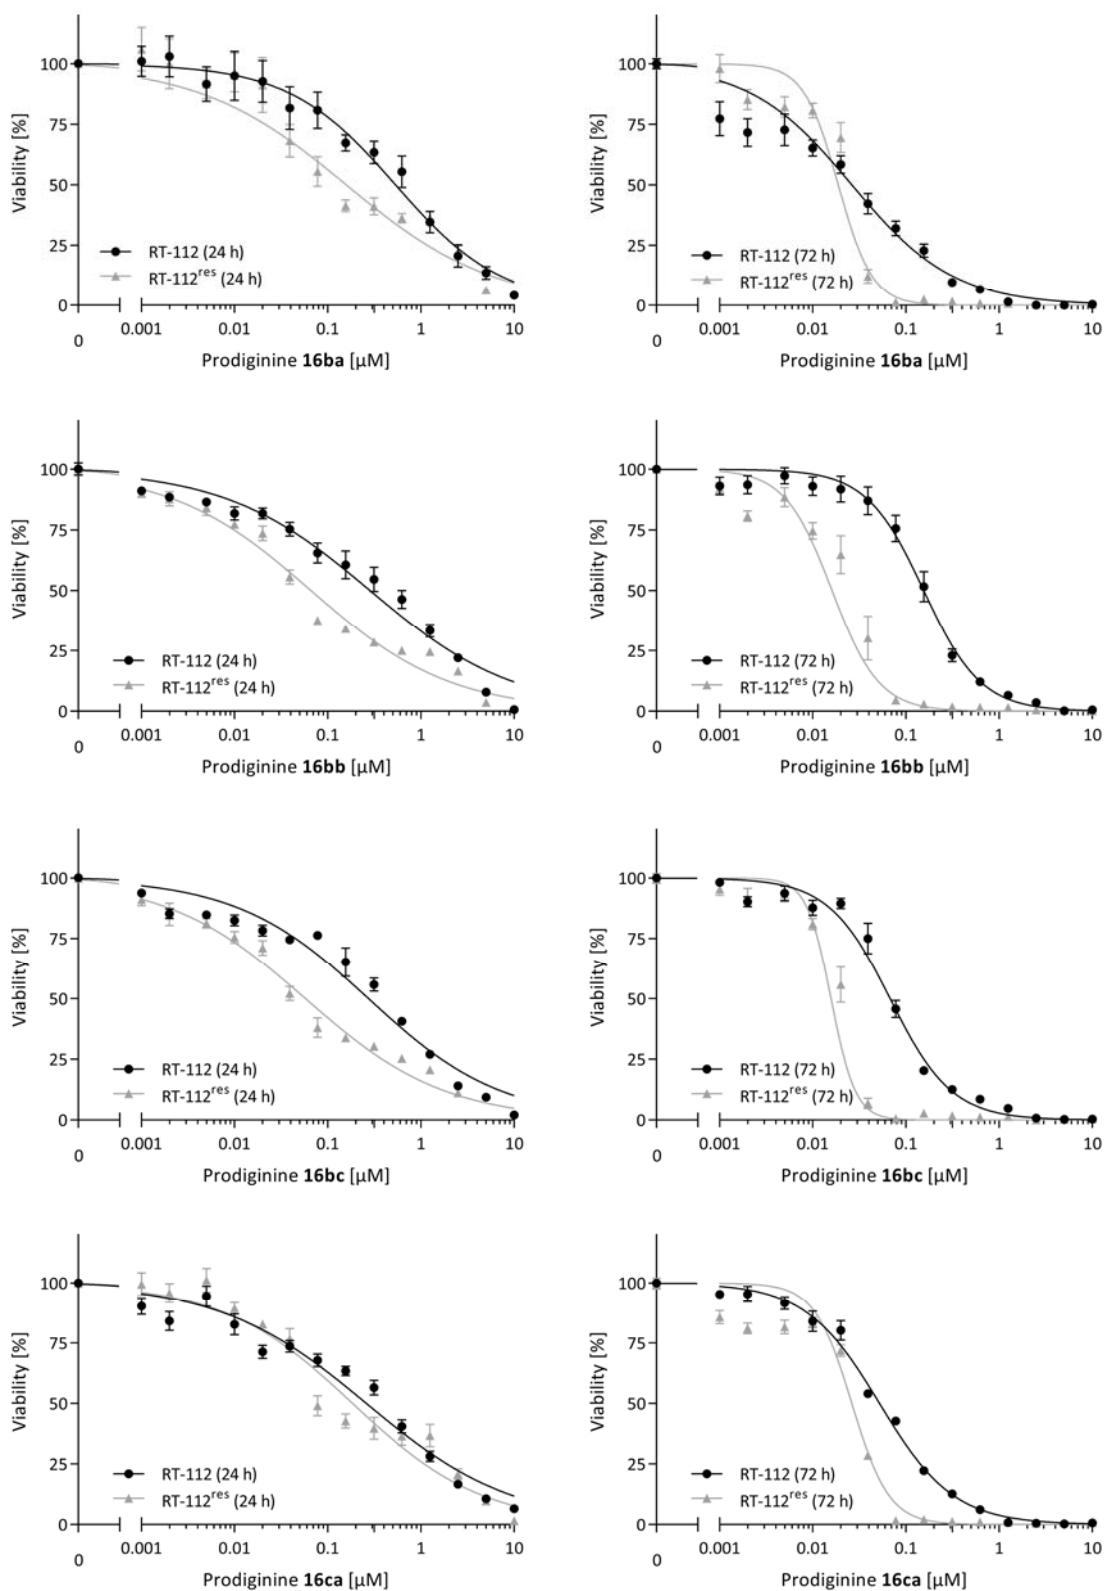

**Figure S118:** Dose-response curves of urothelial cancer cell lines RT-112 (black circles) and the cisplatin-resistant progeny RT-112<sup>res</sup> (grey triangles) for chemically synthesised prodiginines **16ba**, **16bb**, **16bc**, and **16ca**. Cell viability was determined via MTT assay and plotted against the prodiginine concentration ( $\mu\text{M}$ ). The left column contains the viability read out after 24 h of incubation, the right column contains the viability read out after 72 h of incubation. Error bars in the corresponding colour represent standard deviations. Three biological replicates were prepared for each experiment and each biological replicate comprised data of three technical replicates.



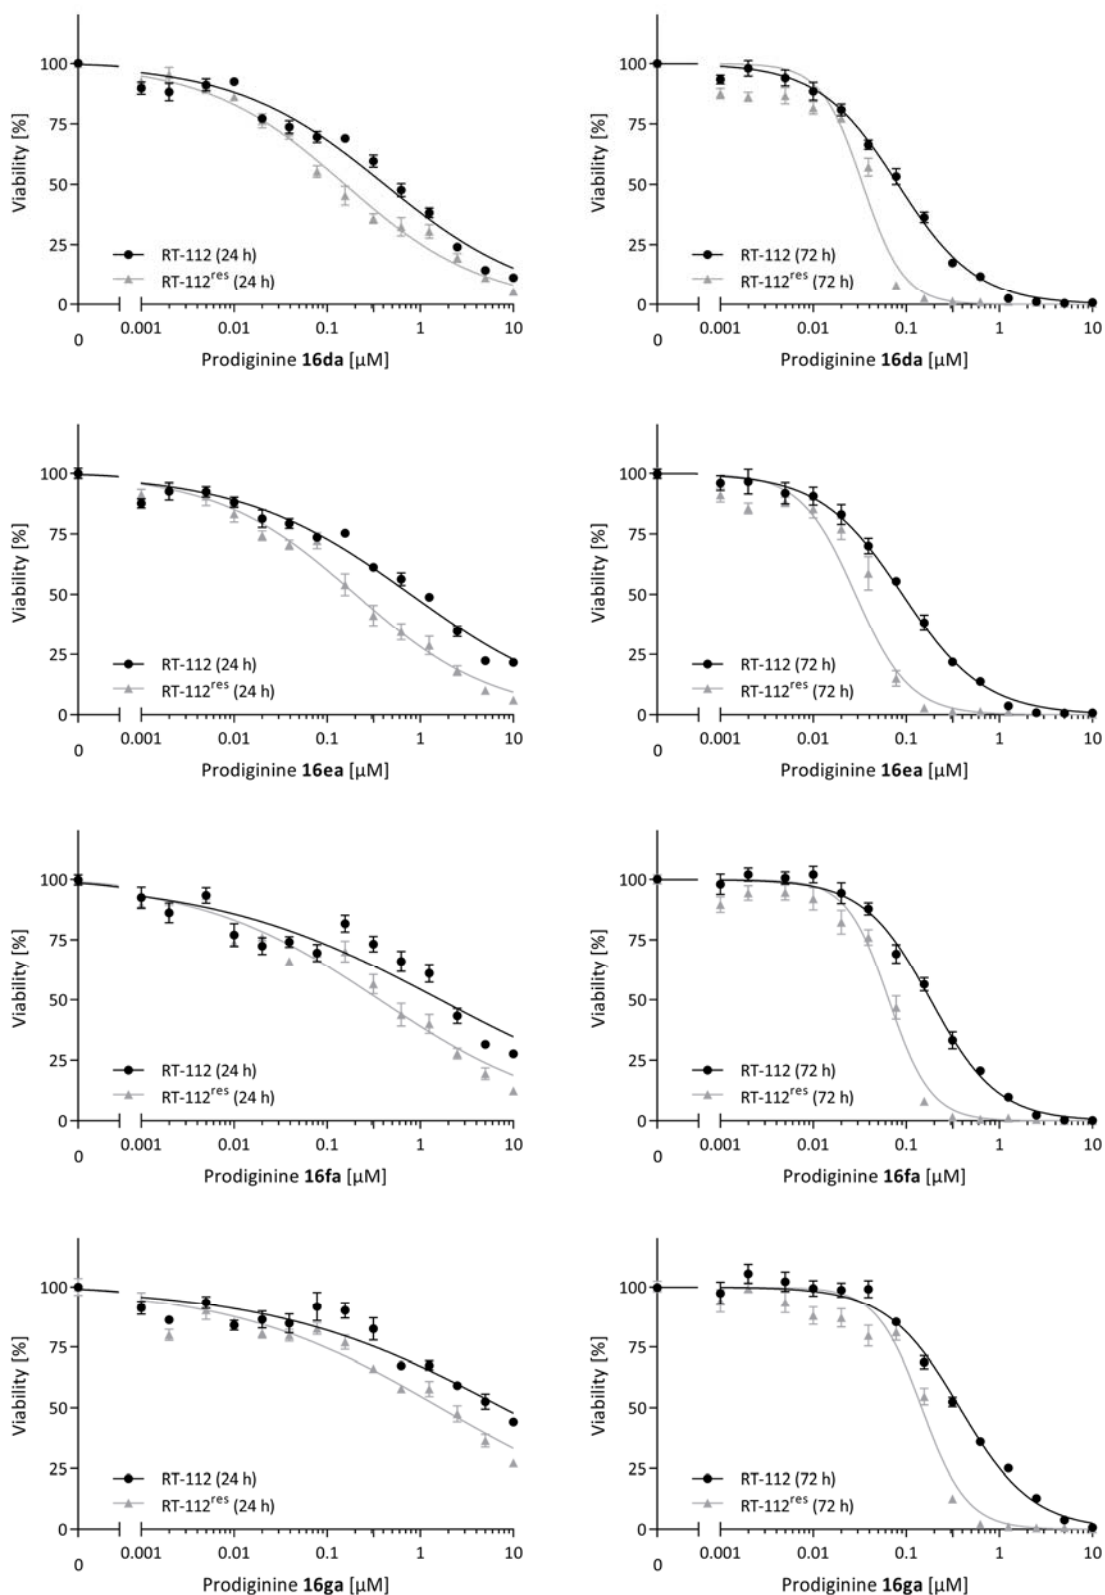

**Figure S119:** Dose-response curves of urothelial cancer cell lines RT-112 (black circles) and the cisplatin-resistant progeny RT-112<sup>res</sup> (grey triangles) for chemically synthesised prodiginines 16da, 16ea, 16fa, and 16ga. Cell viability was determined via MTT assay and plotted against the prodiginine concentration (μM). The left column contains the viability read out after 24 h of incubation, the right column contains the viability read out after 72 h of incubation. Error bars in the corresponding colour represent standard deviations. Three biological replicates were prepared for each experiment and each biological replicate comprised data of three technical replicates.

## 16. Inhibitory Concentrations (IC<sub>50</sub>) of prodiginines against urothelial cancer cell lines RT-112 and RT-112<sup>res</sup>

**Table S4:** Inhibitory concentrations of prodigiosin (1), obatoclax mesylate, and the prodiginines **16ba–16ga** against urothelial carcinoma cell lines RT-112 (cisplatin sensitive) and RT-112<sup>res</sup> (cisplatin resistant) after 24 h and 72 h of incubation. The presented IC<sub>50</sub> (nM) are visualised as bar diagram in figure 6B in the main article and summarise the data from the dose-response curves (Figure S117-S119). The displayed errors represent the 95% confidence interval.

| Prodiginine               | 24 h        |                       | 72 h        |                       |
|---------------------------|-------------|-----------------------|-------------|-----------------------|
|                           | RT-112      | RT-112 <sup>res</sup> | RT-112      | RT-112 <sup>res</sup> |
| <b>Prodigiosin (1)</b>    | 675 ± 92    | 157 ± 31.4            | 73.8 ± 4.90 | 41.1 ± 3.80           |
| <b>Obatoclax mesylate</b> | 3327 ± 548  | 184 ± 36.3            | 172 ± 13.8  | 36.0 ± 2.99           |
| <b>16ba</b>               | 535 ± 178   | 1586 ± 44.8           | 26.3 ± 3.12 | 18.8 ± 1.25           |
| <b>16bb</b>               | 285 ± 60    | 66.3 ± 10.2           | 155 ± 20.1  | 16.1 ± 1.02           |
| <b>16bc</b>               | 274 ± 48    | 57.4 ± 9.65           | 67.7 ± 5.96 | 15.7 ± 0.77           |
| <b>16ca</b>               | 260 ± 51    | 185 ± 43.6            | 52.1 ± 3.29 | 26.3 ± 1.83           |
| <b>16da</b>               | 414 ± 64    | 155 ± 24.0            | 81.3 ± 7.24 | 34.0 ± 2.92           |
| <b>16ea</b>               | 789 ± 132   | 201 ± 34.8            | 90.8 ± 10.2 | 28.4 ± 2.57           |
| <b>16fa</b>               | 1650 ± 758  | 367 ± 80.0            | 182 ± 19.0  | 64.9 ± 6.20           |
| <b>16ga</b>               | 7752 ± 4588 | 1648 ± 489            | 375 ± 41.5  | 146 ± 1.66            |
